# Supplementary material for: Group Selection and Contribution of Minority Variants during Virus Adaptation Determines Virus Fitness and Phenotype
Source: PubMed Central journal article supplement (PMC4420505; doi:10.1371/journal.ppat.1004838), 2015-05-05

**A**

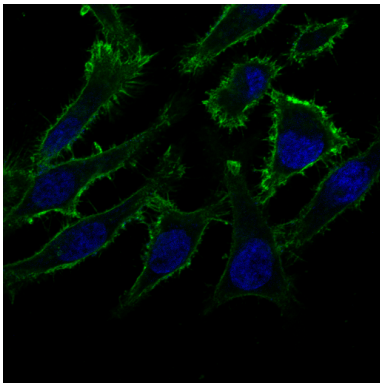

**B**

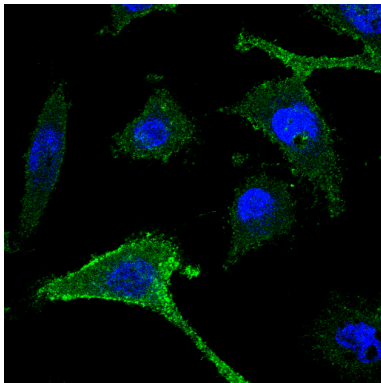

Supplement: ppat.1004838.s001.pdf [file ppat.1004838.s001.pdf]
