# Supplementary material for: Group Selection and Contribution of Minority Variants during Virus Adaptation Determines Virus Fitness and Phenotype
Source: PLoS Pathog. 2015 May 5;11(5):e1004838. doi: 10.1371/journal.ppat.1004838 (PMC4420505; doi:10.1371/journal.ppat.1004838)
Supplement: S1 Dataset — The following tables reveal all of the minority variants identified by bioinformatic analysis that are present at frequencies above 0.001 (0.1% of total population). The limit of detection where variants could not be distinguished from background error was always above 0.0001 frequency, but for clarity, variants at 0.0001 to 0.001 frequencies are not shown. The total number of variants in each population are quite similar, ranging from 1779 to 2005. The majority of these are very low frequency variants that do not change over the passage series. As would be expected by the generally neutral nature of synonymous mutations, nearly half of low frequency variants are synonymous. In some cases however, a number of synonymous mutations are found at increasing frequency from passage 1 to 40 (eg. nt. position 920 in replicate 4), or at significantly higher, yet relatively constant, frequency over the passage series (eg. nt. position 1283 in replicate 4). Their presence may indicate variants altering RNA structure, codon usage or other factors influencing fitness, but may also result from stochastic fixation of neutral mutations since they generally appear in only one of six replicates. Some variants with amino acid changes are present at considerable frequencies, without significant increase or decrease over the passage series (eg. VP1 position 104–106). Their contribution to the fitness of the population has not been studied here, but lack of increase in frequency suggests that they do not play a role in adaptation to A549 cells. Data from these tables was used to generate panels in Fig 4. (XLSX) [file ppat.1004838.s004.xlsx]

## Sheet: replicate 1
Feature	Position	Reference	Aternate	AA_position	AA_change	p1	p3	p5	p7	p9	p11	p13	p15	p17	p19	p21	p23	p25	p27	p29	p31	p33	p35	p37	p39	p40
VP4	779	A	G	1	synonymous>G	0.0024375	0.00215625	0.00210938	0.00316406	0.00196875	0.00317969	0.00345313	0.00396875	0.00359375	0.0034375	0.00349219	0.00515625	0.00385937	0.003125	0.00257813	0.002125	0.00259375	0.00340625	0.00260156	0.00203125	0.00195312
VP4	780	G	A	2	A>T									0.00253125	0.00283594	0.00850781	0.0121505	0.0121094	0.0101562
VP4	782	T	C	2	synonymous>A	0.00136719	0.00215625	0.00260156	0.0053125	0.00565625	0.00589063	0.006125	0.0101562	0.00840625	0.0108964	0.012058	0.0130962	0.0121299	0.00970395	0.00370313	0.00336719	0.0025625	0.0019375	0.00303125	0.00228125	0.00133984
VP4	783	C	G	3	Q>E																				0.0015
VP4	784	A	G	3	Q>R							0.00132813							0.0015				0.00163281
VP4	785	A	G	3	synonymous>Q	0.00128125	0.00192969	0.00169531	0.00241406	0.00186719	0.00136719	0.00160547	0.00141406	0.001625	0.00147656	0.00240625	0.00303125	0.00344531	0.0028125	0.00153125	0.00195312	0.0014375	0.00238281	0.0018125	0.00128906	0.00186719
VP4	787	T	C	4	V>A				0.00109375	0.00128125	0.00120312	0.00175	0.00124219	0.00180469	0.00134375	0.00132031		0.00109375	0.00126563	0.00128906	0.00139063		0.00128906
VP4	788	A	G	4	synonymous>V	0.00135937	0.00219531	0.00127344	0.00172656	0.0014375	0.00134766	0.00148047	0.00207031	0.00173438	0.00183594	0.00153125	0.00145313	0.00185938	0.00295312	0.00226562	0.0026875	0.00184375	0.00199219	0.00257813	0.00146094	0.00185938
VP4	789	T	A	5	S>T															0.00144922
VP4	789	T	C	5	S>P									0.00101562	0.00135937						0.0010625	0.001125	0.00141406
VP4	791	A	G	5	synonymous>S		0.00239062	0.00151563	0.0016875	0.00162109	0.00111719	0.00160156	0.0016875	0.00134375	0.002375	0.00271875	0.00258594	0.00322656	0.00352344	0.00155469	0.00104688	0.002125	0.0023125	0.00137109	0.00163281	0.00183594
VP4	792	A	G	6	T>A										0.00135937								0.00121875	0.00123047	0.00140234	0.00117969
VP4	793	C	T	6	T>M																			0.0015	0.00113672	0.00104688
VP4	794	G	A	6	synonymous>T						0.001375		0.00146094	0.00102344	0.00109375			0.00121875	0.00103125		0.00113281
VP4	796	A	G	7	Q>R																0.00107812
VP4	797	A	G	7	synonymous>Q		0.00112109		0.00105469					0.00160938	0.00113672	0.00137109		0.00107812	0.00128906	0.00117188		0.00100781	0.00121875	0.0011875
VP4	799	A	G	8	K>R		0.00192188	0.001375	0.00217187	0.00166406	0.00189062	0.00215625	0.00217969	0.00276563	0.00171875	0.00209375	0.00204687	0.00228516	0.00246094	0.00176562	0.00175781	0.00167188	0.00245313	0.00178125	0.00166406	0.00144141
VP4	801	A	G	9	T>A		0.00118359	0.00184375	0.00188281	0.00153906	0.00130859	0.00180469	0.00321875	0.00121875	0.00216406	0.00147266	0.00221094	0.00175781	0.00144531	0.00192188	0.0025625	0.00139844	0.00201562	0.00217969	0.0023125	0.00214844
VP4	803	T	C	9	synonymous>T		0.00159375					0.0018125	0.00129297	0.00134375	0.00246875	0.00170312		0.00166406	0.00188281		0.00111719	0.00197656		0.00160156	0.00128125
VP4	806	G	A	10	synonymous>G															0.00227344
VP4	806	G	T	10	synonymous>G															0.00119141
VP4	809	A	G	11	synonymous>A		0.00102734	0.00136328	0.00100781	0.00178125	0.00148437	0.00160938	0.00160547	0.00115625	0.00117188	0.00117578	0.00151563	0.00157031	0.00185938	0.00195312		0.0014375	0.00169531	0.00138281	0.00120703	0.00164844
VP4	811	A	G	12	H>R		0.00197656	0.00142187	0.00128516	0.00101172		0.00142969	0.00124219	0.0011875		0.00103125	0.00141406	0.00111719	0.00150391	0.00153125			0.00179688	0.00134375	0.00101562
VP4	812	T	C	12	synonymous>H	0.0011875	0.00265625	0.00178125	0.00250781	0.00303125	0.00347656	0.00271094	0.00359375	0.00259375	0.00444531	0.00314063	0.00377344	0.00244531	0.004625	0.00201562	0.008625	0.00876562	0.00840625	0.00684375	0.00477344	0.00486719
VP4	814	A	G	13	E>G	0.00119531	0.00171094	0.0020625	0.00258594	0.00197266	0.00202344	0.00192188	0.00271875	0.00178906	0.00121094	0.0015	0.00160938	0.0020625	0.00215625	0.00223438	0.00175	0.0015	0.00188281	0.00236719	0.00209375	0.00222656
VP4	815	G	T	13	E>D								0.00121875	0.00160938	0.00184375	0.00140625	0.001625	0.00157031
VP4	816	A	G	14	T>A	0.00209375	0.00216406	0.00177344	0.00248437	0.00176172	0.00203906	0.00298437	0.00269531	0.00207813	0.00296875	0.00217969	0.00228125	0.00301563	0.00175781	0.00295312	0.00279688	0.0028125	0.00235937	0.00273437	0.00313281	0.00275
VP4	818	C	T	14	synonymous>T												0.00102734	0.00130078	0.00132422	0.00115625
VP4	819	A	G	15	R>G	0.00154687	0.00182812	0.00191406	0.00205469	0.00121875	0.0011875	0.00120312	0.00185156	0.00155469	0.0018125	0.0011875	0.00259375	0.00258594	0.00271875	0.00629687	0.00564063	0.00951891	0.0146382	0.0150082	0.0135691	0.0167763
VP4	820	G	A	15	R>K								0.00107812
VP4	821	G	A	15	synonymous>R																				0.001375
VP4	822	C	T	16	synonymous>L							0.00128125		0.00117188	0.00132031
VP4	823	T	C	16	L>P		0.00182031		0.00100391			0.00158594	0.00109375	0.00163281	0.00139063	0.0015	0.00132813	0.00135937	0.00214062	0.00101562	0.0019375	0.00175	0.00263281	0.00198438	0.00213281	0.00171094
VP4	825	A	G	17	N>D			0.00182812		0.00139844	0.00172656	0.00169922	0.00135937	0.00102344	0.00225	0.00134375	0.00131641	0.00278516	0.0040625	0.00895313	0.00314063	0.003	0.0073125	0.0135794	0.0207237	0.0237048
VP4	826	A	G	17	N>S		0.00119141	0.00101172	0.00124219	0.00153125	0.00101172	0.00162109	0.00116406		0.00107031	0.00135156	0.00140625	0.00204687	0.00199219	0.00192188	0.00270312		0.00126953	0.0014375	0.00131641	0.00117969
VP4	827	T	C	17	synonymous>N		0.00114844	0.00117969				0.0013125		0.00149219	0.00142969	0.00116406			0.00145313	0.00215625		0.00110156
VP4	828	G	A	18	A>T																	0.00105469	0.00173438	0.00157031	0.00101953	0.00104688
VP4	830	T	A	18	synonymous>A															0.002625
VP4	830	T	C	18	synonymous>A		0.00143359	0.00116406			0.0014375		0.00139063				0.00104688	0.00149219	0.00153125	0.00296875			0.00170312	0.00113281	0.00100391
VP4	831	A	G	19	S>G	0.00103906	0.00253906	0.00160938	0.00182031	0.00158594	0.00153906	0.00185547	0.00227344	0.00153125	0.00121875	0.00205859	0.00290625	0.00278125	0.0034375	0.002625	0.00235937	0.00130469	0.00157813	0.00141016	0.00203906	0.0015
VP4	833	C	T	19	synonymous>S			0.00104688	0.00135937		0.00105078	0.00117188	0.00102344							0.00105469
VP4	834	G	A	20	G>S									0.00173438	0.00123438					0.00228125		0.00115234	0.00200391	0.00114844		0.0015625
VP4	835	G	A	20	G>D														0.00179688					0.00113281	0.00135937	0.00129687
VP4	836	C	T	20	synonymous>G					0.001125										0.00216406	0.0180921	0.0251645	0.0295641	0.0254112	0.0168586	0.0189556
VP4	837	A	G	21	N>D									0.00166406						0.00307031	0.00146094	0.00330469	0.00475	0.005625	0.0089375	0.0122225
VP4	838	A	G	21	N>S								0.00117969				0.00115234	0.00129297		0.00244531
VP4	839	T	C	21	synonymous>N		0.00113281	0.00134766	0.00144531	0.00100391	0.00103125	0.0020625	0.0018125	0.00151563	0.00103906	0.00176172	0.00175	0.00229297	0.00236719	0.00259375	0.00219531	0.00157813	0.00195312	0.001375	0.00117188	0.00139844
VP4	840	T	C	22	S>P		0.00147656	0.00159375	0.00190625	0.00158203	0.00132031	0.00189844	0.00150781		0.00166406	0.00155469	0.00201562	0.00195312	0.002375	0.00192188	0.0023125	0.00276563	0.00189062	0.00215625	0.00197656	0.00123047
VP4	843	A	G	23	I>V		0.001375											0.00124219	0.00115625	0.00177344		0.00108203
VP4	844	T	A	23	I>N													0.00114062	0.00385156
VP4	844	T	C	23	I>T	0.00114062	0.002625	0.00254688	0.00241406	0.00117578	0.00195703	0.00196094	0.00185156	0.00346875	0.0024375	0.00246484	0.00190234	0.00259375	0.00322656	0.0050625	0.004375	0.00341406	0.00435938	0.00417187	0.00410938	0.00421875
VP4	845	C	T	23	synonymous>I				0.00128125						0.00108594	0.00126563	0.00160938	0.00164062	0.0020625		0.00273437	0.002625	0.00417969	0.00254688	0.00292969	0.00149219
VP4	846	A	G	24	I>V		0.00112891			0.00116406		0.00117969	0.00171875		0.00124609	0.00167969	0.00223438	0.00242969	0.00185156	0.00165625	0.0016875	0.00159375	0.00353125	0.00340625	0.00301563	0.00310938
VP4	847	T	C	24	I>T		0.00105469	0.00128125	0.00121875	0.00172656	0.00142578	0.00137109	0.00132813	0.0011875	0.00209375	0.00185156	0.00199219	0.00191406	0.00189062	0.001875	0.00222656	0.00222656	0.00303906	0.00283594	0.00184766	0.00207813
VP4	848	T	A	24	synonymous>I													0.00119141
VP4	848	T	C	24	synonymous>I		0.00120703		0.00153906	0.00135937				0.00199219	0.00149219	0.0019375	0.00378906	0.00257031	0.0033125	0.00302344	0.00133594	0.002	0.00171875	0.00165625	0.00157813
VP4	850	A	G	25	H>R		0.00104297	0.00116406	0.00205469	0.00191406	0.00160938	0.00213281	0.00182812	0.00117188	0.003625	0.00305469	0.00390625	0.00299219	0.00342187	0.00157031	0.00159375	0.00164844	0.00409375	0.00246094	0.00200391	0.00189062
VP4	851	C	A	25	H>Q												0.00128125		0.00107812	0.00164062	0.00153125	0.0025	0.00253125	0.00128125	0.00192578
VP4	851	C	T	25	synonymous>H		0.00114062		0.00133984	0.00100781		0.00154687	0.00205469		0.0019375	0.0028125	0.00382031	0.00201172	0.00276563	0.00328125	0.00392187	0.00529687	0.00579687	0.00453125	0.0044375	0.00315625
VP4	852	T	A	26	Y>N																			0.00126953	0.00328125
VP4	852	T	C	26	Y>H		0.00323438	0.00130078	0.00200781	0.00121484	0.0018125	0.00224219	0.00160938	0.00146875	0.00196875	0.00241797	0.00259375	0.0019375	0.00229687	0.00185156	0.00194531	0.00163672	0.00398437	0.00373437	0.00283203	0.00148437
VP4	853	A	G	26	Y>C		0.00153125		0.00167188	0.00110156	0.00135156	0.00136719	0.00146875	0.00108594	0.00110156	0.00130469	0.00228125	0.0028125	0.00226562		0.001375	0.00285937	0.00247656	0.00207031	0.00195703
VP4	854	C	T	26	synonymous>Y		0.00120312	0.00220313	0.00114844	0.0031875	0.00176562	0.0011875		0.00120703	0.00182812	0.00503125	0.00401562	0.0026875	0.00503125	0.00334375	0.00132813	0.0849507	0.106209	0.128824	0.0715872	0.0263158
VP4	855	A	G	27	T>A		0.00191406	0.00151172	0.00239844	0.00119141	0.0025625	0.00196875	0.00257031	0.00164062	0.00225	0.00278125	0.001875	0.00275781	0.00264062	0.00114062	0.0015	0.0019375	0.0023125	0.0015625	0.00171875	0.00135937
VP4	856	C	T	27	T>I																		0.00126563
VP4	857	A	G	27	synonymous>T		0.00113672	0.00140625	0.00275781		0.00130469	0.00175781	0.00261719		0.0016875	0.00378125	0.00425	0.00357813	0.00380469	0.00292188	0.00176562	0.0025	0.00397656	0.0028125	0.00155859
VP4	858	A	G	28	N>D		0.00248437	0.001875	0.002375		0.00136719	0.00111719	0.00178125	0.00110156	0.00263281	0.00217969	0.00285937	0.00340625	0.0028125	0.00175	0.00155469	0.00236719	0.003625	0.00220313	0.00171094
VP4	859	A	G	28	N>S		0.00155078		0.00134766				0.00208594		0.00100391	0.00291016	0.00282031	0.00273437		0.00119531	0.00332812	0.005375	0.0113487	0.00828125	0.00520313	0.00305469
VP4	860	T	C	28	synonymous>N		0.00209375	0.00150781	0.0015625	0.00148437	0.00132813	0.00160938	0.00110156		0.00175	0.00232813	0.00391406	0.00350781	0.00246094	0.00132813			0.00101562		0.00148437	0.00175
VP4	861	A	G	29	I>V												0.00117188			0.00105469				0.00116406
VP4	863	T	C	29	synonymous>I			0.00126563	0.00115625	0.0010625	0.00117188		0.00142969		0.0015	0.00129687	0.00127344	0.0011875	0.00146875	0.00176562						0.00111719
VP4	866	T	C	30	synonymous>N		0.00108594	0.00114062					0.00121875			0.00115625		0.00147656	0.00116797		0.00114062	0.00127344	0.00184375	0.00126563	0.00125781
VP4	867	T	C	31	Y>H		0.00228125	0.056764	0.0241776	0.0401521	0.0329359	0.0244655	0.013014	0.0115543	0.00532812	0.00213281	0.00137891	0.00131641	0.00410938		0.00158594	0.004125	0.00513281	0.007875	0.00434375	0.00294531
VP4	869	T	C	31	synonymous>Y		0.00178125		0.00135156		0.0014375		0.00142187	0.00242188	0.00303125	0.00357813	0.00552344	0.00710938	0.00657813	0.00539062	0.0045	0.00853125	0.0214638	0.0271382	0.0308799	0.0336349
VP4	870	T	A	32	Y>N			0.0284745	0.0110197	0.0227796	0.0186883	0.0113692	0.0059375	0.00360938	0.00153125				0.00146484
VP4	870	T	C	32	Y>H															0.00106641			0.00142187
VP4	871	A	G	32	Y>C				0.0011875			0.00114062		0.00135937									0.0011875	0.00104688	0.00117188
VP4	872	C	T	32	synonymous>Y			0.00165625	0.00124609							0.0015	0.002375	0.0016875	0.00158594	0.00210938		0.00124219	0.00171094	0.0020625	0.00115234	0.00114062
VP4	873	A	G	33	K>E		0.00196094		0.00107031							0.00107422	0.0015	0.00209375	0.00133594		0.00140625				0.00141406
VP4	874	A	G	33	K>R		0.00403125	0.00253906	0.0035625	0.00144531	0.0018125	0.00192969	0.00185938	0.0028125	0.002125	0.00333594	0.00351562	0.00450781	0.00374219	0.001125	0.00135937	0.002125	0.0024375	0.00273437	0.00217187	0.00194531
VP4	877	A	G	34	D>G														0.00101562	0.00100781			0.00121875
VP4	878	T	C	34	synonymous>D					0.0010625		0.00125				0.0018125		0.00111328	0.00166406	0.00314063	0.00140625				0.00116406
VP4	881	C	T	35	synonymous>A			0.00102734	0.00311719	0.00220313	0.00375781	0.00392969	0.00432813	0.0044375	0.00507812	0.00403125	0.00420312	0.00408594	0.00729688	0.00240625	0.0116365	0.0442434	0.160547	0.270199	0.346834	0.38382
VP4	882	G	A	36	A>T																		0.00116016		0.00101953
VP4	884	A	G	36	synonymous>A		0.00128125		0.00113281	0.0015625			0.001125	0.0018125		0.00135937	0.00165625	0.00164062	0.001625	0.002375	0.00233594	0.00100781	0.00127344	0.001625	0.00129687	0.00126563
VP4	885	T	C	37	S>P		0.00167188		0.00110547	0.00103125	0.00104688	0.001875	0.00114844	0.00127344	0.00175	0.00159375	0.00109375	0.00142187	0.00185938	0.001875	0.00182812	0.0015	0.00196875	0.00182031	0.00207813
VP4	887	C	T	37	synonymous>S										0.00102344	0.00108203				0.00109375
VP4	889	A	G	38	N>S		0.00125			0.00122266				0.00165625				0.00136328	0.001375	0.00122656			0.00175781		0.00103516	0.00124609
VP4	890	C	T	38	synonymous>N									0.00110156				0.00113281
VP4	891	T	C	39	S>P		0.00107031					0.00125	0.001375		0.00164062	0.00102344	0.00109375				0.002375		0.00127344	0.00101953	0.00108203
VP4	893	A	G	39	synonymous>S		0.00148437			0.00103906		0.00103906				0.00126563	0.0010625	0.00157031	0.00153125	0.00234375	0.00165625		0.00125391		0.00134375	0.00110938
VP4	894	G	A	40	A>T														0.00111719
VP4	898	A	G	41	N>S		0.0011875											0.00145313					0.00110547
VP4	899	T	C	41	synonymous>N										0.00111719		0.00128125			0.00170312
VP4	902	G	A	42	synonymous>R														0.00122266	0.00155469	0.00285937	0.00321875	0.00217969	0.00167188	0.00157422	0.00117969
VP4	904	A	G	43	Q>R		0.00102344	0.00147656	0.00146484	0.00146875		0.00111719	0.001375	0.00227344		0.00124609	0.00136328	0.00162109	0.00157031	0.00153125	0.00120312	0.00170312	0.00210156		0.00171875
VP4	907	A	G	44	D>G			0.001125		0.00103906	0.00135156	0.00138281		0.00114062			0.001125	0.001875	0.00175		0.00136719		0.00107812	0.001375
VP4	908	T	C	44	synonymous>D		0.0011875	0.00165625	0.00203125	0.00265625	0.00327344	0.00309375	0.0031875	0.00332812	0.00332812	0.00280469	0.002625	0.00219531	0.001875	0.00275	0.00227344	0.00185938	0.002	0.0019375	0.00167578
VP4	909	T	C	45	F>L							0.0010625	0.00122266		0.00147656				0.00142969	0.00132813			0.00101562
VP4	910	T	C	45	F>S		0.00153125	0.00130469	0.00147656	0.00217187	0.00152734	0.00147656	0.00219531	0.00217187	0.00121875	0.00199609	0.00189062	0.0019375	0.00178125	0.00145313	0.00123438	0.00191406	0.001875	0.00129687	0.00204687	0.00179688
VP4	911	C	T	45	synonymous>F															0.00140625
VP4	912	A	G	46	T>A		0.00103906			0.00116406				0.00171875	0.00163281		0.00121094	0.00112891	0.00203125	0.00271875			0.00183594	0.0010625	0.0018125
VP4	914	T	C	46	synonymous>T		0.00195312	0.00116016	0.00138281	0.00153125	0.00137891	0.00205469	0.00278906	0.00185938	0.00189062	0.00198438	0.00272656	0.00290625	0.0025625	0.00215625	0.0018125	0.0021875	0.00225	0.00195312	0.0041875	0.00176562
VP4	916	A	G	47	Q>R									0.00119531					0.00139063					0.0011875
VP4	917	A	G	47	synonymous>Q		0.00213281	0.00115625	0.00109375	0.00166406	0.00276563	0.00251562	0.00180469	0.00178125	0.00228125	0.00267969	0.00346875	0.00367187	0.00267188	0.00245313		0.00153906	0.00149219	0.00179688	0.00146094	0.00175781
VP4	919	A	G	48	D>G	0.00153906	0.001375	0.00115625		0.00155078	0.00128125	0.00173438	0.0018125	0.00225	0.00182031	0.00179688	0.00135937	0.00160938	0.0018125	0.00201562	0.001375	0.00139063	0.00275781	0.00132031	0.00123438	0.001375
VP4	920	C	T	48	synonymous>D										0.00197656		0.0013125	0.00140625		0.00245313	0.00109375
VP4	923	G	A	49	synonymous>P		0.00104688						0.00136719	0.00110938	0.00146094			0.00108594	0.00159375	0.00116016		0.00260156	0.00115625	0.00204687	0.00271875	0.00145313
VP4	926	C	T	50	synonymous>G														0.00128125	0.00155469
VP4	927	A	G	51	K>E																			0.00100781
VP4	928	A	G	51	K>R		0.00135937	0.00120703	0.00142969	0.0019375	0.00119922	0.00191406	0.00166406	0.00115625			0.00225	0.001875	0.00185156	0.00104688	0.001625	0.00121875	0.0018125	0.00139844	0.00175391
VP4	930	T	C	52	F>L				0.00147656		0.00119531	0.00148437	0.0018125		0.00225781	0.00140625	0.0025625	0.00290625	0.00195312	0.00225	0.00183594	0.00182812	0.00280469	0.002	0.00184375	0.00108594
VP4	931	T	C	52	F>S		0.00146094	0.00178125	0.00196875	0.0014375	0.0014375	0.00149609	0.00203906	0.00214062	0.00124219	0.001625	0.00301563	0.00307031	0.00234375	0.00135937	0.001625	0.00219531	0.00251562	0.00203906	0.00198438	0.0011875
VP4	933	A	G	53	T>A	0.00155469	0.00157813	0.00192969	0.00186719	0.0019375	0.00169531	0.00171094	0.00275	0.00246875		0.00164453	0.00200781	0.00428125	0.00252344	0.00310938	0.00142187	0.00196094	0.00228906	0.00147656	0.00126172	0.001625
VP4	935	A	G	53	synonymous>T		0.00127344	0.00104688	0.00145313	0.00123438	0.002125	0.00111719	0.00167969	0.00102344		0.00180469	0.00135937	0.0021875	0.00258594	0.002375	0.00295312	0.0018125	0.00139844	0.0024375	0.00146484	0.00126563
VP4	936	G	C	54	E>Q										0.00149219	0.00112109	0.00258594	0.00401562
VP4	937	A	G	54	E>G		0.00139844		0.001875			0.00114062	0.00133594	0.00125	0.00124219	0.00140625	0.00103906	0.00235937	0.00266406	0.00152344	0.00178125			0.00107812		0.001625
VP4	938	A	G	54	synonymous>E	0.00148437	0.00159375	0.0015625	0.00259375	0.002125	0.00164844	0.00205469	0.00172656	0.00325	0.00284375	0.00190234	0.003375	0.002875	0.00253906	0.00271875	0.003625	0.00276563	0.00267969	0.00221094	0.00173828	0.00210938
VP4	941	A	C	55	synonymous>P			0.00142969	0.00189844	0.00146094	0.00242188	0.0018125	0.00228125	0.00108594	0.00128125	0.00148437	0.00139063
VP4	941	A	G	55	synonymous>P		0.00198438		0.00146875	0.00101953	0.00115234	0.00147656	0.00134375		0.00125	0.00170703		0.00133594	0.00126563	0.00135937		0.00120312	0.00146094
VP4	943	T	C	56	V>A								0.00104688		0.00196094		0.00125	0.00160938	0.00205469	0.00107812	0.00165625	0.00203125	0.00165625	0.001125	0.00129687
VP4	945	A	G	57	K>E		0.001875				0.00108203	0.00173047	0.00114062	0.0011875		0.00174219	0.00192969	0.00170312	0.00125	0.00161719			0.00174219		0.00109375	0.00132031
VP4	947	A	G	57	synonymous>K	0.00171094	0.00210156	0.00246875	0.00324219	0.00257813	0.00279688	0.00239844	0.00371875	0.0026875	0.00291406	0.00359375	0.00260156	0.00392187	0.00329687	0.00309375	0.00246875	0.00242969	0.00370313	0.00182812	0.00223438	0.00165625
VP4	949	A	G	58	D>G	0.001125	0.00294531	0.00217187	0.00260937	0.00150781	0.00189844	0.002625	0.00166406	0.00165625	0.00253125	0.00143359	0.00226562	0.00404688	0.00280469	0.00259375	0.00195312	0.0025625	0.002125	0.0016875	0.00139063	0.00232813
VP4	950	T	C	58	synonymous>D		0.00175781		0.00146875	0.00135937	0.0010625	0.00141406	0.001375	0.00169531	0.00189844	0.00161719	0.00292969	0.00353906	0.00340625	0.00223438	0.0028125	0.00278906	0.00439062	0.00301563	0.0021875	0.00270312
VP4	951	A	G	59	I>V		0.00197656	0.00157031	0.00202344	0.00135547	0.00141406	0.00160938	0.00232031	0.00196875	0.00170312	0.00155469	0.00307031	0.00357031	0.00271875	0.00127344	0.00178125	0.003	0.003625	0.00185156	0.00240234	0.0028125
VP4	952	T	C	59	I>T		0.0021875			0.00121875	0.00111719	0.00153516		0.0011875		0.00178906	0.0019375	0.00409375	0.00120312	0.00139063	0.00175781	0.00192188	0.00209375	0.00179688	0.00225781	0.00161719
VP4	953	C	T	59	synonymous>I		0.00109375				0.00146875		0.00103125	0.00111719	0.00152344	0.00270312	0.00451563	0.00565625	0.00504688	0.00290625	0.005375	0.00817188	0.012315	0.00525781	0.0029375	0.0026875
VP4	954	A	G	60	M>V		0.0021875	0.00158594	0.00207813		0.00196094	0.00144141	0.00132813		0.00108594	0.00192188	0.00479688	0.00415625	0.00345313		0.00129687	0.00178906	0.00305469	0.00219531	0.00157813
VP4	955	T	C	60	M>T		0.00235156		0.00181641			0.00107812				0.00158203	0.00161719	0.0050625	0.00203125		0.00136719		0.0023125
VP4	956	G	A	60	M>I			0.00346094	0.00351562	0.005875	0.0045625	0.0085	0.0138158	0.00692187	0.00359375				0.00426563		0.0028125			0.0018125
VP4	957	A	G	61	I>V		0.00148437	0.00148828	0.00186719			0.00221094	0.00211719	0.00167969	0.00214844	0.00276563	0.0034375	0.00601562	0.0040625	0.0030625	0.0016875		0.00189062	0.00125	0.001125	0.00103125
VP4	958	T	C	61	I>T							0.00126563	0.00538281	0.00125	0.00234375		0.00207031	0.00273437	0.00153906	0.00101562
VP4	959	T	C	61	synonymous>I												0.0021875	0.0016875		0.001125
VP4	962	A	G	62	synonymous>K										0.00183594	0.00209375	0.00440625	0.005	0.0025	0.00146875
VP4	963	T	C	63	S>P		0.00116406					0.00158594						0.00148437	0.00116406	0.00108594		0.00103125	0.0019375	0.00145313
VP4	965	A	G	63	synonymous>S			0.00176562		0.00115625			0.00165625	0.0015	0.00167188	0.00142187	0.00111719	0.00164062	0.00133594	0.00158594		0.00223438	0.00205469		0.00129687
VP4	966	C	T	64	synonymous>L	0.00485156	0.003375	0.0504112	0.0305099	0.0437911	0.0377056	0.0478618	0.0811678	0.0206414	0.013014	0.00625	0.00525	0.0120683	0.0256579	0.00266406	0.0328125	0.0089375	0.0157689	0.0159128	0.0117599	0.0141653
VP4	967	T	A	64	L>Q	0.00284375	0.00190625	0.0345395	0.0203331	0.0315378	0.0285567	0.0391653	0.0599507	0.0156661	0.0086875	0.00320312	0.00214062	0.00709375	0.0168997	0.00121875	0.0184005	0.00451563	0.00785938	0.00770313	0.00458594	0.00446875
VP4	967	T	C	64	L>P							0.00125781								0.0016875	0.00145313		0.00155469		0.00120703
VP4	968	A	G	64	synonymous>L		0.00113672	0.00107812	0.003125	0.00376562	0.00313281	0.00551562	0.00439062	0.00521875	0.004625	0.00290625	0.0021875	0.00373437	0.004625		0.00241406	0.00124219	0.00111719		0.00101562	0.00104688
VP4	970	C	T	65	P>L													0.00142187
VP4	971	A	G	65	synonymous>P		0.0014375	0.00142969	0.00194531		0.0011875	0.00148437	0.00254688	0.00135937	0.00140625	0.00142187	0.00146875	0.0018125	0.001625		0.0014375	0.00179688	0.00185938		0.0013125
VP4	972	G	A	66	A>T												0.00112109
VP4	974	T	C	66	synonymous>A		0.0024375	0.002	0.00169531	0.00240625	0.00178125	0.00261719	0.00246875	0.00270312	0.0023125	0.00296094	0.00253125	0.00290625	0.0045625	0.00309375	0.00325	0.0029375	0.00260156	0.00299219	0.00198438	0.00273437
VP4	976	T	C	67	L>P	0.00119141	0.00133203	0.00207031	0.00139844	0.00174219	0.00123828	0.00201562	0.0016875	0.0019375	0.00228125	0.00176172	0.0029375	0.00226562	0.00255469	0.00235937	0.00245313	0.00229687	0.00213281	0.00253125	0.00205469	0.0015
VP4	977	C	T	67	synonymous>L													0.0010625
VP4	978	A	G	68	N>D									0.00107812			0.001125		0.00151563	0.00111719		0.00132031	0.00121875
VP4	979	A	G	68	N>S							0.00109375							0.00164844	0.00127344					0.00132422
VP2	981	T	C	1	S>P		0.00189062	0.00196875	0.00265625	0.001875	0.00225781	0.00176562	0.00207813	0.00203125	0.00309375	0.00221094	0.00129687	0.00246094	0.00148437	0.00252344	0.00207813	0.0024375	0.00232031	0.0025625	0.00280469	0.00225
VP2	983	C	T	1	synonymous>S														0.00101562
VP2	986	C	T	2	synonymous>P									0.00170312		0.00117188	0.00138281	0.00141406	0.00123438	0.00235937			0.00124219		0.00133594
VP2	987	A	G	3	T>A				0.00136328				0.00117969	0.00198438	0.00107031			0.00175	0.00151563				0.001125
VP2	989	A	G	3	synonymous>T		0.00176562	0.00147656	0.00104688		0.00135937	0.00114844		0.00164844	0.0015625	0.00187891	0.00240625	0.00303125	0.00166406	0.00264062	0.0015	0.00140625	0.00229687	0.001625	0.00126563
VP2	992	A	G	4	synonymous>V		0.00220313	0.0016875	0.0018125	0.00126563	0.00223438		0.00163281	0.00214062	0.00127344	0.00225781	0.0031875	0.003875	0.002625	0.00202344	0.00100781	0.00120312	0.00217187	0.001875	0.00133984	0.00147656
VP2	994	A	G	5	E>G	0.00103125	0.00226562	0.0020625	0.00159766	0.00126563	0.00196875	0.00164844	0.003125		0.00171875	0.00192188	0.00223438	0.00242969	0.0024375	0.00239844	0.00266406	0.00161719	0.00245313	0.00267188	0.00279688	0.00140625
VP2	997	A	G	6	E>G		0.00113281	0.00122656		0.00120312	0.00160938	0.00139063	0.00138281	0.00203125	0.00176562	0.00121875	0.00196094	0.00234375	0.001625	0.00146094	0.00229687	0.00157031	0.00215625	0.00119531	0.00183594	0.00113281
VP2	999	T	C	7	C>R							0.00101562											0.00128906	0.00126563
VP2	1001	C	T	7	synonymous>C									0.00167969	0.001125		0.00103906	0.00266406	0.00185156	0.00125	0.00177344		0.00139844		0.00169531	0.00146875
VP2	1002	G	A	8	G>R																0.00105469
VP2	1004	A	G	8	synonymous>G		0.00114062	0.00112891	0.00242188	0.00301563	0.00251562	0.00436719	0.00514062	0.00467187	0.00440625	0.00296875	0.00247656	0.00323438	0.00357813	0.001875	0.00123438		0.00120312		0.00184375	0.00142187
VP2	1004	A	T	8	synonymous>G					0.00123438		0.00121875		0.00122656		0.00113672		0.00116406	0.00240625		0.00108594
VP2	1005	T	C	9	Y>H										0.0016875			0.001125	0.0013125					0.00225
VP2	1006	A	G	9	Y>C									0.0011875		0.00107031			0.001125	0.00103906	0.00117969
VP2	1007	C	T	9	synonymous>Y								0.00128125			0.0011875	0.00251562	0.00196875	0.00314063	0.00110547	0.0365132	0.0516447	0.0716283	0.0489309	0.033347	0.0302632
VP2	1008	A	G	10	S>G		0.00142187	0.00140625	0.00163281	0.0010625		0.00132813		0.00189062		0.00133984	0.00100781	0.0024375	0.00184375	0.00119531	0.00121875		0.00146875		0.00151563	0.00128125
VP2	1010	T	C	10	synonymous>S		0.00190625	0.00103125	0.00153125		0.00125	0.00130469	0.00310938	0.003375	0.00234375	0.0020625	0.00174219	0.00349219	0.00340625	0.00682813	0.00263281	0.00129687	0.00278906	0.00270312	0.0031875	0.00296875
VP2	1012	A	G	11	D>G	0.00115625	0.00158594	0.00145313	0.0020625	0.00170312	0.00123438	0.00171875	0.0015625	0.00107031	0.00189062	0.00130078	0.00120312	0.00225	0.00209375	0.00200781	0.00201562		0.00225781	0.00182812	0.00157813	0.00157031
VP2	1013	C	T	11	synonymous>D								0.00104688		0.00196875	0.00225781	0.005125	0.00660938	0.0035625	0.00127734				0.00101172
VP2	1014	A	G	12	R>G		0.00196875	0.00203125	0.0018125	0.00195312	0.00143359	0.00282031	0.00139844	0.001875	0.0024375	0.0019375	0.0019375	0.00232813	0.00225781		0.00127344	0.00245313	0.002375	0.00210156	0.00175	0.00200781
VP2	1017	G	A	13	A>T														0.00111719
VP2	1018	C	T	13	A>V														0.00128906
VP2	1020	A	G	14	R>G		0.00151563	0.00155469	0.00139844	0.00103125	0.00159375	0.00160938	0.00196875	0.00177344	0.00132031	0.00154687	0.00145313	0.00136719	0.00190625	0.00117188	0.0026875	0.00160938	0.002875		0.00210938	0.00210938
VP2	1022	A	G	14	synonymous>R		0.00158594		0.00104688	0.00164062	0.00153125		0.00251562	0.0014375	0.00174219	0.00159375	0.00172656	0.00273437	0.00196094	0.00189844	0.00153906		0.00279688	0.00164844	0.001875	0.00171875
VP2	1023	T	C	15	S>P		0.00103125		0.00128906			0.00165625			0.00125			0.00105469	0.00173438	0.00176562	0.00124219	0.001375	0.00159375	0.00133594	0.00128125
VP2	1025	A	G	15	synonymous>S		0.00102344	0.00135937	0.00122656	0.00160938	0.00154687	0.00147656	0.00113281	0.0020625	0.0025625	0.00139844	0.00203125	0.00165625	0.00113281	0.00148437		0.0019375	0.00142187	0.00107812	0.00101562
VP2	1026	A	G	16	I>V		0.00126563							0.00132813			0.00127344	0.00121875	0.00146875	0.001125			0.002125
VP2	1027	T	C	16	I>T									0.00110156	0.00170312		0.00154687		0.00167969	0.00115625	0.00176562	0.00104688	0.00157031
VP2	1028	C	T	16	synonymous>I										0.00186719		0.00109375	0.00227344
VP2	1029	A	G	17	T>A			0.00104688	0.00134375			0.00110938		0.00114062		0.00126953				0.00129687				0.00141406	0.00113672
VP2	1030	C	T	17	T>I							0.0010625
VP2	1031	A	G	17	synonymous>T		0.00246094		0.00229687	0.00115625	0.00110938	0.00177344	0.0014375	0.00128125	0.00195312	0.0020625	0.00389062	0.00635938	0.003375	0.00150781	0.00185938	0.00101562	0.00190625	0.00146094	0.00107812	0.00100781
VP2	1032	T	C	18	synonymous>L		0.00303906	0.00128906	0.00178906	0.00107812		0.00157813	0.00246875	0.00255469		0.00219141	0.00528125	0.00402344	0.00226562	0.00139063	0.002125	0.00123438	0.00303906	0.00154687	0.00138281
VP2	1033	T	C	18	L>S												0.00225	0.00135156	0.0013125		0.00132031		0.00115625
VP2	1034	A	G	18	synonymous>L	0.00141406	0.00434375	0.0031875	0.003	0.00242188	0.00279688	0.00228906	0.00152344	0.00246875	0.00253125	0.00432031	0.00659375	0.0100946	0.0040625	0.002125	0.00103125	0.00214844	0.00242188	0.00221094	0.00123438	0.00115625
VP2	1037	T	C	19	synonymous>G		0.00198438	0.00132031	0.00124219	0.001625	0.001125	0.00138281	0.00207813	0.001875	0.00230469	0.00223438	0.00175781	0.00246875	0.00251562	0.002875	0.00117188	0.00153125	0.00290625	0.00157813	0.00143359	0.00154687
VP2	1038	A	G	20	N>D													0.00116406
VP2	1039	A	G	20	N>S							0.00114844						0.00128125					0.00121094	0.00115625	0.00110938
VP2	1040	C	T	20	synonymous>N													0.00173438
VP2	1041	T	C	21	S>P	0.00103906	0.00279688	0.00215625	0.00165625	0.00167969	0.0011875	0.00260937	0.00178125	0.00265625	0.00179688	0.00215625	0.00214062	0.00278125	0.00303125	0.00248437	0.00290625	0.00228125	0.00275	0.0018125	0.00241406	0.0023125
VP2	1043	C	T	21	synonymous>S															0.00178906
VP2	1044	A	G	22	T>A								0.001375	0.0014375	0.00157031	0.00133203	0.00133594	0.00152344	0.00166406	0.00139063	0.00189062	0.00117969	0.00117969	0.00117969
VP2	1045	C	T	22	T>I			0.0099301	0.00464062	0.00825	0.00820312	0.0079375	0.0138569	0.00442187	0.00189844				0.00239844			0.001875	0.00107031	0.00221875
VP2	1046	C	T	22	synonymous>T										0.00103125		0.001125				0.00161719	0.00109375	0.00108594
VP2	1047	A	G	23	I>V				0.00110938								0.00103906		0.0010625	0.00116406				0.00124219	0.0014375
VP2	1048	T	C	23	I>T																0.00109375
VP2	1049	A	G	23	I>M			0.00103125							0.00109375			0.00125					0.00105469
VP2	1050	A	G	24	T>A					0.00120312	0.0010625	0.00124219	0.00128125	0.00151563				0.00134375	0.00146094	0.00121094	0.00160156			0.00142969
VP2	1052	G	A	24	synonymous>T			0.00202344	0.00152344	0.00154687	0.00165625	0.0015	0.00182812								0.00138281	0.001125	0.001125
VP2	1053	A	G	25	T>A								0.00155469					0.00159375	0.00128125				0.00110938
VP2	1055	T	C	25	synonymous>T		0.00242188	0.00130469	0.00121875	0.0013125	0.001375	0.00235156	0.00129687	0.00196875	0.002125	0.00257813	0.00303125	0.00246875	0.00192188	0.00275	0.00208594	0.00115625	0.00204687	0.00110156	0.00149219
VP2	1057	A	G	26	Q>R		0.00171875	0.00114844	0.00146484	0.0011875	0.00116406	0.00113281		0.00100781	0.00110156	0.00121875	0.00182812	0.00135156	0.00215625		0.0015625	0.00185156	0.001625	0.00269531	0.00182812	0.00177344
VP2	1060	A	G	27	E>G							0.00146875	0.00104688			0.00113281		0.0015625	0.00159375	0.00154687	0.00132031		0.00103906	0.00165625	0.001875
VP2	1061	A	G	27	synonymous>E				0.00182812	0.00128125	0.00100391	0.00101562		0.0019375	0.00221875	0.00132813	0.0014375	0.00201562	0.00251562	0.002375	0.00108594		0.00142187		0.00109375
VP2	1064	C	T	28	synonymous>C					0.0010625		0.00103125		0.00140625		0.00162891		0.0013125	0.0010625	0.00107031	0.00166406		0.00115625
VP2	1065	G	A	29	A>T								0.00121094
VP2	1067	C	T	29	synonymous>A															0.00160938
VP2	1068	A	G	30	N>D										0.00144531			0.00157813	0.00132031			0.001375
VP2	1070	C	T	30	synonymous>N									0.001375		0.00100391	0.00142187	0.00199219	0.00160938	0.00101172	0.00165625	0.00122656	0.00152344	0.00199219	0.0016875	0.00124219
VP2	1072	T	C	31	V>A		0.00139063			0.00126563	0.00128125	0.00111719		0.00132813		0.00107812		0.00145313	0.00171094	0.001125		0.00108594	0.00132813	0.00125	0.00114844
VP2	1073	G	A	31	synonymous>V										0.00132031	0.00147656	0.00370313	0.00376562	0.0026875
VP2	1075	T	C	32	V>A		0.001375	0.00124219	0.00121875	0.001375		0.00136328	0.00165625	0.0023125	0.00116406	0.00149609	0.00136719	0.00154687	0.00117969		0.00170312		0.00197656	0.00107031	0.00140625	0.00125
VP2	1078	T	C	33	V>A				0.00100781		0.00123438	0.00178906		0.00171875	0.001375		0.00178906	0.00177344		0.001375	0.00160938	0.00153125	0.00164062	0.00142187	0.00122656
VP2	1079	G	A	33	synonymous>V																	0.00103125
VP2	1082	C	T	34	synonymous>G													0.00126563		0.00123438
VP2	1083	T	C	35	Y>H		0.00130469	0.00123438	0.0014375			0.00128906			0.00129687	0.00148437		0.00265625	0.00157813	0.00115625	0.00182812	0.0015	0.00145313	0.00117969	0.0015	0.00120312
VP2	1084	A	G	35	Y>C												0.0013125	0.00210938				0.00124219	0.00116406	0.00117188	0.00103516
VP2	1085	T	C	35	synonymous>Y		0.00214844		0.00146875					0.00236719	0.0015625	0.002	0.00169531	0.00315625	0.0016875	0.00225	0.00132031	0.0014375	0.00207813	0.00225781	0.00175
VP2	1088	A	G	36	synonymous>G	0.00135156	0.001625	0.00177344	0.002625	0.00138281	0.00196094	0.00220313	0.00244531	0.00221875	0.00311719	0.00260156	0.00238281	0.00386719	0.0024375	0.00292969	0.00246875	0.00214062	0.00228906	0.00284375	0.00157422	0.00191406
VP2	1089	G	A	37	V>I												0.00127344	0.00117188
VP2	1090	T	C	37	V>A		0.00107031	0.001125	0.00132813			0.00152344	0.00107031		0.0014375	0.00167969	0.00115625	0.00149219	0.00234375		0.00130469		0.00185938	0.00175
VP2	1091	A	G	37	synonymous>V	0.00104688	0.00184375	0.00264062	0.0029375	0.00186719	0.00301563	0.00282812	0.002625	0.00235937	0.00159375	0.00324219	0.0053125	0.00673437	0.00396875	0.00291406	0.00228906	0.00170312	0.00184375	0.00171875	0.00106641
VP2	1092	T	C	38	W>R		0.00166406		0.00175781	0.00135937		0.00130859	0.00109375	0.00128906	0.00164844	0.00162891	0.00159375	0.00202344	0.00199219	0.00114062	0.00117969	0.0013125	0.0015625	0.00192188	0.00207813	0.00104688
VP2	1097	A	G	39	synonymous>P				0.0010625		0.00117969	0.00107812	0.00123438	0.0018125	0.00173438	0.00115625	0.00309375	0.002	0.00188281	0.00128125	0.0015		0.00175781	0.00160938
VP2	1099	A	G	40	D>G											0.00117969	0.00134375	0.00198438		0.00121875					0.00139453
VP2	1100	T	C	40	synonymous>D							0.00114453				0.00134375	0.00210156	0.0023125	0.001125	0.00186719	0.00138281	0.00110156		0.00140625	0.00110156
VP2	1101	T	C	41	Y>H												0.00138281			0.00103125
VP2	1102	A	G	41	Y>C													0.00122656
VP2	1103	T	C	41	synonymous>Y		0.00101172							0.00151563	0.00140625	0.00120703	0.00151563	0.002125	0.00164062	0.00203125	0.00155469		0.00189062		0.00146875
VP2	1104	C	T	42	synonymous>L				0.00307812	0.00255469	0.00267188	0.00214844	0.00246875	0.00273437		0.00209375	0.00325	0.00459375	0.00209375	0.0044375
VP2	1105	T	C	42	L>P		0.00151563		0.00125					0.00133594		0.00126953	0.00297656	0.00228125	0.00166406		0.00178125		0.00198438	0.00192188	0.00107812
VP2	1106	A	G	42	synonymous>L			0.00153906	0.0023125		0.00110938	0.00121094	0.00159375		0.002	0.00252344	0.00525	0.007625	0.00378125	0.00125	0.00119531	0.00170312	0.00389062	0.00128125	0.00105859
VP2	1106	A	T	42	synonymous>L								0.00117969
VP2	1107	A	G	43	K>E		0.00285937	0.00325	0.00238281	0.00145313	0.00134375	0.00226562	0.00228125	0.00159375	0.00191406	0.00299219	0.00571875	0.00740625	0.0053125	0.00135937	0.00172656	0.00196875	0.00453125	0.0029375	0.00235937
VP2	1108	A	G	43	K>R		0.00407813	0.00398437	0.00564063	0.00178125	0.00214062	0.00358594	0.002875	0.00264844	0.00428125	0.0071875	0.00921053	0.0113076	0.00704688	0.0041875	0.00403125	0.00260156	0.0084375	0.005375	0.00367187	0.00185156
VP2	1109	G	A	43	synonymous>K												0.00126563	0.00150781	0.00414062		0.00760937	0.0103618	0.0124178	0.00659375	0.00310938	0.00265625
VP2	1111	A	G	44	D>G		0.00132813	0.00153906	0.00107812	0.001125		0.00116016	0.0010625		0.0015625	0.00175	0.00210156	0.00194531	0.00185938	0.00110156	0.00109375	0.00179688	0.00217187	0.0015	0.00163281	0.00105469
VP2	1112	T	C	44	synonymous>D		0.001625							0.00114844	0.00145313	0.0010625	0.001375	0.00264062	0.00334375	0.00308594	0.00113281		0.0019375		0.00110938	0.00132813
VP2	1113	A	G	45	S>G	0.00103125	0.00169531	0.00167969	0.00178125	0.00192188	0.00129687	0.00209375	0.0025625	0.00203906	0.00282812	0.00205469	0.0035	0.00584375	0.00283594	0.00204687	0.00204687	0.00296875	0.00323438	0.00201562	0.00288281	0.00278906
VP2	1115	T	C	45	synonymous>S	0.00105469	0.00100781				0.0013125	0.00190625	0.00121875	0.00148437	0.001125	0.00139063	0.00185156	0.00171094	0.00170312	0.00174219	0.00176562	0.00128906	0.00198438	0.00128125
VP2	1117	A	G	46	E>G	0.00105078	0.00234375	0.00239062	0.00158594	0.00192969	0.00122656	0.00157031	0.00201562	0.00165625	0.00234375	0.00236719	0.00323438	0.00207813	0.00290625	0.0016875	0.00179688	0.00228125	0.00197656	0.0025	0.00251562	0.00159375
VP2	1121	A	G	47	synonymous>A		0.00189062	0.00134375	0.00144531	0.00144531	0.00157813	0.00135937	0.00111719	0.00126563	0.00114844	0.00190234	0.00144531	0.003	0.00232813	0.00109375	0.00203125		0.00132031	0.00134375	0.00175781	0.001625
VP2	1122	A	G	48	T>A				0.00125				0.0020625	0.00128125		0.00105859	0.00103125	0.00122656	0.00125	0.00137109		0.0010625	0.00108984		0.00139844
VP2	1124	A	G	48	synonymous>T		0.00219531	0.00132031	0.00177344	0.00155469		0.00173438	0.00113281	0.002		0.00185938	0.00174219	0.00146875	0.00234375	0.00165625	0.00182812	0.00120312	0.00199219	0.00160938	0.00134375	0.00128125
VP2	1127	A	G	49	synonymous>A		0.00124609		0.0015625		0.00152344	0.00151563	0.0016875	0.00204687		0.00205469	0.00317187	0.00344531	0.002	0.0024375	0.00113281	0.00209375	0.00253125	0.00177344	0.00158594	0.00185938
VP2	1129	A	G	50	E>G	0.00128906	0.00178125	0.0010625	0.00322656	0.00135156	0.0013125	0.00214062	0.00164062		0.00154687	0.00167578	0.00270312	0.00235937	0.00266406	0.0015625	0.00169531	0.00188281	0.00171094	0.00184375	0.00171094	0.00190625
VP2	1130	G	A	50	synonymous>E																0.00548438	0.00478125	0.004875	0.0034375	0.0040625	0.002625
VP2	1132	A	G	51	D>G			0.00110156		0.001875		0.00114844	0.00335938	0.00189844		0.0015	0.001625	0.00240625			0.00157813	0.00128125	0.0015	0.00183594	0.00210938	0.00194531
VP2	1133	C	T	51	synonymous>D														0.00142187
VP2	1135	A	G	52	Q>R										0.00238281		0.00145313	0.00128125	0.00182812		0.00113281	0.00142969		0.0014375		0.00221094
VP2	1136	A	G	52	synonymous>Q				0.0011875		0.00133594	0.0011875		0.00189062	0.00155469		0.00120312	0.00175	0.0018125	0.00152344	0.00160938		0.00141406		0.00136328	0.00177344
VP2	1139	G	A	53	synonymous>P			0.00113281													0.0010625
VP2	1140	A	G	54	T>A									0.0015625				0.00150781				0.00120312	0.0011875	0.00176562		0.00110156
VP2	1142	C	A	54	synonymous>T															0.00121484
VP2	1142	C	T	54	synonymous>T								0.00101562					0.00103125				0.00108984	0.0025625	0.002	0.00440625	0.00473438
VP2	1144	A	G	55	Q>R											0.00103516	0.0015		0.00140625	0.00105469
VP2	1144	A	T	55	Q>L							0.001125	0.002125	0.00307812	0.00421875	0.00275
VP2	1145	A	G	55	synonymous>Q				0.00103125			0.00125781		0.0013125	0.001375		0.00129687	0.0015625	0.00126563	0.00171875		0.00114844
VP2	1148	A	G	56	synonymous>P										0.0015625	0.00127734		0.00140625	0.0023125	0.00175781	0.00110156	0.0010625	0.00161719		0.00105859
VP2	1150	A	G	57	D>G		0.00151563		0.00142969	0.00125781		0.00160938	0.00153125	0.00179688	0.00125781	0.00111328	0.00217187	0.00192969	0.00196875	0.00210156	0.00214062	0.00135937	0.00155469	0.00125	0.00180469	0.00133594
VP2	1151	C	T	57	synonymous>D								0.00157813		0.0010625	0.0011875	0.00125781		0.00153125	0.00160938	0.00147656	0.00201562	0.00198438		0.0011875	0.00117578
VP2	1153	T	C	58	V>A														0.00103125	0.00130469			0.0014375	0.00100781	0.00101562
VP2	1154	T	C	58	synonymous>V		0.00155469			0.0015	0.00123047	0.00167969	0.00228125	0.00275	0.00203125		0.00201562	0.00178125	0.00151563	0.00303906	0.00182031	0.00207813	0.0028125	0.00124219	0.00132031	0.00141406
VP2	1157	C	T	59	synonymous>A															0.00114062				0.00101953
VP2	1158	A	G	60	T>A		0.00141406	0.0015	0.00132031	0.00125		0.00103125			0.00101562	0.00122656	0.00121875	0.00222656	0.00196875	0.00190625	0.00147656	0.00149219	0.00246094	0.0013125	0.00135937	0.00120312
VP2	1159	C	T	60	T>I													0.00163281
VP2	1160	A	G	60	synonymous>T		0.00129687	0.00123438	0.00116406	0.00129687	0.00134375	0.00109375	0.00138281	0.00203125	0.00207813	0.00182812	0.00248437	0.00486719	0.00246094	0.00209375	0.002375	0.00145313	0.00220313	0.00198438	0.00184375	0.00150781
VP2	1161	T	C	61	C>R													0.00149219	0.00104688				0.00121875		0.00107031
VP2	1163	T	C	61	synonymous>C				0.00240625		0.00139063	0.00228906	0.00158594	0.00165625	0.00134375	0.00165625	0.00182812	0.00198438	0.00226562	0.0011875	0.00296875	0.00210938	0.00303906	0.00273437	0.00125781	0.00135937
VP2	1164	A	G	62	R>G		0.00134375									0.00116797		0.0018125	0.00140625	0.00142969		0.00103125	0.00103906	0.00110156	0.00104688
VP2	1166	G	A	62	synonymous>R														0.00114062
VP2	1167	T	C	63	F>L		0.00223438		0.00114844	0.00125	0.00101562	0.00214062	0.00157813	0.00135937	0.00257813	0.00178125	0.00160938	0.00242188	0.00202344	0.00163281	0.00265625	0.00201562	0.00192188	0.00282031	0.00216406	0.00160938
VP2	1168	T	C	63	F>S													0.0011875			0.00132813		0.00121094
VP2	1169	C	T	63	synonymous>F								0.0010625					0.00167969						0.0011875
VP2	1170	T	C	64	Y>H				0.00101953					0.00103125		0.00124219	0.0013125	0.0015			0.00108594	0.00114062			0.00121875	0.00117969
VP2	1172	T	C	64	synonymous>Y	0.00167188	0.00340625	0.00290625	0.00346875	0.00282812	0.00426563	0.00261719	0.00264062	0.00273437	0.00320312	0.00414062	0.00626562	0.00717187	0.00432813	0.0051875	0.00250781	0.001875	0.00199219	0.00275781	0.00321875	0.00257813
VP2	1173	A	G	65	T>A													0.00104688	0.00151563				0.00120312
VP2	1175	C	T	65	synonymous>T													0.00108594							0.00132813
VP2	1177	T	C	66	L>P		0.003375	0.00240625	0.0025625	0.0015	0.00125781	0.00123828	0.0025	0.00151563	0.00245313	0.0026875	0.00429688	0.00632813	0.00359375	0.00188281	0.00111719	0.00115625	0.00295312	0.0020625	0.00198438	0.00190625
VP2	1178	T	C	66	synonymous>L		0.00297656	0.00371875	0.00260156	0.00182031	0.00163281	0.00178125	0.00245313	0.004	0.00282812	0.0035	0.0089375	0.0128906	0.0071875	0.00321875	0.00142187	0.00310938	0.00327344	0.00371875	0.00202344	0.00133594
VP2	1180	A	G	67	D>G		0.00113672	0.00136719	0.00116797	0.00104688		0.00173438	0.00135937	0.00121875			0.00179688	0.00225	0.00239062	0.0015	0.0018125	0.00121094	0.00178125	0.00104688	0.00132031	0.00110938
VP2	1181	C	T	67	synonymous>D													0.00126563		0.00101562
VP2	1182	T	C	68	S>P	0.00115625	0.00228906	0.00146094	0.00217969	0.00236719	0.00108203	0.00232031	0.00221875	0.00217187	0.00216406	0.00208594	0.00301563	0.00352344	0.00282812	0.00228125	0.0019375	0.00240625	0.00232031	0.00276563	0.00314063	0.00173438
VP2	1184	T	C	68	synonymous>S		0.0024375	0.00157813	0.00245313	0.00160156	0.00139844	0.00292188	0.00208594	0.00259375	0.00301563	0.00340625	0.00378125	0.00575	0.00425	0.00271875	0.00360938	0.00278125	0.00354687	0.00380469	0.00351562	0.00289063
VP2	1185	G	A	69	V>M																		0.00103125
VP2	1186	T	C	69	V>A		0.00110938		0.00149219	0.00132813	0.00105469				0.00180469	0.00121875	0.00126563	0.00184375	0.00200781	0.00175	0.0019375	0.00138281	0.003	0.00128125	0.00159375	0.00198438
VP2	1187	G	A	69	synonymous>V													0.00107812	0.00104688		0.00251562	0.00236719	0.00203906	0.00273437	0.00266406	0.00267188
VP2	1189	A	G	70	Q>R												0.00146875	0.00198438	0.001625				0.00178906
VP2	1189	A	T	70	Q>L		0.00417187	0.0123355	0.0212377	0.0188939	0.0196135	0.0173314	0.0163651	0.0101151	0.0122122	0.0125617	0.0108141	0.0173109	0.00990954	0.0205798
VP2	1190	A	C	70	Q>H		0.00104688	0.00203906	0.00220313	0.00201562	0.00124219	0.00116797
VP2	1190	A	G	70	synonymous>Q		0.00367187	0.00201562	0.00325781	0.00263281	0.00186719	0.00276563	0.00367187	0.00275	0.002	0.0039375	0.00860937	0.0127467	0.00498438	0.00346875	0.00321875	0.00424219	0.00541406	0.00292969	0.00266406	0.00240625
VP2	1190	A	T	70	Q>H		0.00142969	0.00371875	0.00359375	0.00153906	0.0010625									0.00570313
VP2	1191	T	C	71	W>R		0.002625	0.00107031	0.00204687	0.001375	0.00139844	0.00190625	0.00121094	0.00148437	0.00121094	0.00207031	0.00221875	0.00432813	0.00257813	0.00157813	0.00133594	0.00109375	0.00267188	0.00213281	0.00164062	0.00147656
VP2	1192	G	A	71	W>*																		0.0011875
VP2	1195	A	G	72	Q>R		0.00203906	0.00153906	0.00178125	0.0018125	0.00101562	0.00146875	0.00225		0.00200781	0.00178906	0.00198438	0.00251562	0.00248437	0.00179688	0.0016875	0.001375	0.00241406	0.00229687	0.00189062	0.00210156
VP2	1196	G	A	72	synonymous>Q											0.00106641	0.00164062
VP2	1198	A	G	73	K>R									0.00117969									0.00140625
VP2	1199	A	G	73	synonymous>K								0.00115625	0.001125			0.00102344		0.00125	0.00169531				0.001125
VP2	1200	A	G	74	T>A	0.00119531	0.00180469	0.0020625	0.0020625	0.00278125	0.00158594	0.00264062	0.00178906	0.0036875	0.0015	0.00203125	0.0026875	0.002375	0.003625	0.00207813	0.00182812	0.00172656	0.00126563	0.0025	0.00194531	0.00157813
VP2	1200	A	T	74	T>S			0.00125391
VP2	1202	C	T	74	synonymous>T												0.00115625
VP2	1203	T	C	75	S>P		0.00190625	0.0016875	0.0020625	0.00138281	0.00125781	0.0024375	0.00179688	0.00178125	0.00315625	0.00192969	0.00276563	0.00315625	0.00315625	0.00184375	0.00260937	0.00207813	0.00264062	0.00275	0.00254688	0.00139063
VP2	1205	A	G	75	synonymous>S		0.001375	0.00146875	0.00189062	0.0010625	0.0014375	0.00159375	0.00153125		0.00259375	0.00128906	0.00134375	0.00207813	0.00223438	0.00151563	0.00214844	0.00116406	0.00153906	0.00146875	0.00214844	0.00130469
VP2	1208	A	G	76	synonymous>P		0.00153906	0.00128125	0.00161719	0.00130469	0.0013125	0.00142969	0.00196094		0.00265625	0.00246484	0.00257813	0.0024375	0.00251562	0.00303906	0.00135937	0.00189844	0.002875	0.00165625	0.00146875	0.00153125
VP2	1211	A	G	77	synonymous>G			0.00105078			0.00116406	0.00126563	0.00102344	0.00142187	0.00134375	0.00144141	0.00175	0.00225	0.00185938	0.002375	0.00203125		0.00203906	0.00184375	0.00155469
VP2	1212	T	C	78	W>R							0.00109766				0.00110156	0.00109375	0.00142187			0.00126563	0.00126563	0.00146875	0.00155469	0.00119141	0.00121875
VP2	1215	T	C	79	W>R		0.001375	0.00163281	0.00118359	0.00119922	0.00102734	0.00135156	0.00142969	0.002875	0.00221875	0.00151563	0.00196875	0.0025625	0.00204687	0.00124609	0.00139844	0.00175	0.0020625	0.00186719	0.00191406	0.00159375
VP2	1218	T	C	80	W>R			0.00170312	0.0011875	0.00139063		0.00154687		0.00210938	0.00159375			0.00160156	0.00171875	0.00199219	0.00173438	0.00141406	0.00145313	0.001125	0.00146875
VP2	1221	A	G	81	K>E				0.00107422					0.00146875		0.00123828	0.00121875		0.0015625	0.00178125	0.00109375		0.00120312	0.00132031	0.00109375
VP2	1222	A	G	81	K>R		0.00201562	0.00139063	0.00196875	0.00141406		0.00126172		0.002125	0.00192188	0.00153516	0.0014375	0.00192969	0.0014375	0.00230469	0.00260937	0.00175	0.00201562	0.00274219	0.00210156	0.00235156
VP2	1223	G	A	81	synonymous>K														0.00103125
VP2	1224	C	T	82	synonymous>L																		0.00103125
VP2	1225	T	C	82	L>P			0.001375	0.00189062	0.00132031		0.0014375	0.00167188	0.00184375	0.00140625	0.00145313		0.00178906	0.00222656	0.00138281	0.00184375	0.00207813	0.00225	0.0016875	0.00157422	0.00139063
VP2	1226	G	A	82	synonymous>L												0.00117188
VP2	1229	C	T	83	synonymous>P		0.00126563						0.00220313	0.00108594	0.00186719	0.0019375		0.00279688	0.00325	0.00196875	0.00136719	0.00109375	0.00116406	0.00110938	0.00110938
VP2	1230	G	A	84	D>N				0.00125								0.00103516	0.00171875	0.001125
VP2	1231	A	G	84	D>G										0.00101562			0.00123438		0.00110547
VP2	1232	T	C	84	synonymous>D		0.00125		0.00136328	0.00142969	0.00123438	0.00150781	0.00207031	0.00203125	0.00105469	0.00197266	0.00109375	0.00220313	0.00270312	0.00239844		0.00205469	0.0015625	0.00142969	0.00126563	0.00151563
VP2	1233	G	A	85	A>T													0.00109375
VP2	1235	T	C	85	synonymous>A	0.00136719	0.00571875	0.00303906	0.00595313	0.00335938	0.00315625	0.00307031	0.00421875	0.00184375	0.00292188	0.00376562	0.00732813	0.0115543	0.00417969	0.00335156	0.0035625	0.00310156	0.00385937	0.0034375	0.00347656	0.0033125
VP2	1236	T	C	86	synonymous>L		0.00144922							0.00120312				0.0016875	0.00128125		0.00105469
VP2	1238	G	A	86	synonymous>L														0.00139844
VP2	1238	G	T	86	L>F																				0.00110938
VP2	1239	T	C	87	S>P		0.00115625		0.001375	0.00125781		0.00102344		0.0013125	0.00146094	0.00108594	0.00121875	0.00186719	0.00113281	0.00173438	0.00179688	0.00121875	0.0021875	0.00174219	0.00228125
VP2	1241	G	A	87	synonymous>S									0.00120312			0.00142187	0.0020625		0.0024375					0.00100781
VP2	1243	A	G	88	N>S				0.00123828			0.00104688		0.00128906		0.00134375	0.001375	0.0014375	0.00211719	0.00107812	0.00178125		0.00146094	0.00103125	0.00141406	0.00134375
VP2	1244	C	T	88	synonymous>N												0.00122656	0.00210156
VP2	1245	T	C	89	synonymous>L		0.0021875		0.00117578		0.00125781	0.00112891	0.0010625	0.00139063	0.00170312	0.00219531	0.00303906	0.00359375	0.0014375	0.00184375	0.00232813		0.00110938		0.00170312	0.00139063
VP2	1247	A	G	89	synonymous>L		0.00153906	0.00159375		0.00136719		0.00110938	0.00188281		0.0014375	0.00209375	0.0028125	0.0033125	0.00228125	0.00222656	0.00184375	0.00254688	0.00214844	0.00139844	0.00185938	0.00211719
VP2	1250	A	G	90	synonymous>G	0.00159375	0.00207813	0.00284375	0.00235156	0.0015	0.00210156	0.00228125	0.00353125	0.0023125	0.00267969	0.00149219	0.00236719	0.00323438	0.0016875	0.00240625	0.00265625	0.00276563	0.00182812	0.00174219	0.00185156	0.00203125
VP2	1251	C	T	91	synonymous>L												0.0011875	0.00149219		0.00117188				0.00108594
VP2	1252	T	C	91	L>P													0.00141406	0.00152344
VP2	1254	T	C	92	F>L														0.00128125	0.00144531	0.0021875		0.00167188	0.00139844
VP2	1254	T	G	92	F>V									0.00173438
VP2	1256	T	C	92	synonymous>F								0.00150781	0.0014375	0.00105469	0.00145313	0.00164062	0.00157813	0.00110938	0.00160938			0.00179688
VP2	1259	G	A	93	synonymous>G									0.00110938			0.00153906
VP2	1260	C	T	94	Q>*									0.0011875
VP2	1261	A	G	94	Q>R		0.00111719					0.00107812			0.00154687	0.00148437	0.00125781	0.00179688	0.003375	0.00121094	0.00217187	0.00110938	0.0015	0.0010625	0.00151563
VP2	1263	A	G	95	N>D				0.0010625			0.00135937		0.00104688				0.00161719	0.00129687	0.00129687	0.00140625		0.00195312	0.0013125	0.00105078
VP2	1264	A	G	95	N>S		0.00132813		0.00213281		0.00170312	0.00267969	0.002	0.00128125	0.00178125	0.00199219	0.00150781	0.00228125		0.00201562	0.00234375	0.0010625	0.002125		0.00149609	0.0014375
VP2	1265	C	T	95	synonymous>N									0.00109375						0.002
VP2	1266	A	G	96	M>V							0.0011875				0.00121875		0.00144531	0.00185938			0.001875	0.00147656	0.00123438	0.00109375
VP2	1267	T	C	96	M>T		0.00103906									0.00107812	0.00153125	0.00125	0.00179688	0.00140625	0.00101562		0.00157813	0.00147656	0.00171875
VP2	1270	A	G	97	Q>R	0.00126563	0.00197656	0.00196875	0.00142187	0.00189062	0.00130469	0.00215625	0.00192188	0.00132813	0.00210938	0.00214062	0.00239062	0.002875	0.00353125	0.0019375	0.00192969	0.0024375	0.00267188	0.00229687	0.002375	0.00189062
VP2	1271	G	A	97	synonymous>Q													0.00109375
VP2	1272	T	C	98	Y>H			0.00116406	0.00113281				0.0011875	0.00176562	0.00135937	0.00134375	0.00107812		0.00159375		0.00154687		0.00142969	0.00119531
VP2	1273	A	G	98	Y>C		0.00128125	0.001125		0.00117188					0.00107812	0.00108594	0.00171875	0.00142969	0.00142969		0.00148437		0.001125	0.00102344	0.00109375	0.00153125
VP2	1274	C	T	98	synonymous>Y														0.00114062	0.00134375
VP2	1276	A	G	99	H>R			0.00106641	0.00152344			0.001375	0.00126563		0.00146875	0.00114453		0.00180469	0.00201562		0.00121094		0.00171094	0.00157813		0.00136719
VP2	1277	C	T	99	synonymous>H											0.00115625		0.00163281
VP2	1278	T	C	100	Y>H																		0.00110938
VP2	1280	C	T	100	synonymous>Y				0.00132813		0.00153906		0.00121875	0.002	0.00132813	0.00107031	0.00239844	0.00245313		0.00103125				0.00304687	0.00439062	0.00390625
VP2	1281	T	C	101	synonymous>L		0.00125781	0.00115625	0.00207031		0.00302344	0.00209375	0.002625	0.00228125	0.00134375	0.00265625	0.00325	0.004875	0.00507812	0.00221875	0.00234375	0.00178906	0.0035625	0.00163281	0.00155469	0.00178906
VP2	1283	A	G	101	synonymous>L		0.0029375	0.00142187	0.00186719	0.00288281	0.00276563	0.00385156	0.00448438	0.00346875	0.00345313	0.00627344	0.00645312	0.0063125	0.006875	0.0030625	0.0029375	0.0014375	0.00197656	0.0013125	0.00125	0.00142187
VP2	1284	G	A	102	G>S																				0.00121094
VP2	1286	C	T	102	synonymous>G															0.00132813
VP2	1289	A	G	103	synonymous>R						0.00105469	0.00120312			0.00148437	0.00131641	0.0015625	0.00107031	0.00310938
VP2	1290	A	G	104	T>A		0.00108594							0.00134375	0.00105469			0.00157813	0.00132031	0.00204687	0.00240625	0.00139063	0.0013125	0.00109375	0.0014375
VP2	1292	T	C	104	synonymous>T									0.001625	0.00179688		0.001625	0.00203906	0.00142969	0.00171875	0.00134375	0.001375	0.0013125
VP2	1295	G	A	105	synonymous>G													0.0011875					0.00167969			0.00102344
VP2	1296	T	C	106	Y>H		0.00110156	0.0014375				0.00134375	0.00214844	0.00103125		0.0013125	0.00234375	0.00170312	0.00130469	0.00125781	0.00109375	0.00220313	0.00182031	0.00114062	0.00128906	0.00144922
VP2	1297	A	G	106	Y>C		0.00123438					0.00105469			0.00100781	0.00104688	0.00139844	0.00225	0.00182031			0.0014375	0.00185938	0.00125
VP2	1298	T	C	106	synonymous>Y		0.00166406	0.0023125	0.00246875	0.0013125	0.00229687	0.00285937	0.0034375	0.0025625	0.00357813	0.00295312	0.00546875	0.0050625	0.00398437	0.0152961	0.00245313	0.00217187	0.00475	0.00354687	0.003125	0.00310938
VP2	1299	A	G	107	T>A			0.00110938									0.00176562	0.00275		0.00122656	0.00123438		0.00100391	0.00123438		0.00104688
VP2	1300	C	T	107	T>I													0.00122656
VP2	1301	C	A	107	synonymous>T													0.00103906
VP2	1301	C	T	107	synonymous>T										0.00129687	0.0019375	0.00165625	0.002625	0.00130469		0.00154687	0.00189062	0.00296875		0.00123438
VP2	1302	G	A	108	V>I		0.00321094	0.0034375	0.0033125	0.00267188	0.00178125	0.00189062	0.00130469		0.002375	0.00157422	0.00161719	0.00167188	0.00275	0.00309375
VP2	1303	T	C	108	V>A			0.00124219			0.00101172		0.00103125	0.00184375		0.0010625		0.0011875	0.00135156			0.00103906	0.00117188	0.00107812
VP2	1304	A	G	108	synonymous>V		0.00163281	0.00178125	0.00150781		0.00126172	0.00146094		0.002375	0.00121875	0.00162891	0.00160938	0.00270312	0.00290625	0.00557812	0.00100781	0.00129687	0.0011875	0.00138281	0.001375	0.00140625
VP2	1306	A	G	109	H>R																		0.00154687
VP2	1307	T	C	109	synonymous>H		0.00165625	0.00120312	0.00179688	0.00178125	0.00189062	0.00224219	0.003375	0.00215625	0.00592188	0.0056875	0.009	0.0115748	0.00696875	0.0015	0.00120312	0.00185938	0.00223438	0.00289063	0.00171875
VP2	1309	T	C	110	V>A		0.00125	0.00115625	0.00173438	0.00178906	0.00120312	0.00110938	0.00132813	0.00141406	0.0018125	0.00149219	0.0011875	0.00294531	0.00236719	0.00236719	0.0015	0.00246875	0.00178125	0.00264062	0.00175391	0.00145313
VP2	1310	G	A	110	synonymous>V													0.00111719								0.00153125
VP2	1311	C	T	111	Q>*																		0.0015
VP2	1312	A	G	111	Q>R		0.00169531					0.0015				0.00125	0.00142187	0.0023125	0.00123438	0.00189062	0.00209375	0.00110938	0.00242188		0.00114062
VP2	1313	G	A	111	synonymous>Q													0.00209375	0.00102344		0.00123438	0.00115625	0.001625	0.001125
VP2	1314	T	C	112	C>R									0.0019375	0.00135156	0.00106641		0.00159375	0.00133594	0.00100781		0.00125	0.00134375		0.0011875
VP2	1316	C	T	112	synonymous>C								0.00115625						0.00109375			0.001125		0.00100781
VP2	1317	A	G	113	N>D									0.00153125	0.00114062			0.00104688			0.0010625		0.00138281	0.00140625	0.00115625
VP2	1318	A	G	113	N>S		0.0015	0.00149219	0.0018125	0.0015	0.00128906		0.00223438	0.00246875	0.00226562	0.00161328	0.00134375	0.00257813	0.00151563		0.00121875	0.00145313	0.00208594	0.001875	0.00196875	0.00142578
VP2	1319	T	C	113	synonymous>N	0.00101562	0.00192188	0.001125	0.00196875	0.00155469	0.00157813	0.00239844		0.00221875	0.00279688	0.00273437	0.00323438	0.00379688	0.00345313	0.00196094		0.00189844	0.00223438	0.001125	0.00192188	0.00125
VP2	1322	A	G	114	synonymous>A		0.00221094	0.00122266	0.00150781		0.00132031		0.00154687	0.00124219	0.0015625	0.00264062	0.00247656	0.004625	0.00509375	0.00207031	0.00198438	0.00429688	0.006375	0.00775	0.0094778	0.0128289
VP2	1323	T	C	115	S>P		0.00155859		0.00171875			0.0020625	0.0015625	0.0010625	0.00171875	0.00127344	0.00176562	0.00253125	0.001125	0.0026875	0.00225	0.00179688	0.0028125	0.0019375	0.00117969	0.001375
VP2	1325	T	C	115	synonymous>S		0.00190625		0.00125781	0.0019375	0.00103906	0.00207813	0.0011875	0.00232813	0.00136719	0.00298437	0.00345313	0.00395312	0.0044375	0.0035	0.0018125	0.00170312	0.00232813	0.0018125	0.00252344	0.00111719
VP2	1327	A	G	116	K>R		0.00191406	0.00280469	0.00203906	0.00182812		0.001375		0.00133594	0.00117188	0.00157422	0.00217969	0.0020625		0.0016875		0.00100781	0.00110156
VP2	1329	T	C	117	F>L					0.00100781		0.00125781		0.00203906	0.00210156			0.00153906	0.00109375	0.00130469	0.0034375		0.00275		0.00160938	0.00155469
VP2	1330	T	C	117	F>S												0.00108984				0.00229687		0.0025625	0.0010625
VP2	1331	C	T	117	synonymous>F														0.00111719		0.00122656	0.0013125	0.00307812	0.00403125	0.00520313	0.00480469
VP2	1333	A	G	118	H>R	0.00105469	0.00109375	0.00126172	0.00197656	0.00125		0.00180078	0.00169531	0.00107031		0.00135156	0.00125	0.00161719	0.00152344	0.00148437	0.00163281	0.00154687	0.00221094	0.00148437	0.00165625	0.00157422
VP2	1334	C	T	118	synonymous>H												0.00154687	0.00217187
VP2	1336	A	G	119	Q>R										0.00126563		0.00157813	0.00235937	0.00157031		0.00105469		0.0020625	0.00114844	0.00103125
VP2	1337	A	G	119	synonymous>Q		0.00195312	0.00107812	0.00167188		0.00153125	0.00128906	0.00164844	0.00134375	0.00153906	0.00139063	0.00182031	0.0059375	0.00189062	0.00165625	0.00192969	0.00175781	0.00157813	0.00133594	0.00164062
VP2	1340	A	G	120	synonymous>G		0.00122656	0.00149219	0.00119141	0.00109375		0.00207813	0.001875	0.00273437	0.00198438	0.00225781	0.00226562	0.00278906	0.0025	0.002125	0.00177344	0.00177344	0.00116406	0.00116406	0.00134766	0.0015625
VP2	1341	T	C	121	C>R															0.00107812			0.00107031
VP2	1343	C	T	121	synonymous>C															0.00250781
VP2	1344	T	C	122	synonymous>L		0.00239062	0.0029375	0.00365625	0.00310156	0.00271875	0.00257813	0.003125	0.00246875	0.00171094	0.00174219	0.00225	0.00246875	0.00196094	0.00192969	0.0016875	0.00106641	0.00279688	0.00209375	0.00213281	0.00107031
VP2	1345	T	C	122	L>S															0.00125781	0.00116406		0.00158594
VP2	1346	G	A	122	synonymous>L												0.00107812
VP2	1348	T	C	123	L>P		0.00305469	0.00146094	0.00167188		0.00142187	0.00176172	0.00138281			0.001875	0.00133594	0.00264844	0.0026875	0.00107031	0.00179688	0.0014375	0.00110938	0.00178906
VP2	1349	A	G	123	synonymous>L		0.00257813		0.00109375		0.001625	0.0013125	0.0015	0.0026875	0.00153906	0.00154687	0.00233594	0.00360938	0.00363281	0.0026875	0.0031875		0.00225	0.00178906	0.00140625	0.00171875
VP2	1351	T	C	124	V>A		0.00116797		0.0010625			0.00134375		0.00133594		0.00119531	0.00132813	0.001625	0.0020625	0.00133594	0.00184375				0.00125781	0.00140625
VP2	1352	A	G	124	synonymous>V	0.00113281	0.00242188		0.0018125	0.0013125	0.00121875	0.00221875	0.001125	0.00195312	0.00169531	0.001875	0.00392187	0.00521875	0.00378125	0.006125	0.00114062	0.00117969	0.002	0.0014375	0.0011875	0.0013125
VP2	1354	T	C	125	V>A		0.00128125	0.00128125	0.00102344	0.0013125	0.00126563	0.00190625		0.00320312	0.001625	0.00182812	0.001625	0.00178906	0.002	0.00104688	0.00204687	0.00116406	0.00196875	0.00125391	0.00225
VP2	1356	T	C	126	C>R		0.0016875	0.00195312	0.00140625	0.00105469	0.00111719	0.00208594		0.00157813	0.00154687	0.00136328	0.00165625	0.00169531	0.002125	0.00186719	0.00189062	0.00171875	0.00192188	0.00135156	0.00171875	0.00139063
VP2	1358	T	C	126	synonymous>C	0.00145313	0.00275781	0.00226562	0.00321094	0.00183594	0.00214062	0.0033125	0.00230469	0.00234375	0.00185938	0.00221094	0.00289063	0.00357813	0.00339062	0.00332812	0.002375	0.0028125	0.002625	0.003625	0.00248437	0.00296094
VP2	1360	T	C	127	V>A									0.0011875		0.0013125	0.00173438	0.00171094	0.0024375	0.00108594	0.00153906		0.00157813	0.00223438
VP2	1361	A	G	127	synonymous>V			0.00101562	0.00132031				0.00157813	0.00142187	0.00142969	0.00175781	0.00265625	0.0031875	0.00263281	0.00240625	0.0014375			0.00140625
VP2	1361	A	T	127	synonymous>V															0.00375
VP2	1362	C	T	128	P>S								0.0010625
VP2	1364	G	A	128	synonymous>P									0.00125	0.0013125	0.0023125	0.00319531	0.00346875	0.00139063
VP2	1367	A	G	129	synonymous>E		0.00153516				0.00180469	0.00117188	0.00132813	0.00115625	0.0011875	0.00134375	0.00176562	0.00242188	0.00185156	0.0023125	0.00175	0.00144531	0.00158594	0.00220313	0.00222656
VP2	1370	T	C	130	synonymous>A		0.00148437	0.00122656	0.0010625	0.00161719	0.00103125		0.00146875		0.001875	0.00278906	0.00295312	0.0045	0.00303125	0.00257813	0.0016875	0.00169531	0.00228125	0.001625	0.00170312	0.00130469
VP2	1372	A	G	131	E>G		0.00165625		0.00173438	0.00142187	0.00144531	0.00209375		0.00157813	0.00117188	0.00140234	0.00158594	0.00232031	0.00196875	0.00158594	0.00242188	0.0019375	0.00186719	0.00129687	0.00289063	0.00228906
VP2	1374	A	G	132	M>V		0.00160938		0.00195312	0.00190625	0.00127344	0.00210156	0.00203906	0.00242188	0.00148437	0.00181641	0.00201562	0.00364062	0.00254688	0.00245313	0.00264062	0.00210938	0.00321875	0.00182812	0.00225	0.00196094
VP2	1375	T	C	132	M>T			0.00135156				0.001625	0.00109375				0.002	0.0023125		0.00116016		0.00117969	0.00158594	0.00133594		0.0016875
VP2	1379	T	C	133	synonymous>G		0.00146484	0.00135156	0.00248437	0.00171094	0.00203906	0.002375	0.0030625	0.0020625	0.003125	0.00164844	0.00182031	0.00309375	0.00285156	0.00384375	0.00210938	0.00151563	0.00179688	0.00240625	0.001625	0.00160938
VP2	1380	T	C	134	C>R							0.00108594		0.00117188	0.00121875				0.00125				0.00138281		0.00130469
VP2	1381	G	A	134	C>Y																0.00104688
VP2	1382	C	T	134	synonymous>C					0.00101562					0.00153125		0.00170312	0.00114062	0.00279688	0.00124219			0.00111719		0.00103906
VP2	1384	C	T	135	A>V												0.0015625
VP2	1385	A	G	135	synonymous>A								0.001625				0.001875	0.00269531	0.00210156	0.00101953			0.00157031
VP2	1386	A	G	136	T>A								0.00105469		0.001125		0.001625	0.00194531		0.00136719	0.00226562		0.00125	0.00109375		0.00108594
VP2	1388	G	A	136	synonymous>T									0.00154687
VP2	1389	C	A	137	L>I																0.00124219	0.00149219	0.00359375	0.00151563	0.0018125	0.00125781
VP2	1390	T	C	137	L>P		0.0018125				0.00129687		0.00150781		0.001125	0.00122656	0.00176562	0.001625	0.00234375	0.005125	0.00371875	0.00303125	0.0056875	0.00467187	0.00442969	0.00298437
VP2	1391	A	G	137	synonymous>L		0.00220313	0.00180469	0.0015	0.00177344	0.00170312	0.00207813	0.00203906	0.0024375	0.00110156	0.00241406	0.00250781	0.00342969	0.0025625	0.00154687	0.00161719	0.00150781	0.00129687	0.00121094	0.0014375	0.00140625
VP2	1392	G	A	138	D>N														0.00123438	0.00425	0.00451563	0.00823438	0.0129112	0.0147204	0.0196957	0.0245683
VP2	1393	A	G	138	D>G	0.00180469	0.00236719	0.00175781	0.00239844	0.00164844	0.0026875	0.00259375	0.00190625	0.00165625		0.0015625		0.00269531	0.0040625	0.00660938	0.0148026	0.0259868	0.0458882	0.0563322	0.0642681	0.063898
VP2	1394	C	A	138	D>E															0.00314844	0.004625	0.0131168	0.0251234	0.0277961	0.0318257	0.0360609
VP2	1394	C	T	138	synonymous>D													0.001625	0.0011875	0.00127344						0.00128125
VP2	1395	A	G	139	N>D		0.00114062		0.0010625				0.00121094		0.00157813	0.00140234		0.00210938	0.001875	0.00153125	0.0011875		0.00159375	0.00169531
VP2	1396	A	G	139	N>S		0.00126563		0.0011875	0.00134375	0.00146875	0.00125781		0.00135937		0.00139844	0.00146875	0.00171875	0.00220313	0.00157813	0.00239062		0.0015	0.00142187	0.00170312	0.00125
VP2	1397	C	T	139	synonymous>N											0.00129297	0.0013125	0.002875	0.00239062				0.00130469
VP2	1398	A	G	140	T>A		0.00157813		0.0014375	0.00178906	0.00104688	0.00198438	0.00151563	0.00134375	0.0016875	0.00166016	0.00135937	0.00160156	0.0011875	0.00195312	0.001375	0.00195312	0.0026875	0.00148437	0.00164062	0.00171875
VP2	1402	C	A	141	P>Q																0.00122656
VP2	1403	A	G	141	synonymous>P		0.00104688			0.00127344	0.00116406	0.00225	0.0023125	0.00174219	0.00201562	0.00213281	0.00307812	0.003	0.00259375	0.00102344	0.00147656	0.00167188	0.00207813		0.00178125	0.00110938
VP2	1404	T	C	142	S>P							0.00141406			0.00113281				0.00146875	0.00161719		0.00111719	0.00178125	0.00123438	0.00107031
VP2	1406	C	A	142	synonymous>S																0.00178125
VP2	1406	C	T	142	synonymous>S													0.00165625
VP2	1407	A	G	143	S>G								0.00104688			0.00158594	0.00310156	0.00326563	0.00209375	0.00105469	0.0013125	0.00135156		0.00109375
VP2	1408	G	A	143	S>N				0.00104688		0.00103906						0.00134375	0.00226562	0.00197656				0.00172656
VP2	1409	T	C	143	synonymous>S		0.00136719		0.00103516			0.00104297	0.00196094		0.00128125	0.00185938	0.00190625	0.00132813	0.00111719	0.00365625	0.00164062	0.00109375	0.00117969	0.0026875	0.00128125	0.00160938
VP2	1410	G	A	144	A>T								0.00117188				0.00142187		0.00100781
VP2	1411	C	T	144	A>V												0.00134375		0.00105469
VP2	1412	A	G	144	synonymous>A		0.00190625	0.00157813	0.00228906	0.00280469	0.00248437	0.00350781	0.00358594	0.0038125	0.003625	0.00350781	0.0036875	0.00403125	0.00330469	0.00234375	0.00146875	0.00132813	0.00290625	0.00217187	0.0023125	0.00219531
VP2	1415	A	G	145	synonymous>E							0.00104688		0.00135937		0.00119531	0.00211719	0.00105469	0.00315625	0.00142187	0.0056875	0.00676562	0.00525	0.00345313	0.00278125	0.00242188
VP2	1416	T	C	146	synonymous>L												0.00113281			0.00244531
VP2	1419	C	T	147	synonymous>L												0.0015	0.00135156
VP2	1420	T	C	147	L>P		0.00269531		0.00173438	0.00127344	0.00234375	0.00164844	0.00147656	0.00164062		0.00184375	0.00150781	0.00515625	0.00296875	0.00225		0.00217187	0.00201562	0.002125	0.00177344	0.00186719
VP2	1420	T	G	147	L>R													0.0011875
VP2	1421	G	A	147	synonymous>L												0.00111719	0.00159375	0.00160938			0.00153125	0.00146094
VP2	1421	G	T	147	synonymous>L		0.0011875
VP2	1426	G	C	149	G>A														0.00104688		0.00128125
VP2	1427	C	T	149	synonymous>G					0.00101562			0.00178125	0.00110938						0.00135937						0.00123828
VP2	1429	A	G	150	D>G		0.00171094	0.001625	0.00228906	0.00128125	0.00164844	0.00155469	0.00119531		0.00224219	0.00217187	0.00195312	0.00194531		0.00140625	0.00260937	0.00215625	0.00141406	0.00154687	0.0015625	0.00101562
VP2	1430	T	C	150	synonymous>D		0.0015		0.00139063	0.00110156		0.0010625	0.00142187		0.0013125	0.00138672	0.00173438	0.00236719	0.00115625	0.00365625	0.00119531		0.0010625
VP2	1431	A	G	151	S>G		0.00139844	0.00161719	0.00180469			0.00102344	0.0011875	0.00121875	0.00153906	0.00153906	0.00153125	0.00373437	0.00307812	0.00202344	0.00176562	0.00142969	0.00172656	0.00141406	0.00202344	0.00178125
VP2	1432	G	A	151	S>N						0.00179688	0.00118359										0.00152344
VP2	1433	C	T	151	synonymous>S		0.00101562					0.00110156	0.00135156		0.00103125		0.00151563	0.00283594	0.00146094	0.00136719			0.00123438		0.00140625	0.00150781
VP2	1434	G	A	152	A>T																		0.00158594	0.00120312
VP2	1436	A	G	152	synonymous>A											0.00136328		0.00116406	0.00204687	0.0026875
VP2	1437	A	G	153	K>E									0.00182812				0.0011875	0.001125	0.00120312			0.00116406
VP2	1438	A	G	153	K>R													0.00128125					0.00139844	0.00107812	0.00100781
VP2	1441	A	G	154	E>G		0.00141406	0.00114062	0.00169531	0.00182031	0.0010625	0.0015	0.00139844	0.00153125	0.001875	0.00177344	0.00104688	0.00234375	0.0028125	0.00151563	0.00221094	0.00157031	0.00245313	0.00189844	0.002125	0.00159375
VP2	1442	G	A	154	synonymous>E													0.00114062
VP2	1443	T	C	155	F>L									0.0011875				0.00116406	0.00101562	0.00104688	0.00126563	0.00132813	0.00101562
VP2	1444	T	C	155	F>S														0.00107812		0.00119531
VP2	1445	T	C	155	synonymous>F			0.0010625	0.00110938		0.00110938	0.00122656			0.00121875	0.00101562	0.00182812		0.0015625	0.0011875	0.00115625		0.00101562
VP2	1446	G	A	156	A>T														0.00117188	0.00140625
VP2	1447	C	T	156	A>V			0.00148437	0.00126563		0.0014375	0.00151172	0.00210938	0.00120312	0.0014375	0.00319531	0.0031875	0.00553125	0.00453125	0.00528125	0.00164062	0.00225781	0.00202344	0.00195312	0.00195312	0.00173438
VP2	1448	G	A	156	synonymous>A										0.00164844	0.00147656		0.00164062	0.00105469	0.0013125	0.0028125	0.001875	0.00257813	0.00198438	0.0024375	0.00186719
VP2	1448	G	T	156	synonymous>A																0.00214844	0.00235156	0.00350781	0.00295312	0.0034375	0.00255469
VP2	1450	A	G	157	D>G			0.00108594				0.00121094	0.00148437	0.00207031	0.001125	0.00132813	0.0011875	0.00208594	0.00119531	0.001625	0.00183594		0.00217187	0.00135937	0.00166406	0.00140625
VP2	1451	C	T	157	synonymous>D														0.00120312	0.00220313	0.00196094	0.00302344	0.00227344	0.00150781	0.00221875	0.0016875
VP2	1453	A	G	158	K>R			0.00167969	0.001625	0.00167969		0.001375						0.00201562	0.00180469	0.00179688	0.00210156		0.00103125	0.00128125		0.00116406
VP2	1454	A	G	158	synonymous>K		0.00146875					0.00226562		0.00198438	0.001625	0.0019375	0.001375	0.00151563	0.00188281	0.00215625	0.0016875	0.00113281	0.00186719	0.0011875	0.00174219	0.0013125
VP2	1457	G	A	159	synonymous>P																				0.00129687
VP2	1458	G	A	160	V>I							0.00108594		0.00192969	0.00207813	0.00210938	0.00260937	0.00176562	0.00123438	0.0010625
VP2	1459	T	C	160	V>A		0.002375	0.001875	0.00179688	0.00198438	0.00167969	0.00203125	0.001625	0.00273437	0.00260937	0.00140625	0.001375	0.00273437	0.00257813	0.00195312	0.0023125	0.00165625	0.00154687	0.00303906	0.00273437	0.00213281
VP2	1460	C	T	160	synonymous>V										0.00154687			0.00214844		0.00163281	0.00102344	0.00120312	0.00107031
VP2	1461	G	A	161	A>T		0.00140234	0.00121875				0.00115625		0.00125			0.00127344	0.00134375		0.00173438			0.00105859
VP2	1462	C	T	161	A>V															0.0013125
VP2	1463	A	G	161	synonymous>A		0.00114062		0.00178906		0.00120312	0.00108203	0.00129687	0.0028125	0.00285937	0.00129687	0.00144531	0.0015625	0.00148437	0.00225	0.00177344	0.00155469	0.00117188	0.00173438	0.00184375	0.0013125
VP2	1463	A	T	161	synonymous>A															0.00276563
VP2	1464	T	C	162	S>P									0.00152344			0.00138281	0.00209375	0.00164062		0.002125	0.0010625	0.00171875	0.00148437	0.00121094
VP2	1466	C	T	162	synonymous>S													0.0011875		0.00109375
VP2	1468	G	A	163	G>E														0.00109375				0.00117188		0.00121484	0.00110156
VP2	1469	G	A	163	synonymous>G													0.00170312	0.00140625	0.00346875
VP2	1469	G	T	163	synonymous>G						0.00135937
VP2	1470	T	C	164	S>P		0.00113281		0.0019375	0.00217187	0.00205469	0.00217187	0.00221875	0.00360938	0.0010625	0.00228125	0.00253125	0.00220313	0.00267188	0.00220313	0.00198438	0.00196094	0.0034375	0.00196875	0.00188281	0.0023125
VP2	1472	C	T	164	synonymous>S													0.001125		0.00141406
VP2	1473	A	G	165	N>D							0.00117188	0.00117188	0.00190625	0.00132031	0.00100781	0.00151563	0.00134375	0.00194531	0.003625	0.00170312	0.00164844	0.0014375	0.00139063	0.0015	0.00107812
VP2	1474	A	G	165	N>S				0.00102344		0.0015			0.0014375			0.0011875	0.00125	0.00207813	0.00184375	0.00171875	0.00141406	0.001375	0.00176562	0.00108594
VP2	1475	C	T	165	synonymous>N									0.00100781		0.00121094	0.00175	0.00173438	0.00201562	0.00135937			0.00140625
VP2	1476	A	G	166	K>E														0.00102344	0.00410938	0.0365132	0.0474507	0.0612253	0.0503289	0.0315995	0.0337171
VP2	1477	A	G	166	K>R		0.00117188					0.00142187		0.00209375	0.00198438	0.00178516			0.00159375	0.00134375		0.0015	0.00242188		0.00144531
VP2	1478	G	C	166	K>N																0.0147204	0.0261513	0.0476562	0.0294408	0.0165913	0.0143092
VP2	1479	T	C	167	synonymous>L												0.00155469		0.00148437				0.0013125
VP2	1480	T	C	167	L>S							0.00147656		0.00117188	0.001375			0.00103125		0.00140625	0.00116406	0.00129687	0.00119531	0.00153125	0.00122656
VP2	1480	T	G	167	L>W			0.00120312	0.0011875
VP2	1481	G	A	167	synonymous>L														0.001375
VP2	1482	G	A	168	V>I														0.00142187
VP2	1483	T	C	168	V>A		0.0015625	0.00151563	0.00115625	0.00194531	0.00109375	0.0015	0.00110938	0.00107812		0.00153906	0.0015625	0.0015		0.0155633	0.001375	0.00176562			0.00101562
VP2	1484	A	G	168	synonymous>V	0.00107812	0.0016875	0.00125	0.00141406	0.00167188	0.00233594	0.00282031	0.0025	0.0018125	0.00229687	0.00192188	0.00213281	0.00140625	0.00275781	0.00282031	0.00310938	0.00348438	0.00401562	0.00389062	0.00291406	0.00239062
VP2	1486	A	G	169	Q>R					0.00119531					0.001125			0.00146094	0.00151563		0.00103125	0.00122656	0.0023125		0.0014375	0.00132031
VP2	1488	A	G	170	R>G		0.002375		0.00198438			0.00110156	0.00235937	0.00192188	0.00152344	0.00151953	0.00289063	0.0023125	0.00353125	0.00194531	0.00245313	0.00113281	0.00205469	0.0015625	0.00189062	0.00125
VP2	1492	T	C	171	V>A		0.00102734		0.00107812	0.00154687	0.00100781	0.00163281	0.0015625	0.00164062	0.0013125	0.00142578	0.00159375	0.00141406	0.002		0.00185938	0.00110938	0.00171875		0.00199219	0.00192188
VP2	1495	T	C	172	V>A		0.00127344	0.00109375	0.00154687	0.00117188				0.00275		0.00125		0.00146875	0.00210938	0.00145313	0.0018125	0.00123438	0.00203125	0.001375		0.00103516
VP2	1496	G	A	172	synonymous>V													0.00111719	0.0010625
VP2	1497	T	C	173	Y>H		0.00252344	0.00261719	0.0019375	0.00123438	0.00110156	0.00124219			0.00147656	0.00138672	0.00148437	0.00130469	0.00153906	0.00195312	0.0014375			0.00104688		0.00103125
VP2	1498	A	G	173	Y>C		0.00103906		0.00169531	0.001125			0.00126563	0.00129687		0.00133984	0.00129687	0.00103125	0.0011875		0.0018125		0.00163281	0.00121875	0.00142187
VP2	1499	T	C	173	synonymous>Y										0.00159375	0.00192188	0.00295312	0.00194531	0.00233594	0.0341283			0.00141406
VP2	1500	A	G	174	N>D													0.00117188							0.00101172
VP2	1501	A	G	174	N>S		0.00121094											0.00246094	0.00103125	0.00104688	0.00107812		0.00190625	0.00221094
VP2	1502	T	C	174	synonymous>N									0.001125			0.001625	0.00146875	0.0020625	0.00136719
VP2	1505	A	G	175	synonymous>A		0.00195312	0.0011875	0.00126563	0.00184375	0.00121094	0.00251562	0.00104688	0.00159375	0.00120312	0.00154687		0.00429688	0.00196875	0.00179688	0.0029375	0.00213281	0.00276563	0.00121875	0.00208594	0.00153125
VP2	1508	C	T	176	synonymous>G								0.00134375					0.00215625	0.00175	0.00107812
VP2	1510	T	C	177	M>T							0.00104688		0.00195312				0.001375	0.00176562	0.00128125	0.00170312	0.00145313	0.00182031	0.00175781	0.00129687
VP2	1513	G	A	178	G>E																	0.00109375
VP2	1514	G	A	178	synonymous>G				0.00175	0.001125	0.00233594	0.00326563	0.00341406	0.00515625	0.00539062	0.00290625	0.00328125	0.0030625	0.00590625		0.0024375	0.00157813	0.00178125	0.0020625	0.0025	0.00225
VP2	1516	T	C	179	V>A			0.0011875	0.00109766			0.00126563	0.00103906	0.00125781	0.00119531	0.00112109		0.00140625	0.00115625	0.00180469			0.0015	0.00192188	0.00114844	0.00119531
VP2	1517	G	A	179	synonymous>V																		0.00110938
VP2	1520	T	C	180	synonymous>G		0.001125	0.00145313	0.00139063	0.0014375	0.00140625	0.00178906	0.00242188	0.00220313	0.00171875	0.00102344	0.00164062	0.00160938	0.0030625	0.00245313	0.00335156	0.0015	0.00265625	0.003375	0.00202344	0.00123438
VP2	1522	T	C	181	V>A		0.00171875	0.00129687	0.00168359		0.00201562	0.00184375	0.0018125	0.0025625	0.001875	0.00224219	0.00252344	0.0025	0.00321875	0.00454688	0.0019375	0.00110156	0.00153906	0.002	0.00133594
VP2	1523	T	C	181	synonymous>V		0.00157031		0.00128906				0.00125		0.00110938		0.00141406	0.00260937	0.00292188		0.00186719		0.00203906		0.0014375
VP2	1526	A	G	182	synonymous>G										0.0016875	0.00117578	0.00146875		0.00152344	0.00126563		0.00107812	0.00116406	0.00101562	0.00178125
VP2	1526	A	T	182	synonymous>G																0.00148437	0.00171875	0.00170312
VP2	1528	A	G	183	N>S		0.00151563	0.00132813	0.001125	0.00128516	0.00128125	0.00198438	0.001625	0.00195312		0.00199219	0.0021875	0.00128125	0.002	0.0016875	0.00240625	0.00115625	0.00214844	0.00196875	0.00216406
VP2	1531	T	C	184	L>P		0.00166016	0.00137109	0.00205469	0.00158594	0.00146875	0.0021875	0.00164062	0.0023125	0.00107031	0.00123438	0.00204687	0.00335156	0.00289844	0.00119531	0.00189062	0.00178906	0.00228906	0.00179688	0.002625	0.00141406
VP2	1532	C	T	184	synonymous>L										0.00120312		0.00125	0.00107812		0.00102344
VP2	1533	A	G	185	T>A		0.0015		0.00105078	0.00109375		0.00117578		0.00129687	0.00111719	0.00117969	0.00145313	0.00144531	0.00276563		0.00134375	0.00148437	0.0031875	0.00182031	0.00166797
VP2	1535	C	T	185	synonymous>T													0.00107812	0.0011875
VP2	1536	A	G	186	I>V							0.00112109	0.00220313	0.00275	0.002375	0.00303125	0.00451563	0.00846875	0.0064375	0.00180469		0.001125
VP2	1537	T	C	186	I>T													0.00175781	0.00151563	0.00132813				0.00115625	0.00109766
VP2	1538	T	C	186	synonymous>I			0.00109375	0.00121094					0.002125	0.00132031	0.00134375	0.00196094	0.00176562	0.00170312	0.00173438	0.00135937		0.001875	0.00128906	0.00148828
VP2	1539	T	C	187	F>L														0.00151563
VP2	1540	T	C	187	F>S				0.0011875		0.00153125	0.00121094	0.00177344			0.00126172	0.0014375	0.00139844	0.00139844	0.00109375	0.00251562	0.00167969	0.00115625		0.00116797
VP2	1544	C	T	188	synonymous>P													0.0015
VP2	1546	A	C	189	H>P		0.00114062											0.00132813
VP2	1546	A	G	189	H>R		0.00111719		0.00115625		0.00107422	0.00117188		0.00153906		0.00114062	0.00153906	0.00197656		0.00175		0.001625	0.00110938	0.00138281
VP2	1547	C	T	189	synonymous>H													0.00251562	0.00171094	0.00107422			0.00226562
VP2	1549	A	G	190	Q>R													0.0014375	0.00100781				0.00139063
VP2	1550	A	G	190	synonymous>Q									0.00140625		0.00153125	0.00107031	0.00389062	0.00176562				0.0015	0.00100781
VP2	1551	T	C	191	W>R		0.00120312										0.00175	0.00182812	0.00125	0.00142187		0.00121875	0.00130078	0.00142187	0.00122656
VP2	1552	G	A	191	W>*													0.00105469
VP2	1554	A	G	192	I>V		0.001625	0.00174219	0.002125	0.00224219	0.0024375	0.00195312	0.00265625	0.00207813	0.00304687	0.00278125	0.00253125	0.00295312	0.0025	0.00195312	0.00264062	0.00189062	0.00157813	0.00221875	0.00221875	0.00203125
VP2	1555	T	C	192	I>T		0.00214844	0.00159375	0.00251562	0.0011875	0.00158594	0.00216406	0.00107812	0.00251562	0.00228125	0.00175	0.00178125	0.00171875	0.00176562	0.00175	0.00203125	0.00159375	0.002875	0.00253125	0.0025	0.0015
VP2	1556	C	T	192	synonymous>I									0.00117188			0.00110156			0.00165625		0.00114062	0.0015	0.00105469
VP2	1557	A	G	193	N>D		0.00198438		0.0016875	0.00141406	0.00115625	0.00111719	0.0010625	0.00177344	0.00135937	0.00130469	0.00225	0.0021875	0.00121094	0.00153125	0.00264844	0.00210938	0.0015625	0.00172656	0.00252344
VP2	1558	A	G	193	N>S			0.00125		0.00134766		0.00100391			0.00104688			0.00112109	0.00153125	0.00134375	0.0021875	0.001375	0.00222656	0.00101562	0.00192969	0.00103125
VP2	1561	T	C	194	L>P												0.00115625	0.00132031		0.0011875	0.00165625	0.00107422	0.001125		0.00107812
VP2	1562	A	G	194	synonymous>L				0.00129297					0.00147656		0.00132031		0.00117188	0.00229687	0.00120703	0.001125	0.00104688	0.00160938	0.00207031	0.00152344	0.00104688
VP2	1565	C	T	195	synonymous>R													0.00113281					0.00128125
VP2	1566	A	G	196	T>A								0.00149219							0.00102344			0.00144531	0.00135937
VP2	1568	C	T	196	synonymous>T									0.00102344								0.00132813
VP2	1569	A	G	197	N>D							0.00114844			0.00105469			0.00179688				0.00140625	0.00196875		0.00191406
VP2	1571	T	C	197	synonymous>N		0.00138281	0.00123438		0.00108594		0.00104688	0.00142969		0.00165625	0.0025625	0.00189062	0.00219531	0.00184375	0.00316406			0.00146094		0.00167188
VP2	1573	A	G	198	N>S							0.00107422			0.00117969		0.00146875	0.00176562		0.00119922						0.00102734
VP2	1574	T	C	198	synonymous>N										0.00117188		0.00185938	0.00376562	0.00221875	0.00132031	0.00247656	0.00125781	0.0026875	0.00165625	0.0016875
VP2	1575	A	G	199	S>G		0.00120703										0.00189062		0.00116406
VP2	1577	T	C	199	synonymous>S		0.00136719	0.0011875	0.00119531	0.00201562		0.00132813	0.00135156	0.00223438	0.00148437	0.00212109	0.00175	0.00201562	0.00217969	0.00223438	0.00133594	0.00257813	0.00296875	0.0024375	0.00267188	0.00234375
VP2	1580	T	C	200	synonymous>A		0.0035	0.00220313	0.00208594	0.00209375	0.00292188	0.00225	0.00275	0.00303125	0.0031875	0.00309375	0.00375	0.005	0.0051875	0.00559375	0.00175	0.00192969	0.00217969	0.00207813	0.00266406	0.00233594
VP2	1581	A	G	201	T>A		0.00125		0.00139844			0.001375	0.00132813				0.00253906	0.00146875	0.00167188	0.00124219	0.00169531			0.0016875	0.00176562
VP2	1584	A	G	202	I>V												0.00103906
VP2	1585	T	C	202	I>T												0.00126563
VP2	1586	T	C	202	synonymous>I					0.00142969		0.00129687		0.00142969	0.00104688	0.00144531	0.0029375	0.004125	0.00232813	0.00128125		0.0010625	0.0018125	0.00111719	0.00136719
VP2	1588	T	C	203	V>A		0.00120703	0.00120312	0.00121094			0.00144141	0.00138281	0.00115625		0.00113672	0.00146094	0.00117188	0.00215625		0.0020625	0.00177344	0.00110547	0.00152344	0.00175781	0.00109375
VP2	1589	G	A	203	synonymous>V																				0.00123438
VP2	1590	A	G	204	M>V		0.00132031	0.00217969	0.00174219	0.00154687		0.00205469	0.00261719	0.00108594	0.00191406	0.00135937	0.00166406	0.001875	0.00234375	0.00185156	0.00204687	0.001375	0.00259375	0.00233594	0.00166406	0.00194531
VP2	1591	T	C	204	M>T		0.00139063		0.0013125	0.00110938	0.00110156	0.00170312		0.0011875	0.00128125	0.00155078	0.00107812	0.00266406	0.0024375	0.00146875	0.00124219	0.00185938	0.002125	0.00128125	0.00169531
VP2	1594	C	T	205	P>L									0.00109375
VP2	1595	A	G	205	synonymous>P		0.00213281	0.00164844	0.00171094	0.001875	0.00126953	0.00153125	0.00160938	0.00151563	0.00167969	0.00197656	0.00289844	0.00479688	0.0035625	0.002625	0.00209375	0.00175	0.00264844	0.003125	0.00275	0.00207813
VP2	1596	T	C	206	Y>H					0.00112109				0.00105469	0.00102344	0.00117188	0.00117969				0.00200781		0.00203125	0.00127344	0.00108984
VP2	1597	A	G	206	Y>C		0.00110547		0.0010625	0.00101172			0.00164844						0.00110156	0.00110156	0.00199219	0.00165625	0.002	0.00166406	0.00103906	0.001125
VP2	1598	C	T	206	synonymous>Y						0.00107422	0.0016875	0.00217187	0.00515625	0.0051875	0.00271094	0.00544531	0.00601562	0.00255469
VP2	1599	A	G	207	T>A		0.00176562	0.00174219	0.00126953	0.00114062	0.001125	0.00170312	0.00146875	0.0015	0.00172656	0.00171094	0.00192969	0.00161719	0.00163281	0.00207813	0.00173438	0.00105078	0.00213281	0.00163281	0.00234375	0.00123047
VP2	1600	C	T	207	T>I			0.0015625									0.0010625
VP2	1601	C	T	207	synonymous>T									0.00138281				0.00123047	0.00148437	0.00108984	0.0024375	0.00402344	0.0045	0.00171094	0.00201562	0.00151563
VP2	1602	A	G	208	N>D		0.00146875		0.00158594			0.00153125	0.00109375	0.00113281	0.00129687	0.00110547	0.00135937	0.00116797	0.00179688	0.00166406		0.00166406	0.00119531	0.00147656	0.00175391	0.00128906
VP2	1603	A	G	208	N>S				0.00120312			0.00130469		0.00132031	0.00153125	0.00126953	0.00123438			0.00163281	0.00204687	0.00126563	0.00170312	0.00189844	0.00112891
VP2	1604	C	T	208	synonymous>N												0.00146875	0.00209375	0.00196875	0.00105469			0.00110547	0.00157813
VP2	1605	A	G	209	S>G		0.00109375							0.00166406	0.00128125	0.00104688	0.00128906	0.00121875	0.00203906	0.00174219	0.00185938		0.0013125	0.00122656	0.00127734
VP2	1607	T	C	209	synonymous>S		0.0015625	0.00142969	0.00139844	0.00184375	0.00129687	0.00214062	0.00165625	0.00113281	0.00273437	0.00190625	0.00182812	0.00178125	0.003	0.00289063	0.00121875	0.00197656	0.00184375	0.00145313	0.00171094	0.00171875
VP2	1608	G	A	210	V>I										0.00255469	0.00171484	0.00328125	0.00421875	0.00314063	0.0293586			0.00112109
VP2	1609	T	C	210	V>A							0.00102344			0.00117188						0.00110938	0.0011875			0.00108984
VP2	1610	A	G	210	synonymous>V	0.00117969	0.0023125	0.00164062	0.001375	0.00117969	0.00171875	0.00226562	0.002	0.00145313	0.00245313	0.00327344	0.003875	0.00465625	0.00296875	0.00296875	0.00257813	0.00271875	0.00326563	0.00348438	0.00192969	0.00207813
VP2	1612	C	T	211	P>L													0.00126563					0.00103906
VP2	1613	T	C	211	synonymous>P		0.00379688	0.00559375	0.00573438	0.00369531	0.00453125	0.00382813	0.00378125	0.002625	0.0029375	0.00771875	0.0140625	0.0162418	0.0089375	0.00414844	0.00339062	0.00490625	0.00939556	0.00354687	0.00341406	0.00217969
VP2	1614	A	G	212	M>V											0.00153125	0.00107031	0.00204687	0.00159375				0.00223438	0.00132031
VP2	1615	T	C	212	M>T		0.00203125	0.00140625	0.00253125	0.00132031	0.00196875	0.00141406	0.00176562		0.00157813	0.00271875	0.00457031	0.00482812	0.00370313	0.00125781	0.00165625	0.00216406	0.00385156	0.00279688	0.00179688	0.001125
VP2	1618	A	G	213	D>G									0.00164062					0.00103906		0.00125		0.00106641	0.00107422
VP2	1619	T	C	213	synonymous>D	0.00124219	0.00229687	0.00197656	0.00120312		0.00175781	0.00215625	0.00157813	0.00167188	0.00305469	0.002375	0.0044375	0.00378125	0.00471094	0.00534375	0.00242188	0.00241406	0.00239062	0.00110938	0.00169141	0.00173438
VP2	1620	A	G	214	N>D										0.00128125			0.00114844
VP2	1621	A	G	214	N>S		0.00102344		0.001625	0.0011875	0.0010625	0.00130078	0.00129687	0.0016875		0.00126563	0.00199219	0.00210938	0.00125781	0.00146875	0.00192188		0.00205469	0.00167969	0.00115625	0.0016875
VP2	1622	C	T	214	synonymous>N												0.0011875	0.00204687	0.0011875
VP2	1623	A	G	215	M>V		0.00207813		0.00126172					0.001125		0.00147266	0.001125	0.00214062	0.0016875		0.00110156	0.0016875	0.00242188	0.00163281
VP2	1624	T	C	215	M>T																		0.00152344		0.00103906
VP2	1626	T	C	216	F>L																0.0010625
VP2	1627	T	C	216	F>S																	0.00110938
VP2	1628	T	C	216	synonymous>F		0.00105859						0.00101562		0.00116406	0.0010625		0.00135156		0.00148437
VP2	1629	A	G	217	R>G								0.00132031		0.00107031			0.00182031			0.00146875		0.00182812		0.00114062
VP2	1633	A	G	218	H>R		0.00107812									0.00107422	0.00160156	0.00263281	0.00215625		0.00154687	0.00198438	0.00208594		0.001125
VP2	1634	T	C	218	synonymous>H		0.00150781		0.00183594	0.00216406	0.00184375	0.00142969	0.00357813	0.00485937	0.00870312	0.017794	0.0389597	0.0530428	0.0299342	0.002625	0.00296875	0.00211719	0.00241406	0.00185938	0.00203125	0.00148437
VP2	1635	A	G	219	N>D													0.00128906			0.00132813			0.00109375
VP2	1636	A	G	219	N>S				0.00173438	0.00114844	0.00147266	0.00134375		0.001875		0.00132813	0.00209375	0.00248437	0.00200781	0.00159766	0.0018125	0.00148437	0.0015	0.00207813	0.00169531	0.00103906
VP2	1637	C	T	219	synonymous>N											0.00114062	0.00164062	0.00239844		0.00234375	0.0025	0.0044375	0.00966283	0.0078125	0.00814063	0.00915625
VP2	1638	A	G	220	N>D													0.00100391	0.00101562		0.00121875
VP2	1639	A	G	220	N>S															0.00124219			0.001125
VP2	1640	C	T	220	synonymous>N						0.00102344				0.00104688		0.0020625	0.00246875	0.00134375	0.00107031			0.001125		0.00110938
VP2	1641	G	A	221	V>I																		0.00119531	0.00129687	0.00125781
VP2	1642	T	C	221	V>A	0.00122656	0.00144922	0.0020625	0.00171875	0.00175781	0.00126953	0.00220313	0.00204687	0.00170312	0.00257813	0.00164062	0.00275	0.0011875	0.00296875	0.00219531	0.00109375	0.0020625	0.00192188	0.00210938	0.00194531	0.001875
VP2	1643	C	A	221	synonymous>V			0.00142187	0.00324219	0.00452344	0.00784375	0.0106805	0.0155428	0.020477	0.0301809	0.0352796	0.0325658	0.0241365	0.0145559		0.00999178	0.010773	0.008625	0.00725	0.0060625	0.00465625
VP2	1643	C	T	221	synonymous>V												0.00163281
VP2	1644	A	G	222	T>A							0.00196875				0.00113281	0.00125	0.00163281	0.00129687	0.00179688	0.00175781		0.00172656	0.002625	0.00159375	0.00142969
VP2	1647	C	T	223	synonymous>L													0.00104688	0.00104688
VP2	1648	T	C	223	L>P		0.003375	0.0035	0.00425	0.00219531	0.00225781	0.00245313	0.00285156	0.00129687	0.00228125	0.0033125	0.00690625	0.00939556	0.004125	0.00171875	0.00205469	0.00269531	0.005375	0.00273437	0.00332812	0.00160156
VP2	1649	A	G	223	synonymous>L			0.00140625	0.00279688	0.00145703	0.00238281	0.00242188	0.00135156		0.00153125	0.00251562	0.00514062	0.0050625	0.00283594	0.00271875	0.00199219		0.00234375	0.00120703	0.00103125
VP2	1649	A	T	223	synonymous>L														0.00127344
VP2	1650	A	G	224	M>V		0.00214844	0.00121094	0.00175			0.00151563		0.0014375	0.00124219	0.00241797	0.00296875	0.00428125	0.00297656	0.00107812	0.00249219	0.00141406	0.00403125	0.00144531	0.00116406
VP2	1651	T	C	224	M>T											0.00126563	0.002375	0.00215625	0.00192188				0.00225		0.00114062
VP2	1653	G	A	225	V>I		0.00116016	0.00340625	0.00375	0.00389844	0.00291406	0.003625	0.0033125	0.00257031	0.00384375	0.00310938	0.003	0.00359375	0.00396875	0.0477796
VP2	1654	T	C	225	V>A		0.00205078	0.00242969	0.0025625	0.00175781	0.00115234	0.00159375	0.00140625	0.00154687	0.00128125	0.00114062	0.0019375	0.00233594	0.00204687	0.00208594	0.00102344		0.00160938	0.00111719	0.00153125	0.00116406
VP2	1655	T	C	225	synonymous>V		0.00204687	0.00185156	0.00184375	0.00175	0.00234375	0.00175	0.00167188	0.00180469	0.00264844	0.00364844	0.0044375	0.00495313	0.00365625	0.00198438	0.00175	0.00134375	0.00173438	0.00179688	0.00174219
VP2	1656	A	G	226	I>V				0.0010625			0.00140625	0.00154687	0.0014375		0.00142969	0.001625	0.00202344	0.00129687				0.0010625		0.00128125
VP2	1657	T	C	226	I>T		0.00171875	0.00178906	0.00200781	0.00135156	0.00176562	0.00252344	0.00175	0.0013125	0.00188281	0.00169141	0.00124219	0.00213281	0.00157813	0.00190625	0.00239062	0.00146094	0.00304687	0.00178125	0.00286719	0.00201562
VP2	1658	C	T	226	synonymous>I															0.0014375
VP2	1661	A	G	227	synonymous>P											0.00130469	0.00124219	0.00195312	0.00225	0.00178125		0.00121875	0.00292969	0.00101562	0.00127734	0.00148437
VP2	1662	T	C	228	F>L												0.00149219	0.00107031	0.00148437			0.001375	0.00157813	0.001375	0.00103906
VP2	1663	T	C	228	F>S									0.00107812			0.00128906					0.00103906	0.00178125
VP2	1664	T	C	228	synonymous>F									0.00108594			0.00135937	0.00179688			0.0011875		0.0015	0.00165625	0.00103906
VP2	1666	T	C	229	V>A					0.00141406		0.00134375	0.00121094	0.0014375	0.00161719	0.00117188	0.0010625	0.00140625	0.00165625	0.00125	0.00147656	0.00159375		0.00179688	0.00129687	0.00104297
VP2	1667	A	G	229	synonymous>V			0.00133594		0.00116406	0.00109375	0.00112109		0.00115625	0.00146094	0.001375	0.00151563	0.00111719	0.00171094	0.00188281	0.00116406		0.001125	0.00117188
VP2	1669	C	T	230	P>L													0.00120312
VP2	1670	G	A	230	synonymous>P								0.0010625			0.00100781	0.00154687	0.00122656	0.00203125		0.00119531		0.00126172
VP2	1671	C	T	231	synonymous>L										0.00111719		0.00111719	0.00221875					0.00126563
VP2	1672	T	C	231	L>P		0.00104297												0.00105469	0.00110156		0.00103906	0.0010625	0.00105469
VP2	1673	A	G	231	synonymous>L		0.00189062								0.001375	0.00167188		0.00260937		0.00116406	0.00189062	0.0011875	0.00146875	0.00115625	0.00133984
VP2	1675	A	G	232	D>G									0.00108594						0.00171094	0.0013125			0.0015
VP2	1676	T	C	232	synonymous>D								0.00133594				0.00116406	0.00169531	0.00175		0.00101562		0.00107812	0.0015625
VP2	1677	T	C	233	Y>H																		0.0013125
VP2	1678	A	G	233	Y>C									0.0015				0.00103125	0.00101172		0.0014375		0.00189844	0.00114062	0.00135156
VP2	1679	C	T	233	synonymous>Y												0.00129687	0.00153125
VP2	1680	T	C	234	C>R		0.00109375	0.00170312	0.00157031	0.00117578			0.00154687	0.0015625		0.00119531	0.00121094	0.00133594	0.00107812	0.00182812	0.0019375	0.00164844	0.00139063	0.00123438	0.00147656	0.00123438
VP2	1682	C	T	234	synonymous>C															0.00200781		0.00103906	0.00153125			0.00122656
VP2	1685	T	C	235	synonymous>P	0.00115625	0.00228906		0.00103906	0.00151563		0.00139063	0.00175781	0.00148437	0.00223438	0.00164062	0.00189844	0.00145313	0.00207813	0.00238281	0.00144531	0.0013125	0.00190625	0.00120312	0.0015	0.00160938
VP2	1688	G	A	236	synonymous>G								0.00126563	0.00115625		0.001125	0.00117188		0.00153125	0.00232813
VP2	1689	T	C	237	S>P		0.00207813	0.00222656	0.00235156	0.00110938	0.00182031	0.00195312	0.00225781	0.002125	0.00279688	0.00171875	0.00158594	0.00215625	0.00133594	0.0025	0.0030625	0.00276563	0.00190625	0.00259375	0.00270312	0.00155469
VP2	1691	C	T	237	synonymous>S				0.00185156	0.00251562	0.00180469	0.00207813	0.00190625	0.00217187	0.00153906	0.001375	0.0015625	0.00164062	0.00164844	0.0054375
VP2	1692	A	G	238	T>A		0.00128906		0.00114062	0.00107031	0.00121875	0.00122656	0.00188281	0.00153125	0.00153125	0.00107812	0.00129687	0.0014375	0.0018125	0.00116406	0.00209375	0.00129687	0.00189062	0.00248437	0.00131641	0.00124219
VP2	1694	C	T	238	synonymous>T																			0.00102344
VP2	1695	A	G	239	T>A		0.00125		0.00146875			0.00174219			0.00103125		0.00114844	0.00159375	0.0011875	0.00153125	0.00109375		0.00192188	0.00213281		0.00151563
VP2	1696	C	A	239	T>K																			0.00191406
VP2	1697	G	A	239	synonymous>T								0.00127344	0.00154687	0.00203125					0.00119531			0.001125		0.00154687	0.00121875
VP2	1698	T	C	240	Y>H		0.00190625	0.00453125	0.0046875	0.00444531	0.003	0.0046875	0.00435938	0.00739062	0.00915625	0.00785938	0.00740625	0.00873438	0.00654687	0.00698437	0.00144531	0.001625	0.00149219	0.00170312	0.00146094
VP2	1699	A	G	240	Y>C							0.00132813	0.00125781	0.0015	0.00120312		0.00108594	0.00115625	0.00128125		0.0010625		0.00134375	0.00157031
VP2	1699	A	T	240	Y>F					0.00104688
VP2	1700	C	T	240	synonymous>Y									0.0019375	0.00111719	0.00136328	0.00142969	0.00178125	0.00120312	0.00133594	0.00115625	0.00158594	0.0019375	0.00147656		0.00102344
VP2	1701	G	A	241	V>I																		0.00132031
VP2	1702	T	C	241	V>A		0.00109375	0.00174219	0.00153906	0.00170312	0.00129687	0.00219531	0.00203125	0.002	0.00275	0.0024375	0.00209375	0.00229687	0.00228125	0.00153906	0.0025	0.00153906	0.00207031	0.00250781	0.00285937	0.00226562
VP2	1706	A	G	242	synonymous>P		0.00100391					0.00128125		0.001875	0.00140625	0.00169531		0.00171094		0.00153125	0.00173438		0.00155469		0.0010625
VP2	1709	T	A	243	synonymous>I															0.00350781
VP2	1709	T	C	243	synonymous>I		0.00108594						0.00111719		0.0011875	0.00113281	0.00112109	0.00204687	0.001875	0.00135937
VP2	1710	A	G	244	T>A								0.00101172
VP2	1712	G	A	244	synonymous>T			0.00114062								0.00130078		0.00145313					0.0010625	0.00113281
VP2	1713	G	A	245	V>I			0.00175	0.00166406				0.0015625	0.00123438		0.0010625		0.00115625
VP2	1714	T	C	245	V>A		0.00164062					0.00158594	0.0011875	0.00102344		0.00210938	0.00110938	0.00142969	0.00245313	0.00157813	0.00192188	0.00159375	0.0031875	0.00221094	0.00189062	0.00137109
VP2	1715	C	T	245	synonymous>V																				0.00105469
VP2	1716	A	G	246	T>A							0.00101172					0.00125	0.00109375			0.0025625		0.00109375	0.00140625		0.00110938
VP2	1718	G	A	246	synonymous>T																		0.00110156
VP2	1719	A	C	247	I>L				0.00224219	0.00152344	0.00128906	0.00258594		0.00244531	0.0010625			0.001125		0.00264062
VP2	1719	A	G	247	I>V		0.00121484							0.00125	0.00125781	0.00158984	0.00182812	0.00204687	0.00126563	0.00108594	0.00170312		0.00125		0.00125
VP2	1719	A	T	247	I>L						0.001375
VP2	1720	T	C	247	I>T											0.00114453						0.00121875	0.00114062
VP2	1721	A	G	247	I>M		0.001875	0.00241406	0.00209375	0.00161719	0.00170312	0.00207813	0.00155469	0.00204687	0.00103125	0.00128906	0.00164062	0.002125	0.0015				0.0013125		0.00113672
VP2	1727	A	G	249	synonymous>P		0.0014375								0.00123438	0.00178125	0.00114844	0.00247656	0.00197656	0.00154687			0.00182812		0.00109375
VP2	1728	A	G	250	M>V													0.00124219					0.00133594
VP2	1729	T	C	250	M>T											0.0015	0.00128906	0.00128906					0.00188281		0.00142969	0.0013125
VP2	1731	T	C	251	C>R		0.00145313	0.00103125	0.00142187	0.00113672	0.00114062	0.00277344				0.00173047		0.00146875	0.00214062	0.00178125	0.0026875	0.00151563	0.00139844		0.00235156	0.00117969
VP2	1733	T	C	251	synonymous>C		0.0013125	0.00108594	0.0018125	0.00234375	0.00197656	0.00150781	0.001125	0.00125	0.00152344	0.00183594	0.0016875	0.00253906	0.0024375	0.00192188	0.002625	0.00220313	0.002125	0.00232813	0.00160938	0.00155469
VP2	1734	G	A	252	A>T			0.00159375	0.00126563
VP2	1735	C	T	252	A>V			0.00134375	0.00310156	0.00353906	0.00353125	0.00434375	0.00420312	0.00640625	0.00585938	0.00269922	0.00466406	0.00678125	0.00270312					0.00132813
VP2	1736	C	T	252	synonymous>A													0.00153906					0.00167188
VP2	1737	G	A	253	E>K														0.00110156
VP2	1738	A	G	253	E>G									0.00145313	0.00104688			0.0014375		0.00103125	0.00207813	0.00125		0.00110938
VP2	1739	G	A	253	synonymous>E											0.00124219	0.0011875	0.00214844		0.00117188
VP2	1740	T	C	254	Y>H													0.00100781
VP2	1741	A	G	254	Y>C									0.00124219			0.001375		0.00117969	0.0014375				0.00136719	0.00114844
VP2	1742	C	T	254	synonymous>Y													0.00148437	0.00190625	0.00209375			0.0020625			0.0014375
VP2	1743	A	G	255	N>D													0.00263281	0.00121875	0.00114844	0.00139063		0.00123438	0.00159375
VP2	1744	A	G	255	N>S		0.00303906	0.00245313	0.00334375		0.00167188	0.00185938	0.001875	0.00192969	0.00309375	0.00229687	0.00495313	0.0070625	0.00329687	0.00225	0.00115625	0.001875	0.00388281	0.00194531	0.00239062	0.00143359
VP2	1745	T	C	255	synonymous>N		0.00228125	0.00192188	0.00242969		0.00117969	0.00119922				0.00229687	0.00275	0.00559375	0.00270312	0.00137109	0.00108594	0.00133594	0.00220313		0.00160938	0.001375
VP2	1749	T	C	257	synonymous>L		0.00155469		0.00184375	0.00124219	0.00158594	0.00124609	0.00125	0.0018125	0.001125	0.00128516	0.00146875	0.00164062	0.00159375	0.00219531	0.0015625	0.0014375	0.001875	0.00175	0.001625	0.00151563
VP2	1750	T	C	257	L>S															0.0010625			0.00130469	0.00105469
VP2	1751	A	G	257	synonymous>L	0.00113281	0.00160938	0.00235937	0.00253906	0.002625	0.00229687	0.00351562	0.00253125	0.00328125	0.0029375	0.00278125	0.0034375	0.00392187	0.00389844	0.0472862	0.001875	0.00203906	0.0016875	0.00276563	0.00210938	0.00164062
VP2	1752	C	T	258	R>C													0.00100781
VP2	1754	T	C	258	synonymous>R						0.00100781			0.002	0.00229687	0.0018125	0.00178906	0.0021875	0.00329687	0.00106641	0.00177344	0.0010625	0.00133594	0.00142969		0.00166406
VP2	1755	T	C	259	synonymous>L														0.00120312	0.00125781			0.00125
VP2	1757	A	G	259	synonymous>L									0.00115625	0.001125	0.00126953	0.00153125	0.0019375	0.00202344	0.00179688	0.00189062	0.00160938	0.00178906	0.00175	0.00126563
VP2	1760	A	G	260	synonymous>A		0.00250781		0.00209375	0.00129687	0.00151563	0.001875	0.00178125	0.0024375	0.00246875	0.00189062	0.00314844	0.003875	0.00321875	0.00248437	0.00278125	0.0016875	0.00301563	0.00203906	0.00280469	0.00230469
VP2	1761	G	A	261	G>R													0.00120312		0.00130469
VP2	1763	G	A	261	synonymous>G									0.00139063	0.00157813					0.00107031			0.00113281			0.00102344
VP2	1764	C	T	262	H>Y																0.0407072	0.0501645	0.0619243	0.0453536	0.03125	0.0355674
VP2	1765	A	G	262	H>R		0.00201562		0.00126563	0.002		0.00185938	0.002		0.00251562	0.001875	0.00260156	0.00175	0.00359375	0.00238281	0.00248437	0.00178125	0.00135937	0.00223438	0.0020625	0.00146875
VP2	1766	C	T	262	synonymous>H										0.0010625		0.00108594	0.00132813		0.00105078	0.00309375	0.00321875	0.00275	0.00154687	0.00175
VP2	1768	A	G	263	Q>R	0.00125	0.00180469	0.00175	0.00188281	0.001375	0.00159375	0.00265625	0.00154687	0.00196875	0.00173438	0.00146875	0.0016875	0.00236719	0.00273437	0.0019375	0.0020625	0.00171875	0.00184375	0.00197656	0.00314063	0.00160938
VP3	1772	C	T	1	synonymous>G													0.00215625	0.001375	0.00217187
VP3	1773	T	C	2	synonymous>L		0.00121875	0.0018125	0.00133594	0.00105078		0.00132422	0.00227344	0.00150781	0.00160938	0.00163281	0.00175	0.00203906	0.0033125	0.00160156	0.00178906		0.00134375	0.00110156	0.00149609	0.00136719
VP3	1775	A	G	2	synonymous>L		0.00138281	0.00119531		0.00214062	0.002	0.00209375	0.00161719	0.002	0.00225	0.0019375	0.00147656	0.00225	0.00242188	0.00338281	0.00217187	0.00229687	0.00254688	0.0016875	0.00221094
VP3	1778	A	G	3	synonymous>P		0.00170312	0.00133594		0.00158203	0.0011875	0.00133594	0.00103125		0.001625	0.00142187	0.00176562	0.00465625	0.00289063	0.00275781	0.00171875	0.00103125	0.00151563	0.00119531	0.00177734	0.00113281
VP3	1779	A	G	4	T>A											0.00104688	0.00115625	0.00167188			0.00129687		0.00134766	0.0016875		0.00103125
VP3	1780	C	T	4	T>I													0.0011875
VP3	1781	C	T	4	synonymous>T												0.0014375	0.00335938
VP3	1782	A	G	5	M>V		0.00111719	0.0011875				0.00114844			0.001375		0.00155469	0.00240625	0.00142969	0.00121094	0.00124219		0.00164062	0.00124219
VP3	1783	T	C	5	M>T									0.00120312				0.0014375		0.00125			0.00127344
VP3	1785	A	G	6	N>D			0.00102344				0.00174219				0.00134375	0.00207031	0.00177344	0.00170312	0.00201562	0.00125		0.00216406	0.00150781	0.0013125
VP3	1786	A	G	6	N>S										0.00119531						0.00192188			0.0010625	0.00141406
VP3	1787	T	C	6	synonymous>N	0.00107812	0.00191406	0.00128125	0.00133594	0.00105469	0.00110938	0.001375	0.00114062	0.00161719	0.00164844	0.00240625	0.00221875	0.00284375	0.002875	0.00620313	0.002	0.00195312	0.00224219	0.002	0.00200781	0.00114062
VP3	1790	T	C	7	synonymous>T		0.00232031	0.00102344	0.0016875	0.0011875	0.00113281	0.0011875	0.002	0.00220313	0.00175781	0.00209375	0.002375	0.00226562	0.00278125	0.00245313	0.00198438		0.0019375		0.00132813
VP3	1791	C	A	8	P>T																				0.00109375
VP3	1792	C	A	8	P>Q																				0.00340625
VP3	1793	G	A	8	synonymous>P									0.00111719	0.0013125	0.00151563	0.0015	0.00209375	0.001875
VP3	1796	G	A	9	synonymous>G														0.00101953
VP3	1797	A	G	10	S>G		0.00132031					0.0013125			0.00251562	0.00113281	0.00124219	0.00170312	0.00151563	0.00164844	0.00219531		0.00207813	0.00199219	0.00117188	0.00100781
VP3	1799	C	T	10	synonymous>S																	0.00139063
VP3	1800	T	C	11	C>R		0.0026875	0.00110938	0.00140625	0.00129687	0.00127344	0.0014375		0.00121875	0.00188281	0.00169531	0.00205469	0.00232813	0.0035	0.00139844	0.00213281	0.0021875	0.00285937	0.00150781	0.00166406	0.00151563
VP3	1802	T	C	11	synonymous>C	0.00125781	0.00254688	0.00148437	0.00192188	0.00269531	0.00147656	0.003125	0.00303125	0.00178906	0.003375	0.00259375	0.00238281	0.00217969	0.0039375	0.00321875	0.00217187	0.00197656	0.00228125	0.00171875	0.00235156	0.00173438
VP3	1804	A	G	12	Q>R										0.00114844			0.00127344	0.00108594	0.00161719	0.00122656		0.00107812		0.0010625
VP3	1805	A	G	12	synonymous>Q															0.001125		0.00145313	0.00103516
VP3	1805	A	T	12	Q>H																				0.00115234
VP3	1806	T	C	13	F>L												0.00135937		0.00154687		0.00114062
VP3	1808	T	C	13	synonymous>F												0.00103125	0.00117578					0.00160938	0.00128906	0.00107031
VP3	1809	C	T	14	synonymous>L													0.00178125
VP3	1810	T	C	14	L>P				0.00136719		0.0011875	0.00120312	0.00138281	0.00104688	0.00166406	0.00119922	0.00199219	0.00132813	0.0019375	0.00178906	0.00109375		0.00219531	0.00151563	0.00108984
VP3	1812	A	G	15	T>A		0.00107812	0.001125		0.00101562		0.00174219	0.0010625	0.00175781		0.00132031	0.00125	0.00202344	0.00303125	0.00214062	0.00189062	0.00261719	0.00215625	0.00158594	0.00167969
VP3	1814	A	G	15	synonymous>T		0.00185938		0.00184375	0.0035	0.00451563	0.00489844	0.00664063	0.005625	0.0048125	0.00624219	0.005375	0.00740625	0.0044375	0.002125	0.00205469	0.00190625	0.00222656	0.00214844
VP3	1815	T	C	16	S>P		0.00106641	0.001125	0.00126563	0.00128125	0.00108594	0.00108984	0.00114062	0.00108594	0.00135937	0.00134375	0.00171094	0.00328906	0.0018125	0.00217187	0.00180469	0.00128125	0.00232813	0.00151563	0.00101172	0.00119531
VP3	1817	A	G	16	synonymous>S		0.00228906	0.00133984	0.00202344		0.0013125	0.00203125	0.0014375	0.0029375	0.00208594	0.00221875	0.00223438	0.00379688	0.00228906	0.00275781	0.00185156	0.00158594	0.00158594	0.0015625	0.00157031	0.00123047
VP3	1819	A	G	17	D>G		0.002125	0.002	0.00300781	0.0019375	0.0016875	0.0015625	0.00284375	0.00196094	0.00229687	0.00184766	0.00226562	0.00184375	0.0031875	0.00135937	0.00252344	0.00210156	0.00184375	0.00103125	0.0023125
VP3	1820	C	T	17	synonymous>D						0.00105078			0.00114844	0.00135156		0.00163281	0.00165625		0.00222656		0.00123438	0.00109375	0.00269531	0.0033125	0.00451563
VP3	1822	A	G	18	D>G		0.00103516		0.00130469	0.00135937	0.00130859	0.00164062	0.00157031	0.00234375	0.00107812	0.00228906	0.00189062	0.00215625	0.00289063	0.0021875	0.00290625	0.00228906	0.002	0.00173438	0.0016875	0.0018125
VP3	1823	C	T	18	synonymous>D													0.00117969
VP3	1824	T	C	19	F>L		0.00152344	0.00203125	0.00165625	0.00158594	0.0013125	0.00207031	0.00116406	0.00119531	0.001625	0.00166406	0.002	0.00210938	0.00196094	0.00210156	0.00203125	0.002	0.00154687	0.00285156	0.00177344	0.00132813
VP3	1826	C	T	19	synonymous>F														0.00129687				0.00158594
VP3	1828	A	G	20	Q>R							0.00117188		0.00105469				0.00240625	0.00240625	0.00128125	0.00122656		0.0020625	0.00104688
VP3	1829	A	G	20	synonymous>Q								0.001625	0.0011875	0.00185938	0.00109375	0.00146875	0.00271094		0.00189062		0.00154687	0.00345313	0.00278125	0.00417187	0.0035
VP3	1830	T	C	21	S>P				0.0013125		0.001375	0.00129687	0.00121875			0.00124609	0.00148437	0.00209375	0.0015625	0.00125781	0.00134375		0.0025625	0.0010625	0.00157031
VP3	1830	T	G	21	S>A																				0.00137109
VP3	1832	A	G	21	synonymous>S		0.00167188		0.001125					0.001625	0.00202344	0.00125781	0.00195312	0.00172656	0.00215625	0.00176562	0.00801563	0.028824	0.0967516	0.206826	0.291488	0.348345
VP3	1835	A	G	22	synonymous>P		0.00119922		0.00128516			0.001125		0.00210156	0.00171094	0.00109375	0.00151563	0.00104688	0.00164062	0.00121875	0.00119531	0.00176562	0.00142187	0.00114062	0.00133594	0.00148437
VP3	1836	T	C	23	S>P		0.00214062	0.00165625	0.00182812	0.00196875		0.00124219	0.00104688	0.00298437	0.00102344	0.00199219	0.00209375	0.00282031	0.0021875	0.00121875	0.0015625			0.0014375	0.0019375	0.00172656
VP3	1838	C	T	23	synonymous>S								0.00103125	0.001375			0.00107422	0.00120312	0.00127344	0.00176562	0.00115625		0.00120703
VP3	1840	C	T	24	A>V																0.0010625
VP3	1841	C	T	24	synonymous>A												0.0010625	0.00272656
VP3	1842	A	G	25	M>V		0.00195312	0.00167188	0.00132031		0.00133594	0.00114844	0.00121875	0.00179688		0.00173047	0.0024375	0.00182812	0.00225	0.00110156	0.0014375	0.001875	0.00215625	0.00153125	0.00170703	0.00167969
VP3	1843	T	C	25	M>T									0.00120312	0.00138281			0.00107031		0.00107812				0.0015625
VP3	1847	G	A	26	synonymous>P			0.00138281			0.00135156	0.00161328	0.00240625	0.00184375	0.00239062	0.00191797	0.00329687	0.00370313	0.002375	0.00210156	0.00108594				0.00119531
VP3	1849	A	G	27	Q>R																0.00117969			0.00101562
VP3	1850	A	G	27	synonymous>Q			0.00111719				0.00130469		0.00104688		0.00115234		0.00122656	0.00116406	0.00132031			0.0026875	0.00290625	0.002125
VP3	1851	T	C	28	Y>H													0.00113281			0.00155469
VP3	1852	A	G	28	Y>C								0.00111719	0.00110938		0.00103125	0.0010625	0.001625					0.00128906
VP3	1853	T	C	28	synonymous>Y		0.002125		0.00135156	0.00221875	0.00101562	0.00198438	0.00121094	0.00153125	0.00164062	0.00232813	0.00246875	0.0026875	0.00367187	0.00364844	0.00117969	0.00175	0.001875	0.00259375	0.00203906	0.00165625
VP3	1855	A	G	29	D>G		0.00182031	0.001125	0.00160156	0.00109375	0.00107812	0.00264844	0.00221094	0.00124219	0.00225	0.001625	0.00114844	0.00121875	0.00171875	0.00151563	0.0025625	0.00178906	0.00228125	0.001375	0.00219531	0.00166406
VP3	1856	C	T	29	synonymous>D				0.00126563					0.00127344	0.00175	0.00145313	0.00165625	0.00150781	0.00203125	0.002	0.00121875		0.0015	0.0013125	0.00108594	0.00134375
VP3	1857	G	A	30	V>I										0.0014375		0.00117188	0.00209375
VP3	1858	T	C	30	V>A	0.0015625	0.00171094	0.00160938	0.00240625	0.00167188	0.00182031	0.0025	0.002625	0.00273437	0.0025625	0.00232422	0.00282812	0.00238281	0.00273437	0.00153125	0.00226562	0.00284375	0.00198438	0.00280469	0.00259375	0.00182812
VP3	1859	C	T	30	synonymous>V										0.00114062		0.00103125	0.00171094		0.00215625
VP3	1860	A	G	31	T>A				0.00135937			0.00139844	0.00115625	0.00195312	0.00161719	0.00130859	0.00108594	0.00165625		0.00160156	0.00182031	0.00190625	0.00109375	0.00123438	0.00118359
VP3	1862	A	G	31	synonymous>T		0.00224219	0.00267188	0.00175781	0.00191406	0.00161719	0.00203125	0.0024375	0.00215625	0.00254688	0.00203125	0.00207031	0.00357813	0.0030625	0.00278125	0.00329687	0.00221875	0.00278125	0.0014375	0.00155469	0.00217187
VP3	1865	A	G	32	synonymous>P		0.00146875		0.00103125		0.00110938	0.00186719	0.00157813	0.0018125	0.00195312	0.00164844	0.00185938	0.00246875	0.00172656	0.00189844	0.00220313	0.00184375	0.00196875	0.00175781	0.00128125	0.00158594
VP3	1867	A	G	33	E>G		0.00121875	0.00160156		0.00114062	0.00123828	0.00110938	0.0015625	0.00160938	0.00148437	0.00123828	0.00110156	0.00201562	0.00242188	0.00235937	0.00195312		0.00167188	0.00214844	0.00175781	0.00134375
VP3	1868	G	T	33	E>D																				0.00161328
VP3	1869	A	G	34	M>V			0.0010625	0.0011875	0.00142969		0.00111328	0.00167969	0.00120312	0.00164844	0.00113672	0.001375	0.00171875	0.00142187	0.0018125		0.00205469	0.00192969	0.00189844		0.00125391
VP3	1870	T	C	34	M>T													0.00139063	0.001375
VP3	1872	A	G	35	R>G	0.00175781	0.00426563	0.0019375	0.0031875	0.00161719	0.00252344	0.00342187	0.00435938	0.00265625	0.00374219	0.00322656	0.0040625	0.00678125	0.00539062	0.00307031	0.00360938	0.003875	0.00282812	0.0025625	0.0034375	0.00434375
VP3	1873	G	A	35	R>K															0.00100391
VP3	1874	G	C	35	R>S																				0.00229687
VP3	1875	A	G	36	I>V		0.00164844		0.00149219		0.00147656	0.00145313		0.00209375	0.00173438	0.00139844		0.00359375	0.00153906	0.001125		0.00140625	0.00142969	0.00175781	0.00140625	0.00134375
VP3	1876	T	C	36	I>T		0.00101172	0.00119531		0.00115234				0.0014375			0.00110938	0.00116406	0.00182812	0.00104688	0.00133594	0.00109375	0.00145313	0.00114062	0.00175	0.00106641
VP3	1877	A	G	36	I>M	0.00104688		0.0010625	0.00120312		0.00147656	0.00153906	0.00172656			0.00112109	0.00165625	0.00133594	0.00200781		0.0010625	0.00194531			0.00113281	0.00101562
VP3	1880	T	C	37	synonymous>P		0.00195312	0.00245313	0.0014375	0.00130469		0.00145313	0.00178906	0.00271875	0.002	0.00195312	0.00232031	0.00310156	0.002625	0.0019375	0.00282812	0.00176562	0.00267188	0.00235937	0.0014375	0.00175
VP3	1881	G	A	38	G>S																			0.00110938
VP3	1883	T	C	38	synonymous>G		0.00148437	0.0016875	0.00123438	0.00142969	0.00203125	0.00192188	0.00149219	0.00185938	0.00132813	0.0018125	0.00223438	0.00197656	0.00213281	0.00304687	0.0015	0.00179688	0.00183594	0.0021875	0.00336719	0.00236719
VP3	1883	T	G	38	synonymous>G												0.00103125	0.00146094
VP3	1885	A	G	39	E>G		0.00134375	0.00123047	0.0018125		0.0015625	0.00153906	0.0019375	0.00207813	0.00135937	0.00148437	0.00257813	0.0025625	0.00176562	0.00186719	0.00311719	0.00185938	0.0026875	0.00211719	0.00182812	0.00198438
VP3	1886	G	A	39	synonymous>E													0.00175	0.00103125	0.00203125
VP3	1888	T	C	40	V>A		0.00112109				0.0018125	0.00110938	0.00128906	0.00133594	0.00110938	0.00137109	0.00186719	0.00176562	0.0020625	0.00160938	0.00210938	0.00114062	0.00152344	0.00121875	0.00201172	0.00154687
VP3	1889	G	A	40	synonymous>V													0.00130469	0.00146875		0.00163281
VP3	1890	A	G	41	K>E		0.00124609	0.00121094	0.00129297	0.00114844		0.00104297	0.00108594	0.00160156	0.00211719		0.00114062		0.00285937	0.00150781	0.00115625	0.00113281	0.0016875	0.00164062	0.00159375	0.00108203
VP3	1891	A	G	41	K>R									0.00105469						0.00141406
VP3	1892	A	G	41	synonymous>K		0.0011875	0.00139063	0.00165625	0.00157031	0.00139063	0.002	0.00160938	0.00203906	0.0024375	0.00208203	0.00160938	0.00154687	0.00195312	0.00232813	0.00276563	0.00113281	0.0018125	0.00114062	0.00160938	0.00158594
VP3	1894	A	G	42	N>S		0.00143359			0.00124219		0.00183594				0.00116797		0.00185938	0.00255469	0.00213281	0.00136719	0.00159375	0.00120312		0.00228906	0.00140625
VP3	1896	T	C	43	synonymous>L		0.00146875		0.00134375					0.00190625	0.001625	0.00275	0.00515625	0.007625	0.00395312	0.00342969	0.00117188	0.00153125	0.00207031	0.001375	0.00122656
VP3	1897	T	C	43	L>S													0.00107812					0.00148437
VP3	1898	G	A	43	synonymous>L								0.00119531			0.00146875	0.004875	0.00536719	0.00207813	0.00110156			0.00242188	0.00135937	0.00113672
VP3	1899	A	G	44	M>V		0.00207422		0.00130469		0.00109375		0.00140625	0.00125781		0.00142969	0.0028125	0.00271875	0.00180469	0.00203125	0.00170312		0.00259375	0.00134375	0.00103125
VP3	1900	T	C	44	M>T		0.00129687	0.00121875						0.00114062	0.00132813		0.00242969	0.00202344	0.002375	0.00144531		0.00117969	0.00142187		0.00104297
VP3	1903	A	G	45	E>G										0.00104688			0.0014375		0.00159375	0.00122656		0.00157031	0.00151563
VP3	1904	A	G	45	synonymous>E								0.0014375			0.00103906	0.00103906	0.0015625	0.00160156	0.00241406	0.00107031		0.00146875
VP3	1905	A	G	46	I>V		0.00135937	0.00157031	0.00167578	0.00102734		0.00110156	0.00157813	0.00102344	0.0021875	0.00167578	0.00192188	0.00403125	0.0035	0.00295312	0.00267969	0.0015		0.00139844	0.00182812
VP3	1907	A	G	46	I>M		0.00129687	0.00123438	0.00134375	0.0013125	0.00116797	0.00104688	0.00142187			0.00110938	0.00184375	0.00303125	0.00144531		0.00126563	0.00148437	0.00185156	0.00202344	0.00110938
VP3	1910	T	C	47	synonymous>A	0.00117969	0.00186719	0.00132422	0.00154687	0.00145313	0.00141406	0.00180469	0.00276563	0.00209375	0.00154687	0.0024375	0.00296875	0.0041875	0.0034375	0.0018125	0.00249219	0.00189844	0.00184375	0.00265625	0.00158203	0.00204687
VP3	1912	A	G	48	E>G		0.00132422		0.00142969		0.0016875		0.00146875			0.00115625	0.00121875	0.0026875	0.00208594	0.002125	0.00125	0.00125781	0.0020625	0.00284375	0.00173438
VP3	1915	T	C	49	V>A														0.00123438				0.0015625			0.00111719
VP3	1916	T	A	49	synonymous>V				0.00230469	0.00155469	0.00174219	0.0021875	0.00271875	0.0016875	0.00160938	0.00164453	0.00198438	0.0025625	0.003375			0.001875	0.00298437	0.00366406	0.00384375	0.00573438
VP3	1916	T	C	49	synonymous>V		0.00116406	0.00222656		0.00129687		0.001375	0.00128906	0.00142969	0.00140625	0.00179688	0.00202344	0.00240625	0.00179688	0.00244531		0.00178906	0.00239062	0.00111719	0.00119922
VP3	1918	A	G	50	D>G		0.00214844	0.00210938	0.0026875	0.00192188	0.001375	0.00278125	0.0031875	0.00111719	0.0024375	0.00246094	0.00265625	0.00314063	0.002875	0.0026875	0.00210156	0.00253125	0.00171094	0.00159375	0.00138281	0.002375
VP3	1919	C	T	50	synonymous>D														0.00132813
VP3	1920	T	C	51	S>P		0.00156641	0.0016875	0.002125	0.00109766	0.00132813	0.00200781	0.00227344	0.00239062	0.00107812	0.0020625	0.00225781	0.00336719	0.00160938	0.00149219	0.00188281	0.001375	0.00171875	0.00280469	0.00274219	0.0016875
VP3	1922	A	G	51	synonymous>S				0.00151563	0.00146875		0.00201562		0.00184375	0.00153125	0.00133594	0.00125781	0.00315625	0.00167969	0.0011875	0.00158594		0.00216406	0.00260937	0.00225	0.00151563
VP3	1924	T	C	52	V>A		0.00125781	0.00179688	0.00104688	0.00116016		0.00126953		0.00110938		0.00132422	0.0013125	0.00122656	0.00110156	0.00102344	0.0021875	0.001375	0.00282812		0.00150781
VP3	1925	T	C	52	synonymous>V		0.00170312	0.00128125	0.0023125	0.00156641	0.0011875		0.00123438	0.00121875		0.00166406	0.001375	0.00327344	0.00227344	0.00196094	0.00107031	0.0016875	0.00135937	0.00167969	0.00125781	0.00121875
VP3	1926	G	A	53	V>I			0.00101562
VP3	1927	T	C	53	V>A	0.00140625	0.00132813	0.0015	0.00139844	0.00209375	0.00185938	0.00267188	0.00408594		0.00184375	0.00166406	0.00100781	0.00158594	0.00155469	0.00140625	0.00203125	0.00182031	0.00180469	0.00263281	0.001875	0.00192969
VP3	1928	C	T	53	synonymous>V									0.00121875					0.0010625
VP3	1930	C	T	54	P>L													0.00115625
VP3	1931	A	C	54	synonymous>P			0.00185938	0.00421875	0.00267188	0.00577344	0.00610938	0.00690625	0.00390625	0.00596875	0.00296094	0.00651562	0.00832812	0.00185938
VP3	1931	A	G	54	synonymous>P		0.00183594		0.00126563			0.00137891				0.00175781	0.00204687	0.00379688	0.00221875	0.0016875	0.00282812	0.00171875	0.00278125	0.00146094	0.00100781
VP3	1932	G	A	55	V>I			0.00118359	0.00144531				0.001125					0.00203906					0.00123438
VP3	1933	T	C	55	V>A		0.00139063	0.00139844	0.00172656	0.0014375		0.00136328	0.00136719	0.00165625	0.00185938	0.00115625	0.00235156	0.002	0.00135937	0.00152344	0.00246875	0.00178906	0.00217187	0.00176562	0.00185156	0.00144531
VP3	1934	C	T	55	synonymous>V									0.0013125				0.00102344
VP3	1936	A	G	56	Q>R																		0.00136719	0.00107031
VP3	1937	A	C	56	Q>H			0.00147656	0.00146875	0.00123438									0.00276563				0.00132813	0.00152344
VP3	1937	A	G	56	synonymous>Q												0.00128125	0.00244531
VP3	1937	A	T	56	Q>H			0.00148437	0.00104688											0.00380469
VP3	1938	A	G	57	N>D													0.00164062					0.00107031	0.00111719
VP3	1939	A	G	57	N>S													0.00107422			0.00101562		0.00103906
VP3	1940	T	C	57	synonymous>N													0.0013125	0.00111719	0.00108594			0.00110156	0.00121094	0.0011875	0.00109375
VP3	1941	G	A	58	V>I													0.00152344
VP3	1942	T	C	58	V>A												0.00100391	0.00157031	0.00160938		0.00134375		0.00186719		0.00127734	0.00105078
VP3	1943	T	A	58	synonymous>V																		0.00126563
VP3	1943	T	C	58	synonymous>V		0.00114453					0.00117188	0.00112891			0.00130469	0.00100391	0.002875	0.001125	0.00147656	0.0014375				0.00110938
VP3	1944	G	A	59	G>R																		0.001125
VP3	1945	G	A	59	G>E			0.00105469	0.00114844		0.00110938	0.00120312
VP3	1946	A	C	59	synonymous>G																			0.00106641	0.00321875
VP3	1946	A	G	59	synonymous>G		0.00292969	0.00114844	0.00266406	0.00179688	0.00202734	0.00229687	0.00207031	0.00170312	0.00328125	0.00259375	0.00396875	0.00396875	0.00309375	0.00360938	0.00267969	0.00192188	0.00216406	0.00267188	0.00246875	0.00217969
VP3	1947	G	A	60	E>K																		0.00153906	0.00464844	0.0125	0.0021875
VP3	1948	A	G	60	E>G		0.0016875				0.00119531	0.00119531		0.00189844		0.00114844	0.00114062	0.00165625	0.00103906	0.00185938	0.00339062	0.0010625	0.00221875	0.0026875	0.00240625	0.00115625
VP3	1949	G	A	60	synonymous>E							0.00102734	0.00249219		0.00249219	0.00157031	0.00278125	0.00167969	0.0015
VP3	1950	A	G	61	K>E		0.00203125		0.00108594			0.00172656	0.00164844	0.00117188			0.0014375	0.00279688	0.00171875	0.0020625	0.0010625		0.00225	0.0018125	0.00135937	0.00109375
VP3	1950	A	T	61	K>*																		0.00101562	0.00175	0.0066875
VP3	1951	A	G	61	K>R		0.0026875	0.00179688	0.00233594	0.00221875	0.00185938	0.00184375	0.00210938	0.00154687	0.00205469	0.00231641	0.00325	0.00428125	0.00348438	0.00301563	0.0025	0.00158594	0.00282031	0.00254688	0.00285937	0.00239844
VP3	1952	G	A	61	synonymous>K														0.00124219
VP3	1953	G	A	62	V>I														0.0010625	0.00310938	0.0170025	0.0235609	0.0282072	0.0236431	0.0183388	0.015625
VP3	1954	T	C	62	V>A	0.00149219	0.00123438	0.00178125	0.00164844	0.00153125	0.00151563	0.00132031	0.00147656	0.00110938	0.00135937	0.00167969	0.001125	0.00205469	0.0026875	0.00154687	0.00271875	0.00210938	0.00204687	0.00171875	0.0015	0.00238281
VP3	1956	A	C	63	N>H															0.001625		0.00114844	0.00102344	0.00139844	0.00190625	0.00228906
VP3	1956	A	G	63	N>D		0.00182031	0.00135156		0.00129687	0.00142187	0.00215625	0.002125	0.00147656	0.00151563	0.00173828	0.00166406	0.00275	0.00260156	0.00651562	0.0108964	0.0167969	0.0263569	0.0277961	0.0276316	0.0291941
VP3	1956	A	T	63	N>Y															0.00203906	0.00809375	0.0347862	0.113734	0.214474	0.289453	0.346546
VP3	1957	A	G	63	N>S		0.00125	0.00108594	0.00123828	0.00102734	0.00126563	0.00165625	0.00121094		0.00214062	0.00140625	0.0014375	0.00104688	0.002625	0.00440625	0.00578125	0.00704688	0.0102385	0.0112664	0.0127467	0.0147204
VP3	1958	C	T	63	synonymous>N																		0.001875
VP3	1959	T	C	64	S>P		0.00103516	0.00119531	0.00124609			0.00114062	0.00153125		0.00150781	0.00160156	0.00197656	0.00239844	0.00169531	0.00114844	0.001875		0.00292188	0.00274219	0.002125	0.00121094
VP3	1961	T	C	64	synonymous>S		0.0035	0.00347656	0.00167969	0.00208203	0.00178125	0.00253906	0.00246875	0.00190625	0.001875	0.00296094	0.00645312	0.0080625	0.00525	0.00245313	0.00195312	0.00260937	0.00329687	0.00246875	0.00217187	0.00177344
VP3	1962	A	G	65	M>V		0.00109375										0.00109375		0.00165625				0.00120312		0.00120703
VP3	1963	T	C	65	M>T		0.00178125	0.00121094	0.00104688						0.00105469	0.00116797	0.0018125	0.00253125	0.00201562				0.00165625		0.00117188
VP3	1966	A	G	66	E>G				0.0013125												0.00114844
VP3	1967	A	G	66	synonymous>E		0.00178125	0.00157031	0.0019375	0.00245313	0.0020625	0.00302344	0.00190625	0.00215625	0.00246875	0.00380469	0.00421875	0.0056875	0.0045625	0.00450781	0.00257813	0.00365625	0.00232813	0.00210938	0.00275781	0.00164062
VP3	1970	A	G	67	synonymous>A		0.00165625		0.00111719				0.00121094	0.00110938	0.00132031	0.00162891	0.00140625	0.002875	0.00189844	0.00175781		0.00159375	0.00138281	0.00107812
VP3	1971	T	C	68	Y>H		0.00160938			0.00114062			0.00217187		0.00116406	0.00108984		0.00221094	0.001875	0.00103906		0.0015625	0.00202344		0.00125
VP3	1972	A	G	68	Y>C				0.00176562		0.00114062	0.00119922		0.00120312	0.00129687	0.00104688	0.00185938	0.00154687	0.00179688	0.00136719	0.001875	0.00166406	0.00161719	0.00214062	0.00120312	0.001375
VP3	1973	C	T	68	synonymous>Y													0.00102344				0.00108984
VP3	1975	A	G	69	Q>R		0.00114844	0.00117188				0.00149609	0.00128125		0.00119531		0.00127344	0.00230469	0.00153906	0.00171875	0.00160156	0.001375	0.00135156	0.00171875	0.00160156	0.0010625
VP3	1976	G	C	69	Q>H		0.00219531	0.00298437	0.0030625
VP3	1977	A	G	70	I>V		0.00203125	0.00228906	0.00224219	0.001625	0.001125	0.003125	0.00238281	0.00236719	0.003	0.00278906	0.00282812	0.00273437	0.00275	0.00242188	0.00315625	0.00178125	0.00165625	0.00226562	0.00178906
VP3	1978	T	C	70	I>T		0.00116797		0.001125									0.00126563
VP3	1979	A	G	70	I>M							0.00109375	0.00102734			0.00101562	0.00110938	0.00217969	0.00185156	0.0013125	0.00132813		0.00175	0.00166406	0.00165234	0.00132813
VP3	1979	A	T	70	synonymous>I															0.00183594
VP3	1982	T	A	71	synonymous>P													0.00116797
VP3	1982	T	C	71	synonymous>P	0.00188281	0.00332812	0.00217187	0.002875	0.00203125	0.00235156	0.00296875	0.002625	0.003125	0.00263281	0.004875	0.00590625	0.00707813	0.00542188	0.0043125	0.003375	0.00465625	0.00446875	0.00514062	0.00427344	0.00490625
VP3	1984	T	C	72	V>A				0.00118359	0.00111719				0.0011875	0.0011875		0.00159375	0.00119922	0.00121875	0.00146875		0.00122656	0.00167188		0.00166016
VP3	1985	G	C	72	synonymous>V			0.00188281	0.00236719	0.00167969	0.00121875
VP3	1986	A	G	73	R>G		0.00178906	0.00227344	0.00182812	0.00145313	0.00144531	0.00165625	0.0016875	0.00279688	0.0018125	0.00188281	0.0035	0.00215625	0.002375	0.00276563	0.00245313	0.00326563	0.00250781	0.00171875	0.00232031	0.00220313
VP3	1988	A	G	73	synonymous>R		0.00149609	0.00284375	0.00638281	0.0065	0.00746875	0.00778125	0.0122944	0.00803125	0.008875	0.00707031	0.00890625	0.00757813	0.00778125	0.00235156	0.007	0.00832812	0.0166324	0.0304688	0.0342105	0.0401316
VP3	1989	T	C	74	S>P		0.0011875		0.00120312			0.00139844	0.00132813	0.002125	0.00154687	0.00118359	0.00164844	0.00169531	0.00151563	0.00160938	0.00188281	0.00105469	0.00179688	0.00128125	0.00189062	0.00153516
VP3	1989	T	G	74	S>A				0.00117188	0.00135156			0.00115625
VP3	1992	A	G	75	N>D		0.00153125	0.00127344	0.00155469			0.001375	0.00113281			0.00126563	0.00135156	0.00207031	0.00190625	0.001625		0.001625	0.00103906	0.00146094	0.00155469
VP3	1993	A	G	75	N>S		0.00145313	0.00403125	0.0055	0.002875	0.00390625	0.00335938	0.00328125	0.00311719	0.00311719	0.00239062	0.0044375	0.00333594	0.0031875	0.00189062	0.00245313		0.00120312	0.00105469	0.00117188
VP3	1994	C	T	75	synonymous>N		0.00117188						0.00142187	0.00117188	0.00121094	0.00122656	0.00245313	0.00338281	0.0031875	0.00183594			0.00133594
VP3	1995	G	A	76	E>K																		0.00178125	0.00351562	0.00623437
VP3	1995	G	C	76	E>Q		0.00161719	0.00341406	0.00404688	0.00177344	0.00113281
VP3	1996	A	C	76	E>A			0.00264062	0.00405469	0.00377344	0.00373437	0.00263281	0.002375
VP3	1996	A	G	76	E>G	0.00250781	0.0342516	0.175966	0.440707	0.543945	0.5941	0.62979	0.617393	0.617578	0.613076	0.645086	0.676059	0.702452	0.737562	0.435526	0.969526	0.969919	0.962772	0.955672	0.948779	0.947091
VP3	1996	A	T	76	E>V			0.00332812	0.007	0.0065625	0.005625	0.0050625	0.00334375	0.00135156	0.00182812	0.00144141	0.00104688	0.002125
VP3	1997	A	G	76	synonymous>E		0.0025625	0.0023125	0.00252344	0.00208594	0.00176953	0.00273437	0.00215625	0.00100781	0.00239062	0.00333594	0.00279688	0.00510937	0.00353125	0.0023125	0.00167188	0.00158594	0.00236719	0.00278906	0.00317187	0.00192969
VP3	2000	A	G	77	synonymous>G		0.00207813	0.00166406	0.00182031	0.00140625	0.00150781	0.00222656	0.00165625	0.00192188	0.00217187	0.00217578	0.0025	0.00279688	0.00334375	0.00238281	0.00260156	0.00228125	0.00191406	0.00225	0.00245313	0.001125
VP3	2001	T	C	78	S>P		0.00120312	0.0019375	0.00163281	0.00114062	0.00100391	0.00121094	0.00115625		0.00103125	0.00114062	0.00134375	0.00100781		0.00110938
VP3	2003	T	C	78	synonymous>S		0.001125		0.00141406		0.00127344	0.001625	0.00142187	0.00159375		0.00142187	0.001625	0.00134375	0.00204687	0.00136328	0.00246094		0.0023125	0.001875	0.00142969	0.00123828
VP3	2006	A	G	79	synonymous>G							0.00129687	0.00153125	0.001375	0.00175781	0.00160938	0.00161719	0.0014375	0.00142969	0.00190625	0.00139063		0.00145313	0.001625
VP3	2007	A	G	80	T>A		0.00203125	0.00164844	0.00164844	0.00205469	0.00227344	0.00217969	0.00194531	0.0035	0.00202344	0.00245313	0.00227344	0.00353125	0.00270312	0.00226562	0.00342187	0.00180469	0.00367187	0.00246094	0.00214844	0.00335938
VP3	2008	C	T	80	T>M													0.00126563
VP3	2009	G	A	80	synonymous>T							0.00105078						0.00132813						0.00110156
VP3	2011	A	G	81	Q>R																			0.00105469
VP3	2011	A	T	81	Q>L			0.001375	0.00263281	0.00166406	0.00223438	0.00120312
VP3	2012	A	G	81	synonymous>Q		0.00228125	0.00159375	0.00196094	0.00205469	0.00153125	0.00328125	0.0030625	0.00275	0.0018125	0.00190625	0.00154687	0.00289063	0.00248437	0.00210938	0.00196875	0.001875	0.002125	0.00164062	0.002375	0.00185156
VP3	2014	T	C	82	V>A		0.00100781	0.00101562	0.00127344	0.00125391	0.00136719	0.00135156		0.00100781	0.0010625
VP3	2015	A	G	82	synonymous>V		0.00125						0.00128906	0.00102344		0.00146094	0.00110156	0.00132813		0.00215625					0.00108594
VP3	2016	T	C	83	F>L														0.00164062	0.00101953	0.00175		0.00164844
VP3	2017	T	C	83	F>S										0.00101562				0.00115625
VP3	2018	C	T	83	synonymous>F		0.00121875	0.0010625	0.00114844					0.001125		0.00121875		0.00220313	0.0016875	0.00261719	0.0011875		0.0025			0.00141406
VP3	2021	C	T	84	synonymous>G												0.00139063	0.0015	0.00139844	0.00132031
VP3	2022	T	C	85	F>L		0.00154687	0.00196875	0.00228125	0.00208984	0.00125	0.00160938	0.00232031	0.00225	0.0011875	0.00229297	0.00338281	0.003875	0.00188281	0.00316406	0.00209375	0.00146875	0.00165625	0.00236719	0.00244531	0.00203906
VP3	2023	T	C	85	F>S		0.00109766	0.00125				0.00112891		0.00153125	0.00121875	0.00113281	0.00151563	0.00189844	0.00202344	0.00103125			0.001875	0.00182812		0.00160156
VP3	2024	T	C	85	synonymous>F		0.00121094	0.00135156	0.0016875	0.00146094	0.00119531	0.00144531	0.00151563		0.00175	0.00192969	0.00244531	0.00346875	0.0028125	0.00315625	0.0044375	0.00751563	0.0128289	0.0138569	0.0161493	0.0195518
VP3	2027	A	G	86	synonymous>P		0.00125391				0.00139063	0.00139844	0.00129687	0.00159375		0.00125781		0.00278125	0.00111719	0.0013125	0.00188281	0.00110156	0.00207813	0.00169531	0.00129687	0.00122266
VP3	2028	C	T	87	synonymous>L								0.00103125				0.00202344	0.00285937	0.0025	0.0016875
VP3	2029	T	C	87	L>P		0.00148437		0.00150781								0.00144531	0.00176562	0.00170312	0.00146094			0.00129687	0.0013125
VP3	2030	G	A	87	synonymous>L													0.00134375					0.00103125
VP3	2032	A	G	88	Q>R												0.00114062	0.0010625			0.0011875		0.00138281		0.00113672
VP3	2033	A	G	88	synonymous>Q	0.00107812	0.0015625	0.00129687	0.00199219	0.00176562	0.00179688	0.0016875	0.001875	0.00251562	0.00148437	0.00202344	0.00171875	0.00254688	0.00186719	0.003	0.00178125	0.00214062	0.00252344	0.00158594	0.00160938	0.0016875
VP3	2035	C	A	89	P>Q																				0.0013125
VP3	2036	A	G	89	synonymous>P		0.00159766					0.00117578	0.0013125		0.00114062	0.00135547	0.00191406	0.00144531	0.00222656	0.00105078	0.00159375	0.00171875	0.00145313		0.00157813
VP3	2039	G	T	90	synonymous>G					0.0013125	0.00175	0.00168359	0.00101562	0.00179688	0.00121875
VP3	2040	T	C	91	Y>H						0.00107812	0.00107812		0.0014375	0.001125				0.00121094				0.00122656		0.00115625
VP3	2041	A	G	91	Y>C			0.00106641		0.00132031						0.00109375	0.001375	0.001375	0.00139063	0.00125391			0.00114844		0.00125781	0.00105078
VP3	2042	C	T	91	synonymous>Y										0.00122656		0.001375	0.00179688	0.0013125		0.00167188	0.00514062	0.00778125	0.00978618	0.00759375	0.0114104
VP3	2043	T	C	92	S>P		0.00126563	0.00117969		0.00130469	0.00108594	0.00105859	0.00109375	0.00140625		0.00101172	0.00113281	0.00169531	0.00159375	0.00110547	0.00130469	0.00140625	0.00210938	0.00107031	0.00129687	0.00141406
VP3	2045	G	A	92	synonymous>S				0.00109375								0.00147656	0.001375	0.00179688
VP3	2045	G	C	92	synonymous>S																	0.00111719
VP3	2046	A	G	93	S>G		0.00124219			0.00126563		0.00178125	0.00125	0.0015		0.00125	0.00146875	0.00215625	0.00220313	0.00164844	0.00275	0.00145313	0.00159375	0.00117969
VP3	2048	T	C	93	synonymous>S			0.00129687				0.00116406	0.00149219	0.001125	0.00133594			0.00103906	0.00195312	0.001875	0.00109375	0.00101562		0.00103125
VP3	2050	T	C	94	V>A		0.00117969			0.00148047					0.0015625	0.00144141		0.00103906							0.0013125
VP3	2051	T	C	94	synonymous>V				0.00123438			0.00110938	0.00133594	0.00201562	0.00136719	0.00171875	0.00103125	0.00234375	0.00132031	0.00725		0.00103125	0.00100391			0.0010625
VP3	2053	T	C	95	F>S																0.00117188
VP3	2054	T	C	95	synonymous>F															0.00115625
VP3	2055	A	G	96	S>G		0.00153125	0.00246875	0.00192969	0.00135156										0.00157813
VP3	2056	G	A	96	S>N								0.00103125					0.00105078							0.00126563
VP3	2057	T	C	96	synonymous>S		0.00165625	0.00204687	0.00292188	0.00196875	0.0026875	0.00342187	0.00361719	0.00321875	0.00336719	0.00284375	0.00271094	0.00351562	0.00198438	0.0045625	0.0011875	0.00141406	0.00171875	0.00214844	0.00210938	0.00183594
VP3	2059	G	A	97	R>Q													0.00132031
VP3	2061	A	G	98	T>A							0.00116016		0.00189062		0.00132031	0.0013125	0.00103906	0.0013125		0.0025	0.00114062	0.00152344	0.00125781	0.0015
VP3	2063	G	A	98	synonymous>T										0.00142187			0.00121875		0.004625
VP3	2065	T	C	99	L>P	0.00125	0.00171875	0.00123438	0.00145313	0.00123438	0.00107812	0.00289063	0.00114062	0.00176562	0.00172656	0.00170312	0.00278125	0.00235937	0.00257813		0.00292188	0.00114844	0.00146094	0.00121875	0.00195312	0.00133594
VP3	2066	C	T	99	synonymous>L																			0.00100781	0.00100781
VP3	2067	C	T	100	synonymous>L												0.0014375	0.00160156	0.00141406						0.00100391
VP3	2068	T	C	100	L>P		0.00170703			0.00128125		0.00105469	0.00109766	0.00172656		0.00148437	0.0030625	0.00292969	0.00173438	0.00148047	0.00102344	0.00124219		0.00153906	0.00153125
VP3	2069	A	G	100	synonymous>L		0.00317187	0.00248437	0.00205469	0.00151563	0.00203125	0.00200781	0.00259375	0.00270312	0.00175	0.00301563	0.00292188	0.0056875	0.00297656	0.00134375	0.00171094	0.00167188	0.00235937	0.00196875	0.00179688	0.00129687
VP3	2072	A	G	101	synonymous>G		0.00271875	0.00213281	0.00229687	0.00190625	0.00138281	0.00254688	0.00178125	0.00221875	0.0018125	0.00282812	0.00332031	0.004	0.00332812	0.00620313	0.00385937	0.00170312	0.00122656	0.0031875	0.0026875	0.00278125
VP3	2072	A	T	101	synonymous>G									0.00138281
VP3	2074	A	G	102	E>G		0.00209375	0.00170312	0.00220313	0.00244531	0.00234375	0.00332812	0.00296875	0.00167969	0.00157031	0.00228906	0.00239844	0.00301563	0.0026875	0.00282812	0.00353125	0.00226562	0.00275	0.0035	0.00250781	0.00257813
VP3	2075	G	C	102	E>D																				0.00133594
VP3	2076	A	G	103	I>V		0.0019375	0.0024375	0.00254688	0.00178906	0.0025	0.00328125	0.00253125	0.0026875	0.00123438	0.00196875	0.00233594	0.00267188	0.00257031	0.0049375	0.002875	0.00125	0.00157813	0.00190625	0.00203125	0.00163281
VP3	2077	T	C	103	I>T		0.00138281						0.00178906		0.00124219		0.00113281	0.00203125	0.0015625	0.00164844	0.00105469		0.00176562	0.0015
VP3	2078	C	T	103	synonymous>I													0.00104688	0.00128125	0.00110938
VP3	2079	T	C	104	synonymous>L		0.00121875	0.0010625	0.00153906		0.00105469	0.00110938				0.00182422	0.00251562	0.00341406	0.00140625	0.00175	0.00129687		0.00137109	0.0026875	0.0028125	0.00165234
VP3	2082	A	G	105	N>D				0.00124219			0.00127734	0.0013125			0.00123828	0.0014375	0.00159375	0.00152344		0.00189062		0.001125	0.00183594	0.00140625
VP3	2083	A	G	105	N>S		0.00142187				0.00113281	0.0014375	0.00148437	0.00161719	0.00209375	0.00109375	0.00142187	0.00153906	0.00254688	0.00138281	0.00179688		0.00214062	0.00146875
VP3	2084	C	T	105	synonymous>N												0.00176562	0.0025				0.0018125	0.00182031		0.00113281
VP3	2085	T	C	106	Y>H		0.00109375		0.00102734							0.00108594	0.00128906	0.0025625	0.00127344				0.00127344	0.00171875
VP3	2086	A	G	106	Y>C													0.00173438					0.00117188
VP3	2087	T	C	106	synonymous>Y		0.00298437	0.00240625	0.0025625	0.00128125	0.00199219	0.00172656	0.00248437	0.00117188	0.00314063	0.00298437	0.00796875	0.00978618	0.0059375	0.00303125	0.00410938	0.00378906	0.00803125	0.00540625	0.00225	0.00221875
VP3	2088	T	C	107	Y>H													0.00176562	0.00101562				0.00140625	0.00122656
VP3	2089	A	G	107	Y>C									0.0010625			0.00103125	0.00132813	0.00173438		0.00122656		0.00121094	0.00128125
VP3	2090	T	C	107	synonymous>Y	0.00122656	0.00567969	0.00225781	0.00173438	0.00194531	0.00167188	0.00178906	0.0033125	0.00592188	0.00321094	0.00358594	0.00575	0.00949835	0.00517188	0.00340625	0.00242969	0.00403125	0.0063125	0.00440625	0.00364062	0.00375781
VP3	2091	A	G	108	T>A												0.00136719	0.00179688	0.00190625	0.00135156	0.00145313		0.00121875	0.00186719	0.00126172
VP3	2093	A	G	108	synonymous>T		0.00154687		0.00182812	0.00173438	0.00110547	0.00175391	0.00189062	0.00215625	0.00175781	0.00160938	0.00172656	0.0020625	0.00265625	0.00165625	0.00217187	0.00178906	0.0015625	0.00117969	0.00242969	0.00114062
VP3	2095	A	G	109	H>R		0.00104297							0.00153125	0.00182812	0.00123438	0.00240625	0.0039375	0.002125	0.00109766	0.001375		0.00185938	0.00104688	0.00104688
VP3	2096	T	C	109	synonymous>H		0.00317969	0.00241406	0.00396875	0.0019375	0.00242188	0.0029375	0.00132813	0.00129687	0.00244531	0.00376562	0.008625	0.00941612	0.00503125	0.00203125	0.0025625	0.00316406	0.0056875	0.0025	0.00265625	0.00125391
VP3	2097	T	C	110	W>R		0.00257813	0.00114062	0.00186719	0.00107031	0.001625	0.00139063	0.00119531		0.00101562	0.00182812	0.00303125	0.00379688	0.003375		0.00211719	0.00102344	0.00314844	0.00133594	0.00104688
VP3	2100	T	C	111	S>P	0.00108594	0.00126563	0.00114453	0.00164844	0.00184375		0.00111719	0.00167188	0.00128906	0.0016875	0.00103125	0.00117188	0.00109375	0.00199219	0.0010625	0.00109375	0.00128906	0.00196875	0.00104688	0.00140625	0.00128125
VP3	2102	A	G	111	synonymous>S	0.00121484	0.00253125		0.0020625	0.00199219	0.00147266	0.00165625	0.00225	0.00135156	0.00317187	0.00292188	0.00207031	0.00335156	0.00276563	0.002625	0.0025625	0.00150781	0.00238281	0.00276563	0.00278125	0.00207031
VP3	2103	G	C	112	G>R																				0.00203125
VP3	2105	C	T	112	synonymous>G								0.00146875		0.00138281			0.00120312	0.00178125
VP3	2106	A	G	113	S>G		0.002	0.00180469	0.00239062	0.00133984	0.00125781	0.00171875		0.00225	0.00160938	0.00232031	0.00113672	0.002875	0.0026875	0.00149219	0.00296875	0.00188281	0.00174219	0.00101562	0.00207813	0.00179688
VP3	2109	A	G	114	I>V		0.00116797		0.0014375	0.00128125				0.00152344	0.00192969	0.00125781	0.00114844	0.00309375	0.00103906		0.00123438	0.00198438	0.00114844		0.00136719
VP3	2110	T	C	114	I>T															0.00104688
VP3	2111	A	G	114	I>M																		0.00103125
VP3	2112	A	G	115	K>E									0.00132813			0.00164844	0.00164062					0.00101562
VP3	2113	A	G	115	K>R		0.002875		0.00125			0.00133594	0.00108594	0.00171094	0.00129687	0.00146094	0.00225781	0.0026875	0.00226562	0.002	0.00222656	0.00117188	0.00242969	0.00146875	0.00189844	0.00171875
VP3	2116	T	C	116	L>P		0.00285156	0.00303125	0.00225	0.00177344	0.00152344	0.001875	0.00290625	0.00115625	0.00158594	0.00262109	0.00560937	0.00629687	0.004125	0.00132031		0.00257813	0.0034375	0.00172656	0.00164844	0.00140625
VP3	2117	T	C	116	synonymous>L		0.00185938	0.00104688	0.00178125	0.00117578	0.00114062	0.001375	0.00120312	0.00175	0.00169531	0.00266406	0.00425	0.00725	0.0031875	0.00266406	0.0029375	0.00389062	0.00933388	0.00854687	0.0133018	0.0113692
VP3	2118	A	C	117	T>P																				0.00126563
VP3	2118	A	G	117	T>A									0.00111719		0.00121875	0.001125		0.00170312						0.00139453
VP3	2119	C	T	117	T>M												0.00110156						0.00100391
VP3	2120	G	A	117	synonymous>T												0.001625	0.00126563		0.00157031
VP3	2120	G	C	117	synonymous>T													0.00107031
VP3	2121	T	C	118	F>L												0.00135937	0.00190625				0.00117188	0.00172656	0.00132813
VP3	2122	T	C	118	F>S		0.00172656	0.00133594	0.001125	0.00152344		0.00119922	0.0014375			0.00154687		0.00265625	0.001375		0.00134375	0.001375	0.00125	0.00165625	0.00165234	0.00127344
VP3	2123	T	C	118	synonymous>F		0.00123438			0.00135156		0.00153906	0.001125	0.00180469	0.00134375	0.00258594	0.00495313	0.00611719	0.00578125	0.00676562	0.00365625	0.007125	0.0163035	0.0199013	0.0272821	0.0280839
VP3	2125	T	C	119	M>T		0.00130469	0.0015	0.00120312	0.00111719	0.00107812	0.00117188		0.0018125		0.00125	0.00202344	0.00196875	0.0020625	0.00142969	0.00151563	0.00125	0.00235937		0.0019375
VP3	2127	T	C	120	F>L		0.00119922	0.00144531	0.0010625			0.00109375		0.00152344	0.00178125	0.00154687	0.00127344	0.00196875	0.00175	0.00135156	0.0020625	0.00116406	0.00197656	0.00163281	0.001625	0.00148437
VP3	2128	T	A	120	F>Y																				0.00116406
VP3	2128	T	C	120	F>S					0.00105078				0.00178125			0.00148437		0.00121875		0.00103906		0.00105469	0.00179688	0.00100391
VP3	2129	C	T	120	synonymous>F										0.00121875	0.00125	0.00119531	0.00150781	0.00139063	0.0011875	0.00121875	0.00104688
VP3	2130	T	C	121	C>R		0.00246094	0.00104688	0.00135156		0.00154687	0.00189844	0.00110938	0.00145313	0.00148437	0.00182031	0.0021875	0.00414062	0.00252344	0.00110938	0.00165625	0.00105469	0.00195312	0.00245313	0.00138672	0.00254688
VP3	2131	G	A	121	C>Y																		0.00103516
VP3	2132	T	C	121	synonymous>C		0.00125	0.00100781	0.00179688	0.00163672	0.00173438	0.00278906	0.00314063	0.00359375	0.00316406	0.00341016	0.00354687	0.0039375	0.00457813		0.00120312		0.00189062	0.00123438	0.00134375	0.00119922
VP3	2135	T	C	122	synonymous>G		0.00179688	0.00265625	0.0021875	0.0025	0.00288281	0.00279688	0.00342187	0.00365625	0.003375	0.0024375	0.003125	0.00282031	0.004	0.00185938	0.00270312	0.0025625	0.00171875	0.00246094	0.00142578	0.00164062
VP3	2136	T	C	123	S>P								0.0010625		0.00103125				0.00164062	0.00127734			0.00142187	0.00189062	0.00170312
VP3	2138	G	A	123	synonymous>S				0.00120312									0.00138281	0.00196875	0.00133594	0.0162623	0.0133635	0.0135074	0.0117804	0.0085625	0.00715625
VP3	2141	C	T	124	synonymous>A												0.00128125	0.00114844	0.00101562
VP3	2142	A	G	125	M>V		0.0015		0.00175	0.00144141	0.00132813	0.00199219	0.00140625	0.00210938	0.00190625	0.00144922	0.00198438	0.00371094	0.00332031	0.00113281	0.0013125	0.0016875	0.00113281	0.00207031	0.00123438	0.00125781
VP3	2143	T	C	125	M>T				0.00220313			0.00128516				0.00110938	0.00167188	0.00276563	0.00129687	0.00135937	0.001875	0.00119531	0.00130469		0.00152344
VP3	2145	G	A	126	A>T													0.0014375
VP3	2146	C	T	126	A>V			0.00114062	0.00103125									0.00139063
VP3	2147	T	C	126	synonymous>A	0.00104688	0.0045625	0.00490625	0.00435156	0.00119531	0.00245313	0.00176562	0.002125	0.00227344	0.00271875	0.00376562	0.00759375	0.0104441	0.004	0.00250781	0.00235156	0.00521875	0.00603125	0.004375	0.00330469	0.00279688
VP3	2148	A	G	127	T>A		0.00136719		0.00144531			0.00154687			0.00110938	0.00123438	0.00153125	0.00365625	0.00224219	0.00103906	0.00113281	0.0014375	0.0018125	0.00160156	0.00141016	0.00142969
VP3	2149	C	T	127	T>I		0.00132031										0.0010625	0.0021875					0.00163281	0.00103125
VP3	2150	T	C	127	synonymous>T		0.00275781	0.00184375	0.00282812	0.00123438	0.00187109	0.00141406	0.00190625	0.00157031	0.001625	0.00326563	0.00495313	0.00623437	0.00390625	0.00241406	0.00194531	0.00160938	0.0035	0.00176562	0.00220313	0.00192188
VP3	2151	G	A	128	G>R														0.00128125
VP3	2153	A	G	128	synonymous>G																0.00201562
VP3	2157	T	C	130	F>L		0.00132031	0.00154687	0.00142969	0.00127344					0.0010625	0.00134766
VP3	2159	C	T	130	synonymous>F														0.0015		0.00104688	0.00113281			0.00104297
VP3	2161	T	C	131	L>P		0.00291406	0.00266406	0.002625	0.0010625		0.00153516	0.00130469		0.00109375	0.00132031	0.00432031	0.00575	0.00415625	0.00114062	0.001625	0.00141406	0.00395312	0.00124609	0.00127344	0.001625
VP3	2162	T	A	131	synonymous>L																				0.00107031
VP3	2162	T	C	131	synonymous>L		0.00315625	0.00371875	0.00282031	0.00132813	0.00188281	0.00196875	0.00114062	0.00104688	0.00160938	0.00410938	0.00584375	0.00870312	0.00634375	0.00116406	0.00171875	0.00157813	0.00403125	0.00246094	0.00149219	0.00173438
VP3	2163	T	A	132	L>M													0.00104688
VP3	2163	T	C	132	synonymous>L		0.00196875	0.001875	0.00157031			0.00123438	0.0018125	0.00117969	0.00105469	0.00182422	0.00289844	0.00278125	0.00223438			0.00396875	0.004875	0.00304687	0.00179688	0.00171875
VP3	2164	T	C	132	L>S		0.00108594											0.00185156	0.00120312		0.00114062
VP3	2168	A	G	133	synonymous>A		0.00240625	0.00107031	0.00152344	0.00102344	0.00164062	0.00208594	0.0010625	0.00107031	0.00276563	0.00210938	0.00203125	0.00378125	0.003875	0.00396875	0.00176562	0.00265625	0.00244531	0.00182812	0.00182031	0.00164062
VP3	2169	T	C	134	Y>H										0.00117188				0.00121875				0.00101562
VP3	2170	A	G	134	Y>C										0.00128906				0.00142969
VP3	2171	C	T	134	synonymous>Y														0.00125781
VP3	2172	T	C	135	S>P		0.0015625	0.0019375	0.00203125	0.00154687	0.00171094	0.00132813		0.00159375	0.00107031	0.00179688	0.00132813	0.00209375	0.00160156	0.00153125	0.0019375	0.00257813	0.0019375	0.00164844	0.00175	0.00140625
VP3	2174	A	G	135	synonymous>S		0.00101562				0.00133594	0.00142187	0.00127344	0.00121094	0.00117188	0.00101172	0.00132813	0.0011875	0.00146094	0.00180469			0.00134375	0.001875	0.0011875	0.00154687
VP3	2176	C	T	136	P>L														0.00128906
VP3	2177	A	G	136	synonymous>P		0.00176562	0.00145313		0.00179688	0.00138281	0.00197656	0.002125	0.003	0.00221094	0.00207813	0.00180469	0.00321875	0.00113281	0.0018125	0.002125	0.00129687	0.0011875	0.00172656	0.00251562	0.00178906
VP3	2180	A	G	137	synonymous>P		0.00107812		0.00139844	0.00134375	0.00117188	0.00190625	0.0010625	0.0020625	0.00211719	0.00201953	0.0021875	0.0029375	0.00171875	0.00151563	0.0015625	0.00116406	0.00333594	0.00175	0.00201562	0.00153125
VP3	2183	T	C	138	synonymous>G	0.00109375	0.001125		0.00109375		0.00125781	0.0015625	0.00213281	0.002125	0.00225	0.00145313	0.00196094	0.00257813	0.00153125	0.00166406	0.001125		0.00127344	0.00121875		0.00128125
VP3	2185	C	T	139	A>V								0.00101562	0.00111719							0.00129687
VP3	2186	T	C	139	synonymous>A	0.00161719	0.00186719	0.00188281	0.00163281	0.00146875	0.00132813	0.00146875	0.00145313	0.002625	0.00125781	0.00175781	0.00219531	0.00215625	0.00382031	0.00209375	0.00220313	0.0023125	0.00169531	0.00204687	0.00130469	0.00188281
VP3	2189	A	G	140	synonymous>G		0.00197656	0.00153125	0.00194531	0.00253125	0.00301563	0.003125	0.002375	0.00284375	0.0035	0.00226562	0.00335938	0.00264062	0.00221875	0.00317187	0.00203125	0.00210938	0.00264844	0.00273437	0.00278125	0.00222656
VP3	2191	C	T	141	A>V		0.00111719	0.00467969	0.00475781	0.0021875	0.0016875	0.00152344	0.00165625	0.00189062				0.00125
VP3	2192	T	C	141	synonymous>A	0.00132813	0.00192969	0.00198438	0.00171094	0.002	0.00175	0.00210938	0.0023125	0.002375	0.0013125	0.00235156	0.00282812	0.00389062	0.0033125	0.00407813	0.00257813	0.00105078	0.001625	0.00303906	0.00255469	0.0015
VP3	2195	T	C	142	synonymous>P		0.0035	0.00164844	0.00171094	0.00142187	0.00133594	0.002	0.00209375	0.0016875	0.0021875	0.00330469	0.00360938	0.00514844	0.00274219	0.003375	0.00276563	0.00310938	0.00371875	0.00272656	0.00221094	0.00117188
VP3	2196	A	G	143	T>A							0.00113281	0.00121094	0.00215625	0.00173438	0.00105469	0.0011875	0.002125	0.00108594	0.00139063	0.00120312	0.00121094	0.00111719
VP3	2197	C	A	143	T>K	0.00223438	0.00570313	0.00375	0.00296875	0.00170312	0.00152344	0.00109375	0.00260937	0.00207031	0.00117969	0.00164062	0.00300781	0.0026875	0.00276563	0.00146875		0.00123438		0.00203125	0.0015
VP3	2197	C	T	143	T>I													0.00104688
VP3	2198	A	G	143	synonymous>T																		0.0010625
VP3	2200	A	G	144	K>R								0.00107031	0.00192188	0.00125	0.00199219	0.0033125	0.00467187	0.00475
VP3	2201	A	G	144	synonymous>K		0.001125					0.00100781	0.00128125	0.00124219		0.00132422	0.001625	0.00210938		0.00167969			0.00153906
VP3	2202	A	G	145	R>G		0.00175	0.001125						0.00103125	0.00122656	0.00138281		0.002			0.00125781	0.00106641	0.00153125		0.00115625
VP3	2204	G	A	145	synonymous>R															0.00220313
VP3	2206	T	C	146	V>A													0.00128906	0.00119531			0.00185938	0.00117969		0.00107031
VP3	2207	T	C	146	synonymous>V			0.00140625	0.00126563	0.00140625	0.001375	0.00165625	0.00134375	0.00139844	0.00126563	0.00141016	0.00339844	0.00345313	0.00164062	0.00167188	0.00182031		0.00190625	0.0011875	0.00170312	0.00109375
VP3	2208	G	A	147	D>N													0.00110156
VP3	2209	A	G	147	D>G		0.00101562		0.00139063			0.00167188	0.00167969	0.00128125	0.00228125	0.00151172		0.003375		0.0015625	0.0025	0.00164062	0.00245313	0.00190625	0.00190625	0.0013125
VP3	2210	T	C	147	synonymous>D	0.00115234	0.0014375	0.00121094	0.00142187	0.00133594		0.00124219	0.00109375	0.00142969	0.00235156	0.00163281	0.00258594	0.0033125	0.00239844	0.00292969	0.00665625	0.0069375	0.0063125	0.00451563	0.0040625	0.00313281
VP3	2213	T	C	148	synonymous>A	0.00117969	0.00275781	0.00254688	0.00274219	0.00134375	0.00120312	0.00189062	0.00204687	0.0014375	0.00225781	0.00329297	0.004375	0.0068125	0.00359375	0.00385937	0.00239844	0.00167969	0.00209375	0.0025	0.00160938	0.002
VP3	2214	A	G	149	M>V												0.001625	0.00149219	0.00141406	0.00111719			0.00139844	0.00121875
VP3	2215	T	C	149	M>T		0.00128906					0.001375					0.00185938	0.003375					0.001625	0.00154687
VP3	2218	T	C	150	L>P		0.00207031					0.00102734		0.00120312	0.00104688	0.00142187	0.00142969	0.00427344	0.00107031						0.00149219
VP3	2219	T	A	150	synonymous>L													0.00121875							0.00100391
VP3	2219	T	C	150	synonymous>L	0.0011875		0.00138281	0.00185156		0.00176562		0.00198438	0.00192188	0.00321875	0.00335938	0.00692187	0.0115132	0.0079375	0.00253125	0.00170312	0.001625	0.00264844		0.00164062	0.0015
VP3	2220	G	A	151	G>S														0.00103125
VP3	2222	T	C	151	synonymous>G	0.00210156	0.00190625	0.00197656	0.00310156	0.00201562	0.00339062	0.003625	0.00367187	0.0050625	0.00440625	0.00504688	0.00532812	0.0070625	0.00589063	0.006375	0.00464062	0.003875	0.00424219	0.00375781	0.00459375	0.00422656
VP3	2223	A	G	152	T>A							0.00135937						0.00138281	0.00142969	0.00155469				0.00160938	0.00166797
VP3	2225	T	C	152	synonymous>T		0.00209375	0.00207031	0.00195312	0.00159375	0.00182812	0.00286719	0.00195312	0.00125781	0.00166406	0.0023125	0.00279688	0.00553125	0.0041875	0.00407813	0.00367187	0.00189062	0.00334375	0.00236719	0.0018125	0.0015
VP3	2227	A	G	153	H>R		0.00149219								0.00117188		0.0015	0.00164844	0.00220313	0.00103906	0.00125781		0.00149219
VP3	2228	T	C	153	synonymous>H		0.00254688	0.00175	0.00117969		0.00143359	0.00139844		0.00142187	0.00217187	0.0023125	0.00304687	0.00553125	0.00329687	0.00316406	0.00221875	0.00119141	0.0023125	0.00229687	0.00167969	0.0016875
VP3	2229	G	A	154	V>I													0.0014375					0.00132031
VP3	2230	T	C	154	V>A																		0.001125			0.00114844
VP3	2231	A	G	154	synonymous>V		0.00110938					0.00101172	0.0013125	0.00123438		0.00173438	0.00134375	0.0035	0.0025	0.00292188	0.00178906	0.00114062	0.00145313	0.00133594
VP3	2231	A	T	154	synonymous>V															0.00119531
VP3	2232	A	C	155	I>L									0.00127344
VP3	2232	A	G	155	I>V			0.00161719	0.00142187			0.00121875			0.00121875				0.00148437	0.001375				0.00109375
VP3	2233	T	C	155	I>T																			0.00107812
VP3	2234	T	C	155	synonymous>I		0.00100391			0.00136719	0.00117578	0.00176562	0.0015625	0.00420312	0.0031875	0.00215625	0.00253125	0.004875	0.00125	0.00129687		0.00101953
VP3	2235	T	C	156	W>R												0.00120312	0.00132813
VP3	2239	A	G	157	D>G		0.001875	0.00158594	0.00222656	0.002	0.00148437	0.00214062	0.0014375	0.00246875	0.00161719	0.00221875	0.00146875	0.0026875	0.00229687	0.0026875	0.00215625	0.00221094	0.00216406	0.0021875	0.00246094	0.00179688
VP3	2240	C	T	157	synonymous>D										0.00140625	0.00133984	0.00110156	0.00217969	0.00239062	0.00195312		0.001375	0.00152344	0.0010625
VP3	2241	G	A	158	V>M												0.00114844	0.00134375
VP3	2242	T	C	158	V>A				0.00101562	0.00113281		0.00155078						0.001375	0.00114844	0.00114062	0.00130469		0.00120312	0.00139063	0.00116406
VP3	2243	G	A	158	synonymous>V													0.00121094
VP3	2246	G	A	159	synonymous>G									0.00130469			0.00104688	0.00135156					0.00158594			0.00105469
VP3	2247	C	T	160	synonymous>L								0.00126563		0.00122656			0.00107031	0.00115625	0.00102734
VP3	2248	T	C	160	L>P		0.00156641		0.0010625		0.00103125		0.00104688	0.0015625		0.00161719	0.00128125	0.00135937	0.00134375		0.00142187		0.0011875		0.00103906
VP3	2249	A	G	160	synonymous>L	0.00109766	0.00122656	0.00150781	0.00113281	0.00228125	0.0015	0.00165625	0.00164062	0.001875	0.00160156	0.00157813	0.00182031	0.00275	0.00219531	0.004875	0.003125	0.00322656	0.00239062	0.00184375	0.00200781	0.0018125
VP3	2251	A	G	161	Q>R													0.0013125		0.00117969	0.00100781	0.00141406	0.00167188		0.00103125
VP3	2252	A	G	161	synonymous>Q							0.00114062	0.00159375	0.00126563	0.0015	0.00122656	0.00136719	0.00175	0.00139063	0.00169531		0.00113672	0.00147656	0.00120312		0.00111719
VP3	2253	T	C	162	S>P				0.00104688										0.00140625			0.00103125	0.00108594			0.00117969
VP3	2255	A	G	162	synonymous>S													0.00145313	0.00123438	0.00165625
VP3	2255	A	T	162	synonymous>S									0.00107812
VP3	2256	A	G	163	S>G		0.00164062			0.00103516		0.0011875			0.00115625	0.00101172		0.00115625	0.0011875		0.0023125	0.00112109	0.00195312	0.00164062	0.00130469
VP3	2258	T	C	163	synonymous>S		0.00126563	0.00121094	0.00198438		0.00161719	0.00141406	0.00128125	0.0011875		0.00173438	0.00154687	0.00213281	0.00234375	0.00348438	0.00178125	0.00107812	0.00251562	0.00178906	0.00148437
VP3	2261	C	T	164	synonymous>C							0.00151563	0.00132031	0.00111719		0.00199219	0.00159375	0.00236719	0.00221875	0.00233594	0.00425	0.0065625	0.008625	0.0108553	0.0129215	0.0121711
VP3	2263	T	C	165	V>A		0.00105469	0.00124219				0.00139063	0.00140625	0.00103125	0.00128125			0.00197656	0.0015625	0.00132422		0.00167969	0.002	0.00119531	0.00142187	0.00109375
VP3	2265	C	T	166	synonymous>L											0.00102344							0.00102734
VP3	2266	T	C	166	L>P		0.00292188		0.00122266	0.00158594	0.00132031	0.00137891		0.00117188		0.00135937	0.00239844	0.00264062	0.00210156	0.00133594	0.00240625	0.0023125	0.00114062	0.00199219	0.00182812	0.00155469
VP3	2267	G	A	166	synonymous>L												0.00204687	0.00228906					0.00296875	0.00323438	0.00439062	0.00128906
VP3	2268	T	C	167	C>R		0.00146875	0.00136719										0.00117188	0.00133594			0.0018125	0.00172656	0.00175781	0.00117969	0.0010625
VP3	2270	T	C	167	synonymous>C	0.00135937	0.00175	0.00185156	0.00191406	0.0015625	0.00196875	0.00125	0.00286719	0.00257031	0.00334375	0.00367187	0.005125	0.00540625	0.0043125	0.0104646	0.0031875	0.00213281	0.00323438	0.00364062	0.00270312	0.00409375
VP3	2271	A	G	168	I>V		0.00138281			0.00132813	0.00217187	0.00133984	0.00227344	0.00228125	0.00270312	0.00291406	0.00234375	0.00424219	0.00434375	0.00383594	0.00253125	0.00235156	0.00434375	0.00596094	0.007	0.00823438
VP3	2272	T	C	168	I>T		0.00130078	0.00121094	0.001375			0.00116016		0.00136719	0.00146875			0.00180469	0.001625	0.00101562	0.00108594	0.001125	0.00107031	0.00117188
VP3	2273	A	G	168	I>M							0.0015625		0.00135937			0.001375	0.0019375	0.00121875	0.00110938	0.00189062	0.00129687	0.00157813
VP3	2276	C	T	169	synonymous>P		0.00139063		0.0011875		0.00116406	0.00116406			0.00140625	0.00128516	0.00186719	0.00460937	0.00147656			0.00117578	0.00126563
VP3	2277	T	C	170	W>R		0.00202344	0.00132031	0.00127344	0.00107812	0.00145313	0.00110938	0.00125		0.0013125	0.00145313	0.002125	0.005125	0.00296875	0.00152344		0.00142969	0.002375	0.0014375	0.00210938	0.00138281
VP3	2278	G	A	170	W>*													0.00109375
VP3	2279	G	T	170	W>C																		0.00123438		0.00113281
VP3	2280	A	G	171	I>V															0.00125			0.00153125	0.0011875	0.00376562
VP3	2281	T	C	171	I>T													0.00105078			0.00105859			0.00101562
VP3	2282	A	G	171	I>M													0.00121875	0.00104688
VP3	2282	A	T	171	synonymous>I																				0.00253906
VP3	2283	A	G	172	S>G		0.0025625	0.00135937	0.00221094	0.00170703	0.00110938	0.00221875	0.00213281	0.00117188	0.00160938	0.00189062	0.00167188	0.00467187	0.00283594	0.00233594	0.0020625	0.001375	0.00132031	0.00176562	0.00126563	0.00124219
VP3	2285	C	T	172	synonymous>S																					0.00123828
VP3	2287	A	G	173	Q>R		0.00104688					0.00109766			0.00104688		0.00105469	0.0013125	0.0015	0.00119922		0.00149219	0.00179688		0.00134375	0.00110156
VP3	2288	A	G	173	synonymous>Q				0.00103125					0.00114844		0.00116016	0.00121484	0.00177344	0.00138281	0.00164844	0.00138281		0.00185938			0.00103906
VP3	2289	A	G	174	T>A		0.00146875	0.00130469	0.00217969		0.00159375	0.00189062	0.00185938	0.00290625	0.00265625	0.00166406	0.00147656	0.00207031	0.00196875	0.00244531	0.00315625	0.00165625	0.00196094	0.00226562	0.00171484	0.00217969
VP3	2291	A	G	174	synonymous>T		0.00178906	0.00117969		0.0013125	0.00110938	0.00155469	0.00163281	0.00121875		0.00125781	0.00121875	0.00179688	0.00196094	0.00217187	0.00186719	0.00155469	0.00190625		0.00155469	0.00139063
VP3	2293	A	G	175	H>R		0.00141016		0.00132031	0.00127734		0.00169531	0.00144531	0.00158594	0.00140625	0.00153906	0.00164062	0.0023125	0.00167969	0.00107031	0.00226562	0.0018125	0.00134375	0.00239062	0.00176562	0.00188672
VP3	2294	C	T	175	synonymous>H															0.00102344				0.0011875
VP3	2295	T	C	176	Y>H		0.00117578					0.00102734			0.00128125	0.00115234	0.00127734	0.00274219	0.00175781				0.00157813	0.00146875
VP3	2296	A	G	176	Y>C		0.00116016					0.00117188	0.0011875				0.00145313	0.00115625	0.00138281		0.0011875		0.00189844	0.0016875	0.00101172
VP3	2298	C	T	177	R>W													0.00125			0.00126563
VP3	2299	G	C	177	R>P																				0.00121484
VP3	2300	G	A	177	synonymous>R																		0.00147656	0.00234375	0.00352344	0.0018125
VP3	2301	T	C	178	F>L	0.00178906		0.00126563	0.00159375		0.00160547	0.00185156	0.0020625	0.00150781	0.00129687	0.00132422	0.001625	0.002	0.00192969		0.00155469	0.0019375		0.0013125	0.00150781
VP3	2303	T	A	178	F>L																				0.00225781
VP3	2303	T	C	178	synonymous>F		0.00142969	0.00140625			0.00104688	0.00210156	0.00125	0.00125	0.00101562	0.00140625	0.00104688	0.00132813	0.00140625	0.00245313	0.002125	0.00111719	0.00107812		0.00110938	0.00105859
VP3	2305	T	C	179	V>A		0.00110156	0.00106641	0.00114062	0.00104688		0.00165234	0.00111719	0.00232813		0.00121875		0.0015	0.00132813	0.00150781	0.0013125	0.00123438	0.00149219	0.00205469	0.00157813
VP3	2306	T	A	179	synonymous>V																				0.00115234
VP3	2306	T	C	179	synonymous>V				0.00155469	0.00114062		0.0010625	0.00115625		0.00144531		0.00155469	0.00185938	0.00182812		0.00135937
VP3	2307	G	A	180	A>T															0.00121875			0.00126563
VP3	2309	T	C	180	synonymous>A		0.00217187	0.00198438	0.00282812	0.00129687	0.0020625	0.00250781	0.00301563	0.00225	0.00315625	0.00342187	0.00453906	0.00739062	0.0061875	0.00376562	0.00117188	0.001875	0.0041875	0.00282812	0.00319531	0.0023125
VP3	2310	T	A	181	S>T																0.00342187	0.00351562	0.00271875	0.00225	0.00147266	0.0015625
VP3	2310	T	C	181	S>P							0.00150391	0.00146875	0.00138281		0.0011875	0.00245313	0.00105469	0.00136719	0.00111719		0.00125	0.00170312
VP3	2311	C	T	181	S>L																				0.0011875
VP3	2312	A	G	181	synonymous>S		0.0011875	0.00116406	0.00132813					0.0010625	0.00109375	0.00116797	0.00120312	0.00125	0.00114844	0.00183594	0.00158594		0.00271875	0.00185938	0.001125
VP3	2312	A	T	181	synonymous>S																				0.00116406
VP3	2314	A	C	182	D>A																				0.00132813
VP3	2314	A	G	182	D>G				0.00119531	0.00112109		0.00121484		0.0016875	0.00145313	0.00123047	0.00176562	0.00246094	0.00171094	0.00165625	0.0016875	0.00121484	0.00180469	0.00139844	0.00230469
VP3	2315	T	C	182	synonymous>D		0.00109766		0.00100781				0.00171094			0.00158203	0.00225	0.00446875	0.00248437	0.00336719		0.00129687	0.00101562		0.00137891
VP3	2317	A	G	183	E>G		0.00251562	0.00219531	0.00299219	0.00155078	0.00139844	0.00210938	0.00164844	0.00267188	0.00192969	0.00240234	0.0026875	0.00307812	0.00257813	0.0021875	0.00332812	0.00215625	0.00273437	0.00241406	0.00221094	0.00175
VP3	2318	G	A	183	synonymous>E				0.00105078		0.00109375				0.001375	0.00132422	0.00128125	0.00298437	0.0025625
VP3	2319	T	C	184	Y>H		0.00100781		0.00126563	0.00167188		0.00127344		0.00122656			0.0015	0.00141406		0.00107031			0.00124609		0.00149609
VP3	2320	A	G	184	Y>C		0.0015625	0.00109375	0.00128906			0.00129687		0.00254688	0.00119531	0.00103125	0.001625	0.00214062	0.0018125	0.00179688			0.00138281	0.00142187		0.00159375
VP3	2321	T	C	184	synonymous>Y		0.0029375	0.00870312	0.0191612	0.0164885	0.0201891	0.0187706	0.01875	0.0153783	0.0131579	0.0110095	0.008875	0.0114309	0.0100329	0.00760937	0.00140625	0.00159375	0.00164844	0.0019375	0.00179688	0.00116016
VP3	2322	A	G	185	T>A					0.00133984					0.0015		0.00140625	0.00154687	0.00135156	0.00115625	0.00201562			0.00107812
VP3	2324	C	T	185	synonymous>T		0.00117188						0.00147656	0.00111719		0.00171875	0.00190625	0.00292188	0.00170312			0.00128125	0.00123438	0.00125781	0.00119141
VP3	2327	A	G	186	synonymous>A		0.00170312	0.00178125	0.00242188	0.00119922	0.00166406	0.00208594		0.0018125	0.00219531	0.00181641	0.00132813	0.00353906	0.0034375	0.0025625	0.00182812	0.00160938	0.0020625	0.00167188	0.00172656	0.00215625
VP3	2333	T	C	188	synonymous>G		0.00151563	0.00170312	0.00159375	0.00138672			0.00192188	0.00129687	0.00117969	0.00197656	0.00175781	0.00303125	0.00219531	0.00139063	0.00185156	0.00284375	0.0014375	0.00292969	0.00353125	0.00175
VP3	2334	T	C	189	F>L				0.00159766			0.0010625	0.00110938	0.00159375				0.00192188	0.00123438		0.00105469		0.00113281
VP3	2335	T	C	189	F>S														0.00111719		0.00169531
VP3	2336	T	A	189	F>L																		0.00266406	0.0046875	0.0120169	0.00176562
VP3	2336	T	C	189	synonymous>F		0.00129297				0.00138281	0.00175	0.00103125	0.00273437	0.00275	0.00179688	0.00292969	0.00314063	0.00317187	0.00199219			0.00121875	0.00114844	0.00197656
VP3	2337	A	G	190	I>V							0.00103906						0.00120312		0.00111719		0.0010625
VP3	2338	T	C	190	I>T		0.00154687	0.00133984							0.00108594	0.00101562	0.00103906	0.00217969	0.001375		0.00178125		0.00209375	0.00145313	0.0019375	0.0013125
VP3	2339	T	C	190	synonymous>I		0.00289844	0.00139063	0.00204687	0.00177344	0.00174219	0.0015625	0.00234375	0.00317187	0.00196875	0.00414062	0.00514062	0.00753125	0.00864062	0.00928125	0.00375	0.00221875	0.004	0.00432813	0.0028125	0.00217187
VP3	2340	A	G	191	T>A							0.00117969		0.001125		0.00105469		0.00123438	0.00228906	0.00109375	0.00146875		0.00171875	0.0015625	0.00167969	0.0011875
VP3	2341	C	T	191	T>M																		0.00120312
VP3	2342	G	A	191	synonymous>T									0.00117188				0.00210938	0.00102344
VP3	2342	G	C	191	synonymous>T		0.00105469	0.0016875	0.0035	0.00205469	0.0038125	0.00467187	0.003625	0.00478125	0.0041875	0.00572656	0.0084375	0.0129523	0.00941612	0.00121094	0.0100946	0.042722	0.164618	0.256836	0.322019	0.360578
VP3	2343	T	C	192	C>R				0.00135937		0.00128906	0.00176562	0.00127344	0.00103125				0.00114453	0.00103125				0.001625	0.00121875	0.00149219
VP3	2344	G	A	192	C>Y													0.00114062
VP3	2345	C	T	192	synonymous>C												0.00103125		0.00159375		0.00105469					0.00114062
VP3	2346	T	C	193	W>R		0.0018125	0.00108594		0.00109375	0.00107812	0.0013125	0.00126563	0.00175		0.00126563	0.002	0.00246875	0.0019375		0.00142187	0.00105469	0.00225	0.00166406	0.0015625	0.00120703
VP3	2349	T	C	194	Y>H			0.00108984	0.00111328		0.00107812		0.00140625		0.00220313	0.00139063	0.00136719	0.00263281	0.00121094	0.00150781	0.00184375		0.00158594	0.00191406	0.00153125
VP3	2350	A	G	194	Y>C		0.00104688							0.00114062				0.00125	0.00135156		0.00142969
VP3	2351	T	C	194	synonymous>Y		0.0010625	0.00134375	0.00105469		0.00101562	0.00175781	0.0010625	0.00159375	0.00128906	0.00143359	0.0020625	0.00201562	0.00139844	0.00160938	0.00129687	0.00109375	0.00126563	0.00153125	0.00148828
VP3	2353	A	G	195	Q>R								0.00116406	0.00129687			0.00147656	0.00165625		0.00104688		0.00190625	0.00178125	0.00117969	0.00124609
VP3	2354	A	G	195	synonymous>Q									0.0015625		0.00133594	0.00165625	0.00253125	0.00221875	0.00172656				0.00102734
VP3	2355	A	G	196	T>A		0.00164844			0.00145313	0.0018125	0.00175781	0.00209375	0.0021875	0.00214062	0.0016875	0.00142187	0.00327344	0.00199219	0.00192188	0.00175	0.00201562	0.00190625	0.00169531	0.00157422	0.00240625
VP3	2357	A	G	196	synonymous>T		0.00110938			0.00103125				0.00167188		0.00128125	0.00128125	0.00198438	0.00147656	0.00225781			0.00140234	0.00157031	0.00134375
VP3	2358	A	G	197	N>D									0.00151563				0.00114844	0.0018125		0.00153906		0.00178125		0.0011875
VP3	2359	A	G	197	N>S		0.00228906	0.00301563	0.0079375	0.00865625	0.0094375	0.00846875	0.00790625	0.00929276	0.00909375	0.00317969	0.00314063	0.005125	0.00257813	0.00282812	0.00128125	0.00196875	0.00248437	0.00158594	0.00160938	0.00126953
VP3	2360	C	T	197	synonymous>N											0.00107812	0.00170312	0.00145313	0.00115625	0.00203906					0.00144141
VP3	2361	A	C	198	I>L		0.00235156	0.00546875	0.00610938	0.00389844	0.0033125	0.00291406	0.002
VP3	2361	A	G	198	I>V		0.00159375		0.001125		0.00104297	0.00107812	0.00115625	0.00132813		0.00159766	0.0019375	0.00305469	0.0025	0.00179688	0.00251562	0.00157813	0.00325	0.00264062	0.00234375	0.00214062
VP3	2361	A	T	198	I>L				0.0015	0.00119531
VP3	2362	T	C	198	I>T		0.00104297						0.00129687		0.00140625			0.0024375	0.00111719		0.0014375		0.00165625		0.00136328
VP3	2363	A	G	198	I>M	0.00108594	0.0115132	0.0207237	0.0277755	0.0219778	0.0179071	0.0134252	0.0083125	0.0059375	0.0051875	0.00442187	0.00451563	0.00592188	0.00410938	0.00320312	0.00141406	0.00138281	0.00140625	0.00109375	0.00124219	0.00111719
VP3	2365	T	C	199	V>A		0.00125	0.0011875	0.00136719	0.00123438		0.00135937	0.00114062			0.00102344	0.00107812	0.00167969	0.00121875				0.00104688	0.00102344	0.00115625	0.00109375
VP3	2366	G	A	199	synonymous>V								0.00124219					0.00186719	0.00103125		0.00282812	0.00279688	0.00196875	0.00129687	0.00295312	0.00128125
VP3	2367	G	A	200	V>I		0.00105469	0.00138281	0.00225781	0.00184375
VP3	2368	T	C	200	V>A	0.00142187	0.00183594	0.00228125	0.00160156	0.00159375	0.00128906	0.00185156	0.00245313		0.00254688	0.00115625	0.00109375	0.00208594	0.00182031	0.00164062	0.00159375	0.00207031	0.00133594	0.001875	0.00159375	0.00176562
VP3	2369	C	A	200	synonymous>V																			0.00111719	0.00142969
VP3	2369	C	T	200	synonymous>V									0.00120312	0.00110938			0.00124219
VP3	2372	A	G	201	synonymous>P		0.00137109		0.00125	0.00114844	0.00113672	0.00141016	0.00108594	0.00179688	0.00176562	0.00141016	0.00198438	0.00257813	0.002375	0.00170312	0.00217187	0.00192188	0.00185938	0.00192188	0.00155469
VP3	2375	G	A	202	synonymous>A				0.00104688											0.00146094
VP3	2377	A	G	203	D>G				0.0010625			0.00128125		0.001875			0.00135156	0.0016875	0.00128125		0.00132031	0.00102734	0.00110938	0.00129687	0.00119531	0.00105469
VP3	2378	T	C	203	synonymous>D		0.00126172	0.00121875	0.00151563	0.00105859	0.00105469	0.00170312	0.00105469		0.00160156	0.00157813	0.00207031	0.00415625	0.0026875	0.00263281	0.00146875		0.0014375		0.00128906	0.00103125
VP3	2379	G	A	204	A>T		0.0025	0.00442969	0.00625	0.005375	0.00375	0.00265625	0.0024375	0.0038125	0.0015	0.00130469	0.001625
VP3	2380	C	T	204	A>V		0.00390625	0.0254112	0.0598273	0.0828125	0.101933	0.108717	0.125082	0.116283	0.112418	0.0912829	0.0822368	0.0872944	0.12352	0.335711	0.0224507	0.025699	0.026912	0.0330592	0.041324	0.041509
VP3	2382	C	A	205	Q>K								0.00147656
VP3	2382	C	T	205	Q>*									0.00189062											0.00100781
VP3	2383	A	G	205	Q>R																0.00141406		0.00127344	0.001125
VP3	2384	A	G	205	synonymous>Q								0.00185156					0.00183594			0.00110156
VP3	2384	A	T	205	Q>H									0.00175
VP3	2385	A	G	206	S>G		0.00401562	0.009125	0.0124589	0.0126131	0.00992187	0.00823438	0.00778125	0.00671875	0.00565625	0.00369531	0.00415625	0.00521875	0.00460937	0.00232813	0.00267969		0.00228125	0.00148437	0.00129687	0.00112891
VP3	2387	C	T	206	synonymous>S														0.00170312	0.00144531	0.0058125	0.00475781	0.0036875	0.00335938	0.00139063	0.00234375
VP3	2388	T	C	207	S>P		0.00165625	0.0010625	0.00220313		0.0013125	0.00180859	0.00146094		0.00185938	0.00115625	0.001375	0.0023125	0.00253125	0.00189062	0.00189062	0.00185156	0.00155078	0.0016875	0.00164062	0.00189844
VP3	2391	T	A	208	C>S		0.00134375	0.00184375	0.00266406	0.00208594		0.00120703
VP3	2391	T	C	208	C>R		0.001875	0.00117188	0.00150781			0.00105469	0.00163281	0.00179688	0.00104688	0.00199219	0.00182031	0.00267969	0.00250781	0.001125	0.002125	0.00148437	0.0011875	0.00173438	0.0014375	0.00167188
VP3	2392	G	C	208	C>S			0.00164062	0.00163672
VP3	2393	T	C	208	synonymous>C		0.00160156	0.00153125	0.00211328	0.00144922	0.00172656	0.0010625	0.00188281	0.00196875	0.0015625	0.00208594	0.00378125	0.0040625	0.00290625	0.0021875	0.0010625	0.00232813	0.00320312	0.0029375	0.00176562	0.00110938
VP3	2394	T	C	209	Y>H			0.0014375					0.00139844	0.00189844		0.00128125	0.001375	0.00276563	0.001625	0.0015625	0.00126563	0.00107812			0.00120703
VP3	2395	A	G	209	Y>C		0.00233594	0.0033125	0.00251562	0.00149219		0.00124219	0.00104688	0.00110938	0.00128125	0.001375	0.00166406	0.00235937	0.00176562	0.00141797	0.0014375	0.00160938	0.00167188	0.00121094	0.00132031
VP3	2396	C	T	209	synonymous>Y									0.00110938			0.00117969	0.00117969	0.00146875		0.0035	0.00375781	0.003625	0.00269531	0.00142187	0.00147656
VP3	2397	A	G	210	I>V									0.00117188			0.00160156	0.00160156	0.00114062	0.00175781			0.00199219	0.00175781	0.00111719	0.00113281
VP3	2398	T	C	210	I>T		0.00158594	0.0015625	0.00227344	0.00140625	0.00109375	0.00251562	0.00247656		0.00110938	0.001875	0.00194531	0.00373437	0.00192188	0.00178125	0.00373437	0.0019375	0.00213281	0.00175	0.00144922	0.00171094
VP3	2399	C	T	210	synonymous>I									0.00104688				0.0014375
VP3	2400	A	G	211	M>V		0.00110938		0.00132422			0.00135937	0.00125781	0.00107031	0.0015625	0.00100781	0.00135156	0.00185938	0.00145313	0.001625	0.00284375	0.0011875	0.00155469		0.00128906
VP3	2401	T	A	211	M>K									0.00142187
VP3	2401	T	C	211	M>T	0.00128125	0.00335938	0.0020625	0.00175	0.00164062	0.00183594	0.00192969	0.00295312	0.00129687	0.0014375	0.00194531	0.00371875	0.0055	0.00352344	0.00136719	0.00184375	0.00216406	0.0021875	0.00238281	0.00215625	0.001125
VP3	2402	G	A	211	M>I									0.00119531									0.0011875	0.00103125
VP3	2403	T	A	212	C>S									0.00135937
VP3	2403	T	C	212	C>R		0.00101562	0.00108594	0.00135937	0.001625		0.00126172	0.00238281	0.001625	0.00154687	0.00121094		0.00175	0.0014375		0.00132031	0.00183594	0.00203125		0.00129297	0.00101562
VP3	2405	T	C	212	synonymous>C	0.00125	0.00186719	0.00219531	0.002	0.00171875	0.00172656	0.0028125	0.00233594	0.00246875	0.00332812	0.00196484	0.00184375	0.00365625	0.00239062	0.00379688	0.00322656	0.00271875	0.00207031	0.0018125	0.00190234	0.00245313
VP3	2406	T	C	213	F>L		0.00314063	0.00578125	0.00639063	0.00471875	0.00345313	0.00354687	0.0018125	0.00146875		0.00189062	0.00115234	0.00167969	0.00282031	0.002125	0.00197656		0.00132813	0.00178125	0.00135937
VP3	2407	T	C	213	F>S		0.00189062	0.00124219	0.00116406			0.0015625	0.0014375	0.00147656		0.00124219	0.00107031	0.00215625	0.00115625	0.00126172	0.00164062	0.00100781	0.00164844		0.00125781	0.00125781
VP3	2408	C	T	213	synonymous>F							0.00160938				0.00103125	0.00127344	0.0020625	0.00128906	0.00104297
VP3	2409	G	A	214	V>M												0.00107812					0.00109375
VP3	2410	T	C	214	V>A	0.00111719	0.00122656	0.00115625	0.00150781	0.0015625	0.00121875	0.00141797	0.00150781	0.00115625	0.0013125	0.00130469	0.00145313	0.00190625	0.00172656	0.00133594	0.00125	0.0020625	0.00207813	0.00126563	0.00114062	0.00110156
VP3	2411	G	A	214	synonymous>V												0.00159375	0.00222656	0.00145313	0.00142969
VP3	2412	T	C	215	S>P		0.00114844	0.00117188	0.00117969	0.0011875	0.00113672	0.00115625	0.00107031		0.00129687	0.00127344	0.00134375	0.00164844	0.00126563	0.00125	0.0011875	0.00155469	0.0011875	0.0014375	0.00122656
VP3	2414	A	G	215	synonymous>S		0.00272656	0.00282812	0.00305469	0.00296875	0.0035625	0.00374219	0.00379688	0.00385937	0.00277344	0.00257031	0.00264062	0.00409375	0.00360938	0.00300781	0.00257031	0.002	0.00213281	0.00190625	0.00264844	0.00239062
VP3	2417	A	G	216	synonymous>A		0.00108594						0.00111719			0.00116406	0.00108594	0.002	0.00104297			0.00148437	0.0015	0.00122656
VP3	2418	T	C	217	C>R		0.00162891	0.00107422		0.00109375				0.00102344		0.0011875	0.00126172	0.00225		0.00185938		0.00142969	0.00121875	0.00126563	0.0014375
VP3	2420	C	T	217	synonymous>C				0.00128125						0.00125		0.00129687	0.00223438	0.00119531	0.00203125			0.00132031		0.00103906
VP3	2421	A	G	218	N>D		0.00145703				0.00121094	0.00133594	0.0013125			0.00119141	0.001875	0.00196875	0.00149219	0.00124609	0.00153906	0.00209375	0.003	0.00280469	0.0045625	0.001625
VP3	2422	A	G	218	N>S		0.00223438	0.00125	0.00132813	0.0011875	0.00157813	0.00251562	0.00257031	0.00210938	0.00242188	0.00216406	0.0031875	0.00448438	0.00204687	0.00189062	0.00238281	0.00311719	0.00271094	0.00207031	0.00237891	0.00189062
VP3	2423	T	C	218	synonymous>N		0.0016875	0.00158594	0.00187891	0.00196875	0.00147656	0.00167188	0.00114844	0.00185938	0.00225	0.00330469	0.00532812	0.00878125	0.00501563	0.00175	0.00176562	0.00132031	0.00252344	0.0025	0.00208594	0.002
VP3	2425	A	G	219	D>G	0.00112109	0.00154297			0.00135156	0.00117188	0.0019375	0.00110938	0.002125	0.00178125	0.00135937	0.00117969	0.00273437	0.00198438	0.00132031	0.00248437	0.00125	0.00203125	0.00221875	0.00154687	0.00141406
VP3	2426	C	T	219	synonymous>D							0.00120312		0.00121875	0.00100781	0.00148437	0.00186719	0.00207031	0.00105859
VP3	2427	T	C	220	F>L	0.00116016	0.00135156	0.00186719	0.002	0.00223438	0.00201562	0.00207031	0.00160156	0.00129687	0.00215625	0.00236719	0.00239062	0.003625	0.00258594	0.00215625	0.00210938	0.00172656	0.002125	0.00240625	0.00260937	0.00143359
VP3	2428	T	C	220	F>S		0.00151563	0.00184375	0.00134375	0.00102344	0.00104297	0.002125	0.00204687	0.00221875			0.00175781	0.00228125	0.0015625		0.001625	0.002	0.00197656	0.00225	0.00113672	0.00170312
VP3	2429	C	T	220	synonymous>F											0.0011875	0.00147656	0.00242188	0.00115234
VP3	2430	T	C	221	S>P	0.00129297	0.00184375	0.00223438	0.0019375	0.00100781		0.00165234	0.00221875	0.00235937	0.001625	0.00165625	0.00182031	0.002875	0.00239062	0.00128125	0.00233594	0.00177344	0.00232031	0.00175781	0.00178125	0.00222656
VP3	2432	T	C	221	synonymous>S		0.00241406	0.0010625	0.0014375	0.00145313	0.0020625	0.0024375	0.00189844	0.0025	0.00196094	0.00228125	0.002625	0.00348438	0.00367969	0.00251562	0.00227344	0.001875	0.00233594	0.00184375	0.00195312	0.00167188
VP3	2433	G	A	222	V>I													0.00107812
VP3	2434	T	C	222	V>A	0.00103906	0.00126563	0.00142969	0.00121094	0.00115625		0.00134375	0.00171875	0.002375		0.0015	0.0026875	0.00248437	0.00174219	0.001625	0.0015625	0.00129687	0.00140625	0.00145313	0.0015	0.00140625
VP3	2435	C	T	222	synonymous>V						0.00105859		0.00119531			0.00115625	0.00194531	0.00208594	0.001625	0.00171875			0.00117188	0.0011875
VP3	2436	A	G	223	R>G		0.00225781	0.0015	0.00285937	0.00184375	0.00143359	0.00165625	0.00251562	0.002375	0.00192188	0.00169141	0.00314063	0.00373437	0.00175	0.00301563	0.00303125	0.002375	0.00215625	0.00225	0.002625	0.00196875
VP3	2438	G	A	223	synonymous>R												0.00103906		0.00176562
VP3	2439	C	T	224	synonymous>L													0.00122656	0.00108594	0.00214062
VP3	2440	T	C	224	L>P		0.00163281	0.00103125	0.00157813	0.00140625			0.00110938		0.00119531	0.00123438		0.00296875	0.00117188	0.00122656	0.00128125	0.00203125	0.0014375	0.00127344	0.00190234	0.00103516
VP3	2441	A	G	224	synonymous>L				0.00102734	0.00121484			0.00103906	0.00136719	0.00201562		0.00145313	0.00232813	0.00175	0.00190625		0.00150781	0.00169531	0.00153125	0.00136719	0.00108203
VP3	2441	A	T	224	synonymous>L															0.00125781
VP3	2442	T	C	225	synonymous>L		0.00251562	0.00184375	0.00160156	0.00157813	0.00114453	0.00159375	0.00313281	0.00133594	0.00282812	0.00176562	0.00182812	0.00444531	0.00217187	0.00192188	0.00173438	0.00125781	0.00139844		0.00159375	0.00115625
VP3	2443	T	C	225	L>S		0.00108984					0.00142969				0.00158594	0.00189844	0.00265625	0.00230469	0.00123828			0.00171094	0.00140625	0.00104688	0.00117188
VP3	2444	G	A	225	synonymous>L													0.00135937	0.00171875
VP3	2445	A	G	226	K>E		0.0011875								0.00135156		0.00142578	0.0021875	0.00182812	0.00126563	0.0016875	0.00133594	0.00235937		0.00124609	0.00124219
VP3	2446	A	G	226	K>R		0.0023125	0.00146094	0.00246875	0.00177344	0.0015	0.00170312	0.00141406	0.00198438	0.00129687	0.00219531	0.00235937	0.00410938	0.00396094	0.00215625	0.0015625	0.00275	0.00304687	0.00182031	0.00184766	0.00196875
VP3	2447	G	A	226	synonymous>K									0.00100781				0.00114062
VP3	2449	A	G	227	D>G		0.00179688	0.00233594	0.00200781	0.00161328	0.00173438	0.00166797	0.00213281	0.0019375	0.001375	0.00279688	0.00252344	0.00264062	0.00384375	0.00246875	0.00225781	0.00198438	0.00314063	0.002125	0.00155078	0.0019375
VP3	2450	C	T	227	synonymous>D				0.00154297	0.00184375	0.00232813	0.00314063	0.0033125	0.00645312	0.0043125	0.00415625	0.0049375	0.00779688	0.00582812	0.00146875	0.0011875			0.00139063	0.00112891
VP3	2451	A	G	228	T>A	0.0011875	0.00175	0.0020625	0.00203125	0.0015625	0.0014375	0.00213281	0.00225	0.00264844	0.0020625	0.00207813	0.00147656	0.00253125	0.00176562	0.00185938	0.00195312	0.00219531	0.0018125	0.00183594	0.00136719	0.00161719
VP3	2453	T	C	228	synonymous>T	0.00145313	0.0030625	0.00213281	0.00192188	0.00213281	0.00197656	0.00197656	0.0025	0.001875	0.00196094	0.0024375	0.00292969	0.00391406	0.00283594	0.00302344	0.00242188	0.00221875	0.00177344	0.00164062	0.00175	0.0024375
VP3	2456	T	C	229	synonymous>P	0.00110938	0.00325	0.00195312	0.00217187	0.00265625	0.0025	0.00210156	0.00292969	0.00239062	0.00198438	0.00339062	0.00399219	0.00620313	0.00304687	0.00371094	0.0025625	0.00364844	0.0041875	0.00386719	0.00363281	0.00355469
VP3	2457	T	C	230	F>L		0.00366406	0.00199219	0.00204687	0.00101172	0.00107812	0.00207813	0.00108203	0.00171875		0.00164844	0.00226562	0.00354687	0.00248437	0.00175	0.00217969	0.00177344	0.00246875	0.0025	0.001625	0.00146094
VP3	2458	T	C	230	F>S		0.00153125	0.00140625	0.00125	0.00103906	0.00107812		0.00161719	0.00130469	0.00101562		0.002	0.00217969	0.00179688			0.00146094	0.00171094	0.00142187	0.00109375	0.00159375
VP3	2460	A	G	231	I>V		0.00176562	0.00147656	0.00314844	0.00297656	0.002125	0.00290625	0.0035	0.00453125	0.00670312	0.00345313	0.00515625	0.004625	0.00271094	0.00153125			0.00110938
VP3	2461	T	C	231	I>T	0.00139063	0.00223438	0.0014375	0.0015	0.00135937	0.0020625	0.00196875	0.00148437	0.00171875	0.00138281	0.0016875	0.00249219	0.00402344	0.00175		0.00179688	0.00173438	0.0033125	0.00235156	0.00176562
VP3	2462	T	C	231	synonymous>I		0.00191797	0.00157422	0.00133984	0.0011875		0.00114062	0.00124219	0.00110156	0.0018125	0.00106641	0.00285937	0.00259375	0.00178125	0.00146094	0.00296875	0.00271875	0.00798437	0.008	0.0128495	0.00591406
VP3	2463	T	C	232	S>P													0.00139063
VP3	2465	G	A	232	synonymous>S			0.00144141							0.00110938		0.00148437	0.0028125	0.00174219		0.00109375		0.00120703			0.00121094
VP3	2467	A	G	233	Q>R		0.00257813	0.00166406	0.00171875		0.00173438	0.0019375	0.00128125	0.00111719	0.00135156	0.00166016	0.00179688	0.0035	0.00203125	0.00225781	0.00158594	0.00183594	0.00358594	0.00273437	0.00259375	0.00139844
VP3	2468	G	A	233	synonymous>Q													0.0015625					0.00109375		0.00105859
VP3	2469	C	A	234	Q>K												0.00232813	0.0131373	0.0975329	0.00215625	0.853618	0.821299	0.667172	0.559951	0.461009	0.386338
VP3	2469	C	G	234	Q>E																0.00103125
VP3	2470	A	G	234	Q>R	0.00423437	0.00108594								0.0010625				0.00315625	0.0131785	0.003875	0.00551562	0.00728125	0.00209375	0.00146094	0.00137109
VP3	2470	A	T	234	Q>L															0.0021875	0.00398437	0.0103207	0.0223067	0.00962171	0.00638281	0.00573438
VP3	2471	A	G	234	synonymous>Q														0.00132031	0.00121875			0.00180469
VP3	2472	A	G	235	N>D												0.00128906	0.00120312	0.00207031		0.0025625	0.00188281	0.0045625	0.00225781	0.00242969	0.00132031
VP3	2472	A	T	235	N>Y												0.00110156
VP3	2473	A	C	235	N>T																		0.00122656		0.00105469	0.00103125
VP3	2473	A	G	235	N>S		0.00145313	0.00119531	0.00146094	0.00164844	0.00185156	0.00196094	0.00150781	0.00303125	0.00121875	0.00160938	0.0021875	0.00196875	0.0026875	0.00283594	0.00207813	0.00301563	0.00653125	0.00496875	0.00378906	0.00210938
VP3	2475	T	C	236	F>L	0.00264062	0.00410156	0.00440625	0.0044375	0.0040625	0.00353125	0.00378125	0.00230469	0.00409375	0.00489062	0.00477344	0.00589063	0.00614063	0.0065	0.00315625	0.00373437	0.00561719	0.00545313	0.0049375	0.00517188	0.00489844
VP3	2477	T	C	236	synonymous>F		0.00122266		0.00190625		0.00105469	0.00219531	0.00171094	0.00248437	0.00164844	0.00205469	0.002125	0.00278906	0.00423437	0.00295312	0.0151316	0.0182771	0.0196546	0.01875	0.0133635	0.0142064
VP3	2478	T	C	237	F>L													0.00113281	0.00275	0.00176562	0.00199219	0.00153906	0.00142578	0.00186719	0.00103125
VP3	2479	T	C	237	F>S	0.00121875	0.00145313	0.00129687	0.00248437	0.00167969		0.00145313	0.0013125	0.00195312	0.00164844	0.00107812	0.00165625	0.00135937			0.00103906	0.00182031	0.00175781	0.00123438	0.001125
VP3	2480	C	T	237	synonymous>F											0.00107031	0.00153125	0.00155469	0.00107422
VP3	2482	A	G	238	Q>R		0.00267969	0.00186719	0.00244531	0.00235937	0.00220313	0.0019375	0.001375	0.00154687	0.00146875	0.00228125	0.00379688	0.00323438	0.0051875	0.00270312	0.00246094	0.00160156	0.00276563	0.00175	0.002125	0.00234375
VP3	2482	A	T	238	Q>L									0.00146094
VP3	2483	G	A	238	synonymous>Q		0.00157031	0.00114062	0.00104688	0.00134375	0.00196875			0.00102344		0.00221484	0.00398437	0.006	0.00198438	0.00127344		0.00110547	0.00253125
VP1	2484	G	A	1	G>S													0.00110156
VP1	2486	C	T	1	synonymous>G											0.00182812	0.00315625	0.00317187	0.00309375
VP1	2488	C	T	2	P>L													0.00113281
VP1	2489	A	G	2	synonymous>P		0.00171875	0.00117578	0.00174219	0.00175781	0.00153906	0.00203125	0.00126563	0.00159375	0.00229687	0.00180469	0.0024375	0.00264062	0.00273437	0.00239844	0.00107812	0.00220313	0.00179688	0.00160938	0.00216406
VP1	2490	G	A	3	V>M												0.00108594	0.0013125	0.00127344	0.00101562			0.00189062	0.0011875
VP1	2491	T	C	3	V>A		0.00110547	0.00129297		0.00175781	0.00125	0.00146875	0.00149219			0.00114844	0.00166406	0.00295312	0.00153125		0.00114844	0.00129687	0.00130469	0.00141406	0.00142969
VP1	2491	T	G	3	V>G														0.0013125	0.00209375	0.00657813	0.00529687	0.00203125	0.00204687	0.00253125	0.00628125
VP1	2494	A	G	4	E>G		0.00103125		0.00203125	0.00241406	0.00110156	0.0014375	0.00148437	0.00184375	0.0020625	0.00105469	0.00246094	0.00288281	0.00246094	0.00228125	0.00307812	0.00165625	0.00221875	0.0019375	0.00175	0.0015625
VP1	2495	A	G	4	synonymous>E	0.0015	0.00346094	0.00308594	0.00342187	0.00428906	0.00349219	0.00466406	0.00498438	0.003	0.00495313	0.00448438	0.00265625	0.00446875	0.00407813	0.00439062	0.00367187	0.0035	0.00378125	0.00409375	0.00317969	0.00295312
VP1	2496	G	A	5	D>N															0.00121875			0.00169531	0.00197656	0.00160156	0.00221094
VP1	2497	A	G	5	D>G	0.0011875	0.00165625	0.0013125	0.0030625	0.00176562	0.00197656	0.00205469	0.00158594	0.00200781	0.00189844	0.00257031	0.00239062	0.00279688	0.00267188	0.002625	0.00320312	0.00283594	0.00246875	0.00190625	0.002375	0.00220313
VP1	2498	C	T	5	synonymous>D											0.00142578	0.00146875	0.00203125	0.00134375	0.0020625	0.0025	0.00257813	0.0028125	0.00211719	0.00182812	0.00164844
VP1	2501	G	A	6	synonymous>A					0.00128125	0.00117969		0.00176562	0.00160938	0.00114844	0.00148437	0.00165625	0.0020625	0.00196094			0.00146875			0.00114062
VP1	2502	A	G	7	I>V		0.00110156	0.00210156	0.00432813	0.0075	0.00764062	0.00972451	0.0105263	0.013199	0.0118215	0.00971423	0.0106702	0.0130345	0.0179687	0.0677632	0.0094375	0.0134046	0.0236842	0.023602	0.022759	0.0242599
VP1	2503	T	A	7	I>K																				0.00103125
VP1	2503	T	C	7	I>T		0.00114062	0.0015								0.00116016	0.00159375	0.00228125		0.00134375	0.00164062	0.00302344	0.00290625	0.00229687	0.00199219	0.00164062
VP1	2503	T	G	7	I>R				0.00117188
VP1	2504	A	G	7	I>M				0.00108594			0.00129687	0.0018125	0.001125	0.00140625	0.00124219	0.00175	0.00125	0.0010625	0.001875	0.002875	0.00195312	0.00239062	0.00127344	0.0023125	0.0016875
VP1	2504	A	T	7	synonymous>I																0.001625
VP1	2505	A	G	8	T>A			0.00103906	0.00178906			0.00135937			0.00126563	0.00104688	0.001375	0.00173438	0.00111719	0.00133594	0.00192969		0.00167188		0.00121094
VP1	2507	A	G	8	synonymous>T		0.00139063		0.00179688	0.00124219	0.00117969	0.00217187	0.00105469	0.00178125		0.00138281	0.00182031	0.00169531	0.00175	0.00209375	0.00276563	0.00185938	0.00214062	0.00135937	0.00141797	0.00103906
VP1	2508	G	A	9	A>T														0.00146875		0.0019375	0.00264062	0.00146875	0.00170312	0.0011875	0.0020625
VP1	2509	C	T	9	A>V																0.00142187		0.0011875
VP1	2510	C	T	9	synonymous>A									0.00171875	0.00145313	0.001375	0.00126563	0.00215625	0.0025625	0.00119531		0.00125781	0.00116016			0.00125391
VP1	2511	G	A	10	A>T												0.00146875	0.00132813				0.001125		0.00102344
VP1	2513	T	C	10	synonymous>A		0.00303125	0.00260937	0.002125	0.001875	0.00183594	0.00217969	0.00182812	0.00115625	0.00126563	0.00295703	0.00551562	0.00579687	0.00398437	0.00170703	0.00167969	0.00178125	0.00307812	0.00129687	0.00185547	0.00221875
VP1	2514	A	G	11	I>V								0.00107031	0.00136719				0.00178906	0.00125781	0.00101172	0.00126563		0.00190625	0.00145313	0.00102344
VP1	2515	T	C	11	I>T		0.00115625	0.00112891	0.00128906	0.00106641	0.00124609	0.00116406				0.00134375	0.003375	0.00358594	0.00157813		0.00155469	0.001625	0.003875	0.00314063	0.00228125	0.00260156
VP1	2516	A	G	11	I>M		0.00226562		0.00139844		0.00111328	0.00149219	0.0026875	0.00175	0.00115625	0.00201562	0.0033125	0.00321094	0.00271875	0.00101562	0.00223438	0.00130859	0.00276563	0.00205469	0.00137109
VP1	2518	G	A	12	G>E							0.00117969
VP1	2519	G	A	12	synonymous>G												0.00118359	0.00146875	0.00115625
VP1	2520	A	G	13	R>G	0.00101953	0.00167969	0.00248437	0.00282031	0.00203906	0.00146875	0.00192188	0.00282031	0.00225	0.00279688	0.00154687	0.00228906	0.00234375	0.001875	0.003	0.00263281	0.00172656	0.00260937	0.00250781	0.00363281	0.0015625
VP1	2522	A	G	13	synonymous>R		0.00271094	0.00209375	0.00161719	0.00233594	0.00192188	0.00228125	0.0025	0.00226562	0.00232813	0.00342969	0.00245313	0.00378125	0.00332812	0.00234375	0.002875	0.00185938	0.00197656	0.00317187	0.00222656	0.0030625
VP1	2524	T	C	14	V>A		0.00102734			0.00120312			0.00167188	0.00119531	0.00159375		0.00134375	0.00108984	0.00220313	0.00117969	0.0013125	0.00123438		0.0014375	0.00133594
VP1	2525	T	C	14	synonymous>V		0.00116406					0.001375		0.0013125	0.00149219	0.00103906		0.001125		0.00109375					0.00100781	0.00103906
VP1	2527	C	T	15	A>V														0.0010625	0.00141406			0.00105469
VP1	2528	G	A	15	synonymous>A		0.00105469		0.00101562						0.00113281	0.0015	0.00121875	0.00135156	0.00125	0.00102344
VP1	2530	A	G	16	D>G								0.00133594			0.00102734	0.00100781	0.00154687	0.00120312	0.00138281	0.001125	0.0010625	0.00129687	0.00119141	0.00101172
VP1	2531	T	C	16	synonymous>D		0.0020625	0.00120312	0.00214844	0.00171875	0.00194531	0.00215625	0.00209375	0.00225	0.00202344	0.00221875	0.00360938	0.00346875	0.00315625	0.00303125	0.00133594		0.00155469	0.00140625	0.00110547	0.00119922
VP1	2532	A	G	17	T>A																0.00105469
VP1	2534	C	T	17	synonymous>T													0.00146875	0.00126563	0.00165625	0.00721875	0.0063125	0.0071875	0.0061875	0.00503125	0.00454688
VP1	2535	G	A	18	V>M		0.00132813										0.00165625	0.00314844					0.00140625
VP1	2536	T	C	18	V>A								0.001125		0.00120312		0.00107812	0.0015	0.00136719	0.00117188		0.00147656	0.00153125		0.00122656
VP1	2537	G	A	18	synonymous>V											0.00101562		0.00160938
VP1	2537	G	T	18	synonymous>V																0.00107812
VP1	2540	T	A	19	synonymous>G													0.00114844
VP1	2540	T	C	19	synonymous>G	0.00128906		0.00136719	0.00132813		0.00117188	0.00108594	0.00142187	0.00240625	0.00197656	0.00225391	0.0029375	0.00278125	0.00161719	0.00298437	0.00138281	0.00203906	0.00270312		0.00108594	0.0015
VP1	2541	A	G	20	T>A		0.00145313					0.00184375	0.00161719	0.0016875	0.00140625	0.00214844	0.00144531	0.00142969	0.00198438	0.00161719	0.0019375		0.00232813	0.0014375	0.001125	0.00107812
VP1	2543	A	G	20	synonymous>T		0.00241406	0.00132813	0.00182031	0.00235937	0.00225	0.0019375		0.00159375	0.00177344	0.00257031	0.00296875	0.00357813	0.00371094	0.00196875	0.00321875	0.002875	0.00279688	0.00267188	0.00204687	0.00226562
VP1	2544	G	C	21	G>R							0.00114453									0.00146875
VP1	2546	G	A	21	synonymous>G													0.00102734
VP1	2549	A	G	22	synonymous>P			0.00122656	0.00124219	0.00103125	0.00114062	0.00164062	0.0013125	0.00110156		0.00124609	0.00221094	0.00123047	0.00228125	0.00153125	0.00104688		0.00185938	0.00172656	0.00160938	0.00205469
VP1	2550	A	G	23	T>A		0.00163281	0.0019375	0.00208594	0.00224219	0.0026875	0.0035	0.00365625	0.0048125	0.00473438	0.00598437	0.00457813	0.00304687	0.00313281	0.00167188	0.00167188		0.00208594	0.00214062	0.00182812
VP1	2552	C	T	23	synonymous>T			0.00121094	0.00163281	0.00130859		0.00278125	0.00170312	0.00190625		0.00101562	0.00133594			0.00170312	0.00126563	0.00165625	0.00157813		0.00192969
VP1	2553	A	G	24	N>D									0.00126563				0.00122656			0.00121875
VP1	2554	A	G	24	N>S									0.00167188					0.00122656	0.00120312	0.00128906	0.00112891	0.00105859		0.00103125
VP1	2555	C	T	24	synonymous>N									0.00117969				0.00160938
VP1	2556	T	A	25	S>T									0.00176562	0.002	0.00146875	0.00189062
VP1	2556	T	C	25	S>P				0.00120312		0.0013125			0.00107031		0.00132031	0.00151563	0.00245313	0.00157031	0.0010625		0.00177344		0.0015	0.00236719	0.0013125
VP1	2557	C	T	25	S>L																		0.001125		0.00133594
VP1	2558	A	G	25	synonymous>S				0.00102344					0.001375	0.00117969			0.00135937	0.00101562	0.00138281	0.00134375	0.00134375	0.00120312		0.00102344
VP1	2560	A	G	26	E>G									0.00103906			0.00102344	0.00123438	0.00210156	0.00125		0.00124609	0.00153125
VP1	2561	A	G	26	synonymous>E		0.00234375	0.00125	0.00188281	0.00120312	0.00280469	0.00277344	0.0028125	0.00367187	0.00353125	0.00434375	0.00496875	0.00853125	0.00510937	0.00371094	0.00351562	0.00273437	0.00471875	0.0033125	0.00327344	0.00315625
VP1	2564	T	C	27	synonymous>A		0.00508594	0.00340625	0.00482812	0.00444531	0.00565625	0.00553125	0.0048125	0.00384375	0.0036875	0.00557031	0.00923109	0.0109581	0.00746875	0.0041875	0.00282031	0.00175	0.00319531	0.0024375	0.00325	0.00211719
VP1	2565	A	G	28	I>V		0.00114062	0.00190625	0.00201562	0.00195312	0.00185938	0.00303125	0.00367187	0.00523438	0.00851563	0.00476563	0.00528906	0.00801563	0.00344531	0.0015	0.00132031		0.0014375
VP1	2566	T	C	28	I>T										0.00127344	0.0010625	0.00148437	0.00177344	0.00100391					0.00123047
VP1	2567	A	G	28	I>M		0.00107812		0.00103125							0.00111719		0.00133984		0.00103125	0.00139063			0.00110938
VP1	2569	C	A	29	P>Q							0.00127344
VP1	2570	A	G	29	synonymous>P		0.00180469	0.001875	0.00185938	0.0016875	0.00153906	0.00178516	0.0015	0.00178125	0.00140625	0.00109375	0.00126563	0.00225	0.00317187	0.00159375	0.00203906	0.00182812	0.00210938	0.001875	0.00194922	0.00223438
VP1	2571	G	A	30	A>T																0.00121875
VP1	2571	G	T	30	A>S												0.00211719	0.00257813
VP1	2573	A	C	30	synonymous>A																				0.00143359	0.00186719
VP1	2573	A	G	30	synonymous>A				0.0011875				0.00160938	0.0015	0.00174219		0.00105469	0.00148437	0.00192188	0.00103125			0.00107812	0.00177344		0.00110938
VP1	2575	T	C	31	L>P		0.00167188	0.00110938	0.0025	0.00165625	0.00152344	0.00159375	0.00170312	0.00164062	0.00160156		0.00150781	0.00121094	0.00173438	0.0015625	0.00177344	0.00179688	0.00146875	0.00189062	0.00173438	0.00163281
VP1	2576	C	T	31	synonymous>L														0.00114062	0.001375
VP1	2577	A	G	32	T>A									0.001375			0.00121875		0.00111328	0.00122656	0.00113281			0.00139844	0.00103125
VP1	2579	T	C	32	synonymous>T		0.00220313	0.00144141	0.00136719	0.00110547	0.00147656		0.00128906	0.00153906	0.002625	0.002125	0.00388281	0.00476563	0.0050625	0.00211719	0.00123438	0.00102344	0.00130078	0.00158203	0.00121484	0.00130469
VP1	2582	T	C	33	synonymous>A	0.00107031	0.00203906	0.00116016	0.00107031	0.00125	0.00186719	0.00115234	0.00221875	0.00195312	0.00178125	0.00214062	0.0025625	0.00285937	0.00271875	0.00285937	0.00197656	0.0018125	0.00142187	0.00164062	0.00136328	0.00171875
VP1	2584	C	T	34	A>V								0.00152344
VP1	2585	T	C	34	synonymous>A	0.00110938	0.00165625	0.0010625	0.00101562	0.00108594	0.00102344	0.0015	0.00147656	0.00200781	0.00196094	0.0015625	0.00224219	0.00272656	0.00299219	0.001875	0.00176562	0.00112109	0.00235937	0.00174219	0.00179688
VP1	2587	A	G	35	E>G		0.001625	0.00101562	0.00167969			0.00129687	0.00114844	0.00220313	0.0014375	0.001625	0.00123438	0.0015	0.00115625	0.00142969	0.001875	0.00159375	0.00189844	0.00164844	0.00117578
VP1	2589	A	G	36	T>A		0.00203906	0.00103516	0.00117969	0.0011875	0.00101953	0.00176562	0.00153125	0.00251562	0.001875	0.00173828	0.00260156	0.00285937	0.00289844	0.00208594	0.00264062	0.00171875	0.00228906	0.00186719	0.00178125	0.00153516
VP1	2591	G	A	36	synonymous>T									0.00120312	0.00124219		0.00225781	0.00239844	0.00171094	0.0093125				0.00108594		0.00125
VP1	2591	G	C	36	synonymous>T																				0.0015
VP1	2592	G	A	37	G>S																					0.00120312
VP1	2592	G	T	37	G>C																				0.00194531
VP1	2594	T	A	37	synonymous>G							0.00152344
VP1	2594	T	C	37	synonymous>G	0.00150781	0.00166797	0.00157813	0.00154687	0.00125	0.00255469	0.00265625	0.0033125	0.0026875	0.00289844	0.0025625	0.00325	0.00304687	0.00390625	0.0028125	0.00264062	0.00192188	0.00285937	0.002625	0.00285156	0.0028125
VP1	2596	A	G	38	H>R	0.0015625	0.00121094	0.00230469	0.00173438	0.00157813	0.00146875	0.00209375	0.0025625	0.00169531	0.00200781	0.001625	0.00221094	0.00239062	0.00192969	0.00178906	0.00217187	0.00235156	0.00249219	0.00147656	0.00258594	0.00246875
VP1	2598	A	G	39	T>A		0.00146875	0.00110938	0.00109766	0.00107812	0.00147266	0.00155469	0.00110938		0.00125	0.0020625	0.0010625	0.00189062	0.00224219	0.002125	0.00172656	0.00203125	0.00253906	0.00259375	0.00213281	0.00165625
VP1	2599	C	T	39	T>M													0.00115234					0.00198438
VP1	2600	G	A	39	synonymous>T				0.00134375							0.00146484	0.002125	0.00314063	0.002125	0.00175	0.00110156	0.00138281	0.00203906	0.00117578	0.00113672	0.00136719
VP1	2601	T	C	40	S>P	0.00122656	0.00205859		0.00185938		0.00119531	0.00176172	0.00234375	0.00103125	0.00189844	0.00128125	0.00182031	0.00165625	0.00244531	0.00126172	0.00192969	0.00185156	0.0028125	0.00229687	0.00189062	0.00170312
VP1	2603	A	G	40	synonymous>S		0.00232031	0.00167188	0.00125391	0.00142578	0.00195312	0.003125	0.00234375	0.00240625	0.00209375	0.00225781	0.00189062	0.0035	0.00274219	0.00284375	0.00154687	0.00214062	0.00203906	0.001125	0.00203906	0.00189844
VP1	2605	A	G	41	Q>R		0.00132031					0.00135156		0.00110938			0.0011875	0.00146094	0.00175781	0.00203125	0.00211719		0.00185938	0.00109375	0.00133594
VP1	2606	A	G	41	synonymous>Q		0.00129687		0.00146484		0.00159766	0.00204687	0.00108594	0.00214062	0.00265625	0.00252344	0.00153125	0.00285156	0.00235937	0.00598437	0.00365625	0.003375	0.004875	0.00333594	0.00383594	0.00267969
VP1	2607	G	A	42	V>I				0.00152734	0.001875	0.00379688	0.00467187	0.00828125	0.00859375	0.0115543	0.00801563	0.00921053	0.0147204	0.00434375
VP1	2608	T	C	42	V>A		0.00113672					0.00103125						0.00170312							0.00112109
VP1	2609	A	G	42	synonymous>V	0.00104688	0.00271094		0.00121875		0.00135937	0.00177344	0.002	0.0028125	0.00125	0.00242969	0.00292188	0.00340625	0.00496875	0.00357813	0.00203125	0.002625	0.00323438	0.00253125	0.00260937	0.00223438
VP1	2611	T	C	43	V>A			0.001125	0.00132813	0.00138281	0.00101953		0.001125			0.00119922			0.00145313	0.00145313	0.00130469	0.00140625		0.00145313	0.00104688
VP1	2612	G	A	43	synonymous>V								0.00123047		0.00189844	0.00196094	0.00115625	0.00199219	0.00223438	0.00278125						0.00111328
VP1	2615	G	A	44	synonymous>P								0.00110938						0.00178906					0.00110156	0.00107422
VP1	2615	G	T	44	synonymous>P				0.00110156	0.0010625		0.00261719	0.00304687
VP1	2616	G	A	45	G>S				0.00123438	0.00246094	0.00135937	0.00704688	0.00375	0.00132813											0.00140625
VP1	2618	T	C	45	synonymous>G	0.00151563	0.001125	0.00246094	0.00265625	0.00109375	0.0015	0.00175781	0.00217187	0.0010625	0.00190625	0.00220703	0.00209375	0.00153125	0.00295312	0.00180469	0.00151563	0.00139063	0.00199219	0.00178125	0.00139063	0.00133203
VP1	2619	G	A	46	D>N				0.00189844	0.00325		0.00503125	0.00121094
VP1	2620	A	C	46	D>A									0.00221875
VP1	2620	A	G	46	D>G	0.00117188	0.00166406	0.00136719	0.00276563	0.00182031	0.00203125	0.00245313	0.00241406	0.00153125	0.00204687	0.00253125	0.00183594	0.00227344	0.002375	0.00267188	0.0025625	0.00249219	0.00242969	0.00222656	0.00180469	0.0020625
VP1	2621	C	T	46	synonymous>D														0.00167969	0.0020625
VP1	2622	A	G	47	T>A	0.00103125	0.00233594	0.00124219	0.00228125	0.0018125	0.00194531	0.00229687	0.00203906	0.00190625	0.00179688	0.00193359	0.00215625	0.00244531	0.00250781	0.00255469	0.0025	0.00263281	0.00180469	0.00178516	0.00212891	0.0020625
VP1	2623	C	A	47	T>N																				0.0010625
VP1	2624	T	C	47	synonymous>T		0.0030625	0.00203125	0.00185156	0.00140625	0.00222656	0.00192969	0.00203125	0.0036875	0.00184375	0.00425	0.00598437	0.0107422	0.00790625	0.0103002	0.00189062	0.00123047	0.00280469	0.00334375	0.00150781	0.00201562
VP1	2625	A	G	48	M>V			0.00148437											0.00157031				0.0014375	0.00108594	0.00103125	0.00108203
VP1	2626	T	C	48	M>T		0.00119531		0.00111719					0.00101562		0.00146094	0.00142969	0.00199219	0.00189062		0.00117969		0.00219531	0.0013125	0.00104297
VP1	2628	C	T	49	Q>*														0.00134375
VP1	2629	A	G	49	Q>R		0.00198047	0.00105859	0.00221094	0.00152344	0.00140625	0.00180078	0.00176562	0.00296094	0.00223438	0.00205469	0.00171875	0.00289844	0.00215625	0.00276563	0.00228125	0.0019375	0.00241406	0.00228125	0.00240625	0.00127344
VP1	2631	A	G	50	T>A		0.00132422	0.00111719	0.00164062	0.00141406		0.00132813	0.00125781	0.00225	0.00107031	0.0015625	0.00167969	0.00248437	0.0025	0.00196484	0.00101562	0.0011875	0.00215625	0.00128125	0.00146094	0.00108984
VP1	2633	A	G	50	synonymous>T				0.00119531				0.00110938	0.00160938	0.00123438		0.00125781	0.00125781		0.00176562	0.0011875		0.00185938
VP1	2634	C	T	51	R>C																		0.001125
VP1	2638	A	G	52	H>R				0.00161719	0.00123828		0.00145313	0.00103125	0.00122656	0.00109375	0.00146484	0.00131641	0.00217187	0.00140625	0.00144531	0.00100781	0.00179688	0.00259375	0.00146875	0.00148437	0.00177344
VP1	2639	C	T	52	synonymous>H											0.00108594	0.00102344	0.00123438	0.00160938				0.00132031	0.00121875
VP1	2640	G	A	53	V>I													0.00110938
VP1	2641	T	C	53	V>A						0.00130469	0.00125781		0.00146875			0.00120312	0.00178125	0.00196875	0.00177734	0.00128906		0.00164062			0.00114062
VP1	2642	T	C	53	synonymous>V				0.00134375		0.00102734	0.001375	0.00132031	0.00113281	0.00135937	0.00175	0.00236719	0.002125	0.00401562	0.00264062	0.00317187	0.00366406	0.00385156	0.00328906	0.003	0.00265625
VP1	2643	A	G	54	K>E								0.00121094				0.00153906	0.00110156
VP1	2644	A	G	54	K>R		0.00117578			0.00104688	0.00114453	0.00132813			0.0018125	0.00194922	0.001875	0.00205469	0.00235937	0.0011875	0.00192969	0.00123438	0.00192969	0.00177344	0.00164062
VP1	2645	G	A	54	synonymous>K													0.001125
VP1	2646	A	G	55	N>D				0.00107422				0.00128516		0.00103125	0.00171484		0.00126563	0.00254688	0.00146094	0.00278906	0.00133594	0.0019375	0.00153125	0.00126563
VP1	2647	A	G	55	N>S							0.00117188	0.00117969	0.00227344		0.00135937	0.0015	0.00157813	0.00176562	0.00147266	0.00151563		0.00151563	0.00174219	0.00125
VP1	2648	C	T	55	synonymous>N									0.001625			0.00103906
VP1	2649	T	C	56	Y>H		0.00220703	0.00141406	0.00157031		0.00207813	0.00246094	0.00265625	0.00246875	0.0043125	0.003	0.0041875	0.00604687	0.00264062		0.00106641	0.00174219	0.00135156	0.00130469		0.00125781
VP1	2650	A	G	56	Y>C				0.00114844	0.00107812		0.00174219	0.00147656	0.00134375	0.00110156	0.00149219		0.00236719		0.00119531	0.00133594		0.00119531	0.00114844	0.00100391	0.002
VP1	2651	C	T	56	synonymous>Y				0.00171875	0.00164062	0.00132813	0.00205469	0.00125781		0.00170312	0.00119922		0.001375	0.00117188	0.00150781
VP1	2653	A	G	57	H>R							0.0010625				0.00104688	0.00101562	0.00126953		0.0013125	0.00164062	0.0013125	0.00121875
VP1	2654	T	C	57	synonymous>H	0.00107812	0.00172656	0.001375	0.00213281	0.00143359	0.00125	0.00215625	0.00178125	0.00167969	0.00275	0.00267969	0.00326563	0.00376562	0.00425	0.0031875	0.00257813	0.00153125	0.00234375	0.00274219	0.00278906	0.00282812
VP1	2655	T	C	58	S>P		0.00103125	0.00102734	0.00116406	0.00125391	0.00116406	0.00159375		0.00151563		0.00115625	0.00160156	0.0016875	0.00111719	0.00101172	0.00101562	0.00157031	0.0015625	0.00109766	0.00117578
VP1	2657	A	G	58	synonymous>S	0.00189062	0.00267969	0.00220313	0.00109375	0.00123438	0.0010625	0.00163281			0.002375	0.00204297	0.002	0.00126563	0.00166406	0.00147656	0.00142187		0.00165625	0.00178125		0.0010625
VP1	2658	A	G	59	R>G		0.00105859							0.00146875		0.0010625	0.00145313	0.00135156	0.00171875	0.00171875	0.00136719		0.002	0.001375
VP1	2660	G	A	59	synonymous>R															0.00123438
VP1	2661	T	A	60	S>T							0.00103906
VP1	2661	T	C	60	S>P	0.00125781	0.00134766	0.00191406	0.00139063	0.00145313	0.00133984	0.00119531		0.00161719		0.00126563	0.00175781	0.00199219	0.00129687	0.00176562	0.001875	0.00154687	0.00125781	0.00117578	0.001875	0.00170312
VP1	2663	C	T	60	synonymous>S			0.00146094				0.00144531	0.00154687				0.00103125	0.00153906	0.00120312	0.00184375		0.00135937	0.00128125	0.00245313	0.00232813	0.00226562
VP1	2665	A	G	61	E>G				0.0014375					0.00132813	0.00121875	0.00128516	0.001375	0.00142187	0.00126563	0.0013125	0.00165625		0.00133594		0.00168359
VP1	2666	G	A	61	synonymous>E									0.00138281	0.00125781		0.00125781
VP1	2667	T	C	62	S>P		0.00107031	0.00101172	0.00238281			0.00145313	0.00149219		0.00119531		0.00146875	0.00171094	0.00125781	0.00127344	0.00217187	0.00139063	0.00159375	0.00158984		0.00196875
VP1	2669	A	G	62	synonymous>S		0.00213281	0.00166406	0.00196875	0.00126953	0.00101562	0.0019375	0.00214062	0.00219531	0.0019375	0.00204687	0.00264062	0.00284375	0.0021875	0.00245313	0.00142969	0.0016875	0.00242969	0.00245313	0.00209375	0.0016875
VP1	2670	A	G	63	T>A		0.00115625	0.00145313	0.00119531	0.001625		0.00151563	0.00140625	0.0025625	0.00134375	0.00138672	0.00224219	0.00184375	0.00192188	0.0014375	0.00114062	0.00164844	0.0019375	0.00157813	0.00139844	0.00130469
VP1	2672	C	A	63	synonymous>T																				0.00133594
VP1	2672	C	T	63	synonymous>T				0.00185938								0.00110156	0.00227344
VP1	2673	A	G	64	I>V		0.00203906	0.00167578	0.00242969	0.00186719	0.00157031	0.00167188		0.002125	0.00145313	0.00219531	0.00248437	0.00410938	0.00278125	0.00129687	0.00134375	0.00108594	0.001875	0.00160156	0.0020625	0.00129687
VP1	2674	T	C	64	I>T										0.00121875	0.00122266	0.00210156	0.002875	0.00191406		0.00128906	0.00139844	0.001625
VP1	2675	A	G	64	I>M		0.00345313	0.00135547	0.00249219	0.00176562	0.0021875	0.00143359	0.00115625		0.0014375	0.00282031	0.00253906	0.00459375	0.00282812	0.00146094	0.002125	0.00204687	0.00345313	0.00198438	0.00189062
VP1	2677	A	G	65	E>G		0.0010625		0.0010625			0.00132813	0.00125781	0.00161719		0.00139063	0.00189062	0.00203125	0.00270312	0.00189062	0.0025	0.00151563	0.00230469	0.00185938	0.00145703
VP1	2679	A	G	66	N>D									0.00135937	0.00115625		0.00135937			0.00209375	0.00150781	0.00105859		0.0014375	0.00152344
VP1	2680	A	G	66	N>S			0.0015	0.00129687	0.00109375	0.00200781	0.00153906	0.00111719	0.00128125	0.00142969	0.001875	0.00201562	0.00296875	0.00275	0.00170312	0.00175		0.00223438	0.00204687	0.00227344	0.00198438
VP1	2681	C	T	66	synonymous>N							0.00140625	0.00144531							0.00252344
VP1	2682	T	C	67	F>L				0.00119531	0.00134375	0.00129687		0.00123438	0.00214062	0.00182812	0.00107031		0.00127344	0.00149219		0.00122656	0.0015	0.00153906	0.00125781	0.00163281	0.00135547
VP1	2683	T	C	67	F>S		0.00117188			0.00114062		0.00130469		0.00110938	0.00125			0.00128906		0.00132813	0.00123438	0.00115625	0.00159375	0.00128125	0.00146875
VP1	2685	C	T	68	synonymous>L													0.0010625	0.00102344
VP1	2686	T	C	68	L>P		0.00159375	0.00130469	0.00117969			0.00179688	0.00100781			0.002375	0.00328125	0.00467187	0.00210938		0.00182812	0.00125391	0.00310156	0.0023125	0.00178906	0.00107812
VP1	2687	A	G	68	synonymous>L		0.00185547	0.001125	0.00167188					0.0021875	0.0014375	0.0021875	0.00391406	0.0050625	0.00326563	0.00201562	0.001375		0.00270312	0.00138672	0.0015
VP1	2688	T	C	69	C>R		0.00116406	0.00254688	0.0020625	0.00125	0.00154687	0.00185156	0.00252344	0.00117188	0.00122656	0.00210547	0.00375	0.00388281	0.00439062	0.0015	0.0015	0.00160938	0.002375	0.00234375	0.00198438	0.00149219
VP1	2689	G	A	69	C>Y																		0.00135937
VP1	2690	T	C	69	synonymous>C		0.00137109	0.00164062	0.001125		0.0010625	0.00172656	0.00152344		0.00171875	0.00172656	0.00174219	0.0033125	0.0024375	0.0018125	0.00173438		0.00161719	0.00157813	0.002	0.00201562
VP1	2691	A	G	70	R>G		0.0016875		0.00126953			0.0015		0.00105469		0.00145703	0.001375	0.0024375	0.00210938	0.00141406	0.00100781	0.00134375	0.0013125	0.00192188	0.00117188
VP1	2693	G	A	70	synonymous>R														0.00110156
VP1	2694	T	C	71	S>P		0.00127734		0.00130078	0.00103125		0.00124219		0.00126563	0.00114844	0.00102344	0.00103125		0.001125	0.00125781	0.00196875	0.00159375	0.00192969	0.00157813		0.0014375
VP1	2696	A	G	71	synonymous>S		0.00197656	0.00128906	0.00178906	0.002	0.00172656	0.00221094	0.003125	0.00250781	0.00164844	0.00257422	0.00188281	0.00301563	0.003	0.00304687	0.00235156	0.00319531	0.00205469	0.00196875	0.00240625	0.00161719
VP1	2699	A	G	72	synonymous>A			0.00121094	0.00153906	0.00110156					0.00113281	0.00192969	0.00140625	0.0018125	0.00229687	0.00224219	0.00202344		0.00166406	0.00104688	0.00130469
VP1	2700	T	C	73	C>R		0.00101562					0.00115625					0.00102734					0.00175781	0.00124219		0.00120312	0.00134375
VP1	2702	C	T	73	synonymous>C					0.00109375	0.00126172			0.00151563	0.00179688	0.00153906	0.00219531	0.00139844	0.00185156	0.00136719			0.00125	0.0011875	0.00122656	0.00128125
VP1	2703	G	A	74	V>M																				0.00121875
VP1	2704	T	C	74	V>A		0.001875	0.00144531	0.00153906	0.00110156	0.00160938	0.00199219	0.0019375	0.0025625	0.00253125	0.00170312	0.00142187	0.00204687	0.00226562	0.00108203	0.00192969	0.00129687	0.00184375	0.00260937	0.00220313	0.00196875
VP1	2706	T	C	75	Y>H				0.00113281	0.00110156				0.00103125	0.00114844		0.0013125		0.00189062			0.00110156			0.00116016
VP1	2707	A	G	75	Y>C																0.00114844		0.00124219
VP1	2708	C	T	75	synonymous>Y					0.00100781								0.00198438	0.00116406
VP1	2709	T	C	76	F>L	0.00172656	0.00203906	0.0021875	0.00219531	0.0025	0.00175781	0.00219531	0.00158594	0.00204687	0.003375	0.0031875	0.0020625	0.00597656	0.00459375	0.00269531	0.00174219	0.00228906	0.00345313	0.00209375	0.00259375	0.00217187
VP1	2710	T	C	76	F>S				0.001125				0.00107031					0.00151563
VP1	2711	T	C	76	synonymous>F			0.00176562	0.00153125	0.00139063	0.00219531	0.0025625	0.00145313	0.00220313	0.00201562	0.00263281	0.0019375	0.00346875	0.00291406	0.00233594		0.00140625		0.00140625		0.00119531
VP1	2712	A	G	77	T>A	0.00225781	0.00226562	0.00239844	0.00257813	0.00204687	0.00191406	0.00282812	0.00207031	0.00307812	0.00234375	0.00215625	0.00221094	0.0025625	0.0013125	0.00117969
VP1	2713	C	T	77	T>M													0.00117188
VP1	2714	G	A	77	synonymous>T										0.001125		0.0015625	0.00160938		0.00107812		0.001375	0.00174219	0.00157031
VP1	2716	A	C	78	E>A							0.00120312
VP1	2716	A	G	78	E>G		0.00378125		0.001875	0.0011875	0.00275	0.0015	0.00217187	0.00199219	0.00177344	0.00273437	0.00348438	0.00559375	0.00317187	0.00201562	0.00307812	0.001625	0.002625	0.0025	0.0018125	0.00119531
VP1	2717	G	A	78	synonymous>E														0.00160938
VP1	2718	T	C	79	Y>H							0.00100781									0.00110156		0.0011875
VP1	2719	A	G	79	Y>C		0.00107812		0.00134375				0.00102344	0.00117969		0.00198828	0.00123438	0.00148437	0.00121875	0.00119531	0.00128906			0.00144531		0.001375
VP1	2720	T	C	79	synonymous>Y		0.00135547	0.00147656	0.00123047	0.001625		0.00141406	0.00124219	0.00167969	0.00253125	0.00240625	0.00425	0.00407813	0.0020625	0.002	0.00609375	0.00603125	0.0049375	0.0036875	0.003875	0.00353125
VP1	2721	A	G	80	K>E									0.00116406					0.00107812	0.0011875	0.00140625	0.00271875	0.00309375	0.00198438	0.00127344	0.00128906
VP1	2722	A	G	80	K>R													0.00160938	0.00110156	0.00125
VP1	2723	A	G	80	synonymous>K													0.00114062
VP1	2724	A	G	81	N>D							0.0011875		0.00123438				0.0018125	0.00184375	0.001625	0.00153125			0.00121875
VP1	2725	A	G	81	N>S									0.00100781							0.00110938
VP1	2727	T	C	82	S>P			0.00128125	0.00105469			0.00101562	0.00166406		0.001375				0.00101562	0.00128125		0.00149219	0.00127344		0.00130469
VP1	2729	A	C	82	synonymous>S																				0.00207813	0.0025
VP1	2729	A	G	82	synonymous>S	0.00142187	0.00180469	0.00225781	0.00290625	0.00171875	0.00153125	0.00288281	0.00182812	0.00125	0.00221875	0.00307812	0.00440625	0.00379688	0.00239844	0.00315625	0.00109375	0.00215625	0.0028125	0.001625	0.0025	0.00153125
VP1	2732	T	C	83	synonymous>G	0.00251562	0.00124219	0.0023125	0.0020625	0.0023125		0.00159375	0.00196094	0.00267188	0.0028125	0.00214062	0.0025	0.00219531	0.00320312	0.00192188		0.00217187	0.00183594	0.00139844	0.00128125	0.001125
VP1	2733	G	A	84	A>T								0.00179688							0.00134375
VP1	2735	C	T	84	synonymous>A		0.00108594								0.00175		0.00107812	0.00225	0.0019375		0.00133594		0.0019375		0.00128125	0.00123438
VP1	2736	A	G	85	K>E		0.00151563	0.00246875	0.00192188	0.00115625	0.00186719	0.0019375	0.00225781	0.00121094	0.00182812	0.00144531	0.00215625	0.00279688	0.00152344	0.001625	0.00160156	0.00215625	0.00273437	0.00135156	0.00208594
VP1	2737	A	G	85	K>R	0.001125	0.00239062	0.00191406	0.00101562	0.00154687	0.00192188	0.00246875	0.002875	0.00346875	0.00223438	0.00436719	0.00501563	0.0053125	0.0036875	0.00234375	0.00284375	0.00239844	0.00384375	0.002	0.00175
VP1	2738	G	A	85	synonymous>K															0.00107812	0.00115625	0.00215625
VP1	2741	G	A	86	synonymous>R														0.00102344
VP1	2742	T	C	87	Y>H	0.00130469											0.00122656			0.00107031	0.00129687	0.00148437			0.00110938	0.00105469
VP1	2743	A	G	87	Y>C		0.00128125		0.00104688	0.00135156		0.00125	0.00145313				0.0013125	0.00144531	0.00229687	0.00146875	0.00170312	0.0019375		0.00182812
VP1	2744	T	C	87	synonymous>Y		0.00110938	0.00108594	0.0011875	0.0019375	0.00203125	0.00170312	0.00289063	0.00217187	0.00214062	0.00383594	0.00367187	0.0031875	0.00232813	0.00132031	0.00104688	0.00157813	0.00225	0.00115625	0.00232813	0.00177344
VP1	2747	T	C	88	synonymous>A	0.00142187	0.00172656	0.00102344	0.00113281		0.00146094	0.00134375	0.0020625	0.00120312		0.00159375	0.00160156	0.00135937	0.00351562	0.00225	0.002	0.00141406	0.00253906	0.00221875	0.00207813	0.00135937
VP1	2749	A	G	89	E>G		0.00135156														0.00105469	0.00103125
VP1	2750	A	G	89	synonymous>E		0.00222656		0.00142969	0.00123438	0.00132813	0.00171094	0.0013125	0.001625	0.003125	0.00197656	0.00332812	0.0045	0.001625	0.00282812	0.0015625	0.0013125	0.00379688	0.00238281	0.00135156	0.00209375
VP1	2751	T	C	90	W>R													0.0014375	0.00132031		0.00109375
VP1	2754	G	A	91	V>I															0.00103125
VP1	2754	G	C	91	V>L																				0.00174219
VP1	2755	T	C	91	V>A	0.00125	0.00111328	0.00134375	0.00178906						0.00190625		0.00121875	0.00125	0.0019375	0.00125	0.00114062	0.0016875	0.00182812	0.00123438	0.00186719	0.00145313
VP1	2756	A	G	91	synonymous>V		0.00210938	0.00141406	0.00115625	0.00123438	0.00157813	0.00191406	0.00125781	0.00289063	0.0026875	0.00226562	0.0029375	0.00285156	0.003	0.00334375	0.00225	0.00304687	0.00246875	0.00325	0.00164062	0.00153125
VP1	2757	T	C	92	synonymous>L		0.00139063		0.00167188	0.00234375	0.00282812	0.00135937	0.00115625	0.00234375	0.00132031	0.00124219		0.00224219	0.001875	0.00157813		0.00201562	0.00110156	0.00125
VP1	2757	T	G	92	L>V								0.00153125		0.00160938	0.00194531	0.00251562	0.0016875
VP1	2758	T	C	92	L>S								0.0015										0.00126563	0.00116406	0.001125
VP1	2759	A	G	92	synonymous>L			0.00211719	0.00246875	0.00260156	0.00228125	0.00267188	0.003125	0.00179688	0.00153125	0.00246094	0.0035625	0.00478125	0.003	0.0028125	0.00139844		0.00129687	0.00178125	0.00171875	0.00196875
VP1	2760	A	G	93	T>A				0.00129687					0.00139063				0.0010625	0.00223438	0.00129687	0.00178125	0.001375	0.00223438		0.00126563
VP1	2762	A	G	93	synonymous>T	0.001125	0.00111719	0.00142187	0.003	0.00185156	0.00234375	0.00201562	0.00175	0.00207813	0.00342187		0.00228125	0.0033125	0.00182812	0.00289063	0.00176562	0.0021875	0.0023125	0.00140625	0.00159375	0.00196875
VP1	2763	C	A	94	P>T										0.0010625			0.0011875
VP1	2764	C	T	94	P>L				0.00107812									0.0015625
VP1	2765	A	G	94	synonymous>P		0.0019375	0.00130469	0.00190625	0.00107812	0.0010625	0.001625	0.00251562	0.00114062	0.00122656		0.0028125	0.0019375	0.003125	0.00221875	0.00100781	0.00170312	0.00151563	0.00251562	0.00184375	0.00103125
VP1	2766	C	A	95	synonymous>R														0.00110938
VP1	2766	C	T	95	R>*				0.00109375															0.00128125
VP1	2768	A	G	95	synonymous>R		0.00148437		0.00153125		0.00133594	0.00226562		0.00234375	0.001375	0.0019375	0.00163281	0.00326563	0.0023125	0.00251562	0.00171094		0.00176562	0.0023125	0.00164062	0.0019375
VP1	2770	A	G	96	Q>R							0.00160938		0.00128906	0.001375	0.00167969		0.00175			0.00109375			0.00102344	0.00166406
VP1	2771	A	G	96	synonymous>Q		0.00272656				0.00178125	0.00217187			0.001875	0.00110938	0.00190625	0.00184375	0.00320312	0.0024375	0.00303125	0.0014375	0.00204687	0.00103906	0.0018125	0.00158594
VP1	2772	G	T	97	A>S									0.0015625
VP1	2773	C	T	97	A>V										0.00119531							0.00126563
VP1	2774	A	G	97	synonymous>A	0.00134375	0.00295312	0.001125	0.00244531	0.00195312	0.00170312	0.00153125	0.00203125	0.002625	0.00165625	0.00198438	0.003125	0.002	0.0028125	0.00275	0.00207813	0.00323438	0.00265625	0.0036875	0.00178906	0.00159375
VP1	2775	G	T	98	A>S									0.00159375
VP1	2776	C	T	98	A>V														0.00107812
VP1	2777	A	G	98	synonymous>A	0.00104688	0.00178125		0.00198438	0.00125	0.002	0.00121094	0.00182812	0.00159375	0.0014375	0.00225781	0.00271875	0.002	0.003375	0.0030625	0.00126563		0.00151563	0.00267188	0.00278125	0.0015
VP1	2779	A	G	99	Q>R				0.00209375	0.00154687	0.00142969				0.00134375	0.00125	0.002625	0.001625		0.001875	0.00153125		0.00265625	0.0016875	0.0014375
VP1	2780	A	G	99	synonymous>Q			0.00155469		0.00149219	0.00121094	0.00125781		0.00178125	0.00123438	0.00217187	0.00169531	0.00229687	0.00204687	0.00185938	0.0020625	0.0019375	0.00257813	0.0014375	0.00175	0.00128125
VP1	2780	A	T	99	Q>H								0.00204687								0.001625
VP1	2781	C	T	100	L>F								0.00335938								0.00240625	0.00209375	0.00119531	0.00126563
VP1	2782	T	C	100	L>P							0.00178125		0.00145313	0.00135937	0.00126563	0.00107812	0.00154687	0.0021875			0.00109375	0.00164062	0.001625	0.00159375	0.00154687
VP1	2782	T	G	100	L>R								0.00307812								0.00367187	0.00157813
VP1	2783	T	A	100	synonymous>L					0.0011875		0.00126563	0.0044375								0.00521875	0.00196875
VP1	2783	T	C	100	synonymous>L		0.00136719	0.00165625			0.00117969	0.00145313	0.00116406			0.00119531	0.00275	0.0029375	0.0031875		0.0060625	0.006	0.006875	0.003375	0.00284375	0.00245313
VP1	2784	A	G	101	R>G		0.00534375	0.00102344	0.00201562		0.00178906	0.00146875	0.0011875			0.00329687	0.00529687	0.00509375	0.00326563	0.0015625	0.00189062	0.00146875	0.00221875	0.00240625	0.00251562	0.00146875
VP1	2786	G	A	101	synonymous>R													0.00107031
VP1	2787	A	G	102	R>G		0.00257031		0.00278125	0.00167188	0.00175	0.0026875	0.00190625	0.00275	0.0018125	0.00285937	0.0023125	0.00253125	0.00315625	0.00184375	0.00404688	0.00234375	0.00203125	0.00114062	0.00278125	0.00242188
VP1	2789	A	G	102	synonymous>R		0.00235937		0.00273437	0.00129687	0.00134375	0.0015	0.00264062	0.002	0.00228125	0.00247656	0.00409375	0.007125	0.00289063	0.00165625	0.0014375	0.00171094	0.0034375	0.00315625	0.00214844
VP1	2790	A	G	103	K>E		0.00117969		0.00110938				0.00107812				0.00115625	0.00200781	0.00228906		0.00101562		0.00129687		0.00102344
VP1	2791	A	G	103	K>R		0.00507812	0.0025	0.0035625	0.00248437	0.00209375	0.00289844	0.00428125	0.0033125	0.00328125	0.00322656	0.00375	0.00670312	0.0060625	0.00351562	0.00260937	0.00210938	0.003375	0.00292188	0.002625	0.0021875
VP1	2793	C	T	104	synonymous>L														0.00114062	0.00202344
VP1	2794	T	C	104	L>P	0.0751234	0.0346012	0.14741	0.149507	0.0418586	0.032648	0.0523437	0.139638	0.130664	0.133162	0.0633635	0.0612253	0.0563734	0.0719572	0.0495066	0.078639	0.0393503	0.0410979	0.0693257	0.076912	0.0716283
VP1	2795	A	C	104	synonymous>L	0.0732936	0.0328125	0.141103	0.142491	0.0385691	0.0301912	0.0504934	0.134396	0.125658	0.12683	0.0602796	0.0574013	0.0528989	0.0672286	0.0459704	0.0746711	0.03897	0.0393812	0.067537	0.0751645	0.0697368
VP1	2795	A	G	104	synonymous>L		0.00117578			0.00110352		0.00115625		0.00106641		0.00117969	0.00132813	0.00171875	0.00221875	0.00192578	0.00122266	0.00123438	0.00150391	0.00105469	0.00144531	0.00119531
VP1	2796	G	C	105	E>Q																			0.00160156
VP1	2797	A	G	105	E>G															0.00132422	0.00141406	0.00167188	0.00248437	0.00301563	0.00156641	0.00182422
VP1	2798	A	G	105	synonymous>E															0.00114844		0.00107812	0.00148047	0.00239062	0.00112109	0.00121875
VP1	2798	A	T	105	E>D	0.0736842	0.0333265	0.143277	0.144202	0.0389803	0.0304585	0.0512541	0.136523	0.126234	0.126316	0.0611123	0.0567023	0.0532072	0.0681743	0.0461246	0.0762541	0.0382401	0.0391036	0.0669819	0.0756579	0.0690584
VP1	2799	T	C	106	F>L	0.0751645	0.0348067	0.145898	0.14707	0.0415296	0.0338816	0.0534745	0.138929	0.128166	0.129688	0.064155	0.058861	0.0544408	0.0701686	0.0479852	0.0787212	0.0398437	0.0409437	0.0688939	0.0778166	0.0714227
VP1	2800	T	A	106	F>Y									0.001125
VP1	2800	T	C	106	F>S			0.00120312	0.00126563			0.00134961	0.0013125	0.00221094	0.00277344				0.00120703	0.00125			0.00122266	0.00135742
VP1	2802	T	C	107	F>L	0.00109766	0.00140234	0.00138672	0.00163281	0.00148437	0.00132422	0.00141016	0.00221289	0.00192188	0.00197656	0.00133105	0.00152344	0.00261719	0.00197461	0.00141797	0.00143359	0.00165625	0.00202148	0.00186133	0.00160547	0.00185352
VP1	2804	T	C	107	synonymous>F																		0.0010625		0.00109766	0.001125
VP1	2805	A	G	108	T>A													0.00103516
VP1	2819	C	T	112	synonymous>F							0.00195312	0.00139258		0.00109375	0.00109863		0.00100977		0.00116016
VP1	2821	A	C	113	D>A																					0.00119531
VP1	2821	A	G	113	D>G					0.00113672							0.00109766						0.00146094		0.00137109	0.00105859
VP1	2823	C	T	114	synonymous>L																				0.00100977
VP1	2824	T	C	114	L>P		0.00108984	0.00101758	0.00111328			0.00191211	0.00133984	0.00108984	0.00129395	0.00119922		0.00202344	0.00164062	0.0015	0.0015957	0.00136523	0.00157031	0.00142969	0.00156836	0.00138672
VP1	2825	G	A	114	synonymous>L																0.00250977	0.00212109	0.00201758	0.00146875
VP1	2827	A	G	115	E>G		0.00139844	0.001125	0.00144336	0.00135156	0.00116211	0.00143555	0.00151855	0.001375	0.00146094	0.00144531	0.00152344	0.00189062	0.00171875	0.00169141	0.00157422	0.00157813	0.00153516	0.00138672	0.0016875	0.00171484
VP1	2828	G	A	115	synonymous>E				0.00168555
VP1	2829	C	T	116	synonymous>L															0.00105469
VP1	2830	T	C	116	L>P		0.00119531	0.00131055	0.0013252	0.00143359	0.00100391	0.00119141	0.00153711	0.00129297	0.00146875	0.00158398	0.00169531	0.00177148	0.00176367	0.00162695	0.00171094	0.00163672	0.0016875	0.00143164	0.00175195	0.00145313
VP1	2832	A	G	117	T>A			0.00116406	0.0013291	0.00117773	0.00101953	0.0013457	0.00145703	0.00117383	0.00136914	0.00108984	0.0012793	0.00195703	0.00176758	0.00142969	0.00127148	0.00138281	0.00136133	0.00125	0.00161719	0.00142187
VP1	2833	C	T	117	T>M													0.00132422
VP1	2834	G	A	117	synonymous>T										0.00110742	0.00115039	0.00112891		0.00146875
VP1	2835	T	C	118	F>L		0.00107422	0.00106445	0.00128418	0.00133008		0.00166016	0.0013125	0.00121875	0.00119531	0.00138281	0.00141797	0.00139453	0.00157031	0.00159375	0.0018125	0.00146094	0.00127148	0.00137891	0.00158398	0.00151758
VP1	2837	T	C	118	synonymous>F		0.00113281		0.00101855	0.00107812	0.00104102	0.00110938	0.00116406	0.00121484	0.00157813	0.00146289	0.0021875	0.00160938	0.00211328	0.00178906	0.00119531	0.00147266	0.00114844	0.00110547	0.00124219	0.00123438
VP1	2838	G	T	119	V>F					0.0011582
VP1	2839	T	C	119	V>A	0.00158789	0.00132422	0.0014873	0.00161328	0.00134766		0.00157129	0.00162402	0.00162305	0.00172266	0.00153125	0.00151172	0.00198047	0.00178906	0.00178711	0.00161523	0.00178125	0.00122656	0.00139063	0.00159766	0.00180859
VP1	2841	A	G	120	I>V				0.00102734						0.00111621	0.00101172		0.00116406	0.00130469	0.0011875	0.00107812
VP1	2842	T	C	120	I>T													0.00180469
VP1	2844	A	G	121	T>A										0.00103516				0.00117969
VP1	2849	T	C	122	synonymous>S								0.00110938	0.00157031	0.00167773	0.00152344	0.00120312	0.00332031	0.00172461	0.00223047	0.00102148
VP1	2850	A	G	123	T>A													0.00116016
VP1	2852	T	A	123	synonymous>T													0.00145313
VP1	2852	T	C	123	synonymous>T			0.00117969	0.00116211				0.00156055	0.0015918	0.00191211	0.00154395		0.00237109	0.00221094	0.00189844	0.00212305	0.00102344		0.00116406
VP1	2854	A	G	124	Q>R													0.0017168
VP1	2855	A	G	124	synonymous>Q							0.00125391	0.00119141	0.00110938	0.00124609	0.00132422		0.00117383	0.00145313	0.00146875	0.00116406
VP1	2857	A	G	125	Q>R										0.00103516
VP1	2859	C	G	126	P>A				0.00104883
VP1	2860	C	T	126	P>L																				0.00101758
VP1	2861	C	A	126	synonymous>P													0.00166797
VP1	2861	C	T	126	synonymous>P	0.00467187	0.00433203	0.00246875	0.00245703	0.00466406	0.00372656	0.00419727	0.00206055	0.00277734	0.00186523	0.00307031	0.0049375	0.00380273	0.00228125	0.00387891	0.00255273	0.0055625	0.00520313	0.00453125	0.00590625	0.00450391
VP1	2862	T	C	127	S>P	0.00178516	0.00229687	0.00231445	0.00229883	0.00235156	0.00245313	0.00293359	0.00251367	0.00186719	0.00238867	0.00247461	0.00248828	0.00291797	0.00275	0.0028125	0.00261719	0.0024375	0.00265234	0.00248437	0.00239062	0.0025
VP1	2863	C	A	127	S>*	0.0180715	0.00560937	0.0176604	0.0167455	0.0150905	0.00904687	0.00571875	0.0116057	0.0131836	0.00769141	0.00705469	0.0154297	0.00771875	0.00676953	0.00694922	0.0104955	0.012058	0.0110506	0.0118318	0.0223684	0.0179687
VP1	2863	C	T	127	S>L	0.00316406	0.00266797	0.00169141	0.00158008	0.00607812	0.00489062	0.00164258	0.00154492	0.00242969	0.00130176	0.00207031	0.00434375	0.00228516	0.00137891	0.00309375	0.00163477	0.00628906	0.00408203	0.00304687	0.0048125	0.0036875
VP1	2864	A	C	127	synonymous>S									0.00155469								0.00510156		0.00134766	0.00148437
VP1	2864	A	G	127	synonymous>S	0.0157278	0.00545313	0.0165604	0.0167249	0.0130243	0.00801563	0.0050625	0.0112819	0.010375	0.00773438	0.00812109	0.0155428	0.0080625	0.00729688	0.00739062	0.0105313	0.00917969	0.0107969	0.0107578	0.020991	0.016653
VP1	2865	A	C	128	T>P													0.0019707				0.00112109
VP1	2865	A	G	128	T>A					0.00678906		0.00148437	0.001375		0.00142578	0.00129199	0.00142969	0.00351953	0.00104297	0.00206641	0.0010625		0.00117188	0.00107617		0.00115625
VP1	2866	C	A	128	T>N													0.00164062
VP1	2866	C	T	128	T>I	0.0112266	0.003	0.0105156	0.0103867	0.00670312	0.00304297	0.00239062	0.00655078	0.01	0.00520313	0.00419141	0.00995313	0.00485937	0.00433594	0.00427344	0.00592188	0.00880469	0.00726563	0.00760937	0.0151727	0.0111953
VP1	2867	C	A	128	synonymous>T									0.00129492						0.00124609		0.003375		0.00110938	0.00106055
VP1	2868	A	G	129	T>A	0.00717187	0.00242188	0.00769922	0.00780469	0.0045625	0.00320312	0.00250781	0.00506641	0.00716016	0.00436719	0.00368359	0.007625	0.00430078	0.00463672	0.00442578	0.00489062	0.00477344	0.00563672	0.00535937	0.0101406	0.00807813
VP1	2869	C	G	129	T>R									0.00171094
VP1	2870	A	G	129	synonymous>T	0.00239062		0.0024375	0.00240625	0.00108594		0.00335156	0.00249219	0.00171875	0.00195312	0.00209375	0.0028125	0.0019375	0.002375	0.00264062	0.00148437		0.00178125	0.00128125	0.00101562
VP1	2872	A	G	130	Q>R		0.00170312				0.00114062		0.00121875	0.00177344			0.00171875	0.00186719	0.00132813	0.00185938	0.001375		0.00119531	0.001375	0.00166406	0.00140625
VP1	2873	G	A	130	synonymous>Q					0.00153125							0.00101562	0.00376562
VP1	2874	A	G	131	N>D		0.00140625				0.00109375		0.0021875	0.00245313	0.0015625	0.00136719			0.00157031	0.00125781	0.00111719		0.00221875		0.00153125	0.00135156
VP1	2875	A	G	131	N>S		0.0010625	0.00285937	0.00195312	0.00132031	0.0014375	0.00109375	0.00261719	0.00126563	0.002375	0.00194531	0.0011875	0.00210156	0.00192188	0.0024375	0.00190625		0.00132031	0.003125	0.00109375
VP1	2878	A	G	132	Q>R													0.00114062	0.00107812						0.0015
VP1	2879	A	G	132	synonymous>Q		0.0011875		0.00130469	0.00178125		0.0010625	0.00164062	0.00184375	0.00104297	0.00183594	0.0015625	0.00429688	0.00139844	0.00144531	0.00189844	0.0019375		0.00135937	0.00176562
VP1	2881	A	G	133	D>G		0.00128125		0.00130469	0.00126563	0.00109375	0.00139063	0.00207813	0.00173438	0.00139063	0.00133984	0.00326563	0.0036875	0.00220313	0.00114062	0.00179688	0.00132031	0.00160938	0.0015	0.00130469
VP1	2882	T	C	133	synonymous>D		0.00190625		0.00228906	0.00115625	0.00172656	0.00189844	0.00110156	0.00107031	0.00125781	0.00132031	0.00185156	0.00142187	0.00205469	0.001375	0.00121875	0.00170312	0.00178906	0.00200781	0.00114062	0.00178906
VP1	2883	G	A	134	A>T							0.00104688			0.00107422		0.00146875		0.00173438	0.00210938
VP1	2885	A	G	134	synonymous>A	0.0011875	0.00151563		0.00167188		0.00215625	0.00150781	0.00246094	0.00203125	0.00215625	0.00245313	0.00196875	0.00275781	0.0048125	0.00161719	0.001875	0.0026875		0.00105469	0.00184375	0.00240625
VP1	2886	C	T	135	Q>*													0.00182812
VP1	2887	A	G	135	Q>R					0.00121094			0.00170312	0.00139063	0.00215625	0.00104688	0.00251562	0.00292188	0.00234375	0.00159375	0.002125		0.00134375	0.00192188	0.00204687
VP1	2888	G	A	135	synonymous>Q							0.00251562					0.00248437		0.00185938				0.00117969
VP1	2889	A	G	136	I>V				0.00114062	0.00125		0.00122266	0.00178125	0.00214844	0.00182812	0.00100781	0.0019375	0.003375	0.0021875	0.0412829	0.00167188	0.00117188	0.0025625	0.00136719	0.00149219
VP1	2889	A	T	136	I>F								0.0014375	0.00114062	0.001375
VP1	2890	T	C	136	I>T			0.00220313	0.00157813	0.00128906	0.00222656	0.00152344	0.0025	0.0024375	0.00159375	0.0025625	0.00271875	0.00529687	0.00271094	0.00301563	0.00182812		0.00121094	0.00294531	0.00176562	0.003375
VP1	2891	C	T	136	synonymous>I													0.00171875	0.00159375
VP1	2892	C	T	137	synonymous>L													0.00284375				0.00125	0.00203125
VP1	2893	T	C	137	L>P	0.00100781	0.00396875	0.0019375	0.00275	0.00220313	0.00301563	0.00148828	0.00296875	0.00153125	0.00186719	0.00338281	0.00532812	0.00410938	0.00429688	0.0018125	0.00221875	0.00260937	0.00279688	0.00283594	0.00271875	0.00178125
VP1	2894	A	G	137	synonymous>L		0.00129687						0.00136719	0.00158594						0.0011875	0.00117969		0.00144531		0.00110938
VP1	2895	A	G	138	T>A		0.00110938	0.00111719		0.00122656	0.00121094	0.00114062	0.00223438		0.00122266	0.00120312	0.001625	0.00189062	0.00147656	0.00127344	0.00103906		0.001125		0.00151563	0.00114062
VP1	2895	A	T	138	T>S													0.00370313
VP1	2896	C	T	138	T>I													0.00239062
VP1	2897	A	G	138	synonymous>T	0.00115625	0.00358594	0.0130962	0.0385691	0.0463405	0.0398026	0.0296669	0.0368421	0.0333059	0.0261924	0.0197368	0.0163651	0.00515625	0.0136102	0.0124589	0.00342187	0.00326563	0.0020625	0.0021875	0.00296875	0.0019375
VP1	2899	A	G	139	H>R		0.001125	0.00167188	0.00157813	0.00142187	0.00109375	0.00128125	0.0015	0.00103125	0.00196875	0.00132813	0.00125	0.00170312	0.0024375	0.00178125	0.00122656	0.00173438			0.00132813	0.00160938
VP1	2902	A	G	140	Q>R								0.00103125	0.00173438			0.00121094	0.00141406						0.00135156		0.00151563
VP1	2903	A	G	140	synonymous>Q								0.00113281				0.00185938	0.00189844
VP1	2904	A	G	141	I>V							0.00109375	0.00110938				0.0016875		0.00120312				0.00109375			0.00171094
VP1	2905	T	C	141	I>T												0.00107031
VP1	2906	T	A	141	synonymous>I													0.00278125
VP1	2906	T	C	141	synonymous>I						0.003625			0.00108594	0.00146094	0.00157422	0.00159375		0.00347656	0.00153125					0.00110156	0.00173438
VP1	2907	A	G	142	M>V												0.00101562
VP1	2908	T	C	142	M>T				0.00151563				0.00110938					0.00124219			0.00104688			0.00122656	0.00103125
VP1	2909	G	A	142	M>I																		0.00104688
VP1	2910	T	C	143	Y>H		0.00169531						0.0014375	0.00110156		0.00101172			0.0015625			0.0013125	0.00100781	0.00125	0.00119531	0.00103125
VP1	2911	A	G	143	Y>C																			0.00105469
VP1	2912	T	C	143	synonymous>Y		0.00309375		0.00225	0.0016875	0.00257813	0.00155469	0.00320312	0.00259375	0.0026875	0.00336719	0.007125	0.0029375	0.00496875	0.0025	0.00222656	0.0030625	0.00314063	0.004	0.00176562	0.003
VP1	2913	G	A	144	V>I												0.00146875	0.0056875					0.00160938
VP1	2914	T	C	144	V>A		0.00109375		0.00103125	0.00103125		0.001375	0.00180469	0.00116406	0.00128906	0.00178906			0.00157813	0.00128125	0.0015	0.00157031		0.002125	0.001375	0.001625
VP1	2915	A	G	144	synonymous>V		0.00122266	0.00157813	0.00291406	0.00390625	0.00310156	0.00266406	0.0039375	0.0045625	0.00358594	0.00313281	0.00196875		0.00460937	0.00421875	0.0030625	0.00198438	0.003375	0.0014375	0.00108594
VP1	2918	A	G	145	synonymous>P	0.00128906			0.0015625		0.001125	0.00124609	0.00125	0.00121875	0.00134375	0.00126563		0.00140625	0.00175781	0.00121875	0.00121875		0.00129687	0.0013125		0.002
VP1	2921	A	G	146	synonymous>P		0.00138281	0.00114062	0.00155469		0.00152344			0.00185938	0.00103125	0.00153125	0.00188281	0.00476563	0.00229687	0.00171094	0.00103125	0.00125781	0.00132813	0.00135156	0.00149219
VP1	2922	G	A	147	G>S							0.002125
VP1	2924	T	C	147	synonymous>G	0.00204687		0.00225781	0.0013125	0.00146094	0.00209375	0.00111328	0.00248437	0.00184375	0.00185938	0.00296875	0.00409375	0.00196875	0.00195312	0.002375	0.00207031	0.00178125	0.00192188	0.00245313	0.00140625	0.001875
VP1	2927	A	G	148	synonymous>G	0.00101562	0.00160938	0.00110156	0.00164062	0.00229687	0.001125	0.00205078	0.0021875	0.00232813	0.002625	0.00213281	0.00215625	0.00267969	0.0030625	0.00250781	0.00205469	0.00145313	0.00132031	0.002375	0.00185938	0.00170312
VP1	2930	T	C	149	synonymous>P		0.00230469	0.00303125	0.00296875		0.0020625	0.00210938	0.003125	0.00201562	0.0020625	0.00214062	0.003875	0.00567969	0.00353125	0.00164062	0.00272656	0.00210156	0.0024375	0.00178125	0.00219531	0.0030625
VP1	2931	G	A	150	V>I		0.00110938		0.0011875						0.00110547	0.00159375	0.00292969	0.00478125	0.00378125	0.00671875	0.00123438	0.0045	0.0107113	0.00974507	0.00682813	0.00890625
VP1	2932	T	C	150	V>A		0.00120703	0.00129687	0.00109375	0.00119531	0.00110547		0.00105859	0.00186719		0.00101562	0.00148437	0.00160938	0.00150781	0.00140234	0.00195312	0.0015	0.00148437	0.00176562	0.00120312	0.0031875
VP1	2933	A	G	150	synonymous>V		0.00117188	0.00182812	0.00164062	0.00250781	0.001125	0.00221094	0.00320312	0.00245313	0.00242969	0.0021875	0.00171875	0.00390625	0.00171094	0.003125	0.00164844	0.00115625	0.00154687	0.00152344	0.0016875	0.00135937
VP1	2936	A	G	151	synonymous>P		0.00126563		0.00110547		0.00133594	0.00139844	0.00109375	0.00107812	0.00107422	0.00128125	0.00234375	0.00309375	0.00246094	0.00153906		0.00121875	0.00270312	0.00123438	0.00164844	0.00221875
VP1	2937	G	A	152	D>N													0.00442969
VP1	2938	A	G	152	D>G			0.00148828	0.00110547				0.001625		0.00116797	0.00113281		0.00284375	0.00149219	0.00220313	0.00151563	0.00154687	0.00117969	0.00140625		0.00127344
VP1	2939	T	C	152	synonymous>D					0.00104688			0.00103125	0.00146094	0.001875	0.00186719	0.002375	0.00146484	0.00138672	0.0023125			0.00152344	0.00169531		0.0013125
VP1	2940	A	G	153	K>E						0.00101953			0.00125	0.001125		0.00120312
VP1	2941	A	G	153	K>R													0.00345313
VP1	2941	A	T	153	K>I													0.00284375
VP1	2942	A	G	153	synonymous>K		0.00123438	0.00309375	0.00151953		0.00113281	0.00167969	0.00189453	0.00276563	0.00183203	0.00171875	0.00220313	0.00183594	0.00279688	0.00185938	0.00304687	0.00216406	0.0025625	0.0020625	0.00202344	0.00167188
VP1	2943	G	A	154	V>I													0.003
VP1	2944	T	C	154	V>A					0.00123438	0.00126563		0.0010625	0.00164062	0.00110547	0.00113281	0.00180469	0.00120312	0.00107031	0.00103125	0.00119922		0.00141406	0.00111719	0.00114062
VP1	2945	T	C	154	synonymous>V		0.00178125	0.0018125	0.00127344			0.00189062	0.0025625	0.00203125	0.00259375	0.00257031	0.00284375	0.00227344	0.00361719	0.00170703	0.00196875	0.00221875	0.00178125	0.00146875	0.00167188	0.0016875
VP1	2947	A	G	155	D>G			0.00113281	0.00136328	0.00125	0.0013125	0.00100781	0.00221094	0.00127344	0.00180078	0.00157813	0.00146875		0.0014375	0.00175	0.00119531	0.00179688		0.00109375	0.00111719	0.00199219
VP1	2948	T	C	155	synonymous>D		0.00116797	0.00129297	0.00110938	0.00185156			0.00167969	0.00139063	0.00162109	0.00171875	0.00195312	0.00114453	0.00214062	0.0031875	0.00314063	0.0034375	0.00325	0.00259375	0.00177344	0.00210156
VP1	2949	T	C	156	S>P		0.00173438	0.00104688	0.00202344	0.00205469	0.00118359	0.00151563	0.00151563		0.00110938	0.0021875	0.00296875	0.00228125	0.00272656	0.00184375	0.00208594	0.00179688	0.00232813	0.00178125	0.003	0.00165625
VP1	2951	A	G	156	synonymous>S	0.00105469			0.00135937				0.00141406	0.00140625	0.00159375	0.00140625	0.00271875	0.00133594	0.0023125	0.00235156	0.00125	0.00103906	0.0018125		0.00226562	0.00140625
VP1	2951	A	T	156	synonymous>S																		0.00203125	0.00227344	0.00230469	0.00264062
VP1	2952	T	C	157	Y>H								0.00100391	0.00103906				0.00171484	0.00120312		0.00121094					0.00127344
VP1	2953	A	G	157	Y>C	0.00128906			0.0010625					0.00102344	0.00138281		0.00104688	0.00107422	0.00141797	0.00111719		0.00171875	0.00102344	0.00134375	0.00110938
VP1	2954	C	T	157	synonymous>Y								0.00123438	0.00184375	0.00191797	0.00148437	0.00253125	0.00208594	0.00311719	0.00142969	0.00115625	0.00115625	0.00195312	0.00120312	0.00126172
VP1	2955	G	A	158	V>M												0.00136719
VP1	2956	T	C	158	V>A		0.00114062	0.0018125	0.00145313	0.00148437	0.00114062	0.00145313	0.00182031	0.001375	0.00197656	0.00171875	0.00260937	0.00360156	0.00275	0.00201562	0.00209375	0.00136719	0.00253125	0.00144141	0.00203125	0.00265625
VP1	2957	G	A	158	synonymous>V												0.0016875
VP1	2958	T	C	159	W>R		0.001375	0.00251562	0.00191406	0.00184375	0.00108594	0.0014375	0.00223828	0.00150781	0.00199219	0.00162109	0.00278906	0.00355469	0.00149609	0.00219531	0.0018125	0.00316406	0.00123438	0.002	0.00153125	0.00107812
VP1	2960	G	A	159	W>*													0.001125					0.00157031			0.00120312
VP1	2962	A	G	160	Q>R			0.00109766			0.00102344	0.00108203	0.00151953		0.0013125	0.00132813	0.00129687	0.00150781	0.00209375	0.00185938	0.00228125	0.00134375		0.00167188	0.00146875	0.00185156
VP1	2963	A	G	160	synonymous>Q					0.00185938			0.00150781	0.00135156	0.00109375	0.00126172	0.002125	0.00153125	0.00120312	0.00196875			0.00154687	0.00121875		0.00121875
VP1	2964	A	G	161	T>A			0.00142187	0.00166406	0.00142969	0.00139063		0.00158594	0.00157813	0.00165625	0.00117188		0.00160938	0.00152734	0.0015625	0.00164844		0.00158594	0.00109375		0.00125
VP1	2966	A	G	161	synonymous>T				0.00175781				0.00132813	0.00116016	0.001875	0.0016875	0.00170312		0.00196875	0.0011875	0.00114844	0.00110938	0.00217187	0.00135156		0.00120312
VP1	2967	T	A	162	S>T													0.00223438
VP1	2967	T	C	162	S>P												0.0014375	0.00130469			0.00117188	0.00125	0.00129687	0.00114062	0.00122656	0.00140625
VP1	2968	C	T	162	S>F															0.001125
VP1	2969	T	C	162	synonymous>S		0.00173438	0.00133984	0.00107812	0.00203906	0.00296875	0.00242969	0.00195703	0.00254688	0.00235156	0.00267188	0.0034375		0.0028125	0.00385156		0.00248437	0.00221875	0.00123438	0.00167969	0.00121875
VP1	2970	A	G	163	T>A														0.00107422				0.00103125
VP1	2971	C	G	163	T>R														0.00100391
VP1	2972	G	A	163	synonymous>T			0.00153516												0.00157031					0.00129687
VP1	2972	G	C	163	synonymous>T															0.00105859
VP1	2973	A	G	164	N>D			0.00125391	0.00122656			0.00108984	0.00145313		0.00151563	0.00120703	0.00220313	0.00192188	0.00175	0.001625	0.00203125	0.0011875	0.001625	0.00153125	0.00125781
VP1	2974	A	G	164	N>S				0.00148437							0.00113281	0.00110156	0.00214453	0.00135937	0.0015625	0.00123438	0.00175	0.00103906	0.00121875	0.0016875	0.00110938
VP1	2975	T	C	164	synonymous>N		0.00142969	0.00130859	0.00155469	0.00203906	0.00176562	0.0025625	0.00582812	0.00678125	0.00875	0.0110403	0.0116776	0.0119449	0.00689063	0.00259375	0.00148437	0.00121875	0.00204687	0.00176562	0.00105078	0.00195312
VP1	2978	C	T	165	synonymous>P											0.00139063	0.00215625	0.00442187
VP1	2979	A	G	166	S>G		0.00147656		0.00135937				0.00122266	0.00116406		0.00138281	0.00113281	0.00209375	0.00167969	0.00103125	0.00145313	0.00125391	0.00144531	0.00151563		0.00130469
VP1	2980	G	A	166	S>N																		0.00110156
VP1	2981	T	C	166	synonymous>S	0.00109375	0.00123047	0.00195312	0.00184375	0.00223438	0.00170312	0.00202344	0.00245313	0.00175781	0.00264844	0.00240234	0.002625	0.00267188	0.00296875	0.00232031	0.0015625	0.00175	0.00240625	0.00228906	0.00222266	0.00146094
VP1	2983	T	C	167	V>A		0.00123438	0.00157031	0.00107031			0.00101172	0.00119531		0.00136719	0.00117969	0.00144531	0.00174219	0.00167188	0.00126172	0.00190625	0.0018125	0.00124609	0.00194531	0.00151563	0.00223438
VP1	2985	T	C	168	F>L		0.00170312	0.00139063	0.00213672	0.001375	0.00150781	0.00178125	0.0024375	0.00174219	0.00173828	0.00219141	0.00235937	0.00234375	0.00234375	0.00194531	0.00263281	0.00211719	0.00150781	0.00201562	0.00194531	0.002375
VP1	2986	T	C	168	F>S												0.00105859	0.001375			0.00102344	0.00111719		0.00139453
VP1	2987	T	C	168	synonymous>F				0.00167188	0.00123438	0.00115625		0.00193359	0.001625	0.00130078	0.00127734	0.00175	0.00273437		0.00164844	0.00108203	0.001875	0.00236719	0.00108984	0.00120703	0.00109766
VP1	2988	T	C	169	W>R																		0.00122656
VP1	2991	A	G	170	T>A	0.00188281	0.00164844	0.00104297	0.00217187	0.00171875	0.00165625	0.001875	0.00235156	0.0030625	0.00284375	0.00246094	0.0030625	0.00115234	0.00225781	0.00173438	0.00246094	0.00108594	0.00152344	0.00199219	0.00169531	0.00226562
VP1	2992	C	T	170	T>I													0.00179688		0.00223438		0.00160938	0.00396875	0.00464062	0.0079375	0.0115132
VP1	2993	C	T	170	synonymous>T			0.00111719	0.00175781				0.00146094	0.0011875	0.0014375	0.00170312	0.00479688	0.00141406	0.00235937	0.00135937		0.00141406	0.00273437	0.00186719	0.00103125	0.0013125
VP1	2995	A	G	171	E>G		0.00142969		0.00134375	0.00107812			0.00132031	0.00125		0.00148437	0.00223438	0.00215625	0.00254688	0.00172656	0.0011875	0.00142187	0.00248437	0.00171875	0.00149219	0.00167969
VP1	2996	G	A	171	synonymous>E														0.00102344
VP1	2999	A	G	172	synonymous>G	0.00130469	0.002	0.00228906	0.00225	0.00189062	0.00242969	0.00249609	0.00198047	0.00210938	0.00257422	0.00252734	0.00298437	0.00207813	0.00279688	0.00297656	0.00200781	0.00203125	0.00177344	0.00228125	0.002125	0.0018125
VP1	2999	A	T	172	synonymous>G																					0.00122656
VP1	3000	A	G	173	N>D			0.0011875	0.00143359			0.00134375	0.00133203	0.00120703	0.00122656	0.00142969	0.00110938	0.00235156	0.00154687	0.00170312	0.00116406	0.00101562	0.00154687	0.001625	0.00178906	0.00153125
VP1	3001	A	G	173	N>S	0.00140625	0.00223047	0.00232813	0.00189844	0.0015625	0.00164844	0.00179688	0.0024375	0.00236328	0.00232813	0.00211719	0.00198438	0.00204687	0.00198828	0.00209375	0.00314063	0.001375	0.00185938	0.0015	0.00160938	0.0011875
VP1	3002	C	T	173	synonymous>N							0.00142187	0.00107812	0.00142187	0.00144922	0.0030625	0.0031875	0.00114844	0.00261719	0.00166016		0.00121875
VP1	3005	C	T	174	synonymous>A															0.00154687			0.00114844
VP1	3008	G	A	175	synonymous>P						0.00147656		0.0014375	0.00207031	0.00171875	0.00151563	0.0023125			0.00503906		0.00126563	0.00235937	0.00114844	0.00156641	0.00101562
VP1	3011	G	A	176	synonymous>P											0.00101562	0.00167188		0.00109375	0.00161719			0.00123438
VP1	3013	G	A	177	R>H													0.00129297					0.00103125
VP1	3014	C	T	177	synonymous>R												0.00117969		0.00104297
VP1	3015	A	G	178	M>V												0.00138281	0.0010625	0.00107031				0.00152344	0.00115625		0.00129687
VP1	3016	T	C	178	M>T		0.00108203	0.00135937	0.00163672	0.00128906			0.00106641		0.00125391	0.00105078	0.00222656	0.00178906	0.00163672	0.00198828	0.00175	0.001625	0.00178125	0.00136719	0.00146875	0.00160938
VP1	3018	T	C	179	S>P	0.0013125	0.0016875	0.00108594	0.00148437	0.00188281	0.00176562	0.00130859	0.00224219	0.00225781	0.00178516	0.00213672	0.00276563	0.00265234	0.00217969	0.00239844	0.00260937	0.00199219	0.00178125	0.00195312	0.00230469	0.00346875
VP1	3019	C	T	179	S>F													0.00384375
VP1	3020	C	T	179	synonymous>S												0.00138281		0.00122656
VP1	3021	A	G	180	I>V		0.00242969	0.00112891	0.00228125	0.00123438	0.00105469		0.00163281	0.00120703	0.00153125	0.00214453	0.00484375	0.00359375	0.00284375	0.00201562	0.00142969	0.00226562	0.00260156	0.00214062	0.00151953	0.00186719
VP1	3022	T	C	180	I>T		0.00103125		0.00146094			0.00129687				0.00157422	0.00228906	0.00251953	0.00147656	0.00137891	0.00152734	0.00174219	0.00175	0.00117188	0.00154687	0.00133984
VP1	3023	A	G	180	I>M		0.00125781									0.00100391	0.00198438	0.00164844	0.0013125	0.00107812			0.00107031
VP1	3025	C	T	181	P>L													0.00102344
VP1	3026	G	A	181	synonymous>P														0.00103516
VP1	3027	T	C	182	F>L				0.00129297	0.00134375			0.00127344		0.00109766	0.00157813	0.00170312	0.00203125	0.00129687	0.001875	0.00263281	0.00164062		0.00132813	0.00126563	0.00221094
VP1	3028	T	C	182	F>S								0.00101758		0.00103906			0.00107031	0.00118359	0.00120312	0.00102344	0.00108594	0.00145313	0.00116406	0.00130859	0.00124219
VP1	3029	T	C	182	synonymous>F										0.00115625			0.004		0.00137109		0.00116406
VP1	3030	T	C	183	synonymous>L																					0.00104297
VP1	3030	T	G	183	L>V													0.00257031
VP1	3031	T	C	183	L>S																		0.00157031
VP1	3033	A	G	184	S>G	0.00132031	0.00255469	0.00157031	0.00241406	0.00257813	0.00208203	0.00196094	0.002375	0.00229687	0.00242188	0.00246094	0.00176562	0.00266016	0.00247656	0.00212109	0.00201562	0.00209375	0.00233594	0.00230078	0.00203906	0.00270312
VP1	3035	C	T	184	synonymous>S											0.00114453	0.00165625			0.00112891	0.00114844		0.00107812			0.00139063
VP1	3036	A	G	185	I>V		0.0015	0.0018125	0.00239062					0.0010625	0.00157422	0.00182422	0.00473438	0.00196094	0.00254688	0.00120312		0.00210156	0.00446094	0.00235156	0.00156641	0.00140625
VP1	3037	T	C	185	I>T		0.00171094		0.00157813				0.00176562		0.00108008	0.00185156	0.00303906	0.00615625	0.00301563			0.00140625	0.00330469	0.00135547	0.00140625	0.00151563
VP1	3038	T	C	185	synonymous>I		0.0024375	0.00150781	0.00149219			0.00137109	0.00211719	0.00146094	0.00213281	0.0036875	0.00454688	0.00316797	0.00392969	0.00171875	0.00221094	0.00144531	0.00242969	0.00175	0.00165625	0.00121875
VP1	3041	C	T	186	synonymous>G										0.00110156			0.00194531	0.00157422	0.00214844
VP1	3042	A	G	187	N>D		0.00109375	0.00108984	0.00108984	0.0011875	0.00100781		0.00122266	0.00153516	0.00123438	0.00135156	0.00180469	0.00158594	0.00139844	0.0011875	0.00141406	0.00151563	0.00153125	0.00157031	0.00104688	0.00121875
VP1	3043	A	G	187	N>S	0.00129687	0.00128906	0.00170703	0.00151563		0.00173828	0.00132813	0.00139063	0.00158203	0.00157813	0.00192188	0.00194531	0.00203125	0.00200391	0.00123828	0.00178125	0.00171875	0.00147656	0.00160938	0.00164062	0.00203125
VP1	3044	C	T	187	synonymous>N		0.00108984		0.00127344				0.00121875		0.00114453	0.0016875	0.00607812	0.00204297	0.00167188	0.00134375	0.00134375	0.00248437	0.00428906	0.00278906	0.00296094	0.00235937
VP1	3045	G	A	188	A>T																0.00117578
VP1	3047	C	T	188	synonymous>A			0.00115625				0.00132031			0.00115625		0.00285156		0.0015625	0.00144531			0.00128906
VP1	3048	T	C	189	Y>H		0.00108594								0.00100586	0.0013125	0.00121094	0.00105859	0.00142187			0.00201562	0.0014375	0.00117969	0.00150781	0.0015625
VP1	3049	A	G	189	Y>C								0.00114453				0.0013125	0.00113672	0.00103125							0.00101562
VP1	3050	T	C	189	synonymous>Y		0.00155859		0.00167578	0.00117188		0.00139844	0.00222656	0.00151563	0.00207031	0.00174219	0.00252344		0.00217187	0.0019375	0.00290234	0.00179688	0.00270312	0.00139063	0.00154687	0.00185938
VP1	3051	T	A	190	S>T	0.00141406			0.00140234
VP1	3051	T	C	190	S>P															0.00121094		0.00115625	0.0011875	0.00110938	0.00112891
VP1	3053	A	G	190	synonymous>S											0.0015	0.00191406					0.00201562	0.00108984	0.00177344		0.00172266
VP1	3054	A	G	191	N>D													0.00294922					0.00142187
VP1	3055	A	G	191	N>S								0.00127344				0.00183594						0.00110938
VP1	3056	T	C	191	synonymous>N								0.00110547		0.00137109		0.00159375		0.00200781	0.00153125	0.00235937	0.00265625	0.00350781	0.00295312	0.0024375	0.00234375
VP1	3057	T	C	192	F>L												0.00128516									0.00166406
VP1	3058	T	C	192	F>S				0.00104688														0.00114062
VP1	3059	C	T	192	synonymous>F				0.00328906	0.00217969		0.00210938	0.00197656	0.00139844	0.00185938	0.00162109	0.003		0.00173438
VP1	3060	T	C	193	Y>H	0.00114844	0.00176172	0.00110938	0.00142969		0.00153906		0.00134766	0.00154687	0.00149609	0.00137109	0.00246875	0.00248047	0.00251562	0.00174219	0.00103125	0.00104688	0.00263281	0.00199219	0.00123047
VP1	3062	T	C	193	synonymous>Y		0.00191406	0.00128125	0.00215625	0.00128906	0.00165625	0.00124219	0.00216016	0.00203125	0.00236328	0.00248828	0.00248437	0.00521875	0.00390625	0.0029375	0.00241406	0.00221094	0.00346875	0.00310938	0.00208203	0.00215625
VP1	3064	A	G	194	D>G	0.001625	0.00114844	0.00207813	0.00194531	0.00144531	0.00145703	0.00182812	0.00249219	0.00172656	0.00189844	0.00189844	0.0016875	0.00328125	0.00261328	0.00189062	0.00241406	0.00217187	0.002	0.00227734	0.00165625	0.00319531
VP1	3065	C	A	194	D>E			0.00126563
VP1	3065	C	T	194	synonymous>D												0.00182031	0.00325781	0.0016875	0.0010625				0.00105078
VP1	3068	A	G	195	synonymous>G	0.00171094	0.00185938	0.00182812	0.00222266	0.00121484	0.00275	0.00237891	0.00261719	0.0029375	0.002875	0.0036875	0.00385937	0.00192188	0.00244922	0.00339062	0.00225	0.00178906	0.00289063	0.00175781	0.00171094	0.00199219
VP1	3069	T	C	196	W>R					0.00109375				0.00125781						0.00108984	0.00106641	0.00121875	0.001125	0.00107812	0.0013125
VP1	3072	T	C	197	S>P	0.00101953	0.00218359	0.00178125	0.00191016	0.00174219	0.00207031	0.00216406	0.00228125	0.00189844	0.00242578	0.00220313	0.00246875	0.00181641	0.00239844	0.00242969	0.00164844	0.0024375	0.00257031	0.00204687	0.00201172	0.00242188
VP1	3074	T	C	197	synonymous>S		0.00146094	0.00139844	0.00148828	0.00142187	0.00183594	0.00160547	0.00198438	0.00185938	0.00196484	0.00202734	0.00340625	0.00271875	0.00310938	0.00336719	0.00246094	0.0016875	0.00269531	0.00138281	0.00236719	0.00345313
VP1	3076	A	G	198	E>G								0.00126953				0.00117188			0.00105469		0.00103125	0.00128125	0.00111719	0.00103516
VP1	3076	A	T	198	E>V													0.00274219
VP1	3077	A	G	198	synonymous>E									0.00113672	0.00130859	0.00105078			0.00102734				0.00110547	0.00103906		0.00107812
VP1	3080	T	C	199	synonymous>F		0.00116406						0.00128125		0.00174219		0.00197656	0.00260937	0.00116797	0.00210156	0.0016875	0.00213281	0.00189062	0.00121484	0.00120703	0.00158984
VP1	3081	T	A	200	S>T				0.00136719
VP1	3083	C	T	200	synonymous>S			0.001125			0.00195312					0.00135937	0.00323438	0.0119963	0.00183203			0.00101172	0.00115625
VP1	3084	A	G	201	R>G		0.00158984	0.00146094	0.0019375	0.00102344		0.00105859	0.00144141	0.00129297	0.00147266	0.00223047	0.00365625	0.00234766	0.00319141	0.00129297	0.00160156	0.00102734	0.00301563	0.00162891	0.00139844	0.001375
VP1	3086	G	A	201	synonymous>R												0.00120312	0.00150781	0.00150391
VP1	3087	A	G	202	N>D		0.00111719		0.00128125			0.00123438	0.00146875	0.00139063	0.00148437	0.00155469	0.00360156	0.00364062	0.00232422	0.00160156	0.00214062	0.00273437	0.0060625	0.00665625	0.006875	0.00785938
VP1	3088	A	G	202	N>S		0.00158984	0.00111719	0.00160938	0.00115234	0.0010625	0.00167578	0.00194531	0.0019375	0.00207031	0.00196484	0.00261719	0.00198438	0.00296875	0.00226562		0.00137109	0.00242188	0.00173438	0.00150781	0.0020625
VP1	3089	C	G	202	N>K			0.00105469
VP1	3089	C	T	202	synonymous>N		0.00125391	0.00166797	0.00183984	0.00111328	0.002125	0.0035625	0.0035	0.003375	0.00404688	0.00448047	0.00929276		0.00395312	0.0018125	0.00125781	0.00115625	0.00217969	0.00173438	0.00129687	0.00185938
VP1	3092	A	G	203	synonymous>G	0.00180469	0.002	0.0023125	0.00237891	0.00192969	0.00130469	0.001875	0.0025	0.00194922	0.00283594	0.00263672	0.00311719	0.00124219	0.00508594	0.00275	0.00239062	0.0025	0.002625	0.00198438	0.002625	0.0015625
VP1	3094	T	C	204	V>A								0.00107812	0.00116406	0.00116406			0.00125		0.00122656	0.00119531	0.00185938	0.00228125	0.00132813		0.00164062
VP1	3095	T	C	204	synonymous>V														0.00107812	0.00165625			0.00153516	0.00107031		0.00118359
VP1	3096	T	A	205	Y>N				0.00307812							0.00122656
VP1	3096	T	C	205	Y>H	0.00434375	0.013384	0.0385691	0.0455592	0.0128495	0.0216694	0.0253701	0.00632813	0.00545313	0.0151624	0.0331414	0.00578125	0.00383594	0.0200863	0.0194696	0.0379112	0.0206826	0.00267188	0.00434375	0.00307031	0.00453125
VP1	3096	T	G	205	Y>D			0.0019375		0.00322656										0.00145313
VP1	3097	A	G	205	Y>C	0.00241406	0.00425	0.0059375	0.0120477	0.0036875	0.0054375	0.00582031	0.00303906	0.00273437	0.00404297	0.0078125	0.00240625	0.002125	0.00432813	0.00396875	0.00728125	0.00714844	0.00238281	0.00253125	0.00261719	0.00238281
VP1	3098	C	G	205	Y>*					0.001125
VP1	3098	C	T	205	synonymous>Y									0.00185938	0.00125	0.00115039	0.00135937	0.00345313	0.00173828	0.00114062		0.00104688	0.0020625	0.00203125	0.00251562	0.0021875
VP1	3099	G	A	206	G>S		0.00101953										0.00114844
VP1	3101	C	T	206	synonymous>G			0.00121875		0.00172656			0.00132813	0.00149609	0.00140625	0.00174219	0.00203906	0.0108347	0.00288281	0.00214844	0.0048125	0.00435938	0.00507812	0.00223438	0.00245313	0.00159375
VP1	3102	A	G	207	I>V		0.00158594	0.00182031	0.00105859	0.0015	0.00110156	0.00212109	0.0029375	0.00289844	0.00384375	0.00297266	0.003125	0.00221094	0.00376562	0.0144737		0.00102344	0.00175		0.00121875	0.00152344
VP1	3103	T	C	207	I>T		0.00125	0.00132031				0.00174219	0.00158594	0.00107812	0.00136719	0.00123828	0.00125781	0.00116406		0.00217187	0.00124219	0.00173438	0.00129687	0.00118359	0.00176562	0.00167969
VP1	3104	C	T	207	synonymous>I																0.00191406	0.00110156
VP1	3105	A	G	208	N>D				0.00104297				0.001125	0.00104688				0.00146875		0.00104688		0.00127344	0.00155469	0.00126563
VP1	3106	A	G	208	N>S			0.00109766	0.00114062				0.00161328	0.00125781	0.00142578	0.00122266	0.00129687	0.00115625	0.00164062	0.00153906		0.00101953	0.00136719	0.00157813	0.00105469	0.00157031
VP1	3107	C	T	208	synonymous>N							0.0031875			0.00127344				0.00109766
VP1	3108	A	G	209	T>A				0.00118359	0.00107422			0.00140625	0.00107812	0.00147266	0.00124609	0.00182031	0.00163281	0.00135156	0.00151563	0.001375	0.00108203	0.00135937	0.00123438	0.00108594	0.00142969
VP1	3109	C	T	209	T>M																		0.00109375
VP1	3110	G	A	209	synonymous>T							0.00207813	0.00114062	0.00108594	0.00174219	0.00119141	0.00117188		0.0026875	0.00163281
VP1	3111	C	T	210	synonymous>L															0.00101562
VP1	3112	T	C	210	L>P			0.00104297	0.0010625	0.00104688			0.00125781		0.00129687	0.00107422	0.00182812	0.00168359	0.00147656	0.00110156	0.00153125	0.00117188	0.00145313	0.00121875	0.0018125	0.0019375
VP1	3113	A	G	210	synonymous>L		0.00108984		0.00165625				0.00160156	0.00141797	0.00155469	0.00167969	0.00217969	0.00328125	0.0019375	0.00162891	0.00151563		0.00153906	0.00103906	0.00111328	0.00171094
VP1	3113	A	T	210	synonymous>L																0.00111719
VP1	3114	A	G	211	N>D		0.00114844									0.00111133					0.00257813	0.00126563	0.00177344	0.00107812		0.00117188
VP1	3115	A	G	211	N>S		0.00157813	0.00194531	0.00172656	0.00110156		0.00164062	0.00183203	0.00178125	0.00224609	0.00148437	0.00196875	0.00223438	0.00158594	0.00178516	0.00142969	0.00202344	0.00191406	0.00175781	0.00163281	0.00153125
VP1	3116	C	T	211	synonymous>N										0.00102344	0.00101562		0.00172656	0.00121875		0.001375	0.00125781	0.00159375		0.00190625	0.00246875
VP1	3117	A	G	212	N>D												0.00103906	0.00120703	0.00109766	0.00108594			0.00170312		0.00104688
VP1	3118	A	G	212	N>S			0.00170312	0.00173828			0.00104297	0.00164844	0.00169531	0.00148437	0.001375	0.0019375	0.00183594	0.00145703	0.00184375	0.00167969	0.00146875	0.0021875	0.00150781	0.00134375	0.00214844
VP1	3119	C	T	212	synonymous>N								0.00156641		0.00123438	0.0026875	0.00390625		0.00344531	0.00111328			0.00267969	0.00120703	0.00145313
VP1	3120	A	C	213	M>L	0.00119531							0.00106641		0.00214062
VP1	3120	A	G	213	M>V	0.00141406	0.00203125	0.0016875	0.0015625		0.00167578	0.00109375	0.00179688	0.00134375	0.00132813	0.00182031	0.00296875	0.00298437	0.00228125	0.00205469	0.00151953	0.00167969	0.00196875	0.00112109	0.00121484	0.00159375
VP1	3121	T	C	213	M>T														0.00107812				0.00135937	0.00107812		0.00123438
VP1	3122	G	A	213	M>I					0.00177734
VP1	3123	G	A	214	G>S								0.00108594									0.00166406
VP1	3125	C	T	214	synonymous>G												0.00123438	0.00222266	0.00100781							0.00114844
VP1	3126	A	G	215	T>A												0.0013125	0.00260937		0.00126953		0.00120703
VP1	3128	G	A	215	synonymous>T									0.00108984	0.00107422		0.00120312		0.00177344
VP1	3129	C	T	216	synonymous>L							0.001125	0.00253906	0.00240625	0.00234375	0.00328906	0.0051875	0.00136719	0.00185938
VP1	3130	T	A	216	L>Q					0.00116797
VP1	3130	T	C	216	L>P		0.00128125		0.00117188			0.00183984	0.00108594	0.00102734	0.00103125	0.00137109	0.00264062	0.0019375	0.00185156		0.00111719		0.00135937	0.00147266	0.00114844	0.00151563
VP1	3131	A	G	216	synonymous>L		0.00117578	0.00159375	0.00121875	0.00152734		0.00135547	0.00209375	0.00199219	0.00177344	0.00240625	0.00473438	0.00125781	0.00421875	0.00185156	0.00129297	0.00198438	0.00403125	0.00309375	0.00278125	0.00385156
VP1	3132	T	C	217	Y>H														0.00129687			0.00104688	0.00144531	0.00110938	0.00101562
VP1	3133	A	G	217	Y>C		0.00128125	0.00104688	0.00101562			0.00150391	0.001125	0.00151953	0.00119531	0.00128906	0.00254688	0.00185547	0.00210938		0.00112109		0.00204687
VP1	3134	T	C	217	synonymous>Y		0.00175	0.00173438	0.00191406	0.00107422	0.00129687		0.00229687	0.00200781	0.00217187	0.00257031	0.00434375	0.0023125	0.00421875	0.0025625	0.00203125	0.00175781	0.00235156	0.00164844	0.00165234	0.00223438
VP1	3134	T	G	217	Y>*															0.0021875
VP1	3135	G	A	218	A>T															0.00145313
VP1	3136	C	T	218	A>V																	0.00135937
VP1	3137	A	G	218	synonymous>A				0.00126563						0.00120703	0.00100977	0.0011875	0.00103516	0.00170312			0.00123438	0.00395312	0.00198828	0.00137109	0.00323438
VP1	3138	A	G	219	R>G		0.00214844	0.00271094	0.00265625	0.00226562	0.00166406	0.00152344	0.00203906	0.002625	0.00241406	0.002625	0.00382813	0.00251562	0.00342187	0.00201562	0.00263281	0.0016875	0.00321094	0.00208203	0.00208594	0.00173438
VP1	3140	A	G	219	synonymous>R	0.0010625	0.00170312	0.00195312	0.00211328	0.00168359	0.00162109	0.00440625	0.00248828	0.00166406	0.00280469	0.00245313	0.00244531	0.00217187	0.00294141	0.00238281	0.00209375	0.00171875	0.00203125	0.00210938	0.0013125	0.0016875
VP1	3142	A	G	220	H>R				0.00157031	0.00174219	0.00151172		0.00150781	0.00127344	0.00146484	0.00110938	0.00125		0.00176562	0.00125		0.00125		0.00109375	0.00130078	0.00107031
VP1	3143	T	C	220	synonymous>H		0.00185156	0.00126172	0.00148047	0.00114062	0.00146094	0.00168359	0.00202344	0.00169531	0.00201172	0.00264453	0.00259375	0.0035	0.00210938	0.00248828	0.00228906	0.00138281	0.00261719	0.00165625	0.00191406	0.00191406
VP1	3145	T	C	221	V>A		0.00197266	0.00167578	0.00205469	0.00171875	0.00165625	0.00151563	0.00142187	0.00171875	0.0016875	0.00170312	0.002125	0.00246484	0.00245703	0.00188281	0.00135156	0.00242188	0.00120312	0.0020625	0.00238281	0.00146094
VP1	3146	C	T	221	synonymous>V														0.00127344	0.00135547	0.00179688	0.00228125	0.00177344	0.00260156	0.00155469	0.00144531
VP1	3147	A	G	222	N>D			0.00123438	0.00114062	0.00152344		0.00189844	0.00164453	0.00234375	0.00142969	0.00130078	0.002125	0.002625	0.00192188	0.00118359	0.00114062	0.00111719	0.00199219		0.00127344	0.00125
VP1	3148	A	G	222	N>S		0.00100781		0.00107031				0.00121094	0.00109375	0.00109766	0.00116797			0.00112891	0.00121094	0.00111719		0.00161719	0.00128906	0.00103906	0.00112891
VP1	3149	C	T	222	synonymous>N										0.00104297		0.00160938		0.00149219							0.00161719
VP1	3152	T	C	223	synonymous>A		0.00179688	0.00165625	0.0016875			0.00154687	0.00182031	0.00132813	0.00173047	0.00146484	0.0018125	0.00139844	0.00246875	0.00184375	0.00125391	0.00161719	0.00204687	0.00128125	0.00158984	0.00164062
VP1	3155	A	G	224	synonymous>G		0.00135156	0.00188281	0.00153125	0.00197656		0.00189453	0.00211719	0.00225	0.00201172	0.00206641	0.00313281	0.00315625	0.00228125	0.00203125	0.00145313	0.00207813	0.00260937	0.002375	0.00165625	0.00175
VP1	3156	A	G	225	S>G	0.00376562	0.00641406	0.0074375	0.00855469	0.00671875	0.0116365	0.0207237	0.0206826	0.0296258	0.0390214	0.0396998	0.0311678	0.0210526	0.0149054	0.0028125	0.00263281	0.00217187	0.00161719	0.00223438	0.00178125	0.00186719
VP1	3158	C	T	225	synonymous>S						0.0010625									0.00216406		0.0011875
VP1	3159	A	G	226	T>A							0.00167188	0.00117578	0.00142187	0.00150391	0.00134766	0.00199219	0.00134375	0.00132813	0.00119531	0.00121875	0.00120312	0.00135937	0.00115625
VP1	3161	G	A	226	synonymous>T														0.00114453	0.00166016	0.00104688		0.00110547
VP1	3164	T	C	227	synonymous>G		0.0021875	0.00177344	0.00221875	0.0034375	0.00292188	0.00301563	0.00375	0.00267969	0.00457813	0.00420312	0.00317187	0.0020625	0.00280859	0.00396875	0.00215625	0.0013125	0.0021875	0.00165625	0.00296094	0.00154687
VP1	3167	A	G	228	synonymous>P		0.00148828	0.00110156					0.00148437		0.00155078	0.00109375	0.00219531	0.001875	0.00152344			0.00136719	0.00166406		0.00102344	0.0015625
VP1	3168	A	G	229	I>V						0.00171875		0.0011875	0.00120703	0.00100781		0.0013125	0.00158594	0.00183594		0.00140625	0.0014375	0.00191406	0.00112109		0.00103125
VP1	3172	A	G	230	K>R								0.00121875		0.00117188		0.00128906	0.00191406	0.00107812	0.00122656		0.00105859	0.00132813	0.00125391
VP1	3173	A	G	230	synonymous>K		0.00114062	0.0018125	0.00161719			0.00101172	0.00333594	0.002	0.00171094	0.00185547	0.00178906	0.00142578	0.00160156	0.00196875			0.00114062	0.0011875	0.00103125	0.00146094
VP1	3174	A	G	231	S>G		0.00209375	0.00235156	0.00136719	0.00169531	0.0013125	0.00195312	0.00260156	0.00194141	0.00220313	0.002125	0.00174219	0.00375	0.00271875	0.00235937	0.00175781	0.00210156	0.00172656	0.00166797	0.00191016	0.00165625
VP1	3176	C	T	231	synonymous>S				0.0031875	0.00303906	0.00283594	0.00497656	0.0182977	0.0285567	0.0471628	0.0671464	0.0766036	0.0439145	0.0503906		0.00248437	0.00232031	0.00246875	0.00217187	0.00110156	0.00190625
VP1	3177	A	G	232	T>A	0.00396094	0.00723437	0.0127364	0.0125	0.0114206	0.0105366	0.0128701	0.0166735	0.0166735	0.0193668	0.0157278	0.0184211	0.018236	0.0105058	0.0122225	0.00192969	0.00101953	0.0015	0.00126953	0.0011875	0.00149219
VP1	3178	C	A	232	T>N		0.00153906	0.00121875		0.00101562	0.00199219		0.00128125			0.00127344	0.00300781	0.00521094	0.0024375
VP1	3178	C	T	232	T>I												0.00178906		0.001125
VP1	3179	C	T	232	synonymous>T								0.00101758		0.00135156	0.00160156	0.00453125	0.00553906	0.00271875				0.0014375		0.00110938
VP1	3180	A	G	233	I>V								0.0013125				0.00169531	0.00115625	0.00157031				0.00207031	0.00108203	0.00107812	0.0013125
VP1	3181	T	C	233	I>T							0.00107422	0.00178516	0.00128125	0.00133594	0.00124609	0.00146875	0.00191797	0.00200781	0.00159766	0.00142969	0.00135547	0.00260937	0.0010625		0.00121875
VP1	3182	T	C	233	synonymous>I	0.00108984								0.00395312	0.00171484	0.00146875	0.00225	0.00171875	0.00229687							0.002375
VP1	3183	A	C	234	synonymous>R									0.00329687												0.00139063
VP1	3183	A	G	234	R>G		0.00121094		0.00112109				0.00101172	0.00129687	0.00103906	0.00117578	0.00186719	0.00114844	0.00189844		0.00121484	0.00143359	0.0015625	0.00114844
VP1	3185	A	G	234	synonymous>R								0.00153125	0.00114062	0.00142578	0.00147656	0.00154687	0.00342187	0.0018125	0.00193359	0.00165625	0.00192969	0.00197656	0.00219141	0.0011875	0.0020625
VP1	3186	A	G	235	I>V		0.00149219	0.00269531	0.00300781		0.00305859	0.00102344	0.0035	0.00216797	0.00352344	0.00298437	0.00353125	0.00267188	0.00325781	0.00407031	0.00188281		0.00296094	0.00234375	0.00120312	0.00185938
VP1	3187	T	C	235	I>T		0.00112109	0.00126953	0.00139844	0.001125	0.00104688	0.00133203	0.00185938	0.00167578	0.0024375	0.00153125	0.00148437	0.00189844	0.0020625	0.00196875	0.00227344	0.00175	0.00246875	0.00171875	0.00198438	0.00241406
VP1	3188	C	T	235	synonymous>I								0.00130078			0.00107031	0.00192188		0.00114453	0.00119531			0.00139844
VP1	3189	T	C	236	Y>H		0.00146094	0.00111328	0.001125	0.001125				0.00126172	0.00145703	0.00107031	0.00164062	0.00211328	0.00157422	0.00121875	0.00100391		0.00189844	0.001125	0.00128906
VP1	3191	C	T	236	synonymous>Y												0.00126563	0.00179688
VP1	3192	T	C	237	F>L		0.00139063	0.00186328	0.00192188	0.00149219	0.00104688	0.00192188	0.00226562	0.00203125	0.00214453	0.00216797	0.00251562	0.00350781	0.00184375	0.002	0.00158594	0.00253125	0.00166406	0.00309375	0.00273437	0.00303125
VP1	3193	T	C	237	F>S				0.00106641										0.00133984		0.00123047		0.00124219	0.00107031		0.00120312
VP1	3194	C	T	237	synonymous>F									0.00132031		0.00142578	0.00250781				0.00112109		0.00105469	0.00105469	0.00110156
VP1	3195	A	G	238	K>E												0.00107031					0.00135156		0.00138281		0.00116406
VP1	3196	A	G	238	K>R																		0.0013125	0.00113672	0.00117188
VP1	3197	A	G	238	synonymous>K	0.00122266	0.00184375	0.00170312	0.00221875	0.00172656	0.00157031	0.00179688	0.00228125	0.00150781	0.00189844	0.00186328	0.0018125	0.00269531	0.00214062	0.00298437	0.00225	0.00165625	0.00186719	0.002125	0.00216406	0.00254688
VP1	3199	C	A	239	P>Q					0.003
VP1	3200	G	A	239	synonymous>P					0.00163281							0.00114062		0.00132422			0.00124219
VP1	3201	A	G	240	K>E		0.00116016	0.00410156	0.00689063		0.00201172	0.00248828	0.00266406	0.0013125	0.00330078	0.00266406	0.00123438	0.00308594	0.00232031		0.00111719	0.00345313	0.00359375	0.00453125		0.00153906
VP1	3202	A	G	240	K>R		0.00202344	0.00201562	0.00171875	0.00176562	0.00122656	0.00185938	0.00253906	0.0018125	0.00186328	0.00178125	0.00303906	0.00240625	0.00320312	0.00204687	0.00172656	0.00151953	0.00278125	0.0019375	0.00222266	0.00229687
VP1	3203	G	A	240	synonymous>K					0.00139063							0.00128125
VP1	3205	A	G	241	H>R		0.00182031		0.00132031	0.00132813			0.00142969	0.0011875	0.0011875	0.00184375	0.00471875	0.00271875	0.00245703	0.00145313	0.00134375	0.00110156	0.00192969	0.00155469	0.001875	0.00151563
VP1	3206	T	C	241	synonymous>H		0.00246094	0.0020625	0.00292969	0.00249219	0.00226953	0.0021875	0.00245703	0.00247656	0.00252344	0.00283203	0.00442187	0.00400781	0.00564063	0.00315625	0.0025	0.00292188	0.00253125	0.00205078	0.00205078	0.0030625
VP1	3207	G	A	242	V>I					0.00117969		0.00186328							0.00116797	0.00302344
VP1	3208	T	C	242	V>A			0.00165234	0.00166406	0.00165625	0.00107812	0.00147656	0.00215625	0.00151563	0.00263281	0.00142969	0.00234375	0.00271094	0.00219531	0.00249219	0.00195312	0.00282812	0.00211719	0.00195312	0.002375	0.00259375
VP1	3209	C	T	242	synonymous>V														0.00109375
VP1	3210	A	G	243	K>E			0.00100781	0.00100781	0.00112891		0.00107422	0.00127734	0.0014375	0.00162891	0.00132813	0.00246875	0.00221484	0.00171094	0.00182812	0.0010625	0.001125	0.00121875	0.00146094	0.00175781	0.00178125
VP1	3211	A	G	243	K>R												0.0015	0.00114844					0.00164062			0.00121875
VP1	3212	A	G	243	synonymous>K	0.00130469	0.00245313	0.00221094	0.00254688	0.00171875	0.001625	0.00246875	0.00322656	0.00283594	0.00272266	0.00355469	0.00425	0.00296875	0.00371875	0.00428125	0.00209375	0.00186719	0.00241406	0.00246875	0.00229687	0.00213281
VP1	3215	G	A	244	synonymous>A							0.0010625					0.00135937		0.00157813
VP1	3216	T	C	245	W>R									0.00103125			0.00119531	0.00134375		0.00114062		0.001125	0.00176562		0.00146875	0.00167969
VP1	3219	A	G	246	I>V				0.00133203			0.00111328	0.00108594	0.00132031	0.00183984	0.00104688	0.00185938	0.00149609	0.00159766	0.00167969		0.00111719		0.00134375	0.00100781	0.00161719
VP1	3220	T	C	246	I>T								0.00101953				0.00165625		0.00109375	0.00117969
VP1	3221	A	C	246	synonymous>I			0.00644531	0.0153783	0.0192434	0.0197574	0.0156764	0.0189762	0.0202714	0.0182771	0.0130345	0.010074	0.00739062	0.0153372	0.135012	0.00171875	0.00149219	0.001125	0.00123438	0.00176562	0.00128125
VP1	3221	A	G	246	I>M		0.001125	0.00125781		0.00164062		0.00134766	0.00197656	0.00238281	0.00403906	0.00611719	0.0106291	0.0185855	0.00646875	0.00141406	0.00103125			0.00128125	0.00101562	0.00146875
VP1	3224	T	C	247	synonymous>P				0.00141406			0.00110156	0.00134766	0.0015	0.00141406	0.00131641	0.00157031	0.00134375	0.00266406	0.00174609	0.00307031	0.00398437	0.00348438	0.00265625	0.00270312	0.00220313
VP1	3225	A	G	248	R>G				0.00124609			0.00113281	0.00114453	0.00116797			0.00144531	0.00182031	0.00199609	0.00121875	0.00133594	0.0015	0.00189062		0.00130859
VP1	3227	A	G	248	synonymous>R		0.0014375	0.00205469	0.00178906	0.00111328	0.0015625	0.00190625	0.00219141	0.00183594	0.00264844	0.00191406	0.00171094	0.0065	0.00275	0.00270312	0.00225	0.00141406	0.00133594	0.0018125	0.0020625	0.00197656
VP1	3230	A	G	249	synonymous>P			0.00170312	0.00139453			0.0014375	0.00152344	0.0011875	0.00112891	0.00137109	0.00203125	0.00260547	0.00147266	0.00152344		0.00196875		0.00134375		0.00153125
VP1	3231	C	T	250	P>S							0.00113281
VP1	3233	T	C	250	synonymous>P		0.00125781	0.00117188	0.00126172	0.00164062			0.00176953	0.00204687	0.00152344	0.00182812	0.00267188	0.0015	0.00167188	0.00395312	0.00254688	0.00169531	0.0024375	0.00142187	0.00164062	0.00208594
VP1	3234	A	G	251	R>G											0.00106445	0.00142187	0.00132031				0.00132813				0.00171875
VP1	3236	A	G	251	synonymous>R		0.00138281		0.00114062	0.00134375		0.00126953	0.00171094	0.00177344	0.002125	0.00142187	0.00115625		0.00152344	0.00258594	0.00133594	0.00167969	0.00159375	0.00118359	0.00107812	0.00201562
VP1	3238	T	C	252	L>P		0.00150781	0.00178125	0.00132813	0.00106641	0.00111719	0.00117969	0.00179688	0.00113281	0.00171484	0.00204687	0.0025625	0.00221094	0.0016875	0.00154297	0.00267969	0.001875	0.00197656	0.0015625	0.00120312	0.00165625
VP1	3239	C	A	252	synonymous>L												0.00125
VP1	3239	C	T	252	synonymous>L		0.001125										0.00328125
VP1	3240	T	C	253	C>R		0.00141406	0.00116016	0.00135156	0.00144531		0.00100781	0.00137109	0.00110938	0.00160156	0.00205078	0.003125	0.00234375	0.00191406	0.00185938	0.00232813	0.00189062	0.00185938	0.00152734	0.00225	0.00185156
VP1	3241	G	A	253	C>Y																		0.00123438
VP1	3244	A	G	254	Q>R		0.00147656		0.00119922			0.00103125	0.00120312	0.00148437		0.00134375	0.00263281	0.00190625	0.00215625	0.00189062		0.00116797	0.00209375	0.00123438	0.00114844	0.00153125
VP1	3244	A	T	254	Q>L							0.0015625
VP1	3245	A	G	254	synonymous>Q					0.00103125			0.00124219		0.00107031	0.00157031	0.00326563	0.00162891	0.00253906	0.00202734			0.00224219		0.00120312	0.00103906
VP1	3246	T	C	255	Y>H	0.0129934	0.0175164	0.0282689	0.0232319	0.00207813	0.00375	0.00166016	0.0460732	0.0333059	0.0594984	0.0238281	0.00179688	0.00246875	0.00160156	0.00203906	0.00245313	0.0158717	0.0151521	0.0168791	0.00170312	0.00473438
VP1	3247	A	C	255	Y>S	0.00114062	0.00121094	0.00182031	0.00155078				0.00367187	0.00264062	0.00427344	0.00168359						0.00102344		0.001375
VP1	3247	A	G	255	Y>C												0.00155469						0.00115234			0.00121875
VP1	3248	C	T	255	synonymous>Y		0.00123828	0.00173438				0.00209375	0.002125	0.00165625	0.00222656	0.00299219	0.0059375		0.00353125	0.00298437	0.00250781	0.00528125	0.0194901	0.0223067	0.0317023	0.0310033
VP1	3250	A	G	256	E>G		0.00120703	0.00146875	0.00189844	0.0014375		0.001625	0.00162109	0.00148437	0.00148437	0.00202344	0.00217187	0.00260156	0.00178125	0.00203125	0.00113281		0.00219531	0.00188672	0.00149219	0.00120312
VP1	3252	A	G	257	K>E		0.00183594		0.00175781	0.001375		0.00128516	0.00192188	0.00119531	0.00235937	0.00159766	0.00365625	0.0025	0.00196875	0.00142187	0.00178125	0.00120312	0.00217969	0.00173047	0.00159375	0.001375
VP1	3253	A	G	257	K>R		0.00180078	0.00137891	0.00159375	0.00132031	0.00123438	0.00221875	0.00244922	0.00203125	0.0034375	0.00239062	0.00476563	0.00338281	0.00803125	0.014926	0.00450781	0.00598437	0.00357813	0.00269531	0.00266016	0.002625
VP1	3255	G	A	258	A>T							0.0010625	0.00107812	0.00184375	0.002625	0.00301172	0.00201562	0.00603125	0.00449219	0.0046875
VP1	3257	A	G	258	synonymous>A		0.00133594		0.00115625			0.00126563	0.00131641	0.00190625	0.00173438	0.00157813	0.00319531	0.00639844	0.0026875	0.00179688	0.0013125	0.00170312	0.00185938	0.00189062	0.00141016	0.00178906
VP1	3258	A	C	259	K>Q															0.00317187
VP1	3258	A	G	259	K>E		0.00115625		0.00100781	0.00103125			0.00184375	0.00108984	0.00126563	0.0011582	0.002375	0.00201562	0.00157422		0.00141406	0.00129687	0.00195312	0.00139063	0.00127344	0.00145313
VP1	3259	A	G	259	K>R	0.00132031	0.00398437	0.00285156	0.00291406	0.00315625	0.00178906	0.0044375	0.00415625	0.00410938	0.00464844	0.004	0.0053125	0.00839063	0.00508594	0.00814063	0.00214062	0.001875	0.00252344	0.00148437	0.00182812	0.00188281
VP1	3260	G	A	259	synonymous>K							0.0015625
VP1	3261	A	G	260	N>D								0.00142578		0.00120703			0.00110156	0.00117188	0.00116406	0.00103125		0.00151563	0.00144141
VP1	3262	A	G	260	N>S		0.00135937	0.00162109	0.00177734	0.00115625		0.00107031	0.0020625	0.00176562	0.00173438	0.00173828	0.00119531	0.00189453	0.001875	0.00185938	0.00175	0.00138281	0.00201562	0.00197656	0.00192188	0.002375
VP1	3263	C	T	260	synonymous>N		0.00133203					0.00115234			0.00112109	0.00120312	0.002		0.0014375	0.00159375	0.00129687
VP1	3265	T	C	261	V>A		0.00123828	0.00114062	0.00142187			0.00133203	0.00198438	0.00163281	0.00142578	0.00147656	0.00241406	0.00150781	0.00169141	0.00225781	0.00147266	0.00229687	0.00207813	0.00150781	0.00207031	0.002125
VP1	3266	G	A	261	synonymous>V						0.00101172
VP1	3267	A	G	262	N>D				0.00117188			0.00111719	0.00177734	0.00134766	0.00136719	0.00124219		0.00182031	0.00153906	0.00132422	0.00115234	0.00121875	0.00122656	0.00124219		0.00146875
VP1	3268	A	G	262	N>S										0.00111328		0.00150781	0.00382813	0.00124219		0.00107031	0.00103516	0.00185938	0.00101172		0.00127344
VP1	3269	C	T	262	synonymous>N											0.00190234	0.00246094	0.00160156	0.002625
VP1	3270	T	C	263	F>L		0.00164062	0.00147656	0.00152344	0.00164844	0.00126563	0.00136719	0.00225	0.00140234	0.0019375	0.00214844	0.00151563	0.00182812	0.00240625	0.00221875	0.00234375	0.00303906	0.00371875	0.00184766	0.00161719	0.00197656
VP1	3271	T	C	263	F>S												0.00104688	0.00102734					0.00116406	0.00146875	0.00114062
VP1	3274	A	G	264	Q>R	0.00285937	0.00241406	0.00146875	0.00139063	0.00214844			0.00113672	0.00124219	0.00150781	0.00139063	0.00146094	0.00117578	0.00115234	0.002375		0.00117188	0.00142969	0.00139063	0.00116406	0.00140625
VP1	3275	A	G	264	synonymous>Q		0.00122656			0.00100781		0.00100391	0.00100391	0.00121875	0.00139844	0.00144531	0.00154687	0.00171875	0.00142969	0.00145703	0.00129687	0.00139844		0.00107422	0.00107031	0.00177344
VP1	3276	C	T	265	P>S													0.00219531
VP1	3278	C	G	265	synonymous>P				0.00208984		0.00267188	0.0018125	0.00116797		0.00257813	0.00139063
VP1	3279	A	G	266	S>G				0.00101562	0.001125	0.00148828		0.00101172			0.0011875	0.00153906	0.0018125	0.00126953	0.00191797	0.00128906	0.00121875	0.00177344			0.00147656
VP1	3281	C	T	266	synonymous>S								0.00103906				0.00135156
VP1	3282	G	A	267	G>R														0.00102734	0.00264844	0.006875	0.00851563	0.0152755	0.0201069	0.0277138	0.0310855
VP1	3282	G	C	267	G>R																	0.00249219	0.00609375	0.0163343	0.0265831	0.0300987
VP1	3283	G	A	267	G>E																	0.00121875	0.00165234	0.00100781	0.00184375	0.00121484
VP1	3283	G	C	267	G>A																0.00251562	0.00392187	0.0080625	0.0099301	0.00759375	0.00807813
VP1	3284	A	G	267	synonymous>G		0.00192969	0.0014375	0.00161719		0.00171094	0.00176172	0.00203125	0.00228125	0.00208594	0.00206641	0.00354687		0.00234375	0.00321875	0.00142969	0.00149609	0.00265625	0.00157031	0.00135937	0.0011875
VP1	3286	T	C	268	V>A				0.00130859	0.00101953		0.00103906	0.00114062		0.00102344	0.00120508	0.00107031	0.00121094	0.00130469	0.00152734	0.00141406	0.00142187	0.00114062	0.00175	0.00178125	0.00128125
VP1	3287	T	A	268	synonymous>V	0.00195312	0.001125						0.00232813	0.00141406	0.00354687
VP1	3287	T	C	268	synonymous>V		0.0014375	0.00168359	0.00246875	0.00189062	0.00116406	0.0045625	0.00255469	0.00175781	0.00280469	0.00189062	0.00225	0.0024375	0.00301563	0.00375	0.00326563	0.0035625	0.00289063	0.00289063	0.00182031	0.0020625
VP1	3288	A	G	269	T>A		0.00264062	0.00529687	0.00425781	0.00511719	0.00417969	0.00546875	0.00507031	0.00571875	0.00600781	0.00592188	0.0050625	0.00560937	0.00391406	0.00482812	0.00207813	0.00108594		0.00183594	0.00117188	0.00135156
VP1	3290	C	T	269	synonymous>T												0.00134375		0.00305469	0.00130859	0.00521875	0.00492187	0.00610938	0.00289063	0.00229687	0.0021875
VP1	3291	A	G	270	T>A	0.00157422	0.00139063	0.00125391	0.00117188		0.00118359		0.00210938	0.00128125	0.00230078	0.00153125	0.00175		0.00148437	0.00144531	0.00167188	0.00120703	0.0014375
VP1	3291	A	T	270	T>S													0.00174219
VP1	3292	C	A	270	T>N														0.00120703
VP1	3292	C	T	270	T>I												0.00111719		0.00116406
VP1	3293	T	C	270	synonymous>T		0.00225	0.00157031	0.00148437	0.00147656	0.00196875	0.00116016	0.00253125	0.00189844	0.00258984	0.0026875	0.00407813	0.00719531	0.00316406	0.0425164	0.00198438	0.00251562	0.00204687	0.00203906	0.00182031	0.00172656
VP1	3294	A	C	271	T>P													0.00121875	0.002	0.0279194	0.05625	0.0911595	0.0993215	0.110629	0.127878	0.031414
VP1	3294	A	G	271	T>A													0.00142969	0.0011875				0.00182031	0.00103516	0.00149219	0.00140625
VP1	3295	C	A	271	T>N																0.00153125	0.0019375	0.00389062	0.00171484	0.00140234
VP1	3295	C	T	271	T>I												0.0010625		0.00175781	0.00175	0.00109375
VP1	3296	T	C	271	synonymous>T		0.00170312	0.00164453	0.00119531			0.00167578	0.001375	0.00107812	0.00172266	0.00182812	0.00529687	0.00116797	0.00197656	0.0016875	0.00190625	0.00139844	0.00134375	0.0014375	0.00131641	0.00173828
VP1	3297	A	G	272	R>G		0.00196875	0.002125	0.00133594	0.00111719		0.00104688	0.00165234	0.00151172	0.00160938	0.00183594	0.00454688	0.00258594	0.0024375	0.00160938	0.00128125	0.00111719	0.001875	0.00104688	0.0013125	0.00178906
VP1	3301	A	G	273	Q>R								0.0011875		0.00133203		0.00110156	0.0010625		0.001375					0.00121094
VP1	3302	A	G	273	synonymous>Q								0.00134375	0.00117969	0.00133594	0.00110156	0.00107812	0.00170312	0.00161719	0.00119531	0.00144531	0.00117969	0.00177344	0.00153125	0.00112891	0.00167969
VP1	3303	A	G	274	S>G	0.00105469	0.00222656	0.00246875	0.00264844	0.00159375	0.0010625	0.00273437	0.00246094	0.00200781	0.00208203	0.00271484	0.00353906	0.00324219	0.00310156	0.00213281	0.00173438	0.00217187	0.0020625	0.00199219	0.00132813	0.00161719
VP1	3305	C	T	274	synonymous>S										0.00133594	0.00124609	0.00189062	0.0026875	0.00258594	0.00121875
VP1	3306	A	G	275	I>V		0.00148437	0.00141406	0.0019375				0.00119531	0.00127344	0.00114844	0.00111719	0.00171094		0.00167188	0.00110938			0.00132031	0.00146875	0.0013125	0.00123438
VP1	3307	T	C	275	I>T		0.00152344	0.00100781		0.00101562		0.00126563	0.00176172	0.00100781	0.00112891	0.00101758	0.00182031	0.00483594	0.00135937	0.00115625	0.00100781	0.00159375	0.00186719	0.00139844	0.00115234	0.00195312
VP1	3308	C	T	275	synonymous>I				0.00104688		0.00117188				0.00103906		0.00190625		0.00171875	0.00110156
VP1	3309	A	G	276	T>A		0.00127344		0.00160156		0.00124219	0.00139844	0.00163672	0.0016875	0.00170312	0.00128125	0.0015625	0.00184375	0.00188281	0.0013125	0.00160156	0.00124219	0.0015625	0.00130469	0.00127734	0.00142187
VP1	3310	C	A	276	T>N							0.00107031
VP1	3310	C	T	276	T>I												0.00171875			0.00107031
VP1	3311	T	C	276	synonymous>T		0.00227734				0.00121094	0.00158203	0.00184375	0.002875	0.00292188	0.00319531	0.0028125	0.00176562	0.00378125	0.00522656	0.00171875	0.00226562	0.00185938	0.00235937	0.00224219	0.00217969
VP1	3312	A	G	277	T>A		0.00110938						0.00144922		0.00139063		0.00130469	0.00153906	0.0013125	0.00110156	0.00176562	0.00121875	0.00160156	0.00119141	0.00109375
VP1	3313	C	T	277	T>I		0.00109375	0.00388281	0.00170312	0.00142187		0.00100391	0.00125391		0.0015625	0.00198047	0.00534375	0.00821875	0.00153906	0.00157813			0.00167188
VP1	3314	A	G	277	synonymous>T		0.0015	0.00131641	0.00154687	0.00191406		0.00154687	0.00233594	0.00175781	0.00182031	0.00178906	0.00665625	0.00365625	0.00332812	0.0016875	0.00126563	0.00280469	0.00354687	0.00220313	0.00140625	0.00146875
VP1	3315	A	C	278	M>L												0.00134375
VP1	3315	A	G	278	M>V		0.00185156		0.00180469	0.00205469			0.00236328	0.00126953	0.00134766	0.00311719	0.00958059	0.0040625	0.00476563	0.00190625	0.00109375	0.00240625	0.00378125	0.0028125	0.00251172	0.00182812
VP1	3315	A	T	278	M>L		0.0010625		0.00128125								0.00163281
VP1	3316	T	C	278	M>T		0.00133594		0.00104688				0.00146875	0.00121094			0.00222656	0.00136719	0.00160156	0.00152344		0.00132813	0.00120312			0.001625
VP1	3318	A	G	279	T>A	0.00132031	0.00148828	0.00209375	0.00152734	0.00146094		0.001875	0.00200781	0.002875	0.00259375	0.00233594	0.00192188	0.00346875	0.00238281	0.00285156	0.001875	0.00104688	0.00195312	0.00205859	0.00201562	0.00184375
VP1	3319	C	T	279	T>I																0.00107031		0.00101562
VP1	3320	A	G	279	synonymous>T				0.00102734	0.001125			0.00117969	0.00122656			0.00220313	0.00128906	0.00229687	0.002125	0.00123438		0.0013125	0.00125391	0.00126953	0.00140625
VP1	3321	A	G	280	N>D												0.00110938	0.00109375					0.00166406	0.00100781
VP1	3322	A	C	280	N>T	0.0291941	0.0460938	0.133902	0.134087	0.0185855	0.0359375	0.0340049	0.152005	0.0596628	0.133532	0.0691612	0.00931332	0.032977	0.0228824	0.0220806	0.0205181	0.0745477	0.0777138	0.125164	0.0243832	0.0314145
VP1	3322	A	G	280	N>S		0.00124219	0.00134375		0.00127344		0.00130469	0.00149219	0.00101562	0.00132031	0.001375	0.00159375	0.00567969	0.0024375	0.00222656		0.00154687	0.00163281		0.00106641	0.00133984
VP1	3323	T	C	280	synonymous>N	0.00309375	0.00428125	0.00896875	0.00941612	0.0039375	0.00480469	0.00471875	0.0111842	0.00689063	0.0127673	0.00771875	0.00396875	0.00875	0.00800781	0.00467187	0.00354687	0.00962171	0.0100329	0.0103824	0.00415625	0.00532812
VP1	3324	A	G	281	T>A			0.00105469			0.00178125	0.00100391	0.00164844	0.00146094	0.00103906		0.00139844		0.00155078	0.00115625			0.00132031
VP1	3325	C	T	281	T>M								0.00112891			0.00123438	0.00198438	0.00332812	0.00120312	0.0018125				0.00126953	0.00157031
VP1	3326	G	A	281	synonymous>T										0.00105469								0.00117188

## Sheet: replicate 2
Feature	Position	Reference	Aternate	AA_position	AA_change	p1	p3	p5	p7	p9	p11	p13	p15	p17	p19	p21	p23	p27	p31	p33	p35	p37	p39	p40
VP4	779	A	G	1	synonymous>G	0.00261719	0.0020625	0.00225	0.00297656	0.00227344	0.00232813	0.00221875	0.00116406	0.00253125	0.00259375	0.00194531	0.0024375	0.00178125	0.00278125	0.00183594	0.00265625		0.00230469	0.00270312
VP4	780	G	A	2	A>T												0.0014375	0.00158594
VP4	782	T	C	2	synonymous>A		0.0021875	0.00180859	0.00250781	0.00178125	0.0019375	0.00240625	0.00157422	0.00307812	0.00325	0.00275	0.00426563	0.0020625	0.00275	0.00403125	0.0035	0.00298437	0.00275	0.00297656
VP4	784	A	G	3	Q>R																			0.00114453
VP4	785	A	G	3	synonymous>Q		0.00384375	0.001875	0.00257031	0.00234375	0.00136719	0.00117188	0.00164062	0.00234375	0.00145313	0.00183594	0.00165625	0.00217969	0.00151563	0.0014375	0.00142187	0.00220313	0.00182031	0.00123828
VP4	787	T	C	4	V>A				0.001125	0.00122656	0.00110547	0.00155469	0.0013125	0.00144531	0.00200781			0.00111719	0.00104297					0.00117969
VP4	788	A	G	4	synonymous>V	0.00153125	0.00335156	0.00154687	0.00235937	0.00184375	0.00175	0.0019375	0.00238281	0.00250781	0.00354687	0.00322656	0.001875	0.00214844	0.00207813	0.00166016	0.00185938	0.00228125	0.00216406	0.00229687
VP4	789	T	A	5	S>T							0.00110156		0.00123438	0.00160938	0.00307812	0.00298437	0.00191406
VP4	789	T	C	5	S>P												0.00128125		0.00107031	0.00124219	0.00128516		0.00163281	0.00115625
VP4	791	A	G	5	synonymous>S	0.00191797	0.00365625	0.00200781	0.00292188	0.00180469	0.00164844	0.00157031	0.00155469	0.00199219	0.00113281	0.00148437	0.00229687	0.00142969	0.00120703	0.00134375	0.00157813	0.00196875	0.00220313	0.0016875
VP4	792	A	G	6	T>A									0.00152734			0.0011875				0.00125781	0.00128906	0.00138672
VP4	793	C	T	6	T>M		0.00134766	0.00112109	0.00124609													0.00101562
VP4	794	G	A	6	synonymous>T												0.00226562	0.00153906	0.00115625	0.00117969	0.00146875
VP4	794	G	T	6	synonymous>T														0.00104688	0.00161719	0.0023125	0.00380469	0.0049375	0.00392187
VP4	796	A	G	7	Q>R												0.00107812
VP4	797	A	G	7	synonymous>Q	0.0011875	0.0011875	0.00103516	0.00115625	0.00141406				0.00159375	0.00132813	0.00120312				0.00107422	0.00107812		0.00111328
VP4	799	A	G	8	K>R	0.00132813	0.00140625	0.00228125	0.00258594	0.00197656	0.00141406	0.0015625	0.00140234	0.00176562	0.00153125	0.00188281	0.00157031	0.00157813	0.0020625	0.00167188	0.00197656	0.00146875	0.00165625	0.00199219
VP4	801	A	G	9	T>A	0.00109375	0.001875	0.00161719		0.00151563	0.00110938	0.00115625	0.00148047	0.00196875	0.00105469	0.00125	0.00151563	0.00135937		0.00216406	0.002	0.00171875		0.0028125
VP4	803	T	C	9	synonymous>T		0.0016875	0.00125391	0.00116797	0.00103516	0.00125391			0.00221875	0.00124219	0.00235156	0.00160938	0.00111719	0.002375	0.00130859	0.00194531		0.00114062	0.00139063
VP4	806	G	A	10	synonymous>G											0.00153125	0.0010625	0.00124219	0.00178125	0.00125	0.00160156			0.00119531
VP4	806	G	T	10	synonymous>G														0.00179688	0.001375	0.00132031
VP4	808	C	T	11	A>V													0.00103906			0.00110156
VP4	809	A	G	11	synonymous>A		0.00135547	0.00121094		0.00101953	0.00113281	0.00167969	0.00173828	0.00125781	0.00225	0.00125781	0.00183594	0.00248437	0.00148437	0.00129687	0.00104688	0.00179688	0.00152344
VP4	811	A	G	12	H>R		0.00108594	0.00174219	0.00121484	0.00153125	0.00151563	0.00149219	0.00103125	0.00151563	0.0010625				0.00145313	0.00146875	0.00142187	0.00147656		0.00103125
VP4	812	T	C	12	synonymous>H	0.002375	0.00252344	0.00326563	0.00375781	0.00342969	0.0033125	0.00205859	0.00296875	0.00228125	0.00353125	0.00200781	0.00245313	0.0015625	0.00207813	0.00321875	0.0033125	0.00263281	0.00253906	0.0024375
VP4	814	A	G	13	E>G		0.00214844	0.00171094	0.00145313	0.00147656	0.00124219	0.00133984	0.00183594	0.00225		0.00148437		0.00135937	0.00175781	0.00166797	0.00194531	0.00148437	0.001875	0.001375
VP4	815	G	A	13	synonymous>E														0.00101562
VP4	816	A	G	14	T>A	0.0025625	0.00238281	0.00217969	0.0025	0.0018125	0.00141406	0.00348438	0.00253125	0.00332031	0.00265625	0.00310547	0.00165625	0.00289063	0.00257031	0.00294531	0.00195312	0.00251562	0.00259375	0.00253125
VP4	818	C	T	14	synonymous>T		0.00100781	0.001125	0.00189062					0.00188281		0.00155469		0.00148437
VP4	819	A	G	15	R>G	0.00115625	0.00160938	0.00193359	0.00207813	0.00125391	0.00148047	0.00142187	0.00125	0.00182812	0.00292188	0.00315625	0.00175	0.005375	0.00995066	0.008	0.00240625	0.00373437	0.00492187	0.00498438
VP4	821	G	A	15	synonymous>R																		0.00134375
VP4	822	C	T	16	synonymous>L						0.00122656	0.00135156		0.00152344	0.00126563			0.00134375
VP4	823	T	C	16	L>P		0.00107031		0.0015			0.00110938			0.00107031			0.00160938	0.00157813	0.00115625	0.00289063	0.00214062	0.00227344	0.00178906
VP4	825	A	G	17	N>D			0.00136719	0.001375				0.0010625	0.0021875	0.0020625	0.00171875	0.00115625	0.005125	0.00885937	0.00701563	0.00603125	0.0055	0.00592188	0.007625
VP4	826	A	G	17	N>S		0.00107031	0.00171875	0.00153125	0.00229687	0.00170703	0.00166016	0.00177344	0.00167188	0.00280469	0.00174219		0.00157031	0.00185156	0.00126563	0.00122656		0.00116406	0.00129687
VP4	827	T	C	17	synonymous>N		0.00104688						0.00130078	0.00195312	0.00248437	0.00221875	0.0021875	0.00196875	0.00322656	0.00154687			0.001375	0.00104688
VP4	828	G	A	18	A>T														0.00128125	0.00151563	0.00282812	0.00258594	0.0035	0.00227344
VP4	830	T	A	18	synonymous>A											0.00184375	0.00220313	0.00248437	0.00101562
VP4	830	T	C	18	synonymous>A		0.00157813			0.00122656		0.0010625		0.00171875	0.00141406	0.00173438	0.00127344	0.00142969	0.00298437	0.0050625	0.0055	0.00490625	0.00419531	0.00374219
VP4	831	A	G	19	S>G	0.001875	0.00198438	0.00175	0.00253125	0.00159766	0.00132422	0.00158203	0.00139063	0.00217187	0.00153906	0.00217969	0.00135937	0.00264062	0.0035625	0.003	0.00246875	0.00285937	0.00186719	0.00303125
VP4	832	G	A	19	S>N
VP4	833	C	T	19	synonymous>S		0.00110938		0.0010625											0.00117969
VP4	834	G	A	20	G>S														0.00122656	0.00131641				0.00165625
VP4	835	G	A	20	G>D													0.00117188			0.00155469	0.00203125	0.00223438	0.0025
VP4	836	C	A	20	synonymous>G																	0.0011875	0.00323438	0.00200781
VP4	836	C	T	20	synonymous>G								0.00135156	0.001375			0.0010625	0.00182812	0.0071875	0.011801	0.00990954	0.00832812	0.00555469	0.00578125
VP4	837	A	G	21	N>D							0.00115625		0.002125	0.00139063	0.00166406		0.00265625	0.00152344	0.00158203			0.00188281	0.0013125
VP4	838	A	G	21	N>S									0.0015	0.00179688	0.00129687	0.00102344	0.00139063	0.00167969	0.00182031
VP4	839	T	A	21	N>K																			0.00133594
VP4	839	T	C	21	synonymous>N		0.00144531	0.00107422		0.00101172	0.00119531	0.00157031		0.00132031	0.00169531		0.0016875	0.00232813	0.00235156	0.0014375	0.00142187	0.00154687	0.00164844	0.00292969
VP4	840	T	C	22	S>P		0.00121094	0.00125781	0.00146875	0.00160156	0.00159375	0.00128125	0.00151563	0.00157031	0.00119531	0.00153516	0.00240625		0.00196875	0.00229687	0.00239062	0.00257813	0.0023125	0.00222656
VP4	842	C	T	22	synonymous>S											0.00110938
VP4	843	A	G	23	I>V		0.00114062	0.00109375	0.00190625					0.00117188				0.00125781	0.00126563					0.00121875
VP4	844	T	A	23	I>N																		0.00105078	0.00215625
VP4	844	T	C	23	I>T	0.00175781	0.00225	0.00223438	0.00410938	0.00394531	0.00396875	0.00420312	0.0059375	0.00665625	0.00571875	0.00453906	0.0036875	0.004625	0.004625	0.00303125	0.00295312	0.00224219	0.00390625	0.00309375
VP4	845	C	T	23	synonymous>I				0.00129687	0.00121094						0.00101562		0.00121094	0.00103125			0.00125
VP4	846	A	G	24	I>V		0.00219531	0.00110938	0.00172656			0.00106641		0.00125		0.00132031	0.00153125	0.00216406	0.002875	0.00279688	0.00271875	0.00249219	0.00242969	0.00328125
VP4	847	T	C	24	I>T		0.0024375	0.00144531	0.00159766	0.001125	0.00123438	0.00130469	0.00141406	0.002875	0.00183594	0.00128516		0.00159375	0.00225	0.00238281	0.00184375	0.00207031	0.00253125	0.00151563
VP4	848	T	A	24	synonymous>I
VP4	848	T	C	24	synonymous>I		0.00150781		0.0025	0.00148437	0.00175	0.001875	0.00146875	0.00283594	0.00226562	0.002125	0.00148437	0.0019375	0.003875	0.00365625	0.00198438	0.00209375	0.00149219	0.00198438
VP4	850	A	G	25	H>R		0.0025625	0.00117188	0.00215625		0.0010625	0.00130078		0.00205469		0.00119141		0.0016875	0.00110938	0.00136328	0.001625	0.00215625	0.00145313	0.00114844
VP4	851	C	A	25	H>Q		0.00132813	0.00183594	0.00125					0.0015625		0.00125781		0.0020625
VP4	851	C	T	25	synonymous>H		0.00107812	0.00124219	0.00261719	0.0016875	0.00123828	0.00140625		0.00314063		0.00323438	0.00115625	0.00265625	0.002125	0.00189062		0.0015	0.00146875
VP4	852	T	C	26	Y>H	0.00178125	0.00229687	0.0025	0.00246875	0.00253125	0.00215625	0.00128125	0.00117188	0.0026875	0.00121875	0.00240625	0.00184375	0.0015	0.00145313	0.00167969	0.00155469	0.00174219	0.00157031	0.0013125
VP4	853	A	G	26	Y>C	0.00123828	0.0015	0.00167969	0.00261719	0.00136328	0.00135156	0.00106641	0.00120312	0.00178906	0.00139063	0.00182031	0.0015	0.00159375	0.00153125	0.00108594	0.001875	0.00146875		0.00153125
VP4	854	C	T	26	synonymous>Y	0.00135937	0.00224219	0.00266406	0.00545313	0.00254688	0.00264844	0.00214844	0.00182031	0.005	0.00121875	0.00513281		0.00251562	0.00211719	0.00134375	0.00146875	0.00175	0.00107422	0.00109375
VP4	855	A	G	27	T>A	0.0014375	0.00159375	0.00125781	0.00176172	0.00174609	0.00140234	0.0014375	0.00153125	0.00148437	0.00159375	0.001875				0.00153906	0.00175781	0.00250781	0.00149609	0.0015625
VP4	857	A	G	27	synonymous>T	0.00116406	0.00378125	0.00245313	0.00300781	0.00167969				0.00275781		0.00248437		0.001625	0.00132813	0.00117969	0.00121094	0.00107812	0.00152344	0.00134766
VP4	858	A	G	28	N>D	0.00159375	0.00551562	0.00171875	0.00359375	0.00178125	0.00190625	0.00121875	0.00109375	0.002875		0.00225781	0.00109375	0.00167188				0.00217187	0.00117969	0.00105469
VP4	859	A	G	28	N>S	0.00178125	0.00410156	0.00163281	0.00282812	0.00175781				0.00197656		0.00157813			0.00102344			0.00135937	0.0013125
VP4	860	T	C	28	synonymous>N	0.001375	0.00111719	0.00126953	0.0026875	0.00148437	0.00130469	0.00171875		0.0015	0.00171875	0.00229687	0.00141406	0.00192969	0.0015625		0.00153125		0.00121094	0.00133594
VP4	861	A	G	29	I>V													0.0014375		0.00126563	0.00107031		0.00191406	0.00160938
VP4	863	T	C	29	synonymous>I		0.00136719	0.00128125	0.002						0.00219531	0.00253125	0.00190625	0.00110156	0.00112891		0.00107031		0.00135937
VP4	865	A	G	30	N>S		0.00108594
VP4	866	T	C	30	synonymous>N		0.00135156		0.00132031							0.0013125
VP4	867	T	C	31	Y>H	0.00121094	0.00720312	0.00330469	0.0129112	0.0050625	0.0177632	0.0186266	0.0269326		0.0019375	0.00426563	0.00122656		0.00453125	0.00402344		0.0044375	0.00885937	0.00241406
VP4	869	T	C	31	synonymous>Y		0.00475	0.00222656	0.00509375	0.00346875	0.00261719	0.0034375	0.00410938	0.00657813	0.00432813	0.0085	0.00271875	0.00515625	0.00664844	0.006	0.00489062	0.00790625	0.00657813	0.002375
VP4	870	T	A	32	Y>N		0.003375	0.00189844	0.0053125	0.00215625	0.0100329	0.00842969	0.0124383			0.00221875			0.00203125			0.00148437	0.00264062
VP4	870	T	C	32	Y>H																			0.00116406
VP4	871	A	G	32	Y>C		0.0014375		0.00132813					0.00128906								0.0011875
VP4	872	C	T	32	synonymous>Y	0.00111328	0.001375	0.00104297	0.00172656	0.00128516				0.00195312		0.00242188		0.00139063	0.00760937	0.0142064	0.0234992	0.0342105	0.0401727	0.0380757
VP4	873	A	G	33	K>E		0.00150781	0.00123047	0.00307812					0.00146875		0.00126172						0.0014375
VP4	874	A	G	33	K>R	0.00259375	0.0038125	0.00340625	0.00592188	0.00327344	0.00220313	0.00197656	0.00173438	0.004375	0.002625	0.00382813		0.00160938	0.00127734	0.00108594	0.00195312	0.00175781	0.00192969	0.00150781
VP4	877	A	G	34	D>G										0.00103906
VP4	878	T	C	34	synonymous>D		0.00138281						0.00154687	0.00117969		0.00126563			0.007625	0.00963199	0.00972451	0.0080625	0.00767187	0.00478125
VP4	879	G	A	35	A>T													0.00102344
VP4	880	C	G	35	A>G												0.00148437
VP4	881	C	G	35	synonymous>A												0.00289063
VP4	881	C	T	35	synonymous>A				0.00125391		0.0010625		0.00122656	0.00111719	0.00215625	0.00203906	0.00123438	0.00398437	0.00242969		0.00105469	0.00142187	0.00104688
VP4	882	G	A	36	A>T												0.0015625			0.00123438	0.00121094			0.001125
VP4	884	A	G	36	synonymous>A		0.00129687	0.00102344		0.00112891	0.00140625	0.00134375	0.002125	0.00192969	0.00203125	0.0019375	0.00151563	0.00146875	0.00200781	0.00279688	0.00267969	0.00192969	0.00153125	0.00135156
VP4	885	T	C	37	S>P				0.00101562		0.00172656		0.00117188		0.00165625		0.00120312	0.00171094	0.00189062	0.002125	0.00209375	0.00215625	0.00149219	0.00184375
VP4	888	A	G	38	N>D		0.00103906							0.00101562
VP4	889	A	G	38	N>S			0.00124609			0.00111719			0.00110938	0.00123438					0.00114062	0.001125		0.00122656
VP4	891	T	C	39	S>P						0.00102344	0.00157813		0.00100781	0.00153906			0.00157031	0.00109375	0.00171875	0.001625	0.00149219	0.00107031	0.00154687
VP4	893	A	G	39	synonymous>S	0.00110938	0.00146875		0.00125	0.00110938		0.00132813	0.002		0.00117188	0.00146875		0.00152344	0.00128906	0.00111328	0.00203125		0.00154687	0.00157813
VP4	896	C	T	40	synonymous>A																0.00107812
VP4	897	A	G	41	N>D										0.00117969								0.00117969
VP4	898	A	G	41	N>S		0.0013125		0.00104688						0.00102344		0.00226562	0.00115625	0.00114062		0.00123438
VP4	899	T	C	41	synonymous>N						0.00101172						0.00101562	0.00117188
VP4	902	G	A	42	synonymous>R													0.00196875					0.00103125	0.00182812
VP4	904	A	G	43	Q>R	0.00110156	0.00138281	0.00135156	0.00148437	0.00169531	0.00128125	0.00160938		0.00166406		0.00105469	0.00151563	0.00128125		0.0010625	0.00115625	0.001625	0.0020625	0.0013125
VP4	907	A	G	44	D>G					0.00101562				0.00121875			0.00125		0.00185938			0.00101562
VP4	908	T	A	44	D>E
VP4	908	T	C	44	synonymous>D		0.0023125	0.00148828	0.00196094		0.00212109	0.00170312	0.00217187	0.00157031	0.00155469	0.00182812	0.00135937	0.00161719	0.00707813	0.0125411	0.0195724	0.0237048	0.0279194	0.0240337
VP4	909	T	C	45	F>L													0.00122656	0.00132813	0.00127734		0.0014375	0.00138672	0.00127344
VP4	910	T	C	45	F>S		0.0021875	0.00132031	0.00169531		0.00169141	0.00163281	0.001875	0.00153125	0.00182031	0.00132813		0.00166406	0.00233594	0.00221875	0.00182812	0.00210156	0.00199219	0.00227344
VP4	911	C	T	45	synonymous>F				0.00102344
VP4	912	A	G	46	T>A		0.00104688					0.00101562	0.00107031	0.00113281	0.0023125	0.0018125	0.00184375	0.00310938	0.00290625	0.00334375	0.00239844	0.00103125	0.00103516
VP4	914	T	C	46	synonymous>T		0.0023125	0.00153125	0.00187891	0.00177344	0.00148437	0.00150781	0.00138281	0.00207813	0.00189844	0.00204687	0.00132031	0.00189062	0.0026875	0.00224219	0.00146875	0.00251562	0.00204687	0.00286719
VP4	915	C	G	47	Q>E												0.00107812
VP4	916	A	G	47	Q>R		0.0013125										0.00157813			0.00103906
VP4	917	A	G	47	synonymous>Q	0.00134375	0.00185938	0.00251562	0.00261719	0.0016875	0.00129297	0.001375	0.00139844	0.00224219		0.00150781	0.002125	0.00157813	0.005375	0.00948437	0.0119655	0.0111842	0.00885937	0.00585938
VP4	919	A	G	48	D>G			0.00144141		0.00129687	0.0013125	0.00189844		0.0015625	0.002125	0.00139453	0.00140625	0.00121875	0.00172656	0.00198438		0.00184375	0.00170312	0.00173438
VP4	920	C	T	48	synonymous>D				0.002625	0.00340625	0.00322656	0.00410938	0.00417187	0.00364844	0.00289063	0.00297656	0.0026875	0.00334375	0.00119531
VP4	923	G	A	49	synonymous>P			0.00110938	0.00125781						0.00139063	0.00167188		0.00140625	0.001375
VP4	924	G	A	50	G>S																		0.00108984
VP4	925	G	A	50	G>D												0.00103125
VP4	926	C	T	50	synonymous>G													0.00213281
VP4	928	A	G	51	K>R		0.00164844	0.001375	0.00158594	0.0014375		0.00134375	0.00135937	0.00220313	0.00151563	0.00136719	0.00153125		0.00112109	0.00105859	0.00146094			0.00174219
VP4	930	T	C	52	F>L		0.00210156		0.00155469	0.00142969	0.00117969	0.00114844	0.00155859	0.00177344	0.00149219	0.00101562	0.00121875	0.00116406	0.00174609	0.00125781	0.00160156	0.00146875	0.00172656	0.00154687
VP4	931	T	C	52	F>S		0.00147656	0.00115625	0.00152344	0.00132031	0.00148437	0.0013125	0.00179688	0.00150391	0.00170312	0.00102734	0.00167188		0.001875	0.0019375	0.0016875	0.00135156	0.00246094	0.00325
VP4	932	C	T	52	synonymous>F														0.00103906
VP4	933	A	G	53	T>A	0.00135156	0.00147656	0.00167969	0.00209375	0.00139063	0.00133203	0.00167188	0.002375		0.00197656	0.00196094		0.00207813	0.00137109	0.00153125	0.00278906		0.001625	0.00198438
VP4	935	A	G	53	synonymous>T		0.00189844		0.00214062	0.00163281	0.00153125	0.00126953	0.00180469	0.0020625		0.00175781		0.00173438	0.00128516	0.00123438	0.00208594	0.00152344	0.00101172	0.00178125
VP4	937	A	G	54	E>G		0.00128906	0.00137109	0.00128125		0.00119531	0.00124219	0.00103125	0.00123438			0.00173438			0.0010625	0.00123438			0.001625
VP4	938	A	G	54	synonymous>E	0.002	0.00190625	0.001625	0.00157422	0.00134375	0.00185938	0.00219531	0.00167969	0.00159375	0.00153906	0.00225781	0.00203125	0.00210938	0.00174219	0.00160156		0.00225781	0.00192188	0.00223438
VP4	941	A	G	55	synonymous>P		0.0014375	0.0010625	0.00140625	0.00108594	0.00100391			0.00189062		0.00161328		0.00110156	0.00107812		0.00132031	0.00101562		0.00121875
VP4	943	T	C	56	V>A		0.001875		0.0010625	0.00118359	0.00140625			0.00101562		0.00128125	0.0016875			0.00191406	0.00198438	0.00164844	0.00184375	0.00138281
VP4	945	A	G	57	K>E		0.002375	0.00128125	0.00207813				0.00119531	0.00207813				0.00100781	0.00112891	0.00135156	0.0015	0.00142187	0.00124219	0.0019375
VP4	947	A	G	57	synonymous>K	0.00209375	0.00353125	0.00274219	0.00351562	0.00271875	0.00225	0.00246875	0.00225781	0.00204687	0.00175	0.003875	0.00326563	0.00325	0.0021875	0.00164844	0.00170312	0.00242969	0.002625	0.00376562
VP4	949	A	G	58	D>G	0.00192188	0.00334375	0.00195312	0.00300781	0.00198438	0.00151563	0.00190234	0.00120312	0.00313281	0.00145313	0.00198438	0.00123438	0.00149219	0.00146094	0.00178906	0.00176562	0.00217187	0.00194531	0.00138281
VP4	950	T	C	58	synonymous>D		0.00148437	0.00122656	0.00175781	0.00139063		0.00121094	0.00152344	0.0021875		0.00280469	0.00234375	0.00264062	0.00198438	0.00146875	0.00120312	0.00165625		0.00132031
VP4	951	A	G	59	I>V	0.00147266	0.00340625	0.00149219	0.00295312	0.00148828	0.00104688	0.00117188	0.00157813	0.00130859	0.00105469	0.00192969	0.00146875	0.00142969	0.00108594	0.00175781	0.00160156	0.00186719	0.00190625	0.00191406
VP4	952	T	C	59	I>T		0.00169531		0.00146094	0.00127344	0.0011875			0.00234375	0.00128125	0.00123828		0.00117188	0.00135156	0.001875	0.00184375	0.00235937	0.00155469	0.0030625
VP4	953	C	T	59	synonymous>I		0.0033125	0.00188281	0.00325781	0.00217187	0.00163281	0.00125781	0.00135937	0.003875		0.00246875		0.00238281	0.002375	0.0011875		0.00160156	0.00195312	0.00185156
VP4	954	A	G	60	M>V		0.00153125	0.00214844	0.00353125	0.00211719	0.00202344	0.00120703		0.00354687	0.00114062	0.00104297			0.00142187		0.0011875	0.00153125	0.00216406	0.00104688
VP4	955	T	C	60	M>T		0.001875		0.00245313	0.00151563	0.00150781			0.00233594		0.00132031	0.00123438	0.00101172	0.00114062	0.00131641	0.00114062	0.00129687	0.00148437	0.00178906
VP4	956	G	A	60	M>I			0.00122656	0.00111719		0.00417187	0.00962171	0.00239062		0.00174219	0.00110156				0.00192188	0.00119531		0.00128125
VP4	957	A	G	61	I>V		0.00257813	0.00159375	0.00192969	0.00126563	0.00145313	0.00163281	0.00208594	0.00190625	0.00228125	0.0031875	0.00328125	0.00292969	0.00213281	0.00172656		0.00141406	0.00190625
VP4	958	T	C	61	I>T				0.00125			0.00185156		0.00257813	0.00307812	0.00133203	0.00153125
VP4	959	T	C	61	synonymous>I							0.00108984				0.00128125		0.0020625
VP4	961	A	G	62	K>R		0.0015625		0.00132813														0.00103125
VP4	962	A	G	62	synonymous>K											0.00109375		0.00146875
VP4	963	T	C	63	S>P		0.00147656						0.00103906	0.0015			0.0011875	0.00110938	0.0010625	0.00134375	0.00147656	0.00139844	0.00108594	0.00138281
VP4	965	A	G	63	synonymous>S			0.00155469	0.00103125		0.00145313			0.00105859	0.00204687	0.00128906		0.00175781		0.00139063	0.00125	0.00105469	0.001375	0.00147656
VP4	966	C	T	64	synonymous>L	0.00782812	0.0108553	0.0120477	0.0065	0.00303125	0.0367187	0.0632196	0.0177837	0.001625	0.00748438	0.00496094	0.00284375		0.0071875	0.00845313	0.00271875	0.00970395	0.0150082	0.00765625
VP4	967	T	A	64	L>Q	0.00557812	0.00582812	0.00854687	0.00410938	0.00253906	0.0264803	0.0514803	0.011986		0.00465625	0.00341406	0.00167188		0.00440625	0.00525	0.0010625	0.00598437	0.00938528	0.00265625
VP4	967	T	C	64	L>P											0.00107031			0.00120312	0.00110156			0.0013125
VP4	968	A	G	64	synonymous>L			0.00123828	0.001625	0.00142969		0.00117969	0.00104688	0.00128906	0.00184375		0.00111719			0.00144531			0.00195312
VP4	970	C	T	65	P>L												0.0010625
VP4	971	A	G	65	synonymous>P		0.00109375	0.001625		0.001375	0.001625	0.00135937	0.00190625	0.00201562	0.00135937	0.00190625	0.00110938	0.00175	0.001625	0.00157031	0.00140625	0.00271875	0.00204687	0.0020625
VP4	971	A	T	65	synonymous>P										0.00102344
VP4	974	T	C	66	synonymous>A		0.0029375	0.00142187	0.00204687	0.00180469	0.00239062	0.00160156	0.00228125	0.00198438	0.002625	0.00270312	0.001875	0.00215625	0.00269531	0.0021875	0.00358594	0.00309375	0.001875	0.00279688
VP4	976	T	C	67	L>P	0.00110156	0.0015	0.001875	0.00213281	0.00182812	0.00144141	0.00159375	0.00126953	0.00261719	0.00173438	0.00175	0.00253125	0.0035	0.00217969	0.00208594	0.00155469	0.00159375	0.00248437	0.00254688
VP4	977	C	T	67	synonymous>L																			0.00105469
VP4	978	A	G	68	N>D											0.00100781		0.00102344	0.00142969	0.00121875			0.00101953
VP4	979	A	G	68	N>S							0.00116797								0.00120312	0.00125781		0.00124609	0.00135937
VP2	981	T	C	1	S>P		0.00121875		0.00227344	0.00228906	0.00149219	0.00135937	0.00241406	0.00270312	0.00239062	0.00126563	0.0024375	0.00138281	0.002	0.00226562	0.00160938	0.00197656	0.00227344	0.00255469
VP2	986	C	T	2	synonymous>P				0.00128125				0.001125	0.00128125		0.00317187	0.0016875	0.00217187	0.001375	0.00109375	0.001125	0.00153125	0.00121875	0.00161719
VP2	987	A	G	3	T>A		0.00103125		0.00101562										0.00192188		0.00126563	0.00110938	0.00107031
VP2	989	A	G	3	synonymous>T		0.00159375	0.00109375	0.00178125			0.00113281		0.00182812	0.00125781	0.00192188	0.00185156	0.0010625	0.00232031	0.00159375	0.00229687		0.00123438	0.0016875
VP2	991	T	C	4	V>A														0.00110156
VP2	992	A	G	4	synonymous>V	0.00239062	0.00254688	0.00203125	0.004375	0.0021875	0.0026875	0.00189844	0.00230469	0.00388281	0.00203125	0.00357813	0.00128125	0.00223438	0.00351562	0.00270312	0.0045625	0.0019375	0.00259375	0.00221875
VP2	994	A	G	5	E>G	0.00120312		0.00183594	0.00198438	0.00214062	0.00112891	0.0015625	0.00145313	0.002375	0.00221875	0.0025625	0.00115625	0.0015	0.00189062	0.00228906	0.00234375	0.00225	0.00228125	0.00215625
VP2	997	A	G	6	E>G	0.00114453	0.00151563	0.00128906	0.0013125	0.00108984	0.0015625	0.00141406	0.00110938	0.00148437	0.00154687	0.00132813		0.001375	0.0013125	0.00176562	0.00278906	0.00107812	0.00184375	0.00207813
VP2	999	T	C	7	C>R										0.00103906				0.001125					0.00124219
VP2	1001	C	T	7	synonymous>C		0.00101562			0.00103125	0.00109375	0.00112891			0.0015625	0.00150781	0.00232813	0.00215625	0.00196875	0.00223438	0.00301563	0.00323438	0.00320312	0.00325
VP2	1002	G	A	8	G>R
VP2	1004	A	G	8	synonymous>G		0.0020625	0.00114844					0.00158203	0.00126953		0.00116406		0.00164062	0.00490625	0.007	0.00621875	0.00790625	0.005875	0.00448438
VP2	1004	A	T	8	synonymous>G						0.00117188	0.00104688
VP2	1005	T	C	9	Y>H										0.00102344					0.00104688
VP2	1006	A	G	9	Y>C
VP2	1007	C	T	9	synonymous>Y													0.00113281		0.00105469	0.00117188	0.00114062	0.00130469
VP2	1008	A	G	10	S>G		0.00178125	0.00145313	0.00214844	0.00107812	0.00155469	0.00129687		0.0018125	0.00159375	0.00167188	0.0016875	0.00152344	0.00167188	0.00159375		0.00219531	0.00157813	0.00119531
VP2	1010	T	C	10	synonymous>S		0.00176562	0.00259375	0.00390625	0.00404688	0.00416406	0.00664063	0.00671875	0.0073125	0.00807813	0.00628125	0.005	0.00696875	0.00321875	0.00373437	0.00353125	0.00253125	0.00264844	0.0028125
VP2	1012	A	G	11	D>G		0.00120312	0.00173438	0.00142187	0.00149219	0.00101562	0.001875		0.00110156	0.00175	0.00119141	0.00217187	0.00144531	0.00126563	0.00155469	0.00108594	0.00140625	0.00153906	0.00174219
VP2	1013	C	T	11	synonymous>D		0.00125	0.0010625	0.00126953					0.00154687		0.00173438	0.0015625	0.00159375
VP2	1014	A	G	12	R>G	0.00167188	0.00189062	0.00245313	0.00354687	0.00133984	0.00140625	0.0014375	0.00121875	0.00164062	0.00222656	0.00147656		0.00179688	0.00170312	0.0015625	0.00188281	0.00242969	0.00125	0.00260937
VP2	1018	C	T	13	A>V																			0.00154687
VP2	1019	G	A	13	synonymous>A											0.00138281
VP2	1020	A	G	14	R>G		0.00182812	0.00109375	0.00177344	0.00103125		0.00109375	0.00201562	0.00161719	0.00166406	0.00108594	0.0014375	0.00157031	0.00184375	0.00134375	0.00110156	0.00203125	0.00215625	0.00104688
VP2	1022	A	G	14	synonymous>R		0.00263281		0.00165625	0.00121875	0.00134375	0.00139844	0.00164844	0.00108203	0.00190625	0.00161719		0.00140625	0.00217187	0.00170312		0.00253906	0.00196875	0.00185938
VP2	1023	T	C	15	S>P		0.00101562							0.00182812					0.00109766	0.00175	0.00157813	0.00130469	0.00117969	0.0015
VP2	1025	A	G	15	synonymous>S		0.00159375		0.001875	0.00110156	0.00160938	0.00153125	0.00190625	0.00244531		0.00182422	0.00107812	0.0015	0.00170312			0.00101562
VP2	1026	A	G	16	I>V		0.00160938	0.00117578	0.00126563	0.00134766		0.00121875			0.00129687			0.00109375	0.00141406		0.00127344	0.0010625
VP2	1027	T	C	16	I>T		0.0014375		0.0010625		0.00101562		0.00177344	0.00150781			0.00160938		0.002	0.00133203	0.00107031	0.00232813	0.0011875	0.00173438
VP2	1028	C	T	16	synonymous>I		0.00151563		0.00122656
VP2	1029	A	G	17	T>A		0.001375		0.00229687	0.00102734	0.00109375			0.00110156		0.00103125			0.00114062		0.00115625	0.00101562	0.00182031	0.0015
VP2	1031	A	G	17	synonymous>T	0.00153125	0.00420312	0.00145313	0.00332812	0.00152344	0.00158984		0.00103125	0.0011875	0.001875	0.00219531	0.00121875	0.00196875	0.00122656	0.00107812	0.00129687		0.00176562	0.00114844
VP2	1032	T	C	18	synonymous>L	0.00140625	0.00284375	0.00141406	0.00311719	0.00175391		0.00105469		0.00178906		0.00232813		0.00117969	0.00194531	0.00235156	0.00115625	0.0013125	0.00167969	0.00140625
VP2	1033	T	C	18	L>S		0.00109375
VP2	1034	A	G	18	synonymous>L	0.00285937	0.0045	0.00434375	0.00584375	0.00267188	0.00314844	0.00132813	0.00207813	0.00492187	0.00115625	0.00383594		0.0019375	0.0025	0.0021875	0.0010625	0.00127344	0.0015625	0.0024375
VP2	1037	T	C	19	synonymous>G		0.00147656	0.0015	0.00239062	0.00213281	0.00284375	0.00227344	0.00280469	0.00342969	0.00210938	0.0029375	0.00132813	0.00253125	0.00240625	0.00195312	0.00195312	0.00275781	0.00280469	0.002125
VP2	1039	A	G	20	N>S		0.00154687						0.00135156	0.00115625									0.00109375
VP2	1041	T	C	21	S>P	0.00112109	0.00246875	0.00178125	0.00269531	0.00198047	0.00133594	0.00107031	0.00203125	0.00177344	0.00121094	0.00186719		0.00121875	0.00233594	0.00190625	0.00203125	0.0029375	0.00273437	0.00270312
VP2	1043	C	T	21	synonymous>S											0.00114453		0.00132813	0.00446094	0.003625	0.00108594
VP2	1044	A	G	22	T>A		0.00117188		0.00121875			0.00116406				0.00134375		0.00129687	0.00116016	0.00107812	0.00136719	0.00135937		0.00127344
VP2	1045	C	T	22	T>I			0.00103125			0.00454688	0.0119449	0.00482812									0.00109375	0.00146875
VP2	1046	C	T	22	synonymous>T
VP2	1047	A	G	23	I>V															0.00104297				0.00155469
VP2	1048	T	C	23	I>T																		0.00117188	0.00123438
VP2	1049	A	G	23	I>M									0.00102344							0.00144531
VP2	1050	A	G	24	T>A		0.00196875		0.00126563	0.00117969				0.00164062		0.00154687	0.00109375	0.00129687	0.0015625			0.00101172		0.00101562
VP2	1052	G	A	24	synonymous>T						0.00103906	0.00234375	0.00108594								0.0015		0.00103906
VP2	1053	A	G	25	T>A		0.0025		0.00103125			0.00103125						0.00100781		0.001125	0.00148437
VP2	1055	T	C	25	synonymous>T	0.00117188	0.0034375	0.00158594	0.00205469	0.00169922	0.00117188	0.00109375	0.0014375	0.00284375	0.00154687	0.0023125	0.00127344	0.00315625	0.00357031	0.00210156	0.0024375	0.00164062	0.00182812	0.0018125
VP2	1057	A	G	26	Q>R	0.00145313		0.00182812	0.00225	0.00160547	0.00166016	0.00159375	0.00132422	0.00196875	0.00105469	0.00160938		0.00127344	0.00135156	0.00210156	0.00173438	0.001125	0.00104688	0.00196094
VP2	1060	A	G	27	E>G										0.00132031		0.001125		0.00116406	0.00142969		0.00154687
VP2	1061	A	G	27	synonymous>E			0.00108594	0.00110156					0.00140625	0.00170312	0.00104688	0.00201562	0.0013125	0.0185855	0.0353002	0.046176	0.0474507	0.0417969	0.0294408
VP2	1062	T	C	28	C>R																			0.00103125
VP2	1064	C	T	28	synonymous>C							0.00107812		0.00132813				0.00136719	0.00107031				0.00189062	0.00164062
VP2	1067	C	T	29	synonymous>A														0.00196875	0.00220313
VP2	1068	A	G	30	N>D		0.00120312	0.00101172	0.00121875					0.00105859				0.00121094		0.00139844	0.0014375	0.0014375	0.00152344	0.00164062
VP2	1070	C	T	30	synonymous>N									0.00128906		0.00114062	0.00228125	0.00103906					0.00115625	0.00132813
VP2	1072	T	C	31	V>A			0.00101953						0.00126563	0.00142969				0.00107812	0.001125				0.00113281
VP2	1073	G	A	31	synonymous>V																0.00114062		0.00116406
VP2	1075	T	C	32	V>A			0.00175	0.001875	0.00103125	0.00164844	0.00125		0.00135937	0.00183594	0.00152344			0.00189062	0.00209375	0.00130469	0.00123438	0.00164844	0.00184375
VP2	1078	T	C	33	V>A			0.00113672		0.00107031	0.00134375	0.00101953		0.00157031		0.00109375		0.00125		0.00119531		0.00157813	0.00242188
VP2	1079	G	A	33	synonymous>V											0.00103125	0.001625
VP2	1082	C	T	34	synonymous>G								0.00121094	0.0010625		0.00184375	0.00139063
VP2	1083	T	C	35	Y>H		0.00183594	0.00111719	0.00189844	0.00126563	0.0010625			0.00107812		0.00161328	0.00134375				0.00103906	0.00117188	0.00132031	0.00146094
VP2	1084	A	G	35	Y>C		0.00110938		0.0019375											0.00194531		0.0010625	0.00153125
VP2	1085	T	C	35	synonymous>Y		0.00178906	0.00109375	0.00290625	0.00132813	0.00145313	0.00117188		0.0020625		0.00292969	0.001125	0.0021875	0.00211719	0.00239844	0.00134375	0.00110938	0.00214062	0.00108594
VP2	1088	A	G	36	synonymous>G	0.00117969	0.00295312	0.00145703	0.00171094	0.00208594	0.00269531	0.00135937	0.002375	0.00178906	0.00189062	0.00205469	0.00182812	0.0021875	0.00232031	0.00213281	0.00189844	0.00234375	0.00159375	0.00171875
VP2	1090	T	C	37	V>A		0.00182812	0.00103125	0.00241406				0.0010625		0.00104688		0.00128125		0.00171094	0.00107422			0.00125781
VP2	1091	A	G	37	synonymous>V	0.00270312	0.0040625	0.00422656	0.009375	0.00502344	0.00417187	0.00460156	0.0050625	0.00673437	0.00453125	0.00657813	0.00496875	0.00447656	0.00194531	0.00120312	0.00175781	0.00161719	0.002	0.00171875
VP2	1092	T	C	38	W>R		0.00185156	0.00117969	0.00235937	0.00165625	0.00164844			0.00139063		0.00178125	0.0011875	0.00155469			0.00185938	0.00115625	0.001625	0.00146875
VP2	1093	G	A	38	W>*				0.00102344								0.00103906
VP2	1097	A	G	39	synonymous>P			0.00105469	0.00207813					0.00107812		0.00111328			0.00110938	0.00152344	0.0015	0.00157813	0.00146094	0.00114844
VP2	1099	A	G	40	D>G														0.00117188		0.00163281	0.00157031	0.00111719
VP2	1100	T	C	40	synonymous>D		0.00192188	0.00117188		0.00117188						0.00135547	0.00123438		0.0210526	0.0472862	0.0632813	0.0626645	0.045477	0.0449013
VP2	1103	T	C	41	synonymous>Y		0.00160156	0.00101562	0.00135937		0.00104688		0.00125			0.00221875		0.00113281	0.00125			0.00176562	0.00165625	0.0015
VP2	1104	C	T	42	synonymous>L			0.00116406	0.00153125	0.00110156			0.00133203	0.001875	0.00139063	0.00178125		0.00224219	0.0038125	0.00139063
VP2	1105	T	C	42	L>P		0.0023125	0.00148437	0.00171094	0.00124219				0.00190625		0.00121875			0.00111328				0.00120312	0.00178125
VP2	1106	A	G	42	synonymous>L		0.00132422	0.00125781	0.001875					0.00228906		0.00138672
VP2	1107	A	G	43	K>E	0.00202344	0.00436719	0.00309375	0.00342187	0.00154687	0.00120312	0.00135156		0.00447656		0.001625			0.001375	0.00102344
VP2	1108	A	G	43	K>R	0.0024375	0.0084375	0.00524219	0.00984786	0.00392187	0.0036875	0.00280469	0.00217969	0.0120271	0.00197656	0.00741406	0.001125	0.00446875	0.00428125	0.00198438	0.0014375	0.00209375	0.002	0.00233594
VP2	1109	G	A	43	synonymous>K				0.00111719							0.00122656
VP2	1111	A	G	44	D>G		0.00158594	0.001375	0.00132422	0.0013125			0.00109375			0.00119922		0.00100781	0.00109375	0.00166406	0.00107812	0.00123438	0.00110156
VP2	1112	T	C	44	synonymous>D		0.00135156	0.00131641	0.00167969	0.00179688	0.00167969			0.0013125	0.00120312	0.00150391		0.00200781	0.00103125	0.00146875	0.00164062		0.00146875
VP2	1113	A	G	45	S>G		0.00160938	0.00210938	0.00285156	0.00128125		0.0015	0.00166406	0.00147656	0.00104688	0.00219531	0.00173438	0.00129687	0.00125781	0.0013125	0.00185938	0.00145313	0.00178906	0.00255469
VP2	1114	G	C	45	S>T				0.00114062
VP2	1115	T	C	45	synonymous>S		0.00135937		0.00135937	0.00175781	0.00108594	0.00148437	0.00211719	0.0011875	0.0016875	0.00142187	0.003125	0.002125	0.00126563	0.00172656	0.00165625	0.00125	0.00124219	0.00171875
VP2	1117	A	G	46	E>G	0.00132813	0.00199219	0.001625	0.002375	0.00220313	0.00137109	0.00209375	0.00139063	0.00251562	0.00166406	0.00180469	0.00167188	0.00146875	0.00217187	0.00305469	0.00150781	0.00145313	0.00285937	0.00267969
VP2	1121	A	G	47	synonymous>A		0.00178125	0.00146094	0.00145313	0.00102734	0.00105469	0.0015	0.00107812	0.00117188	0.00145313	0.0013125	0.00114062		0.00176562	0.002125	0.00199219	0.001625		0.0025625
VP2	1122	A	G	48	T>A				0.00114844			0.00102734		0.00127344						0.00136719	0.00171875		0.00109375	0.00109375
VP2	1124	A	G	48	synonymous>T		0.00182812	0.00132031	0.0016875				0.00119531	0.00159375	0.0013125	0.00135937		0.00139844	0.0023125	0.00125	0.00135937	0.00153125	0.002	0.00107812
VP2	1127	A	G	49	synonymous>A		0.00160938	0.00148437	0.0019375	0.00102734		0.00107422	0.00107031	0.00169531		0.00215625		0.0028125	0.00420312	0.006625	0.00673437	0.0054375	0.00614063	0.00404688
VP2	1129	A	G	50	E>G	0.00111328	0.00136719	0.002	0.0025		0.00142969	0.00210156	0.00101562	0.00157031	0.00196875	0.00198438		0.00192188	0.00153125	0.00203125	0.00257031	0.00191406	0.00248437	0.0014375
VP2	1130	G	A	50	synonymous>E																	0.00121875
VP2	1132	A	G	51	D>G		0.00153906	0.00107422	0.00110156	0.00103906		0.00139844	0.00133594	0.0011875	0.0010625			0.00110156	0.00167188		0.00136719	0.0014375	0.00145313	0.002375
VP2	1133	C	T	51	synonymous>D									0.00139844			0.00182812	0.00127344
VP2	1135	A	G	52	Q>R							0.0011875		0.00135937	0.00125	0.00103125	0.00240625	0.00170312		0.00136328	0.00157813	0.00153125	0.00120312
VP2	1136	A	G	52	synonymous>Q	0.00115625		0.00135937			0.00102344			0.00111719	0.00116406	0.001125	0.00195312	0.00178125	0.00134375	0.00100781		0.00103906	0.00136719	0.00167969
VP2	1139	G	A	53	synonymous>P											0.00110547
VP2	1140	A	G	54	T>A					0.00107031		0.00117188		0.00155469	0.00153125					0.00113281	0.00151563	0.00167188	0.00126563	0.00150781
VP2	1142	C	A	54	synonymous>T								0.00108984					0.00245313	0.00239844	0.00260156
VP2	1144	A	G	55	Q>R		0.0010625										0.0011875		0.00134375		0.00101562			0.00109375
VP2	1145	A	G	55	synonymous>Q										0.00107031			0.0010625		0.0014375		0.00142969	0.00109375
VP2	1148	A	G	56	synonymous>P		0.00107812							0.00102734			0.001375	0.00201562	0.00110547	0.00104688
VP2	1150	A	G	57	D>G	0.00110156		0.00109766	0.00150781	0.00149219	0.00186719	0.00142969	0.00196094	0.00184375	0.00160938	0.00157031	0.0010625	0.00114844	0.00182812	0.0015625	0.00192188	0.0018125	0.00214844	0.00205469
VP2	1151	C	T	57	synonymous>D		0.00104688		0.00104688	0.00130078		0.00127344					0.00146094	0.00146875	0.00371094	0.0094778	0.0153577	0.0171875	0.0162829	0.020847
VP2	1153	T	C	58	V>A														0.00111719	0.00244531		0.00111719
VP2	1154	T	C	58	synonymous>V		0.00175781	0.00154687	0.00100781			0.00101562	0.00134766	0.00170312	0.00160938	0.00159375	0.003	0.0023125	0.00164062	0.0025	0.00236719	0.00254688	0.00129687	0.00221875
VP2	1157	C	T	59	synonymous>A				0.00115625
VP2	1158	A	G	60	T>A		0.0018125	0.00108203	0.00215625	0.00112109			0.00100781		0.001875	0.00142969			0.001125	0.00132031	0.00101562	0.00138281	0.0015	0.00115625
VP2	1159	C	T	60	T>I
VP2	1160	A	G	60	synonymous>T	0.00103906	0.00257031	0.00159375	0.00146094	0.00116797		0.0015625		0.00276563	0.00197656	0.00208594	0.00145313	0.00141406	0.00186719	0.00134375	0.00117969	0.00125	0.00146094	0.00129687
VP2	1161	T	C	61	C>R		0.00180469															0.00121094		0.00120312
VP2	1163	T	C	61	synonymous>C		0.0018125				0.00114453		0.00107031	0.00116406		0.00142187		0.0015625	0.00142969		0.00128125
VP2	1164	A	C	62	synonymous>R														0.00232813	0.00276563	0.0030625	0.00220313	0.00121875	0.0014375
VP2	1164	A	G	62	R>G		0.0011875		0.00138672
VP2	1165	G	C	62	R>T												0.0018125
VP2	1167	T	C	63	F>L		0.00265625	0.00118359	0.00161719	0.00169531	0.00139844	0.00115625	0.00195312	0.00148437	0.00164062	0.00142578		0.00199219	0.00253125	0.00167188	0.00232031	0.00240625	0.00279688	0.00225
VP2	1167	T	G	63	F>V												0.00203125
VP2	1168	T	C	63	F>S															0.00103516
VP2	1169	C	T	63	synonymous>F				0.00117969
VP2	1170	T	C	64	Y>H		0.00116406		0.0013125							0.00107812				0.00104688	0.00110156	0.00116406	0.00157813	0.00117969
VP2	1171	A	G	64	Y>C
VP2	1172	T	C	64	synonymous>Y	0.00153516	0.00385937	0.00410938	0.00545313	0.00480469	0.00378125	0.00310938	0.00354687	0.00511719	0.00303125	0.0068125	0.006	0.00479688	0.00225	0.0021875	0.00169531	0.00267188	0.002	0.00198438
VP2	1173	A	G	65	T>A		0.00161719																	0.00103125
VP2	1176	C	T	66	L>F				0.00122656
VP2	1177	T	C	66	L>P	0.00114844	0.00434375	0.00172656	0.00357813	0.00141797	0.00147656		0.001375	0.00239844	0.00195312	0.00275		0.00160156	0.001625	0.00164062	0.0013125	0.00195312	0.001625	0.00132813
VP2	1178	T	C	66	synonymous>L		0.0046875	0.00271875	0.00449219	0.00201953	0.00144531	0.00185156	0.00138281	0.0033125		0.003375	0.0023125	0.00242969	0.00273437		0.00197656	0.00196875	0.00227344	0.0018125
VP2	1180	A	G	67	D>G		0.0010625	0.00104688			0.00100781			0.00128125					0.00167188	0.00132031	0.00153906	0.00239062	0.0010625	0.0014375
VP2	1181	C	T	67	synonymous>D								0.00113281											0.00104297
VP2	1182	T	C	68	S>P	0.00132813	0.0015625	0.00204687	0.00189062	0.00150781	0.00178906	0.00239844	0.00120312	0.00147656	0.00147656	0.0018125	0.0013125	0.00141406	0.0014375	0.00254688	0.00259375	0.00292188	0.00208594	0.00236719
VP2	1184	T	A	68	synonymous>S														0.00354687	0.00626562	0.0056875	0.00715625	0.00439062	0.00436719
VP2	1184	T	C	68	synonymous>S	0.00125781	0.00428125	0.00276563	0.0028125	0.00211719	0.00121094	0.00130469	0.002375	0.00284375	0.00236719	0.0018125	0.001375	0.00390625	0.00251562	0.00216406	0.00157031	0.00184375	0.0016875	0.00271875
VP2	1186	T	C	69	V>A		0.00207813		0.00203906			0.00126563			0.00171094			0.00122656	0.00110938	0.00192969	0.00103125	0.00139063	0.0021875	0.00201562
VP2	1187	G	A	69	synonymous>V				0.00110938												0.0010625
VP2	1188	C	T	70	Q>*												0.00126563
VP2	1189	A	G	70	Q>R		0.00111719
VP2	1189	A	T	70	Q>L		0.00314063	0.0194285	0.046875	0.032463	0.0268914	0.0203331	0.0161904	0.0305921	0.0180099	0.0314762	0.0106497	0.0193873	0.0281867	0.0339227	0.0303454	0.0273849	0.0195518	0.0152138
VP2	1190	A	C	70	Q>H			0.00277344	0.00482812	0.00273437	0.00119141
VP2	1190	A	G	70	synonymous>Q	0.00350781	0.00371875	0.00421094	0.00692187	0.00415625	0.00334375	0.00317187	0.00235156	0.00490625	0.002375	0.00457813		0.00182812	0.00232031	0.00179688	0.00192969	0.00284375	0.00257813	0.00196875
VP2	1190	A	T	70	Q>H		0.00315625	0.00771875	0.0182566	0.00871875	0.00816406	0.00591406	0.00435938	0.00715625	0.003125	0.00963199	0.00335938	0.00671875	0.00420312	0.00182031
VP2	1191	T	C	71	W>R		0.00314063	0.00221875	0.00307812	0.00178906	0.0015625	0.00123438		0.00196875		0.0014375		0.00154687	0.00179688	0.00161719	0.00113281		0.00265625	0.00110938
VP2	1195	A	G	72	Q>R	0.001375	0.00196875	0.00172266	0.00249219	0.00157031	0.00107422	0.00273437	0.0018125	0.00228125	0.0021875	0.00200781		0.00150781	0.00188281	0.00178125	0.0014375	0.00240625	0.00103906	0.00235156
VP2	1196	G	A	72	synonymous>Q				0.00103906	0.00106641	0.00112891	0.00121875		0.00108594		0.00104688
VP2	1197	A	G	73	K>E
VP2	1198	A	G	73	K>R										0.00107812							0.00146094
VP2	1199	A	G	73	synonymous>K													0.00142187	0.00180469	0.0021875	0.002875	0.00269531	0.0026875	0.00203125
VP2	1200	A	G	74	T>A	0.00102344	0.00284375	0.00258594	0.00258594	0.002625	0.0028125	0.00207031	0.00225	0.00191406	0.00275	0.00196875	0.00196875	0.00316406	0.00195312	0.00197656	0.00284375	0.00214062	0.00145313	0.0021875
VP2	1200	A	T	74	T>S			0.00115625	0.00127344
VP2	1203	T	C	75	S>P		0.0026875	0.00217969	0.00190625	0.00229297	0.00142187	0.00130469	0.00139844	0.00188281	0.00200781	0.00214062	0.00182812	0.0020625	0.00223438	0.00164844	0.00203125	0.00195312	0.00248437	0.00357813
VP2	1205	A	G	75	synonymous>S					0.001375	0.00124219	0.00153125	0.00127344	0.00105469	0.0021875	0.00107031	0.0020625	0.00107031	0.00110156	0.00176953	0.00139063	0.00178906	0.00160156	0.001875
VP2	1208	A	G	76	synonymous>P	0.00121094	0.00303906	0.00201562	0.00192188	0.00105859	0.00121875	0.00117969		0.001375	0.00157031	0.00158984	0.00164062	0.00192969	0.00125781	0.00180469	0.00122656	0.00107812	0.00224219	0.0019375
VP2	1211	A	G	77	synonymous>G		0.00167188	0.00119531		0.00147656	0.00152344		0.00111328	0.0015	0.00121094	0.00129297	0.00328125	0.00141406	0.0015625		0.0010625	0.00157031	0.00142187
VP2	1212	T	C	78	W>R				0.00102344		0.00109375			0.00135937			0.00151563		0.00142969	0.00123438	0.00132031	0.00135937	0.00141406
VP2	1215	T	C	79	W>R		0.00172656	0.00146875	0.00143359	0.00134375	0.00154297	0.00142187	0.0014375	0.00167188	0.00166406	0.00163281		0.00158594	0.00128906	0.00160938	0.00240625	0.00128125	0.00239062	0.00195312
VP2	1218	T	A	80	W>R												0.00134375
VP2	1218	T	C	80	W>R		0.00114062		0.00148437	0.00140625	0.0013125	0.00136719	0.00121875	0.00163281		0.001125	0.001125	0.00134375	0.00128125	0.0010625	0.00225781	0.0016875	0.00182812	0.00207813
VP2	1220	G	T	80	W>C												0.001625
VP2	1221	A	G	81	K>E		0.00104688					0.00100391							0.00127344	0.00157813	0.00125781	0.00122656	0.00123438	0.00122656
VP2	1221	A	T	81	K>*												0.00217187
VP2	1222	A	G	81	K>R	0.00139063	0.00225	0.00165625	0.00196875	0.00157813	0.00260937		0.00153516	0.00251562	0.00232813	0.00208594	0.0030625	0.00216406	0.00308594	0.00271875	0.00151563	0.002	0.00160156	0.002875
VP2	1223	G	A	81	synonymous>K																	0.00109375
VP2	1223	G	C	81	K>N												0.00192188
VP2	1225	T	C	82	L>P		0.00153906	0.00154687	0.00117969	0.00151563	0.00154687	0.00132813	0.001375	0.00108594	0.00121875	0.001375	0.00167188	0.00121875	0.00120312	0.00154687	0.00180469	0.00173438	0.00136719	0.001625
VP2	1226	G	A	82	synonymous>L
VP2	1229	C	T	83	synonymous>P		0.001375		0.00128125		0.00132031	0.00122656	0.00133203	0.00145313		0.00160938		0.0023125		0.001125		0.00110938
VP2	1230	G	A	84	D>N		0.00121094		0.00117188					0.00111719
VP2	1232	T	C	84	synonymous>D				0.001375	0.00101172		0.00111719	0.00144922	0.00125781	0.0024375	0.00260937	0.0014375	0.00182812	0.00205469	0.00201562	0.00165625	0.002375	0.00272656	0.002
VP2	1235	T	C	85	synonymous>A	0.00301563	0.0050625	0.00523438	0.00821875	0.00497656	0.00396094	0.003	0.00272656	0.00565625	0.00245313	0.005125	0.00265625	0.00219531	0.00290625	0.0025	0.00251562	0.00353125	0.00327344	0.00329687
VP2	1236	T	C	86	synonymous>L		0.00172656							0.00140625		0.00328125	0.002	0.0014375
VP2	1239	T	C	87	S>P		0.00182031		0.00128906	0.00111719	0.00103125	0.00108594	0.00157031	0.00146875	0.00166406	0.00111719	0.00115625	0.00113672	0.00229687		0.00190625	0.0011875	0.00189844	0.00164062
VP2	1241	G	A	87	synonymous>S				0.00244531	0.00148437	0.00120312	0.00105469	0.00110547	0.00135156	0.00200781	0.00240625	0.00144531	0.00226562	0.00138281			0.00178125	0.00233594	0.00135156
VP2	1242	A	G	88	N>D
VP2	1243	A	G	88	N>S		0.00139844		0.00101562	0.00104688	0.00125	0.00101953		0.00204687	0.00117188	0.00110156		0.00108594	0.00163281	0.00167188	0.00171875	0.00119531	0.00139063	0.00167969
VP2	1245	T	C	89	synonymous>L		0.00326563	0.00133984	0.00310156	0.00188281	0.00202344	0.00116406	0.00112891	0.00282031	0.00129687	0.00178516	0.0019375	0.00182031	0.00134375	0.00122656		0.00105469	0.00169531	0.00135937
VP2	1247	A	G	89	synonymous>L		0.00235937	0.00195312	0.0013125	0.00184375			0.00115625	0.0018125	0.00135937	0.00160156		0.00154687		0.00107031	0.00107031	0.00111719		0.00110156
VP2	1250	A	G	90	synonymous>G	0.00160156	0.0023125		0.00189844	0.00186719	0.00173438	0.00229687	0.00195703	0.00251562	0.0029375	0.00283594	0.00279688	0.00326563	0.00285937	0.00247656	0.0020625	0.00276563	0.0025	0.00248437
VP2	1252	T	C	91	L>P		0.00145313		0.00106641													0.00105469
VP2	1254	T	C	92	F>L														0.001375	0.00103125		0.00194531		0.00142187
VP2	1256	T	C	92	synonymous>F					0.00101562								0.00127344	0.00127344		0.0010625
VP2	1259	G	A	93	synonymous>G
VP2	1261	A	G	94	Q>R		0.00128125		0.00116406					0.00144531	0.00106641		0.0010625	0.00115625	0.00121875		0.00207813	0.00173438	0.00186719	0.00128125
VP2	1263	A	G	95	N>D		0.00120312										0.00134375			0.00107422	0.00138281	0.00132031		0.00110156
VP2	1264	A	G	95	N>S	0.00117969	0.00201562	0.00205469	0.0016875	0.00190625				0.00248437	0.00320312	0.00196094	0.00145313	0.0010625	0.00174219	0.0024375	0.00204687	0.00198438	0.00151563	0.00204687
VP2	1265	C	T	95	synonymous>N														0.00310938	0.0018125
VP2	1266	A	G	96	M>V		0.00157813						0.0010625		0.00132813						0.00140625			0.00160938
VP2	1267	T	C	96	M>T		0.00138281										0.001375		0.00139844	0.00115625			0.0014375	0.00100391
VP2	1270	A	G	97	Q>R	0.00110938	0.00258594	0.00299219	0.003125	0.00146875	0.00175781	0.002625	0.00190625	0.00190625	0.00172656	0.00207813	0.003	0.00139063	0.00204687	0.00164062	0.00207813	0.00171875	0.00203125	0.00259375
VP2	1271	G	A	97	synonymous>Q												0.00115625
VP2	1272	T	C	98	Y>H		0.00154687	0.00110938	0.00108203	0.00117188	0.00134375		0.00113281					0.00119922			0.00125	0.00109375		0.00153125
VP2	1273	A	G	98	Y>C				0.0010625				0.00147656						0.00109766		0.00147656		0.00102344	0.00123438
VP2	1274	C	T	98	synonymous>Y				0.0011875	0.00103125		0.00155469	0.00148437	0.0020625	0.00223438	0.00282812		0.00139844	0.00210156	0.00118359		0.00101562		0.00146875
VP2	1276	A	G	99	H>R					0.00146875	0.00103906	0.00161719	0.00132813	0.00136719	0.00129687		0.00178125	0.00103125	0.00119141	0.0018125		0.00113281
VP2	1277	C	T	99	synonymous>H													0.00103906		0.00158594		0.00119531	0.00119531
VP2	1278	T	C	100	Y>H				0.00103906														0.00105469
VP2	1279	A	G	100	Y>C
VP2	1280	C	T	100	synonymous>Y
VP2	1281	T	C	101	synonymous>L		0.0019375		0.00185938	0.00160156	0.0015625		0.00125781	0.00107422		0.00179688	0.0014375	0.00164062	0.0098787	0.0103207	0.00675	0.00407813	0.00199219	0.00271875
VP2	1283	A	G	101	synonymous>L	0.00119531	0.002125	0.00115625	0.00265625	0.00163281	0.00108984	0.00192969	0.0011875	0.00178906	0.00315625	0.00197656	0.0015625	0.00245313	0.00174219		0.00102734		0.00115625	0.00180469
VP2	1286	C	T	102	synonymous>G			0.00109375					0.00125	0.00165625	0.00135156	0.00152734
VP2	1290	A	G	104	T>A									0.00133594			0.00140625			0.00107812	0.00132813	0.00132813	0.00136719	0.00182812
VP2	1292	T	C	104	synonymous>T		0.0015625					0.00141406				0.00103906			0.00136719	0.00110156	0.0015
VP2	1295	G	C	105	synonymous>G		0.00155469	0.00145703	0.00514844	0.00190625	0.0019375	0.00103125		0.00192188	0.00134375	0.00110938	0.00110938
VP2	1296	T	C	106	Y>H		0.00172656	0.00139063	0.00144141	0.00108984		0.00113281			0.00153125	0.00173438		0.001375	0.00110156	0.00153906	0.00164062		0.0015	0.00192188
VP2	1297	A	G	106	Y>C		0.00134375															0.00114062	0.00126563
VP2	1298	T	C	106	synonymous>Y	0.001125	0.00259375	0.00164844	0.00448438	0.00270312	0.00428125	0.0078125	0.00952919	0.0153988	0.0144737	0.021176	0.0180099	0.0167352	0.0245888	0.0268914	0.0200863	0.0155839	0.008375	0.007125
VP2	1299	A	G	107	T>A				0.00140625					0.00125					0.00146875				0.00122656	0.00109766
VP2	1301	C	T	107	synonymous>T											0.00114844					0.00153125
VP2	1302	G	A	108	V>I		0.00158594	0.00334375	0.00575	0.00279688	0.00189062	0.00190625	0.0016875	0.00294531	0.0015625	0.0031875	0.00157813	0.00247656	0.0023125			0.00142969	0.00190625	0.00139063
VP2	1302	G	C	108	V>L			0.00125	0.00240625
VP2	1303	T	C	108	V>A								0.00101562				0.001875		0.00116406	0.00160938			0.001125
VP2	1304	A	G	108	synonymous>V		0.00207813	0.00109375	0.00138281	0.00142578	0.00188281	0.00279688	0.0025	0.003	0.003125	0.005125	0.00615625	0.00615625	0.0039375	0.00333594	0.0038125	0.00279688	0.00240625	0.00251562
VP2	1306	A	G	109	H>R
VP2	1307	T	C	109	synonymous>H		0.00240625	0.00160938	0.00207031	0.00124609		0.00159375	0.00130078	0.00232813	0.0019375	0.00209375	0.00225	0.00159375	0.00239844	0.0020625	0.00201562	0.00211719	0.001875	0.00190625
VP2	1309	T	C	110	V>A		0.00128906	0.00134375	0.00226562	0.00164844	0.00117969		0.00130469	0.001375	0.00196094	0.00190625	0.00184375	0.00127344	0.00208594	0.00225	0.00225	0.00185156	0.00211719	0.00220313
VP2	1310	G	A	110	synonymous>V														0.002125	0.00260156	0.0031875	0.00254688	0.00121875	0.00164844
VP2	1311	C	G	111	Q>E												0.001125
VP2	1312	A	C	111	Q>P												0.001125
VP2	1312	A	G	111	Q>R		0.00228125		0.00110547					0.00173438			0.0023125	0.00120312	0.0020625	0.00138281		0.00173438	0.00153125	0.00116406
VP2	1313	G	A	111	synonymous>Q																0.00125
VP2	1314	T	C	112	C>R		0.00171875		0.00128906		0.001125			0.00135937			0.0021875	0.00133594		0.00196875	0.001625	0.00110938	0.0010625	0.00102344
VP2	1316	C	T	112	synonymous>C		0.00136719								0.00101953
VP2	1317	A	G	113	N>D		0.00101562												0.00114453		0.00110156	0.00107812	0.00179688
VP2	1318	A	G	113	N>S		0.002125		0.00276563	0.00110938		0.00138281		0.00178125	0.00145313	0.00135937	0.00157813		0.00171875	0.0011875	0.00240625	0.00223438	0.00207813	0.0021875
VP2	1319	T	C	113	synonymous>N	0.00119531	0.00235937	0.00275	0.00215625	0.003	0.00238281	0.00168359	0.00219531	0.00236719	0.00145313	0.00259375	0.0020625	0.00185938	0.00178906	0.00213672	0.00113281	0.001875	0.00164062	0.00183594
VP2	1322	A	G	114	synonymous>A		0.00208594	0.00200781	0.0030625	0.0036875	0.00178906	0.00209375	0.00242188	0.002	0.0025	0.00232031	0.00159375	0.00235937	0.00153125	0.00179688	0.00153125	0.00135937	0.00245313	0.00151563
VP2	1323	T	C	115	S>P		0.00192188		0.00171094		0.00126563		0.00109375	0.00197656		0.00116406		0.00142187	0.00182031	0.00261719	0.00242188	0.00209375	0.0013125	0.00221875
VP2	1325	T	C	115	synonymous>S	0.00125781	0.00238281	0.00117578	0.00153906	0.001375	0.00113281	0.00141406		0.00122266	0.00207813	0.00223438	0.00148437	0.00210156	0.00174609	0.00161719		0.00133594	0.00166406	0.00165625
VP2	1327	A	G	116	K>R		0.00254688	0.00414062	0.00496875	0.00246875	0.0014375			0.00157031	0.00148437	0.00107031			0.00125				0.00142969
VP2	1328	G	A	116	synonymous>K																0.00108594	0.00196875	0.00107812	0.00100781
VP2	1329	T	C	117	F>L		0.00111719	0.00122656	0.00114844		0.00105469			0.00146875			0.0019375	0.00110938	0.00178125	0.00140234	0.00201562	0.0025	0.00117969	0.00225781
VP2	1330	T	C	117	F>S		0.00116016		0.00102344										0.00129297		0.00103906		0.00121094	0.00111719
VP2	1333	A	G	118	H>R		0.00142187	0.00152344	0.00163281		0.00128125		0.00108984	0.00108594	0.00194531	0.00125		0.00114062	0.00128125	0.00117188	0.00116406	0.0020625	0.00103125	0.00210156
VP2	1336	A	G	119	Q>R		0.0014375		0.00109375					0.00125781			0.00122656				0.00101562		0.0015625	0.0011875
VP2	1337	A	G	119	synonymous>Q	0.00112891	0.00239062	0.00242188	0.00339062	0.00170312	0.00138281			0.00296875	0.00164844	0.00246094	0.00165625		0.00133594	0.00136328	0.00109766	0.00127344	0.00122266	0.00151563
VP2	1340	A	G	120	synonymous>G		0.00189062	0.00136719	0.00192188	0.00114062	0.00120312	0.00149219	0.001875		0.00170312	0.00170312	0.00198438		0.00173438	0.00167188	0.00154687	0.0014375	0.00178125	0.00170312
VP2	1341	T	C	121	C>R															0.00124219	0.00129687
VP2	1343	C	T	121	synonymous>C									0.00109375				0.003375	0.00198438	0.00107031
VP2	1344	T	C	122	synonymous>L		0.00246094	0.00400781	0.00446875	0.00223438	0.00186719	0.00182812	0.00197656	0.00260156		0.00216797	0.00260937	0.00252344	0.00136328	0.001875		0.00154687	0.00170312	0.00171875
VP2	1345	T	C	122	L>S															0.00124609
VP2	1348	T	C	123	L>P		0.00124219	0.00140625	0.0025	0.00221094		0.00108594	0.00119531	0.002625		0.00196875		0.00127344	0.00108594	0.00127344	0.00123438	0.00141406	0.00113281	0.00217187
VP2	1349	A	G	123	synonymous>L	0.00102734	0.00188281	0.00210938	0.00276563	0.00292188	0.00250781	0.00120312	0.00178125	0.00282812	0.00160938	0.00271094		0.00178125	0.00204687	0.00123047	0.00155469	0.00155469	0.00132813	0.00134375
VP2	1351	T	C	124	V>A		0.00164062	0.00146875	0.00114844				0.00161719						0.00120312					0.00154687
VP2	1352	A	G	124	synonymous>V	0.00103906	0.00321094	0.00274219	0.006125	0.00434375	0.0053125	0.00472656	0.00522656	0.010259	0.00932813	0.0203331	0.011102	0.00514062	0.0034375	0.00289063	0.00120312	0.00236719	0.00276563	0.00224219
VP2	1354	T	C	125	V>A		0.00123438	0.00120312	0.002125	0.00121094	0.00149219	0.00133203	0.00190625	0.00229687	0.00146875	0.002	0.00214062		0.00208594	0.00139844	0.0014375	0.00167188	0.00101172	0.0015625
VP2	1355	G	A	125	synonymous>V
VP2	1356	T	C	126	C>R		0.00178125	0.00117969	0.00157031	0.0010625	0.00151563	0.0014375		0.00207813	0.00207813	0.00105078	0.00128125	0.00120312	0.00167578	0.00157813	0.00252344	0.00164062	0.00198438	0.00145313
VP2	1358	T	C	126	synonymous>C	0.00105469	0.00245313	0.00279688	0.00242188	0.0025625	0.00278125	0.00167969	0.00264062	0.00292188	0.00263281	0.00242188	0.00390625	0.00271094	0.00307812	0.00226562	0.00250781	0.00325	0.00267188	0.00313281
VP2	1359	G	A	127	V>I
VP2	1360	T	C	127	V>A						0.00120312			0.00119531	0.00157813		0.00126563	0.00101562	0.00140625	0.00142969				0.00180469
VP2	1361	A	G	127	synonymous>V	0.00123438				0.00119141	0.00129687	0.001375	0.00110156	0.00165625		0.00175781	0.00225	0.00175	0.0075	0.00973479	0.0111842	0.0103413	0.0113898	0.0107936
VP2	1361	A	T	127	synonymous>V							0.00164844	0.00157031	0.0038125	0.00576562	0.00853125	0.00953125	0.00411719	0.0015625
VP2	1364	G	A	128	synonymous>P				0.00139063		0.001875	0.00153125	0.00135937	0.001625	0.00110938	0.00182812	0.00170312
VP2	1367	A	G	129	synonymous>E		0.00148437		0.00133203		0.00104688			0.00122656	0.00122656	0.00107812	0.00155469		0.00204687	0.00232813	0.00159375	0.002	0.002875	0.00258594
VP2	1370	T	C	130	synonymous>A	0.00110938	0.0023125	0.00118359	0.00185938	0.00135156	0.00185547	0.00209375	0.00182812	0.001375	0.00109375	0.0025	0.00120312	0.00253125	0.00321094	0.00205469	0.00225	0.00245313	0.00174219	0.00233594
VP2	1372	A	G	131	E>G	0.00130469	0.00107031	0.00125	0.00190625	0.00147656	0.001875	0.00109375	0.00148437	0.00151563	0.00110156		0.00160938	0.00171875	0.0019375	0.00141406	0.00175	0.001875	0.00184375	0.001375
VP2	1373	G	A	131	synonymous>E				0.00140625	0.00114062	0.00112109			0.0010625	0.00116406
VP2	1374	A	G	132	M>V	0.00110547	0.00127344	0.00125	0.00273437	0.00160156	0.00174219	0.00175	0.00155469	0.001875	0.00183594	0.00146875	0.002625	0.00242969	0.00159375	0.00260156	0.00200781	0.00165625	0.0030625	0.00202344
VP2	1375	T	C	132	M>T		0.0015625		0.00148437		0.00114844			0.00146875						0.00116406		0.00119531		0.0010625
VP2	1379	T	C	133	synonymous>G		0.00207031	0.00152344	0.002375	0.00216406	0.00146875	0.00105469	0.00128125	0.00250781	0.00185938	0.00162891	0.00240625	0.00395312	0.00242969	0.00219531	0.00239844	0.001875	0.0026875	0.00150781
VP2	1380	T	C	134	C>R		0.0010625											0.00109375		0.00101562	0.00222656			0.00151563
VP2	1381	G	A	134	C>Y																0.00110938
VP2	1382	C	T	134	synonymous>C				0.0015625					0.001375			0.00159375	0.00114062	0.00121875				0.00101953
VP2	1383	G	A	135	A>T																0.0015625
VP2	1385	A	G	135	synonymous>A										0.00134375			0.0011875	0.00116406			0.00232813		0.00102344
VP2	1386	A	G	136	T>A													0.00101562		0.0011875	0.00179688			0.002125
VP2	1388	G	A	136	synonymous>T										0.0010625			0.00116406			0.00114062
VP2	1389	C	T	137	synonymous>L																0.00107812
VP2	1390	T	C	137	L>P		0.00157031	0.00123438	0.00226562	0.00125	0.00174219			0.00127734		0.00128906		0.00197656	0.0598684	0.112747	0.150493	0.170415	0.177385	0.170724
VP2	1391	A	G	137	synonymous>L			0.00124219	0.00150781	0.00123438	0.00175		0.00159375	0.00242969		0.00226562	0.0024375	0.00120312	0.00132031			0.00164844	0.00189062	0.00222656
VP2	1392	G	A	138	D>N														0.0474301	0.0701069	0.0747944	0.073602	0.070477	0.063898
VP2	1393	A	C	138	D>A														0.00221875	0.0034375	0.00325781	0.00123438	0.00186719	0.00208594
VP2	1393	A	G	138	D>G	0.00161719	0.00196094	0.0018125	0.00271875	0.00289844	0.00184375	0.001125	0.00164844	0.0018125	0.00233594	0.00198438	0.00175	0.0025	0.078125	0.149568	0.183306	0.206661	0.209457	0.190296
VP2	1394	C	A	138	D>E														0.0300576	0.0556538	0.0551398	0.0424753	0.0300164	0.0280428
VP2	1394	C	T	138	synonymous>D									0.00148437		0.00180469	0.00196875	0.00167188
VP2	1395	A	G	139	N>D				0.00182812			0.00103906		0.00128906	0.00100781		0.002375	0.00107031		0.00148437	0.0013125	0.00151563	0.00121875	0.00174219
VP2	1396	A	G	139	N>S	0.00105859	0.00188281		0.00123438					0.0020625	0.00159375	0.00103516	0.00173438	0.00125	0.00185938	0.00117969	0.001375	0.00155469	0.00102344	0.00101562
VP2	1397	C	T	139	synonymous>N				0.00121875						0.00113281	0.00185156		0.00138281
VP2	1398	A	G	140	T>A	0.00130859	0.00165625	0.00157813	0.00139063	0.00135937		0.00166406		0.00178125	0.00307812	0.00141797	0.00146875	0.00210938	0.00126953	0.002	0.00175	0.00164062	0.0018125	0.0021875
VP2	1400	C	T	140	synonymous>T
VP2	1403	A	G	141	synonymous>P	0.001125	0.00151563		0.00135156		0.00133594		0.00172656	0.00125781	0.00141406	0.00115625		0.00123438	0.00141406			0.00133594	0.00142187
VP2	1404	T	C	142	S>P				0.001125				0.0010625	0.00129687			0.00275		0.00138281	0.0015		0.00173438		0.00113281
VP2	1407	A	G	143	S>G							0.00102344		0.00103906								0.001625	0.00120312
VP2	1408	G	A	143	S>N		0.00175781		0.00170312	0.00133594
VP2	1409	T	C	143	synonymous>S		0.00182031		0.00167188	0.00114062				0.00221875	0.00126563	0.00193359	0.00153125	0.00265625	0.00159375	0.00142187	0.00101562		0.00110938
VP2	1411	C	T	144	A>V																			0.00123047
VP2	1412	A	G	144	synonymous>A	0.00133594	0.00204687		0.0026875	0.00253125	0.0023125	0.00142969	0.00259375	0.00157031	0.0011875	0.00242188	0.00275	0.00198438	0.00228906	0.00220313	0.00167969	0.00175	0.00190625	0.00244531
VP2	1415	A	G	145	synonymous>E										0.00110938
VP2	1416	T	C	146	synonymous>L				0.00153125					0.00159375	0.0011875	0.00141406		0.00105469	0.00130469
VP2	1419	C	T	147	synonymous>L																0.00110938	0.00110938
VP2	1420	T	C	147	L>P	0.00124219	0.00329687	0.00254688	0.00250781	0.00158594	0.0019375	0.0011875	0.00128906	0.00173438	0.00153125	0.00198828		0.00115625		0.00203125	0.00177344	0.0014375	0.00128125	0.0021875
VP2	1421	G	A	147	synonymous>L												0.00157813
VP2	1421	G	T	147	synonymous>L		0.00104688
VP2	1427	C	A	149	synonymous>G				0.00321875	0.00285937	0.0025625	0.00275	0.00272656	0.00160938	0.00207813	0.00234375	0.00171875
VP2	1427	C	T	149	synonymous>G							0.00110547	0.00118359	0.00110938	0.00170312			0.00153125	0.0071875	0.00804687	0.00701563	0.00392187	0.00210156
VP2	1428	G	A	150	D>N																		0.00124219
VP2	1429	A	G	150	D>G		0.00125	0.00116406	0.00203125	0.00170312	0.0015	0.00209375	0.00163281	0.002125		0.00136719	0.00157813	0.00170312	0.00188281	0.0019375	0.00149219	0.002375	0.00114844	0.00273437
VP2	1430	T	C	150	synonymous>D				0.0014375						0.0016875	0.00169531		0.00190625	0.003875	0.00261719	0.001625	0.00110938	0.00100781
VP2	1431	A	G	151	S>G		0.00199219	0.00129687	0.00210156	0.0015625	0.00128125	0.00117578	0.00127734	0.00257031	0.001375	0.00210938	0.0015	0.00171875	0.00217187	0.00110156	0.00192188	0.00104688	0.00116406	0.00134375
VP2	1433	C	T	151	synonymous>S								0.00113281		0.00129687			0.00140625		0.00129687	0.0019375	0.0015	0.00197656	0.00195312
VP2	1434	G	A	152	A>T																		0.00116406	0.00109375
VP2	1436	A	G	152	synonymous>A		0.00186719		0.001125				0.00130469	0.00134375		0.00157031		0.00142187	0.002375	0.00116406
VP2	1437	A	G	153	K>E																0.00122656			0.00120312
VP2	1438	A	G	153	K>R					0.00101562											0.00117188	0.00113281	0.001375	0.00110547
VP2	1441	A	G	154	E>G		0.00183594	0.00137109	0.00132813	0.00128906	0.00147656	0.00116406	0.00152344	0.00110938	0.00189062	0.00128125	0.002125	0.00182031	0.00176562	0.00151563	0.00264062	0.00149219	0.0025	0.00146875
VP2	1444	T	C	155	F>S
VP2	1445	T	C	155	synonymous>F
VP2	1446	G	A	156	A>T												0.0023125
VP2	1447	C	T	156	A>V					0.00115625		0.00171094	0.00119531	0.003125	0.00164844	0.00213281	0.002375	0.00408594	0.0122533	0.0147204	0.0153783	0.0137747	0.0125617	0.0113076
VP2	1448	G	A	156	synonymous>A				0.00124219							0.00132031		0.00175781			0.00110938
VP2	1450	A	G	157	D>G		0.00185938		0.00189062	0.0013125			0.00129687	0.001125	0.0011875			0.00128125		0.00134375	0.001125	0.00115625	0.00166406	0.00171875
VP2	1451	C	T	157	synonymous>D													0.00154687	0.0015625
VP2	1452	A	G	158	K>E																0.00116406
VP2	1453	A	G	158	K>R		0.00215625		0.0029375	0.0021875	0.00116016	0.00142187	0.00117188	0.00253906	0.00179688	0.00182812		0.00111719	0.00192188	0.00146875	0.00157813	0.0010625	0.00152344	0.00101562
VP2	1454	A	G	158	synonymous>K			0.00113281	0.00166406	0.00171094		0.00165625	0.00127344	0.00182812	0.00164062	0.00176562	0.0015625	0.00174219		0.00158594	0.0016875	0.00132813	0.00142187	0.00223438
VP2	1457	G	A	159	synonymous>P						0.0010625	0.00160156	0.00129297	0.0011875		0.00131641
VP2	1458	G	A	160	V>I												0.00117969		0.00117188				0.00132031
VP2	1459	T	C	160	V>A	0.00101953	0.00128125	0.00197656	0.00210938	0.0024375	0.00121094	0.00273437	0.00151953	0.0015	0.00210938	0.00150781		0.00240625	0.00175	0.00192969	0.0030625	0.0029375	0.00171875	0.002875
VP2	1460	C	T	160	synonymous>V										0.00125781	0.00132813		0.00136719	0.00154687	0.00220313	0.00150781	0.00241406	0.00264062	0.00175781
VP2	1461	G	A	161	A>T		0.00142969	0.00221875	0.00410156	0.00240625	0.00225	0.001625	0.00135156	0.001375	0.001875	0.00132813		0.00105469
VP2	1462	C	T	161	A>V
VP2	1463	A	G	161	synonymous>A		0.00203125				0.00101172	0.00127734	0.00121484	0.00144531	0.00159375		0.00184375	0.0026875	0.0019375	0.0018125	0.00177344	0.00134375	0.00255469	0.00104688
VP2	1463	A	T	161	synonymous>A										0.00119531	0.00119141	0.00190625	0.0043125
VP2	1464	T	C	162	S>P		0.00195312						0.00110938	0.0011875	0.00201562	0.00121875		0.00148437	0.00150781		0.00240625	0.00101562	0.00180469	0.0015625
VP2	1466	C	T	162	synonymous>S				0.00109375								0.00135937	0.00153125
VP2	1469	G	A	163	synonymous>G													0.00349219	0.00209375	0.001625	0.00110938		0.00120312
VP2	1470	T	C	164	S>P		0.001875	0.00137109	0.00225	0.00165625	0.0018125	0.00127344	0.00176562	0.00150781	0.00234375	0.00182812	0.00251562	0.0024375	0.00175	0.00239062	0.00289063	0.00199219	0.0023125	0.00258594
VP2	1472	C	T	164	synonymous>S										0.00124219
VP2	1473	A	G	165	N>D				0.00114062	0.00180469				0.00141406				0.001125	0.0113076	0.0102385	0.00421094	0.00167188	0.00190625	0.00189062
VP2	1474	A	G	165	N>S		0.00128906			0.00107812			0.00105078	0.00153125		0.00109375			0.00101953	0.00135156		0.0018125		0.0016875
VP2	1475	C	T	165	synonymous>N		0.00107812									0.00103125	0.00134375	0.00123047	0.00108594
VP2	1476	A	C	166	K>Q														0.0089375	0.00539062	0.00102344
VP2	1476	A	G	166	K>E														0.00939063	0.00635938	0.00173438	0.001875
VP2	1477	A	G	166	K>R				0.00160938					0.00129687				0.00104688	0.00121094	0.00135156	0.001625	0.00120312		0.00180469
VP2	1477	A	T	166	K>M														0.0011875
VP2	1478	G	T	166	K>N														0.00121094
VP2	1479	T	C	167	synonymous>L		0.00102344									0.00114844			0.00105469	0.00115625
VP2	1480	T	C	167	L>S		0.00150781									0.00144531			0.00155859	0.00116016	0.00114062		0.00130469	0.00128125
VP2	1480	T	G	167	L>W				0.00136328
VP2	1481	G	A	167	synonymous>L													0.0011875
VP2	1482	G	A	168	V>I																	0.00104688
VP2	1483	T	C	168	V>A		0.00165625	0.00175	0.0015			0.00132031			0.00289063	0.00420312	0.00539062	0.00820312	0.0144326	0.0060625	0.00353125	0.00207031	0.00142187	0.00289063
VP2	1484	A	G	168	synonymous>V		0.00234375	0.0021875	0.00145313	0.00184375	0.00215625	0.00178125	0.00138281	0.00180469	0.00142187	0.00245313	0.0020625	0.00259375	0.00357813	0.00251562	0.00207813	0.004625	0.00373437	0.00378125
VP2	1486	A	G	169	Q>R		0.00117969										0.001625		0.00133984	0.00130469	0.00169531	0.00142187		0.00152344
VP2	1487	G	A	169	synonymous>Q				0.00126563
VP2	1488	A	G	170	R>G		0.00214062	0.00153125	0.00185938	0.0013125	0.00167969	0.00170312	0.00148437	0.00264062	0.00172656	0.00239062			0.00134375	0.0018125	0.00214062	0.0016875	0.00140625	0.0025625
VP2	1490	G	A	170	synonymous>R				0.00121484
VP2	1492	T	C	171	V>A			0.00114062	0.00110938	0.00127344		0.0015625	0.00114844	0.00109375	0.00153125	0.00144531	0.00167188	0.00184375	0.00114844			0.00171875	0.0016875	0.00152344
VP2	1495	T	C	172	V>A				0.00117188					0.00114062	0.00116406	0.00121484		0.00114062	0.0011875			0.00130469	0.00100781	0.001125
VP2	1496	G	A	172	synonymous>V													0.00101562
VP2	1497	T	C	173	Y>H	0.00128125	0.00319531	0.00261719	0.00376562	0.00175781	0.00124219		0.00121875	0.00157813		0.0013125		0.0016875	0.0014375	0.001375		0.00113281	0.00198438	0.00178125
VP2	1498	A	G	173	Y>C		0.00157031		0.00102344				0.00136719	0.00115625		0.00124219		0.00196094		0.00130469		0.002375	0.00142187	0.00113281
VP2	1499	T	C	173	synonymous>Y					0.00159375	0.00165625	0.00223438	0.0029375	0.00465625	0.00803125	0.015625	0.0106562	0.0194901	0.02831	0.0194285	0.0167352	0.0200247	0.0228618	0.0272204
VP2	1501	A	G	174	N>S		0.00104688		0.00147656					0.0013125							0.00134375	0.00104688		0.00125
VP2	1502	T	C	174	synonymous>N		0.00171875	0.00117188	0.00182812					0.00153906	0.00109375	0.00165625	0.00153125	0.00107812
VP2	1505	A	G	175	synonymous>A		0.00246875	0.00227344	0.00310938	0.00209375	0.00178125	0.00176562	0.00132031	0.00159375		0.00174609		0.00157031	0.0016875	0.00188281	0.00175	0.00217969	0.00123438	0.00290625
VP2	1508	C	T	176	synonymous>G												0.00157813							0.00110938
VP2	1509	A	G	177	M>V																			0.00133594
VP2	1510	T	C	177	M>T		0.00184375		0.00159375	0.00126563	0.00100781			0.00138281		0.00114062				0.00129297		0.00130469	0.00142969	0.00221875
VP2	1516	T	C	179	V>A		0.0016875		0.00130469	0.00135937			0.00107031	0.00127344	0.00124219	0.00102344	0.00145313		0.0010625		0.00182812	0.00185938	0.00207813	0.00113281
VP2	1520	T	C	180	synonymous>G		0.00145313	0.00108594	0.00140625			0.00170312		0.00117188	0.00226562	0.00172656	0.00229687	0.00220313	0.00748438	0.0078125	0.00745312	0.00620313	0.00375	0.00345313
VP2	1522	T	C	181	V>A		0.00271094	0.00107422	0.00248437	0.00103125	0.00135937	0.00178125	0.0015625	0.00311719	0.00214062	0.0028125	0.0029375	0.00426563	0.00542188	0.0055	0.00559375	0.00398437	0.0029375	0.0020625
VP2	1523	T	C	181	synonymous>V									0.00152344		0.00129687			0.00125781				0.0010625
VP2	1526	A	G	182	synonymous>G		0.00105469						0.00123438	0.00153906			0.00215625		0.0025	0.00142187	0.00141406		0.00141406	0.00175
VP2	1527	A	G	183	N>D																			0.0014375
VP2	1528	A	G	183	N>S		0.00217187	0.00128125	0.00125781	0.00190625	0.00150781	0.00157031	0.00129687	0.00214062	0.00174219	0.00126953	0.00196875	0.00103516	0.00271094	0.00172656	0.00146094	0.00158594	0.00219531	0.00223438
VP2	1531	T	C	184	L>P		0.00246875	0.00121094	0.0023125	0.00140625	0.00114062	0.00147656	0.00144141	0.00198438	0.00135156	0.00210938	0.00140625	0.00240625	0.00232813	0.0023125	0.00257813	0.0023125	0.00214062	0.00235937
VP2	1532	C	T	184	synonymous>L							0.00108594
VP2	1533	A	G	185	T>A		0.00151563		0.001125	0.00107031	0.00157813		0.00153906	0.00142187		0.00164062			0.00111719	0.0018125	0.00126563		0.00192969
VP2	1535	C	T	185	synonymous>T
VP2	1536	A	G	186	I>V		0.00142187					0.00113281		0.00253125		0.00121484	0.00146875	0.00101172	0.00148437	0.00132813	0.001125	0.00129687
VP2	1537	T	C	186	I>T		0.00248437		0.00121875					0.00132031					0.00124219		0.00227344	0.00154687	0.00112891	0.00103125
VP2	1538	T	C	186	synonymous>I		0.00146094							0.00138281	0.00145313	0.001375		0.00146875	0.00171094	0.001875	0.00170312	0.00140625	0.00116797	0.00216406
VP2	1540	T	C	187	F>S		0.00138281		0.00172656	0.00103125	0.00141797						0.00139063	0.00119922	0.00139063	0.00176562	0.00210156			0.0018125
VP2	1546	A	G	189	H>R							0.0011875			0.00160156				0.00106641		0.00147656	0.001625	0.00188281
VP2	1547	C	T	189	synonymous>H
VP2	1550	A	G	190	synonymous>Q		0.00244531		0.00257031					0.00175		0.00194531	0.00151563	0.00104688	0.00127344	0.00146094	0.0015	0.00132031	0.00179688
VP2	1551	T	C	191	W>R		0.00129687							0.00160156			0.00142187		0.00111328	0.00102734			0.00110156	0.0014375
VP2	1554	A	G	192	I>V		0.00154687	0.00146094	0.00153125	0.00153516	0.00153125	0.00225	0.00123438	0.00190625		0.00151172	0.00153125		0.00217187	0.00180469	0.00247656	0.00121094	0.00164844	0.00240625
VP2	1555	T	C	192	I>T		0.00117969		0.00183594	0.00130469	0.0015625	0.00171875	0.00191406	0.00213281	0.00173438			0.0015	0.00217969	0.00220313	0.00185938	0.0025	0.00185938	0.00196875
VP2	1556	C	T	192	synonymous>I										0.00107031	0.00101953	0.00184375	0.00121875	0.00192969	0.00300781	0.0018125	0.00153906	0.00129687	0.00191406
VP2	1557	A	G	193	N>D		0.00217969	0.00133203	0.00142969	0.00120312	0.00156641	0.00210156		0.00126563	0.00157031		0.00123438	0.00140625		0.0019375	0.00121094	0.00203125	0.00196094	0.00167188
VP2	1558	A	G	193	N>S		0.00114844	0.00104297			0.00130469		0.00115625	0.00115625			0.0010625		0.00148437	0.00128125	0.00136719	0.00139063		0.00249219
VP2	1560	C	T	194	synonymous>L												0.001875
VP2	1561	T	C	194	L>P																			0.00110156
VP2	1562	A	G	194	synonymous>L												0.00282812				0.00135156	0.00123438	0.0014375
VP2	1563	C	T	195	R>C												0.00126563
VP2	1564	G	A	195	R>H												0.00123438				0.0013125
VP2	1566	A	G	196	T>A												0.00111719			0.00140625
VP2	1568	C	T	196	synonymous>T											0.00116016	0.00121875
VP2	1569	A	G	197	N>D				0.00141406					0.00125391	0.00107812				0.00203125	0.00109375	0.00159375	0.00125	0.00153125
VP2	1571	T	C	197	synonymous>N	0.00117188	0.00183594	0.00134375	0.00235937	0.0021875	0.00150781	0.00232813	0.00214062	0.00314063	0.00232813	0.00299219	0.00242188	0.00292969	0.00304687	0.00263281	0.00129687	0.00171094	0.00215625	0.00178125
VP2	1573	A	G	198	N>S		0.0013125								0.00109375								0.00120312	0.00133594
VP2	1574	T	C	198	synonymous>N				0.00121875	0.00114453	0.00121094			0.00119531	0.00140625	0.00142187	0.00146875						0.00103125
VP2	1575	A	G	199	S>G				0.00108594										0.00125781
VP2	1577	T	C	199	synonymous>S		0.00234375	0.00112891	0.00173438	0.00132813	0.00123438		0.00152344	0.00196094	0.002	0.00152344	0.00140625	0.001625	0.00260156	0.00232813	0.00246875	0.00160938	0.00147656	0.00195312
VP2	1578	G	A	200	A>T				0.00107031
VP2	1580	T	C	200	synonymous>A	0.00165625	0.00211719	0.00360938	0.00345313	0.00298437	0.00278125	0.00136719	0.00200391	0.0033125	0.002625	0.00497656	0.00584375	0.00482812	0.00617188	0.00517969	0.00626562	0.0055	0.00517188	0.00509375
VP2	1581	A	G	201	T>A		0.00120312		0.00116797	0.00167188	0.00114453	0.00133594	0.0011875		0.00121875	0.00100781			0.00117188	0.00125781		0.00179688	0.00129687	0.00170312
VP2	1584	A	C	202	I>L											0.00160156
VP2	1584	A	G	202	I>V																0.00100781
VP2	1585	T	C	202	I>T															0.00124219	0.00125781
VP2	1586	T	A	202	synonymous>I														0.00103906	0.00132813	0.00116406
VP2	1586	T	C	202	synonymous>I		0.00158594		0.00101562					0.00128125			0.00123438	0.00104297	0.0015	0.00128125	0.00173438		0.00107031	0.00107812
VP2	1588	T	C	203	V>A			0.00115625	0.00119531	0.00117188	0.00105469		0.00161719	0.00110547	0.00105469	0.00133594	0.00110938		0.00142187	0.00192578	0.00120312	0.0011875	0.00159375	0.00178906
VP2	1590	A	G	204	M>V		0.0020625		0.00232031	0.00178125	0.00142578	0.00108594	0.00163281	0.00246875	0.00180469	0.0016875		0.002125	0.0019375	0.00246875	0.00233594	0.00170312	0.00215625	0.00211719
VP2	1591	T	C	204	M>T		0.00151563		0.00146875	0.00154687	0.00125	0.00114844		0.00179688		0.001375	0.0011875	0.00130469	0.00157031	0.0015	0.00188281	0.00122656	0.00153125	0.00157031
VP2	1593	C	T	205	P>S																	0.00114062
VP2	1595	A	G	205	synonymous>P		0.00221875	0.00264844	0.00310156	0.00198438	0.00196094	0.00133594	0.00161719	0.00217187	0.00228125	0.00275	0.00271875	0.00267188	0.00207813	0.00271875	0.00229687	0.00263281	0.00225	0.0029375
VP2	1596	T	C	206	Y>H							0.001125	0.00102734	0.00110938	0.00126953					0.00140625	0.00108594			0.00114062
VP2	1597	A	G	206	Y>C			0.0015	0.00110156						0.00149219			0.00113281			0.00100781	0.00148437	0.001125	0.00114062
VP2	1598	C	T	206	synonymous>Y				0.00107031
VP2	1599	A	G	207	T>A	0.00107031	0.00123047	0.001625	0.00171094	0.00179297	0.00189062	0.00149219	0.00187109	0.00135937	0.00102344	0.00157813	0.00175	0.00179688	0.00165625	0.00164062	0.00159375	0.00160938	0.00129687	0.00109375
VP2	1600	C	T	207	T>I				0.00141406
VP2	1601	C	T	207	synonymous>T													0.00157031			0.00107812
VP2	1602	A	G	208	N>D		0.00130469		0.00122656	0.00104688				0.00157813				0.00110938		0.0023125	0.001875	0.00157813	0.00184375	0.00102344
VP2	1603	A	G	208	N>S					0.00104297				0.00132031			0.001125			0.00134375		0.00117969	0.00107031	0.001125
VP2	1604	C	T	208	synonymous>N															0.00105859	0.00103125	0.00247656
VP2	1605	A	G	209	S>G		0.00109375		0.00123438	0.00107812					0.00114062		0.001125	0.0015625	0.0014375	0.00141406	0.00167188	0.001375		0.00129687
VP2	1607	T	C	209	synonymous>S		0.00116797	0.00139844	0.00164844	0.00158594	0.0020625	0.00108984	0.00192188	0.00238281	0.00161719	0.00259375	0.00135937	0.00203906	0.00139844	0.00164844	0.00177344	0.00290625	0.00177344	0.00338281
VP2	1608	G	A	210	V>I			0.00115234	0.00449219	0.005375	0.00722656	0.0114206	0.0144737	0.0356908	0.035074	0.0555921	0.0433799	0.0328125	0.0158923	0.0069375	0.00259375	0.00163281	0.00196875	0.00146875
VP2	1609	T	C	210	V>A									0.00157813		0.00106641	0.00150781	0.00120312					0.00129687	0.00120312
VP2	1610	A	G	210	synonymous>V		0.00215625	0.00210938	0.00226562	0.00263281	0.00275	0.0026875	0.00284375	0.00316406	0.0026875	0.00314844	0.00235937	0.0031875	0.00222656	0.00199219	0.00182031	0.00142969	0.00225	0.00273437
VP2	1613	T	A	211	synonymous>P												0.002625
VP2	1613	T	C	211	synonymous>P	0.00235937	0.0055625	0.0065	0.00720312	0.00498438	0.0048125	0.00307031	0.00264844	0.00951891	0.00178125	0.00775	0.00173438	0.00357813	0.00315625	0.00192969	0.00153125	0.003	0.0020625	0.00284375
VP2	1614	A	G	212	M>V		0.00109375		0.00108594					0.00107031			0.00140625					0.00107031
VP2	1615	T	C	212	M>T	0.00112891	0.003	0.00285937	0.00279688	0.00178516	0.00121484			0.00361719		0.00208594	0.00192188	0.00102344	0.00108594	0.00127734		0.00170312	0.0016875	0.00190625
VP2	1616	G	T	212	M>I												0.00151563
VP2	1618	A	G	213	D>G																0.00140625
VP2	1619	T	C	213	synonymous>D	0.00101562	0.00325	0.00174219	0.00282812	0.0015625	0.00175781	0.00141406	0.00310156	0.003375	0.00238281	0.00364062	0.0053125	0.00351562	0.0040625	0.00302344	0.00135937	0.00228906	0.00139063	0.00245313
VP2	1620	A	G	214	N>D
VP2	1621	A	G	214	N>S				0.00232031	0.00200391	0.00159375	0.00134375	0.00198828	0.00257031	0.002375	0.0015625	0.00204687	0.00105469	0.00170312	0.00205469	0.00191406	0.0018125	0.0018125	0.00253125
VP2	1623	A	G	215	M>V		0.00233594		0.00232813	0.00110156				0.0014375	0.00101562	0.00139063		0.00127734	0.00122656	0.00200781	0.00120703		0.0013125
VP2	1624	T	C	215	M>T		0.00114844
VP2	1626	T	C	216	F>L
VP2	1628	T	C	216	synonymous>F									0.00107422	0.00154687			0.00114844
VP2	1629	A	G	217	R>G		0.00175781														0.0015			0.00114844
VP2	1633	A	G	218	H>R		0.00128906												0.00164844	0.00109375		0.00171094	0.00140625	0.001125
VP2	1634	T	C	218	synonymous>H	0.00142969	0.00215625	0.002125	0.00239062	0.00196484	0.00190625	0.00183594	0.00171875	0.00292188	0.00203125	0.0033125	0.00117969	0.00261719	0.00204687	0.00196875	0.00108594	0.00175781	0.00211719	0.001625
VP2	1635	A	G	219	N>D		0.00129687										0.00128906
VP2	1636	A	G	219	N>S		0.00210156			0.00133594			0.00110938	0.00190625	0.00248437			0.00142187	0.00114062	0.00149609		0.00142187	0.00176562	0.0020625
VP2	1637	C	T	219	synonymous>N													0.00109375	0.0015625
VP2	1638	A	G	220	N>D												0.00103125				0.00121094
VP2	1640	C	T	220	synonymous>N				0.00179688		0.00100781	0.00107812	0.00100391	0.00117188		0.00162891			0.00342969	0.00488281	0.00572656	0.00573438	0.00389844	0.00144531
VP2	1641	G	A	221	V>I													0.00109375					0.00157813	0.00128125
VP2	1642	T	C	221	V>A		0.00207813	0.00177344	0.00119922	0.00238281	0.0014375	0.00197656	0.001875	0.00178906	0.00210938	0.00150391	0.0020625	0.00289063	0.0019375	0.00125781	0.00233594	0.00165625	0.00246094	0.00185156
VP2	1643	C	A	221	synonymous>V												0.00107031
VP2	1643	C	T	221	synonymous>V															0.00124219		0.0011875	0.00115625	0.00133594
VP2	1644	A	G	222	T>A	0.00110938	0.00146875		0.00150781		0.00102344		0.00136719	0.00123828	0.00147656	0.00113672			0.00215625	0.00167188	0.00149219	0.00135937	0.00149219	0.00178125
VP2	1646	C	G	222	synonymous>T				0.00132422	0.00115625
VP2	1646	C	T	222	synonymous>T																		0.00101562
VP2	1648	T	C	223	L>P	0.0016875	0.00567188	0.00314063	0.00629687	0.00402344	0.0030625	0.00226562	0.00112891	0.00703125	0.00107812	0.0031875	0.0013125	0.00183594	0.00190625	0.0016875	0.00109375	0.00159375	0.00196094	0.00219531
VP2	1649	A	G	223	synonymous>L		0.00153125	0.00150781	0.00345313	0.00167578	0.002	0.00151563	0.00144531	0.00421875	0.00139844	0.00301563		0.00119531	0.00321875	0.00192188	0.00353125	0.00282812	0.00503125	0.005375
VP2	1650	A	G	224	M>V		0.00174219	0.00120312	0.00207031	0.00138281				0.00215625		0.00123828			0.0015	0.00117578		0.001875	0.00116406	0.00183594
VP2	1651	T	C	224	M>T		0.00178125		0.00125					0.00251562									0.00114062	0.00128125
VP2	1653	G	A	225	V>I		0.0015	0.00342969	0.0048125	0.00416406	0.00455469	0.00517188	0.00728125	0.00978618	0.016324	0.0246505	0.0316612	0.0435033	0.0480263	0.0348684	0.0228207	0.0134046	0.0113487	0.00679688
VP2	1654	T	C	225	V>A		0.00275	0.002125	0.00355469	0.00233594	0.00291406	0.00275781	0.00301563	0.00347656	0.00201562	0.00370313	0.00464062	0.00232031	0.00175781	0.00100781	0.00128125	0.0010625	0.00221875
VP2	1655	T	C	225	synonymous>V		0.00109375	0.00178906	0.00234375	0.001125	0.00132813	0.00132813	0.00117969	0.00107031		0.00241406	0.00271875	0.00184375	0.0018125	0.00117188			0.00166406	0.00125
VP2	1656	A	G	226	I>V		0.00120312		0.00133594			0.00117188		0.00139063			0.001625				0.00146875	0.00134375		0.00105469
VP2	1657	T	C	226	I>T		0.00202344	0.00207813	0.00167188	0.00120312	0.00107422	0.00173438	0.00164453	0.00119141	0.00146875	0.00155078	0.00201562	0.00157031	0.00203125	0.00146875	0.0015625	0.00117188	0.002875	0.00246094
VP2	1658	C	T	226	synonymous>I											0.00112891
VP2	1661	A	G	227	synonymous>P										0.00104688						0.00128906	0.00151563	0.00107031	0.0015
VP2	1662	T	C	228	F>L		0.00166406							0.00103906						0.00108594		0.00121094	0.00127344	0.00141406
VP2	1663	T	C	228	F>S		0.00146875							0.0010625						0.00110156			0.00108594
VP2	1664	T	C	228	synonymous>F		0.00120312	0.001125													0.00113281		0.00115625	0.00123438
VP2	1666	T	C	229	V>A		0.00122656			0.00105469				0.00111719	0.00161719	0.00101172		0.0015	0.00114844	0.00109375	0.00142969		0.00108203	0.00197656
VP2	1667	A	G	229	synonymous>V		0.00105469		0.00110938				0.00107812			0.00128906	0.00215625	0.00184375	0.001625	0.00189062		0.00155469	0.00115625
VP2	1668	C	T	230	P>S		0.00103125
VP2	1669	C	T	230	P>L															0.00103516
VP2	1670	G	A	230	synonymous>P		0.00111719		0.00145313					0.00124609		0.00105469		0.00117188
VP2	1671	C	T	231	synonymous>L				0.00101172							0.0011875	0.0011875
VP2	1672	T	C	231	L>P				0.00109375								0.001125		0.00109766			0.00104688	0.00139844
VP2	1673	A	G	231	synonymous>L		0.00110156	0.00128906	0.00114844	0.00110156					0.00202344	0.0015	0.00204687		0.00121875				0.00103516
VP2	1675	A	G	232	D>G														0.00116406	0.00138281	0.00177344
VP2	1676	T	C	232	synonymous>D				0.00128125															0.00111719
VP2	1677	T	C	233	Y>H
VP2	1678	A	G	233	Y>C															0.00121875
VP2	1679	C	T	233	synonymous>Y									0.00107422
VP2	1680	T	C	234	C>R		0.0014375	0.00147656	0.00120703	0.00109375	0.00118359	0.00105078	0.00117188		0.00142187	0.0014375		0.00146094	0.00121484	0.00201562	0.00128906	0.00154687		0.00129687
VP2	1682	C	T	234	synonymous>C													0.00142187	0.00114062		0.00103906			0.00102344
VP2	1685	T	C	235	synonymous>P		0.00270312	0.00160938	0.00233594	0.00189062	0.00160938	0.00139063	0.00146094	0.00250781	0.00246875	0.00245313		0.00195312	0.00161719	0.00140625		0.00190625	0.00124219	0.00184375
VP2	1688	G	A	236	synonymous>G				0.00101562		0.0010625			0.00102344	0.00180469		0.00178906	0.00149219	0.002625	0.00196094	0.00121875		0.00159375
VP2	1689	T	C	237	S>P		0.00173438	0.00174219	0.00151563	0.00214844	0.00167188	0.00203125	0.00175781	0.00142969	0.00149219	0.0018125	0.00132031	0.00145313	0.00232813	0.002125	0.00215625	0.00209375	0.00171875	0.00263281
VP2	1691	C	T	237	synonymous>S					0.00152344	0.00151563	0.00235156	0.00313281	0.00389062	0.00410938	0.00464062	0.00690625	0.00557812	0.00429688	0.00295312	0.00160156	0.00139063	0.00103125
VP2	1692	A	G	238	T>A					0.00136719	0.00118359	0.00174219	0.00117969	0.00179688		0.00114062		0.00130469	0.0016875	0.00173438	0.001375	0.00167969	0.00175781	0.00160938
VP2	1695	A	G	239	T>A			0.00103906	0.0010625	0.00105859	0.00122656	0.00190625		0.00125	0.00174219		0.001125		0.00156641	0.002125	0.00123438	0.00122656	0.00121875	0.00147656
VP2	1697	G	A	239	synonymous>T									0.00110156	0.00119531	0.00126563	0.0014375	0.00110156	0.00229687	0.00232031	0.00203906	0.00117188	0.00160156
VP2	1698	T	C	240	Y>H	0.00100781	0.00170312	0.00348438	0.00414062	0.0036875	0.00303906	0.00391406	0.00464844	0.00635938	0.00775	0.0085625	0.00909375	0.008	0.00425	0.00197656	0.00167969	0.00175781	0.001125	0.00239062
VP2	1699	A	G	240	Y>C										0.00179688				0.00136719	0.00115625		0.00164062	0.00109766
VP2	1699	A	T	240	Y>F			0.00128125	0.0013125	0.00102734	0.00135937
VP2	1700	C	T	240	synonymous>Y										0.00123438	0.00114062	0.001125	0.00199219	0.00189062	0.00155469	0.00117969	0.0014375	0.0015625
VP2	1701	G	A	241	V>I																		0.00103125
VP2	1702	T	C	241	V>A	0.00112109	0.00140625	0.00129687	0.00166406	0.00174219	0.00220703	0.00196094	0.001375	0.00196875	0.00198438	0.00176562	0.0025625	0.00185156	0.00124609	0.00189844	0.00196875	0.00271875	0.00242188	0.00186719
VP2	1706	A	G	242	synonymous>P		0.00139063		0.00117188										0.00126563	0.00126563	0.00130469	0.00126563
VP2	1709	T	A	243	synonymous>I							0.00130469	0.00182031	0.00171875		0.00274219	0.00225	0.00453125	0.003125	0.00145313	0.00205469	0.0024375	0.00129297
VP2	1709	T	C	243	synonymous>I				0.00109375						0.00115625	0.00125		0.00151563	0.0015
VP2	1712	G	A	244	synonymous>T										0.00127344	0.00108594	0.00175	0.00205469	0.00121094	0.00104297	0.00128125
VP2	1713	G	A	245	V>I			0.00134766	0.00176562	0.00122266					0.00103125				0.00113281
VP2	1714	T	C	245	V>A		0.00230469		0.00145313	0.00101562		0.00119922	0.00107422	0.00139063	0.00204687	0.00113672	0.00101562	0.00124219	0.00172656	0.00154687	0.00178125	0.00139844		0.00172656
VP2	1715	C	T	245	synonymous>V										0.0013125
VP2	1716	A	G	246	T>A		0.0015		0.00122266				0.00104688				0.0010625		0.00129687		0.00123438	0.00128125		0.00125781
VP2	1718	G	A	246	synonymous>T							0.00135156	0.00115625	0.0019375		0.001875		0.00149219
VP2	1719	A	C	247	I>L			0.00151563	0.00359375	0.00385937	0.00403125	0.00475	0.00459375	0.00670312	0.0074375	0.00584375	0.00290625	0.0048125
VP2	1719	A	G	247	I>V		0.00103906					0.00147266	0.00118359	0.001375				0.00117188	0.00132031	0.0018125	0.0026875	0.0013125	0.00167969	0.00179688
VP2	1719	A	T	247	I>L				0.0031875	0.00209766	0.00171094	0.00242969	0.00216016	0.00198438	0.00155469	0.00160938		0.00102344
VP2	1720	T	C	247	I>T										0.00108594					0.00114062			0.00125781
VP2	1721	A	G	247	I>M			0.00217187	0.00240625	0.00171094	0.00134375	0.00119141	0.00109375	0.00160938	0.001625		0.00164062	0.00127344	0.0013125	0.00108594	0.0010625	0.00127344	0.00177344	0.00117188
VP2	1727	A	G	249	synonymous>P		0.00146875		0.00192188					0.00109375			0.00110156	0.00107812	0.00103125		0.00141406		0.00121875
VP2	1729	T	C	250	M>T		0.00146875	0.0011875	0.00133594					0.00136719	0.00109766		0.00176562		0.00110938	0.00115625		0.00103906	0.00138281
VP2	1731	T	C	251	C>R		0.00101562	0.00184375	0.001625	0.00138281	0.00103516	0.00126563	0.00203125	0.00129687	0.0015625	0.00160156	0.00160938	0.00123438	0.0020625	0.001375	0.00134375	0.00157031	0.001625	0.00232813
VP2	1733	T	C	251	synonymous>C		0.0020625	0.00157813	0.0014375	0.00119922	0.00128906	0.00152734	0.00133594	0.00174219	0.00260937	0.00132031	0.00109375	0.00196875	0.00172656	0.00174219	0.00298437	0.00142187	0.00111719	0.001875
VP2	1734	G	A	252	A>T			0.00114844
VP2	1735	C	T	252	A>V			0.00205469	0.00260937	0.00240625	0.00326563	0.0028125	0.00275	0.00164062	0.00182031				0.00135937
VP2	1736	C	T	252	synonymous>A
VP2	1738	A	G	253	E>G																0.00120312	0.0013125	0.00115625
VP2	1739	G	A	253	synonymous>E													0.00101953	0.00119531
VP2	1740	T	C	254	Y>H		0.0011875		0.00103906										0.00100391				0.00116406
VP2	1741	A	G	254	Y>C														0.00120312				0.00103125
VP2	1742	C	T	254	synonymous>Y		0.00125781									0.00115625			0.0180099	0.0270148	0.0263569	0.0231908	0.0147821	0.0141036
VP2	1743	A	G	255	N>D		0.00125781													0.00101172			0.0010625
VP2	1744	A	G	255	N>S	0.00116016	0.0048125	0.002	0.00396875	0.00282031	0.00159375	0.00133594	0.00160156	0.0021875	0.00195312	0.00282812	0.00116406	0.00145313	0.00136719	0.00213281	0.00230469	0.00228125	0.00284375	0.00272656
VP2	1745	T	C	255	synonymous>N		0.00371875	0.00154297	0.00314063	0.00179297	0.00196094	0.00119531	0.00105469	0.00189062		0.00257031		0.00228125	0.00104688	0.0011875	0.00123438	0.00282812	0.00125	0.00186719
VP2	1749	T	C	257	synonymous>L		0.00116406		0.00107812				0.00142969	0.00305469	0.00183594	0.00171094	0.00215625	0.0020625	0.00267188	0.00254688	0.00253906	0.00275	0.0034375	0.00316406
VP2	1750	T	C	257	L>S																0.00132031			0.00110938
VP2	1751	A	G	257	synonymous>L		0.00146094	0.00134375	0.00326563	0.00291406	0.00359375	0.00336719	0.00424219	0.0085	0.0114104	0.0190789	0.0296875	0.0411184	0.0313734	0.0149877	0.009	0.00728125	0.004875	0.00521875
VP2	1754	T	C	258	synonymous>R										0.00114062	0.00125		0.001125	0.00110938	0.00104688		0.00113281
VP2	1755	T	C	259	synonymous>L				0.00159375						0.00148437			0.00113281				0.001125
VP2	1757	A	G	259	synonymous>L		0.00146094		0.00150781	0.00101562		0.00113672		0.00101562		0.00145313	0.00184375	0.00197656	0.00140625	0.00155859	0.00110156	0.00145313
VP2	1759	C	T	260	A>V																		0.00142187
VP2	1760	A	G	260	synonymous>A	0.00100391	0.0018125	0.00240625	0.00220313	0.00188672	0.00123828	0.00217969	0.00141797	0.001625	0.00210938	0.00239844	0.0013125	0.00258594	0.00191406	0.00126953	0.00325781	0.002	0.00279688	0.00214062
VP2	1761	G	A	261	G>R		0.00114062	0.00174219	0.00255469	0.00125				0.00108594		0.00221875	0.00101562	0.00100781	0.00314063	0.00426563	0.004	0.00284375	0.00261719	0.00239062
VP2	1761	G	C	261	G>R			0.00100781	0.00179688					0.0011875
VP2	1762	G	T	261	G>V															0.00114062
VP2	1763	G	A	261	synonymous>G												0.00103125		0.002375				0.00121094
VP2	1765	A	G	262	H>R			0.00175391	0.00173438	0.00147656	0.00171875	0.00142187	0.00160938	0.00192969	0.00186719	0.00151563	0.00364062	0.00144531	0.001625	0.00165625	0.00246094	0.00211719	0.00254688	0.00188281
VP2	1766	C	T	262	synonymous>H									0.00106641	0.001125	0.00110156		0.00109375				0.00107031
VP2	1768	A	G	263	Q>R		0.00171875	0.002	0.002375	0.00171094	0.00180078	0.00164062	0.00109375	0.00123438	0.001125	0.00171875	0.0034375	0.00234375	0.00160938	0.00188281		0.00171875	0.00189062	0.00171094
VP2	1769	G	A	263	synonymous>Q												0.00120312		0.00233594	0.00121875	0.00121875
VP3	1772	C	T	1	synonymous>G							0.00102734		0.00137109	0.002	0.00207813	0.00359375	0.00265625
VP3	1773	T	A	2	L>I												0.0026875
VP3	1773	T	C	2	synonymous>L		0.002	0.00159375	0.00117578	0.00151563		0.0011875	0.0011875	0.00160156	0.00146875	0.0018125	0.00129687	0.00195312	0.00189062	0.0016875	0.00107031	0.002375	0.00160156	0.0020625
VP3	1774	T	G	2	L>*												0.002125
VP3	1775	A	G	2	synonymous>L		0.00164062	0.00132031	0.001875	0.00142969	0.00185938	0.00196875	0.00182031	0.00184375	0.00125	0.0016875	0.00198438	0.00260156	0.00214062	0.00221875	0.00210938	0.00251562	0.0016875	0.00146875
VP3	1775	A	T	2	L>F												0.001875
VP3	1776	C	A	3	P>T												0.00184375
VP3	1778	A	G	3	synonymous>P		0.00232813	0.00155469	0.00228125	0.0011875	0.00121094		0.00153906	0.00207031	0.00266406	0.00208594	0.00176562	0.00253125	0.00160938	0.00182812	0.001375	0.0013125	0.00135156	0.0016875
VP3	1779	A	G	4	T>A									0.0010625			0.00146875	0.001125			0.00107031
VP3	1781	C	T	4	synonymous>T											0.00223438	0.00110938
VP3	1782	A	G	5	M>V				0.00121875	0.00109375				0.00115625		0.00138281				0.00135156	0.001125			0.00103125
VP3	1783	T	C	5	M>T		0.00175		0.00110938					0.00110156	0.00121875							0.00103125	0.00108984
VP3	1785	A	G	6	N>D		0.00142969							0.00125	0.00117188		0.00129687		0.00153125	0.00134375	0.00147656	0.00226562	0.00107031	0.00125
VP3	1786	A	G	6	N>S								0.00128516				0.00128125	0.00107812	0.001125	0.00101562			0.00103125
VP3	1787	T	C	6	synonymous>N	0.00128906	0.00188281	0.00203906	0.00198438	0.00189844	0.00205469	0.00311719	0.0045625	0.00534375	0.006625	0.00479688	0.0059375	0.006875	0.00269531	0.00192969		0.00116406	0.00114844	0.00164062
VP3	1788	A	G	7	T>A										0.00116406
VP3	1790	T	C	7	synonymous>T		0.00207813	0.00125	0.00182031	0.00140625	0.00137109	0.00173438	0.00160938	0.00188281		0.00192188	0.00253125	0.00171875	0.00239062	0.00202344	0.00259375	0.00240625	0.00228906	0.00158594
VP3	1793	G	A	8	synonymous>P												0.00120312		0.00184375	0.00364844	0.00789062	0.0136924	0.0233141	0.0270148
VP3	1797	A	G	10	S>G		0.00153125					0.00104688		0.00103516	0.0010625		0.00171875		0.00167188	0.00115625	0.00185156	0.0023125	0.00170312	0.00219531
VP3	1799	C	T	10	synonymous>S				0.00151563					0.00104688
VP3	1800	T	C	11	C>R		0.0024375	0.0015625	0.00230469	0.00168359	0.00123438	0.00140625	0.001375	0.002	0.00114844	0.00189844	0.00160156		0.0013125	0.00128125	0.00178906	0.00180469	0.00185156	0.00184375
VP3	1802	T	C	11	synonymous>C		0.00192188	0.00264844	0.00220313	0.00126563	0.00144531	0.0016875	0.00220313	0.00251562	0.0029375	0.00203906	0.0038125	0.00297656	0.002125	0.00367187	0.00420312	0.00540625	0.00564063	0.0055625
VP3	1804	A	G	12	Q>R												0.00139063			0.00157422	0.001125			0.00110938
VP3	1805	A	G	12	synonymous>Q														0.00105469	0.00134375
VP3	1806	T	C	13	F>L		0.00101562													0.00110156
VP3	1808	T	C	13	synonymous>F																			0.00114844
VP3	1809	C	T	14	synonymous>L
VP3	1810	T	C	14	L>P		0.002125	0.00173438	0.00204687	0.00189844	0.00115625		0.0013125	0.00114062	0.00122656	0.00128906		0.00195312	0.00223438	0.00214062	0.00157813	0.00170312	0.00210938	0.00259375
VP3	1811	G	A	14	synonymous>L				0.00102734
VP3	1812	A	G	15	T>A		0.001625					0.00103125	0.00119531	0.00151563	0.001375		0.00125		0.00217187	0.00274219	0.00159375	0.00201562	0.00117188	0.0014375
VP3	1814	A	G	15	synonymous>T		0.002625	0.00114844	0.00207031		0.00103125			0.00163281			0.00140625	0.00210938	0.00172656	0.00182031	0.00210156	0.00189062	0.00190625
VP3	1815	T	C	16	S>P		0.0011875	0.00153125	0.00221875	0.00120312	0.00102344	0.00114062		0.00165625	0.00117969	0.00161719	0.00164062		0.00141406	0.00157031	0.0015625	0.00228125	0.00160938	0.00153125
VP3	1817	A	G	16	synonymous>S	0.00107031	0.00254688	0.00153125	0.00314063	0.00173438	0.00126953	0.00135156	0.00146875	0.00117578	0.001625	0.00254688	0.00296875	0.002625	0.00252344	0.00157813	0.00211719	0.00177344	0.00180469	0.00202344
VP3	1819	A	G	17	D>G	0.00123828	0.00233594	0.00140625	0.0014375		0.00115625	0.00185547	0.001625	0.0029375	0.00188281	0.00139844	0.00169531	0.00274219	0.00227344	0.00200781		0.00270312	0.00240625	0.00228906
VP3	1820	C	T	17	synonymous>D		0.00115625				0.00141406	0.00157422	0.00166406	0.00175781	0.00121875		0.00139844		0.00321875	0.00459375	0.00673437	0.00509375	0.00373437	0.00528125
VP3	1822	A	G	18	D>G		0.00153125	0.00107031		0.00143359	0.00167188	0.00101562	0.00147266	0.00190625	0.00167188		0.00225	0.00185938	0.00165625	0.00155469	0.00151563	0.00171875	0.00216406	0.00209375
VP3	1823	C	T	18	synonymous>D											0.00105859
VP3	1824	T	C	19	F>L	0.00101562	0.00190625	0.00173438	0.00264062	0.00116016	0.001625	0.00164062		0.00129687	0.00198438	0.00125	0.00225	0.00159375	0.00290625	0.00242188	0.00190625	0.00210938	0.00215625	0.00251562
VP3	1825	T	C	19	F>S																0.00121875
VP3	1826	C	T	19	synonymous>F													0.00104688
VP3	1828	A	G	20	Q>R				0.00126563													0.00105469	0.00126563	0.00149219
VP3	1829	A	G	20	synonymous>Q									0.0021875		0.00114062	0.00111719	0.00235937	0.00119531	0.001875				0.00107422
VP3	1830	T	C	21	S>P		0.00152344	0.00110156		0.001125	0.0011875	0.00110938	0.00100781	0.00157031			0.001875	0.00121875	0.00128906	0.00150391	0.00169531			0.00142187
VP3	1832	A	G	21	synonymous>S		0.00173438	0.00186719	0.00194531	0.00137891	0.00132813	0.00207813	0.00183594	0.00198438	0.00160156	0.00161719	0.00298437	0.0030625	0.00153906	0.00121875	0.00195312	0.00139844	0.001875	0.0011875
VP3	1835	A	G	22	synonymous>P					0.00101953			0.00160156	0.0014375	0.0015	0.00134375	0.00142187	0.00139844	0.00126563		0.00100781		0.00107812	0.00113281
VP3	1835	A	T	22	synonymous>P												0.00157813
VP3	1836	T	C	23	S>P		0.00157813		0.00225	0.00171094	0.00160938	0.001125		0.00150781		0.00167188	0.00234375	0.00164062	0.00117969	0.00158203		0.00160938	0.00171875	0.00179688
VP3	1838	C	T	23	synonymous>S										0.00105469	0.00132422		0.00167969	0.00103516	0.00128906	0.00127344	0.00209375	0.00232813	0.00278906
VP3	1841	C	T	24	synonymous>A				0.00139063			0.00103125		0.0014375	0.00140625	0.00198438		0.00103125
VP3	1842	A	G	25	M>V		0.0013125	0.00123438	0.00253906	0.00143359	0.00141406	0.00122266	0.0020625	0.00214062	0.00217187	0.00196484	0.00123438	0.00178125	0.00163281	0.00139063	0.00235937	0.001875	0.0014375	0.00264062
VP3	1843	T	C	25	M>T				0.00146094	0.00101172				0.00107812					0.00111719			0.00100781
VP3	1846	C	T	26	P>L																			0.00107812
VP3	1847	G	A	26	synonymous>P				0.00176562	0.00242188	0.00160938	0.00216406	0.0014375	0.00200781	0.00159375	0.00234375	0.00228125	0.00189844	0.00178125		0.00140625	0.00142969		0.00178125
VP3	1849	A	G	27	Q>R		0.00107031												0.00125781			0.00115625	0.00128125
VP3	1850	A	G	27	synonymous>Q		0.00182031													0.00146875	0.00116406		0.00113281
VP3	1851	T	C	28	Y>H																	0.00115625
VP3	1852	A	G	28	Y>C																			0.00117188
VP3	1853	T	C	28	synonymous>Y	0.00115234	0.0021875		0.00159375	0.00166016	0.00195312	0.00184375	0.00164062	0.00185156	0.00108594	0.00242969	0.00240625	0.00353125	0.002375	0.00225	0.00151563	0.00251562	0.00148437	0.00164062
VP3	1855	A	G	29	D>G		0.00217969	0.00104688	0.00225	0.00149219	0.0014375	0.00178125	0.00104297	0.00160156	0.00213281	0.00154687	0.00128125	0.00121094	0.00267969	0.0025625	0.00198438	0.00132813	0.00225	0.00271094
VP3	1856	C	T	29	synonymous>D										0.001625	0.0015625	0.002125	0.00253125	0.00141406	0.00110156	0.00135937		0.00140625	0.0016875
VP3	1857	G	A	30	V>I												0.0010625							0.00105469
VP3	1858	T	C	30	V>A	0.00155078	0.002375	0.00163281	0.00151563	0.002125	0.00216406	0.0024375	0.00199219	0.00227344	0.00170312	0.00155078	0.00228125	0.002	0.00153906	0.00275781	0.00197656	0.00139063	0.00234375	0.00239844
VP3	1859	C	T	30	synonymous>V											0.00124609	0.00141406	0.00278125					0.00103125
VP3	1860	A	G	31	T>A		0.00205469		0.00103516				0.00102344		0.00142969				0.00160156		0.00109375			0.00121094
VP3	1862	A	G	31	synonymous>T	0.00137109	0.00214062	0.00228125	0.00203906	0.00192188	0.00184375	0.0021875	0.00217969	0.00301563	0.00257031	0.00240625	0.00284375	0.00203125	0.00640625	0.00840625	0.0109375	0.0131579	0.0091875	0.00931332
VP3	1865	A	G	32	synonymous>P		0.00142969	0.00128125	0.00173438	0.0013125			0.0013125	0.00132813	0.00171094			0.00165625	0.00203125	0.00171875	0.0019375	0.0021875	0.00139063	0.00116406
VP3	1867	A	G	33	E>G		0.00129687	0.001625	0.00146094	0.00108984	0.00124219	0.00125	0.00125	0.00149219	0.00134375		0.00138281	0.00138281	0.0014375	0.00139453	0.00175781	0.00198438	0.00116406	0.00240625
VP3	1869	A	G	34	M>V		0.00211719		0.00148437	0.00111328	0.00140234		0.00123438			0.00100391			0.00232813	0.00192188	0.00222656	0.00110156	0.00196094	0.00167188
VP3	1870	T	C	34	M>T		0.00127344
VP3	1872	A	G	35	R>G	0.00191406	0.00317187	0.00328125	0.00510937	0.00405469	0.00320312	0.00225	0.00244531	0.00439062	0.00296875	0.00415625	0.00130469	0.0034375	0.00245313	0.00230469	0.00255469	0.00296094	0.00321875	0.00289063
VP3	1875	A	G	36	I>V		0.00154687		0.0015	0.0011875			0.00127344	0.00132031	0.00275	0.0013125	0.00225	0.00126563	0.00118359	0.00185938	0.002375	0.00228125	0.0019375	0.00178125
VP3	1876	T	C	36	I>T		0.00134375	0.0013125		0.00121875				0.00140625					0.00137891	0.00110156	0.00132031	0.00135937	0.00100781	0.00138281
VP3	1877	A	G	36	I>M				0.0014375		0.00101562	0.00124219	0.001375	0.00165625		0.0015625	0.00115625	0.00182812	0.00138281	0.00159375	0.0014375	0.00175	0.0016875	0.001375
VP3	1880	T	C	37	synonymous>P	0.00123438	0.00198438	0.00242188	0.0031875	0.00215625	0.00142187	0.00171875	0.001375	0.00253906	0.00142969	0.00264062	0.001625	0.0016875	0.002625	0.00200781	0.00370313	0.00195312	0.0011875	0.00178906
VP3	1883	T	C	38	synonymous>G	0.00119141	0.00175781		0.0011875	0.00179688	0.00167969	0.00215625	0.00100781	0.0025625	0.001875	0.00153906	0.0028125	0.0038125	0.00289063	0.00221094	0.00267969	0.0024375	0.00173438	0.00214844
VP3	1885	A	G	39	E>G		0.00225781	0.0011875	0.00207031	0.00175	0.00150391	0.00133594	0.00176562	0.00151563	0.00213281	0.00142578	0.00159375	0.00108594	0.00265625	0.00180469	0.00189844	0.00261719	0.00195312	0.00130469
VP3	1886	G	A	39	synonymous>E													0.0011875	0.0023125	0.00240625
VP3	1888	T	C	40	V>A	0.00114844	0.00196094	0.0011875	0.00153906	0.00130859	0.001375		0.00106641	0.00211719	0.00165625	0.00115234	0.0015625		0.00211719	0.0014375	0.00228906	0.00271875	0.00251562	0.00198438
VP3	1889	G	A	40	synonymous>V													0.00164062
VP3	1890	A	G	41	K>E		0.00135937	0.00103125			0.00104688	0.00101953	0.0016875	0.00118359	0.002125		0.0019375	0.00103125	0.00126563	0.00180469	0.00136719	0.00139063	0.00136719	0.00114844
VP3	1891	A	G	41	K>R
VP3	1892	A	G	41	synonymous>K				0.00103906		0.00134766		0.00148437	0.00251562	0.00251562	0.00173438	0.00126563	0.00192969	0.00446094	0.00651562	0.00892187	0.00648437	0.00542188	0.00429688
VP3	1894	A	G	42	N>S		0.00151563				0.00136719		0.001375	0.00158594	0.00108594	0.00105469	0.00121875	0.00182812	0.00130469	0.00110156	0.00149219		0.00175	0.00158594
VP3	1895	C	T	42	synonymous>N			0.00100781	0.00228906	0.00195703	0.00135937	0.00185938	0.00226562	0.00148047		0.00139063
VP3	1896	T	C	43	synonymous>L		0.0024375	0.001125	0.0028125		0.001125			0.00184375		0.00203906	0.00115625	0.00108594	0.0020625	0.00140625	0.002	0.00349219	0.0041875	0.00396875
VP3	1897	T	C	43	L>S		0.00111328		0.00107812											0.00125	0.001125	0.0011875
VP3	1898	G	A	43	synonymous>L		0.00151563		0.00109375
VP3	1899	A	G	44	M>V		0.00241406	0.00108984	0.0025	0.00107812				0.002	0.00100781	0.00130078		0.0014375			0.00123438	0.00117188	0.00203906	0.00165625
VP3	1900	T	C	44	M>T				0.00139063					0.0010625				0.00114453			0.00176562
VP3	1903	A	G	45	E>G												0.00135156			0.0018125	0.00127344	0.00101562	0.00107812
VP3	1904	A	G	45	synonymous>E										0.001125	0.00126953	0.00225	0.00191406	0.00259375	0.00196094	0.00110156	0.00127344	0.0025	0.00240625
VP3	1905	A	G	46	I>V		0.00202344	0.00100781	0.00176562	0.00128125	0.00114453		0.00186719	0.00185938	0.00130469		0.00161719	0.00163281	0.00165625		0.00196094		0.00180469	0.00290625
VP3	1906	T	C	46	I>T									0.00113281
VP3	1907	A	G	46	I>M		0.00128125		0.00136719	0.00120312	0.00113281	0.00119922	0.00100781	0.00110156		0.00125		0.00103906			0.00177344		0.00122656	0.00101172
VP3	1910	T	C	47	synonymous>A	0.00100781	0.00148437	0.00171875	0.00242188	0.00183594	0.00152734	0.00143359	0.00139063	0.00222656	0.00211719	0.00266016	0.00167188	0.00304687	0.0019375	0.00190625	0.00232813	0.00164844	0.001375	0.002125
VP3	1912	A	G	48	E>G		0.00164062	0.0011875	0.00107031	0.00107422	0.00122266		0.00145313	0.0016875	0.001625	0.00140625	0.0011875		0.00164062	0.00192188	0.00114062	0.00210156	0.00188281	0.00184375
VP3	1915	T	C	49	V>A				0.00101562			0.00109375									0.0018125	0.00125	0.00101562	0.00140625
VP3	1916	T	C	49	synonymous>V		0.00209375	0.00219531	0.00432813	0.00298437	0.00325	0.00341406	0.0035	0.00376562	0.003625	0.003	0.00334375	0.00228125	0.00105469	0.00153906	0.00133594	0.00100781	0.001125	0.00167188
VP3	1918	A	G	50	D>G		0.00189062	0.00124219	0.00184375	0.0018125	0.00196875	0.00264844	0.00214062	0.00259375	0.00257813	0.00197656	0.0014375	0.00260156	0.0025	0.00232031	0.00235156	0.00184375	0.00182031	0.00246875
VP3	1919	C	T	50	synonymous>D														0.00321875	0.00553906	0.00503125	0.00496875	0.00396094	0.00267188
VP3	1920	T	C	51	S>P	0.00151563	0.00147656	0.0018125	0.00153125	0.00134766	0.001625	0.00121094		0.00150781	0.00207031	0.00154687	0.001625	0.00185938	0.0011875	0.00126563	0.00175781	0.00223438	0.0015	0.00210938
VP3	1922	A	G	51	synonymous>S				0.00104688				0.00107812	0.0010625	0.00165625	0.00111719		0.00175	0.00103125		0.00117969			0.00164062
VP3	1924	T	C	52	V>A		0.00134375	0.00115625	0.00172656	0.00117969			0.00110938	0.00128906			0.00134375		0.00124219	0.00132031	0.00167188	0.00105469	0.00118359	0.0015625
VP3	1925	T	C	52	synonymous>V			0.0010625	0.0018125	0.00100391	0.00119531	0.00134375	0.00127344	0.0014375		0.00102734		0.00145313	0.00176562	0.00134375	0.001125	0.00159375	0.00108203	0.00135156
VP3	1927	T	C	53	V>A	0.00110156	0.00239062	0.00149609	0.00152734	0.00135156	0.00137891	0.00175781	0.0015625	0.00166406	0.00196875	0.00167188		0.00192188	0.001375	0.00229687	0.00208594	0.00151563	0.00279688	0.00279688
VP3	1931	A	C	54	synonymous>P			0.00207813	0.00126563
VP3	1931	A	G	54	synonymous>P		0.00282031		0.0024375					0.00129687	0.0011875	0.00188672	0.0010625	0.00178125	0.00121875	0.00140625	0.0026875	0.00179688	0.001625	0.00167188
VP3	1932	G	A	55	V>I				0.00123438					0.00104688
VP3	1933	T	C	55	V>A	0.00110156	0.00221875	0.00146875	0.00179297	0.00141406	0.00101562	0.00167188	0.0016875	0.0014375	0.00176562	0.00129297	0.00176562	0.00160938	0.00189844	0.00202734	0.00139844	0.00114844	0.0018125	0.00152344
VP3	1936	A	G	56	Q>R
VP3	1937	A	C	56	Q>H			0.00126563	0.00209375
VP3	1937	A	G	56	synonymous>Q											0.00105859
VP3	1937	A	T	56	Q>H				0.00146484					0.00110938		0.00382031	0.003875	0.00478125	0.00425	0.00272656
VP3	1939	A	G	57	N>S															0.0011875
VP3	1940	T	C	57	synonymous>N											0.00155469	0.0011875	0.00117188
VP3	1941	G	A	58	V>I
VP3	1942	T	C	58	V>A		0.00164062		0.00126563	0.00125781					0.0013125					0.0010625			0.00111719
VP3	1943	T	C	58	synonymous>V				0.00187891		0.0011875			0.00217187	0.00129687	0.00183594		0.00136719	0.00144531		0.00121875	0.00161719	0.00125	0.00107031
VP3	1945	G	A	59	G>E		0.00120703	0.00222656	0.00280469
VP3	1946	A	G	59	synonymous>G		0.002625	0.00233594	0.00264062	0.00126563	0.001625	0.00128906	0.00199219	0.00276563	0.00192188	0.00255469	0.00159375	0.00332031	0.00257813	0.00203906	0.00203906	0.00235156	0.00242969	0.002125
VP3	1948	A	G	60	E>G	0.0015	0.00133594		0.00110547	0.00109766	0.00102344				0.00103906				0.00117188	0.00171484	0.00177344	0.00120312	0.00175781	0.00163281
VP3	1950	A	G	61	K>E		0.001375		0.00159375		0.00109375		0.00160938	0.00100781			0.0010625		0.00185938	0.00153125	0.00178906	0.00122656	0.00149219	0.0016875
VP3	1951	A	G	61	K>R		0.00270312	0.00152344	0.0028125	0.00142578	0.00132031	0.00153516	0.00170312	0.00232031	0.00170312	0.00174219	0.00185156	0.0020625	0.00202344	0.00220313	0.0021875	0.00219531	0.00198438	0.00239062
VP3	1952	G	A	61	synonymous>K													0.00160156
VP3	1953	G	A	62	V>I														0.0157689	0.0201069	0.0130962	0.00946875	0.00796875	0.00660156
VP3	1954	T	C	62	V>A			0.002		0.00100391	0.00126563	0.00198438	0.00130859	0.00197656	0.00192969	0.00135547	0.0014375	0.00103125	0.001625	0.00173438	0.00224219	0.00146875	0.00198438	0.00233594
VP3	1956	A	C	63	N>H														0.0505345	0.126234	0.199671	0.252416	0.270919	0.284796
VP3	1956	A	G	63	N>D		0.00144531	0.00157813	0.00207031	0.00141016	0.00118359	0.00128125		0.00192188	0.00114844	0.00125	0.00101562	0.00171875	0.0263158	0.0328125	0.0300987	0.0212582	0.0155016	0.0140625
VP3	1956	A	T	63	N>Y														0.00943668	0.0184211	0.0281661	0.0310855	0.0335115	0.0360197
VP3	1957	A	G	63	N>S		0.00178125		0.00152734	0.00196875	0.00146094		0.00150781	0.0023125		0.00105469	0.00175	0.00223438	0.0202303	0.0328125	0.0244655	0.025	0.0287418	0.0277138
VP3	1959	T	C	64	S>P		0.00159375	0.00130078	0.00228125	0.00117188	0.00125		0.00132813	0.00154687		0.00124219	0.0010625	0.00146875	0.00160938	0.00153125	0.00171875	0.00279688	0.00140625	0.00192969
VP3	1961	T	C	64	synonymous>S	0.00150781	0.00340625	0.00310938	0.00402344	0.00245313	0.00216406	0.0020625	0.00190625	0.00401562	0.00121875	0.00373437	0.00245313	0.00235937	0.00165625	0.00202344	0.0014375	0.00177344	0.00132031	0.002
VP3	1963	T	C	65	M>T		0.00182812	0.00124609	0.00139844	0.00110938	0.00103516					0.00128906						0.00103906	0.0015625
VP3	1966	A	G	66	E>G												0.001375
VP3	1967	A	G	66	synonymous>E	0.00101953	0.002625	0.00260156	0.0025625	0.00196875	0.00173828	0.00130469	0.00234375	0.00425	0.003	0.00308594	0.00342187	0.00317187	0.00319531	0.00260156	0.00284375	0.00336719	0.001625	0.00310938
VP3	1970	A	G	67	synonymous>A		0.00109375	0.00175	0.0030625	0.00184766	0.00201562	0.00239062	0.00372656	0.00199219	0.00323438	0.001875	0.0020625	0.00170312	0.0015625	0.00260156	0.00321875	0.00403125	0.004625	0.0055625
VP3	1970	A	T	67	synonymous>A														0.00246875	0.00438281	0.00403125	0.00471094	0.0059375	0.00458594
VP3	1971	T	C	68	Y>H	0.00105859	0.00140625		0.00129687	0.00107422										0.00133594	0.00190625	0.00159375
VP3	1972	A	G	68	Y>C		0.00171875	0.00117188	0.00116016		0.00104688	0.00127344		0.00182031	0.00108594	0.00129687	0.001875	0.00104688		0.00138281	0.00110938		0.00167188	0.00109766
VP3	1973	C	T	68	synonymous>Y														0.00103906
VP3	1975	A	G	69	Q>R		0.0015625		0.00123828		0.00122656						0.00132813	0.00140625	0.00138281			0.00179688	0.00178125	0.00125781
VP3	1976	G	A	69	synonymous>Q																0.001375		0.00158594
VP3	1976	G	C	69	Q>H		0.00192188	0.00375	0.00603906	0.00230469	0.00182812
VP3	1976	G	T	69	Q>H			0.0013125	0.00215625
VP3	1977	A	G	70	I>V		0.00448438	0.00180469	0.00203125	0.00210156	0.00159375	0.0016875	0.00114844	0.00215625	0.00178125	0.00178906	0.00134375	0.00164844	0.00196875	0.00257031	0.00158594	0.00184375	0.00123047	0.00215625
VP3	1978	T	C	70	I>T		0.00116406		0.00142187				0.00126563
VP3	1979	A	G	70	I>M		0.00117188		0.00121094	0.00148437				0.001625	0.00141406		0.00124219	0.00175781	0.00104688	0.00115234	0.00167188	0.00103125
VP3	1979	A	T	70	synonymous>I														0.00225781	0.00103125
VP3	1982	T	A	71	synonymous>P									0.00200781	0.00101953	0.00211328
VP3	1982	T	C	71	synonymous>P	0.0021875	0.00361719	0.00296875	0.00553125	0.00353125	0.003625	0.00275	0.00238281	0.00444531	0.00290625	0.0045	0.0028125	0.00286719	0.00342187	0.00236719	0.0033125	0.00171094	0.002625	0.00277344
VP3	1984	T	C	72	V>A							0.00125		0.00182812	0.00129687		0.00152344		0.00103906	0.00105078	0.00126172			0.0015
VP3	1985	G	C	72	synonymous>V				0.00191406
VP3	1986	A	G	73	R>G		0.00167188	0.00159375	0.002625	0.00198438	0.00207422	0.00159375	0.00165625	0.00228906	0.001625	0.002	0.00207813	0.00171094	0.00214062	0.0029375	0.00240625	0.00175	0.00242188	0.00215625
VP3	1988	A	G	73	synonymous>R		0.00217187	0.00153906	0.00159375	0.00172656	0.00237891	0.00182812	0.00230469	0.00158594	0.00414062	0.00158594	0.002375	0.00247656	0.00261719	0.00232813	0.00271094	0.00275	0.00282812	0.00208594
VP3	1989	T	C	74	S>P		0.00155469	0.00101953	0.00127344	0.00120703				0.00185938	0.00122656	0.0013125	0.00173438			0.00157813	0.00142187	0.00164062	0.00140625	0.00178125
VP3	1992	A	G	75	N>D		0.00142187	0.00110938	0.00195312	0.00139844	0.0014375	0.00122656	0.00146875	0.00132813	0.00117969	0.00166406	0.00126563	0.00142187		0.00139844	0.00211719	0.0015625	0.00148437
VP3	1993	A	G	75	N>S		0.0018125	0.00289844	0.00375	0.00407031	0.00339062	0.00338281	0.0035625	0.00270312	0.00423437	0.00325781	0.00121875	0.00234375	0.00102344	0.00121094	0.00142187		0.00135937	0.00114844
VP3	1994	C	T	75	synonymous>N			0.0014375	0.00150781	0.00134766				0.00223438		0.00222656		0.00172656	0.00127344	0.00131641
VP3	1995	G	C	76	E>Q		0.00126172	0.0039375	0.00630469	0.00235156
VP3	1996	A	C	76	E>A			0.00153516	0.00307812	0.0038125	0.00316406	0.00324219	0.00221875	0.00202344	0.00121094	0.00119922	0.00103125
VP3	1996	A	G	76	E>G	0.00320312	0.0257812	0.164433	0.402467	0.490615	0.554862	0.583866	0.573237	0.511153	0.491632	0.477385	0.467023	0.493483	0.412336	0.472111	0.532946	0.605551	0.642434	0.666771
VP3	1996	A	T	76	E>V		0.00132813	0.004	0.0102796	0.00934375	0.00825	0.00625	0.00394531	0.00367187	0.00346875	0.00369531	0.00334375	0.0015625	0.00108984	0.00109375
VP3	1997	A	G	76	synonymous>E	0.00105859	0.00285937	0.00144531	0.00326563	0.00225781	0.00246875		0.00240625	0.00475781	0.00257813	0.00417969	0.00271875	0.00221875	0.00309375	0.00228125	0.00229687	0.00190625	0.00207031	0.00291406
VP3	2000	A	G	77	synonymous>G		0.00208594	0.00210156	0.00203125	0.00142969	0.00173828	0.00142187	0.00227344	0.00175	0.00239062	0.00207813	0.001125	0.00190625	0.00239062	0.0019375	0.00151563	0.00276563	0.0025	0.00317187
VP3	2001	T	C	78	S>P		0.00192188	0.00142969	0.00228906	0.00183594	0.00146094	0.00107031	0.00125781	0.002		0.0010625	0.00102344	0.0014375	0.00102344				0.00167188	0.00123438
VP3	2003	T	C	78	synonymous>S		0.00160156	0.00136328	0.00135156		0.00103125			0.00188281	0.00123438	0.00148437	0.0013125	0.00182031	0.00173828	0.00171875	0.00126563	0.00171875	0.00135937	0.00153125
VP3	2006	A	G	79	synonymous>G								0.00111719	0.00125781	0.00180469		0.00167188	0.00102344	0.00186719	0.00129687	0.001125			0.00107031
VP3	2007	A	G	80	T>A		0.00309375	0.00210938	0.00309375	0.002125	0.0016875	0.00253125	0.00186719	0.00175	0.00200781	0.00173828	0.00189062	0.00241406	0.00235937	0.00307031	0.00284375	0.0030625	0.00247656	0.00325
VP3	2008	C	T	80	T>M																		0.00103125
VP3	2009	G	A	80	synonymous>T		0.00105469
VP3	2011	A	G	81	Q>R		0.00127344
VP3	2011	A	T	81	Q>L			0.00171094	0.00396875	0.00180078	0.00138672
VP3	2012	A	G	81	synonymous>Q		0.00275	0.00161719	0.00253125	0.00165625	0.00200391	0.00189062	0.00108594	0.00241406	0.00253125	0.00277344	0.00129687	0.0021875	0.00252344	0.00227734	0.00160938	0.00225781	0.00234375	0.00235156
VP3	2014	T	C	82	V>A			0.002125	0.00221875	0.00187891	0.002			0.00116016						0.0010625	0.0011875
VP3	2015	A	G	82	synonymous>V				0.00115625				0.001375	0.00133594		0.00112109		0.00278906
VP3	2016	T	C	83	F>L		0.00155469	0.00110938		0.00108203			0.00105469						0.00142187	0.0013125			0.00101562
VP3	2017	T	C	83	F>S																			0.00128125
VP3	2018	C	T	83	synonymous>F		0.00190625	0.00150781	0.00164062	0.00110938		0.0013125	0.00103125		0.00129297	0.00258594	0.00215625	0.00185938	0.00257813	0.0015				0.00113281
VP3	2022	T	C	85	F>L	0.00178125	0.00201562	0.00192188	0.002125	0.00178906	0.00157813	0.00152344	0.00215625	0.00275781	0.0019375	0.001875	0.002125	0.0023125	0.0021875	0.00271094	0.00179688	0.00164062	0.00189062	0.00196094
VP3	2023	T	C	85	F>S		0.00126563	0.00133984	0.00175781	0.00105469						0.00143359		0.00126563	0.00164844	0.00167188	0.00248437	0.00107031	0.00108594	0.00205469
VP3	2024	T	C	85	synonymous>F	0.001625	0.00157031	0.00221875	0.00199219	0.00201172	0.00196875	0.00159375	0.00196875	0.00170312	0.00228125	0.00222656	0.0025	0.00251562	0.00216406	0.0031875	0.00185156	0.002625	0.0030625	0.00229687
VP3	2027	A	G	86	synonymous>P		0.00111719		0.00111719			0.00111719	0.00121875	0.0025	0.00133594	0.00121094			0.00182812		0.0015		0.00166406	0.00189844
VP3	2028	C	T	87	synonymous>L											0.00171875	0.00175	0.00130859	0.00145313				0.00110156
VP3	2029	T	C	87	L>P		0.00146094								0.00132813			0.00154687	0.00123438	0.00125	0.00150781	0.00126563
VP3	2032	A	G	88	Q>R									0.00102344					0.00142969	0.00117969	0.00107031			0.00162109
VP3	2033	A	G	88	synonymous>Q		0.00228906	0.00114844	0.00201562	0.00198438	0.00185938	0.00164844	0.00161719	0.0021875	0.00223438	0.00189844	0.00108594	0.00228906	0.0021875	0.00275781	0.00220313	0.00325	0.00284375	0.00196094
VP3	2036	A	G	89	synonymous>P		0.001375	0.00105469	0.00123438	0.00101562			0.00105078		0.00125781	0.00115625				0.00128125			0.00121094	0.00135547
VP3	2040	T	C	91	Y>H				0.00111719			0.00104688	0.00167188	0.00174219	0.00160156			0.00136719						0.00108984
VP3	2041	A	G	91	Y>C	0.00103906	0.0013125		0.0015			0.00121875	0.00114453	0.00133984	0.00105469			0.00160156	0.00127344	0.0015		0.00121094	0.001625
VP3	2042	C	T	91	synonymous>Y													0.00150781		0.00114844		0.0010625
VP3	2043	T	C	92	S>P				0.00139063				0.00101953	0.00135156		0.00124219	0.00104688	0.00124219	0.0014375	0.00110938		0.00115625	0.00134375	0.00151563
VP3	2045	G	A	92	synonymous>S		0.00115625												0.00123828	0.00172656	0.0013125	0.00146094		0.00106641
VP3	2046	A	G	93	S>G		0.00105469	0.00114844	0.00115625	0.00125			0.00132813	0.00207031	0.00138281	0.00135937			0.00167188	0.00152344		0.00126563	0.00111328	0.00146875
VP3	2048	T	C	93	synonymous>S				0.00152344	0.00189844	0.00159375	0.00255469	0.00188281	0.00192188	0.00275781	0.00178906	0.00170312	0.00160156	0.00135937		0.00115625		0.00117188
VP3	2050	T	C	94	V>A								0.00109375					0.00107812	0.00155469	0.00147656	0.00111719	0.0015	0.00134375	0.00204687
VP3	2051	T	C	94	synonymous>V		0.0015	0.00105469	0.00166406	0.00209375	0.00239844	0.00303906	0.00414844	0.00429688	0.00421875	0.00539062	0.00364062	0.0056875	0.00525	0.0024375	0.0010625	0.0010625		0.00103125
VP3	2052	T	C	95	F>L																			0.00109375
VP3	2055	A	G	96	S>G		0.001875	0.00257813	0.00302344	0.00158984						0.0018125	0.00178125	0.0013125
VP3	2057	T	C	96	synonymous>S	0.00103125	0.00183594	0.00151563	0.003625	0.0043125	0.00444531	0.00449219	0.00325	0.00464062	0.0035	0.00391406	0.00371875	0.00464844	0.00457031	0.00432031	0.00371875	0.0039375	0.00228125	0.00396875
VP3	2061	A	G	98	T>A		0.0015				0.001125		0.00103125	0.00177344	0.00145313				0.0015	0.0020625	0.00244531	0.00111719	0.00142969	0.00215625
VP3	2063	G	A	98	synonymous>T				0.00147656	0.00142187	0.00175	0.00189062	0.00373437	0.00314063	0.00361719	0.00360156	0.00246875	0.00496094	0.0050625	0.00532812	0.00535937	0.00520313	0.00323438	0.0031875
VP3	2065	T	C	99	L>P	0.00148437	0.00129687	0.0013125	0.00184375	0.00180469		0.00220313	0.00122656	0.00198438	0.0023125	0.00108203	0.00221875	0.00122656	0.00210156	0.00185938	0.00259375	0.00198438	0.00139844	0.00264844
VP3	2066	C	T	99	synonymous>L																			0.00111719
VP3	2067	C	T	100	synonymous>L		0.0010625												0.00142187	0.00242969	0.00159375	0.0015625	0.00195312	0.00142187
VP3	2068	T	C	100	L>P		0.00325	0.00214062	0.0023125	0.00106641	0.00162891			0.00146875		0.00172656		0.00102344			0.00142187		0.00119141	0.00123828
VP3	2069	A	G	100	synonymous>L		0.002125	0.0021875	0.00470312	0.00340625	0.00311719	0.00214844	0.00269531	0.0031875	0.00175781	0.00522656	0.00109375	0.00246875	0.00128125	0.00182812	0.00115625	0.00171875	0.00165625	0.00171875
VP3	2072	A	G	101	synonymous>G	0.00115625	0.0030625	0.00271875	0.00195312	0.00272656	0.00348438	0.0035625	0.00290625	0.0025	0.0049375	0.00270312	0.00482812	0.00415625	0.0101151	0.00765625	0.0076875	0.00621875	0.00553125	0.00521875
VP3	2074	A	G	102	E>G		0.00190625	0.00107031	0.00199219	0.00157422	0.00254688	0.00178906	0.00153125	0.00222656	0.00136719	0.00175	0.00246875	0.00246875	0.00279688	0.00279688	0.00228125	0.00278125	0.00259375	0.00303125
VP3	2075	G	A	102	synonymous>E													0.00100391						0.00121875
VP3	2076	A	G	103	I>V		0.00242969	0.00244531	0.00230469	0.00285937	0.00239062	0.00234375	0.00248437	0.0050625	0.0058125	0.00803125	0.0079375	0.00578125	0.00227344	0.00253125	0.00203125	0.00235156	0.00233594	0.00289063
VP3	2077	T	C	103	I>T		0.00110938		0.00117188				0.00103906	0.0015	0.00182812						0.00148437	0.00108594	0.00166406
VP3	2079	T	C	104	synonymous>L	0.00104688	0.00225781	0.00178125	0.00316406	0.00271875	0.0024375	0.0026875	0.00211719	0.0033125	0.00221875	0.00303125	0.0016875	0.00116406	0.00233594	0.00161328	0.00107812	0.00199219	0.0016875	0.001875
VP3	2082	A	G	105	N>D													0.00146875	0.00171875	0.00169141	0.00108594	0.00122656	0.0010625	0.00123438
VP3	2083	A	G	105	N>S		0.00122656		0.00117969				0.00165625	0.00170312	0.00142187	0.00165625			0.0011875	0.00138281	0.00173438	0.00164062	0.00164062	0.00135937
VP3	2084	C	T	105	synonymous>N																			0.00107812
VP3	2085	T	C	106	Y>H		0.00154687	0.00164453	0.00232031					0.001375		0.00118359
VP3	2086	A	G	106	Y>C		0.00109375
VP3	2087	T	C	106	synonymous>Y	0.0020625	0.00448438	0.00347656	0.0065	0.00303125	0.00272656	0.00188281	0.00134766	0.00432813	0.00271094	0.00467187		0.003875	0.00205469	0.00132031	0.00128906	0.00185156	0.00128906	0.00186719
VP3	2088	T	C	107	Y>H			0.00103125	0.00128125
VP3	2089	A	G	107	Y>C		0.0016875										0.00103125
VP3	2090	T	C	107	synonymous>Y	0.00210938	0.004375	0.00385156	0.00490625	0.00310938	0.00221875	0.00215625	0.00239062	0.00378125	0.00345313	0.00490625	0.00284375	0.003375	0.00364062	0.00232031	0.00210938	0.0039375	0.0028125	0.00271875
VP3	2091	A	G	108	T>A		0.00123828		0.00103906					0.00124219
VP3	2093	A	G	108	synonymous>T		0.00274219	0.00103125	0.00181641	0.00170312	0.00176562		0.00128906	0.00205469	0.00140625	0.00198047		0.00164062	0.0018125	0.00242188	0.00267969	0.0028125	0.00234375	0.00239062
VP3	2095	A	G	109	H>R		0.0016875				0.00119141			0.00134375	0.00105469				0.00145313	0.00113281
VP3	2096	T	C	109	synonymous>H	0.0020625	0.0049375	0.004625	0.007875	0.00351562	0.00228125	0.00135937	0.001375	0.00646875	0.00214062	0.00525	0.00289063	0.0034375	0.001875	0.00191016	0.002	0.00164062	0.00227344	0.00203125
VP3	2097	T	C	110	W>R	0.00117188	0.00320312	0.00139063	0.003625	0.001125		0.00155078		0.00203125	0.00139063	0.00177734		0.00139844	0.00110547				0.00165625
VP3	2100	T	C	111	S>P		0.00140625	0.00119531	0.00103906	0.00132422	0.00123438	0.0018125	0.00154687	0.00104688	0.0015	0.00132813		0.00142187	0.00101953	0.00139844	0.00130469		0.00178125	0.00114062
VP3	2102	A	G	111	synonymous>S	0.00139063	0.00246875	0.00183594	0.00235937	0.00225	0.00226562	0.00109375	0.00217187	0.0024375	0.00259375	0.0024375		0.002375	0.00185938	0.00276563	0.00240625	0.00260937	0.00228125	0.00253125
VP3	2102	A	T	111	synonymous>S				0.00248437	0.00155469	0.0013125	0.00139063		0.00103906
VP3	2105	C	T	112	synonymous>G			0.001625	0.0014375	0.00185547	0.00110547	0.0010625	0.001125		0.00171875
VP3	2106	A	G	113	S>G	0.00132031	0.00157031	0.00177344	0.00219531	0.00205469	0.00129687	0.00136328	0.00182812	0.00165625		0.00216016		0.00195312	0.00152734	0.00190625		0.00204687	0.00148437	0.00161719
VP3	2108	C	T	113	synonymous>S													0.00128125
VP3	2109	A	G	114	I>V		0.00178125	0.00141016	0.00198438	0.00119531			0.00130469	0.00135547	0.00196875	0.00142969		0.00132813	0.00161719	0.00179688	0.001125	0.00242188	0.00180469	0.00223438
VP3	2110	T	C	114	I>T									0.00112891
VP3	2111	A	G	114	I>M												0.001125						0.00101172
VP3	2112	A	G	115	K>E		0.00120312														0.00114844
VP3	2113	A	G	115	K>R		0.00275	0.00155469	0.00159766	0.00127344				0.00213281	0.00165625	0.00136719	0.00115625	0.00230469	0.00210938	0.00159375	0.0010625	0.00345313	0.0018125	0.00200781
VP3	2116	T	C	116	L>P	0.00224219	0.00340625	0.00319531	0.00498438	0.00169922	0.0014375	0.00148047	0.0014375	0.00295312		0.00271094	0.00117969	0.00129687	0.0016875		0.00147656	0.00255469	0.00204687	0.00271094
VP3	2117	T	C	116	synonymous>L	0.00207813	0.00304687	0.00215625	0.00439062	0.00171875	0.00207031	0.00151563	0.00201562	0.00350781	0.00239844	0.00463281	0.00211719	0.00214062	0.00142187	0.00109375		0.00146875		0.00111719
VP3	2118	A	G	117	T>A				0.00100781														0.00171094
VP3	2119	C	T	117	T>M		0.00126563							0.00128516
VP3	2120	G	A	117	synonymous>T											0.00175781		0.00232813	0.00185156	0.00160938		0.00163281		0.00110547
VP3	2121	T	C	118	F>L		0.00198438		0.00106641										0.00131641		0.00103906		0.00129687	0.00152344
VP3	2122	T	C	118	F>S		0.00176562	0.00105469	0.00219531	0.00144531				0.00123438		0.00153125			0.00129687		0.00166406	0.00142187	0.00110156
VP3	2123	T	C	118	synonymous>F		0.00178125	0.0015625	0.00254688	0.00185156	0.00189844	0.00215625	0.0020625	0.00348438	0.00328906	0.00351562	0.00189062	0.004625	0.00451563	0.00215625	0.001625	0.00103125
VP3	2125	T	C	119	M>T		0.002625	0.00105859	0.0025	0.0011875				0.0015	0.00126563	0.00167188			0.00172656			0.00157031	0.00148437	0.00139063
VP3	2126	G	A	119	M>I		0.00117188	0.00119922	0.00111328
[truncated: 886 more rows]

## Sheet: replicate 3
Feature	Position	Reference	Aternate	AA_position	AA_change	p1_299_2	p3_299_2	p5_299_2	p7_299_2	p9_299_2	p11_299_2	p13_299_2	p15_299_2	p17_299_2	p19_299_2	p21_299_2	p23_299_2	p25_299_2	p27_299_2	p29_299_2	p31_299_2	p33_299_2	p35_299_2	p37_299_2	p39_299_2	p40_299_2
[truncated: 1,934 more rows]

[truncated: 3 more sheets: replicate 4, replicate 5, replicate 6]
